# Supplementary material for: Lewis acid-promoted cyclizations of o-alkyloxyphenyl-substituted ynamides to construct 2-amidobenzofurans
Source: Royal Society of Chemistry journal article supplement (doi:10.1039/d2qo01246d), 2022-01-01

SUPPORTING INFORMATION

**Lewis acid-promoted cyclizations of *o*-alkyloxyphenyl-substituted ynamides  
to construct 2-amidobenzofurans**

Hui Xu, Yangpeng Liu, Lixia Ding, Xiao-Na Wang,\* and Junbiao Chang\*

Collaborative Innovation Center of New Drug Research and Safety Evaluation, Henan Province, Key  
Laboratory of Advanced Drug Preparation Technologies, Ministry of Education, School of  
Pharmaceutical Sciences, Zhengzhou University, Zhengzhou, Henan 450001, P. R. China

**Table of Contents**

|                                                                                          |     |
|------------------------------------------------------------------------------------------|-----|
| Part I Experimental Part.....                                                            | S2  |
| General Information.....                                                                 | S2  |
| 1.1 Synthesis of <i>o</i> -Alkyloxyphenyl-Substituted Ynamides .....                     | S2  |
| 1.2 Optimization of the Intermolecular Reaction (Table S1).....                          | S8  |
| 1.3 Cyclization of <i>o</i> -Anisole-Substituted Ynamides with Acyl Chlorides .....      | S8  |
| 1.4 Optimization of the Intramolecular Reaction (Table S2).....                          | S29 |
| 1.5 Intramolecular Reaction of <i>o</i> -Anisole-Substituted Ynamides .....              | S30 |
| 1.6 Cyclizations of Other <i>o</i> -Alkyloxyphenyl-Substituted Ynamides (Scheme 2) ..... | S36 |
| 1.7 Gram-Scale Synthesis and Chemical Transformations (Scheme 3) .....                   | S37 |
| References.....                                                                          | S41 |
| Part II Copies of <sup>1</sup> H NMR, <sup>13</sup> C NMR and Mass Spectra.....          | S40 |

## Part I Experimental Part

### General Information

Unless otherwise indicated, all starting materials were obtained from commercial supplies and used as received. *o*-Alkyloxyphenyl-substituted ynamides were prepared according to the literatures.<sup>1-12</sup> All acyl chlorides were purchased. All reactions were performed in oven-dried glassware under nitrogen atmosphere. Solvents were distilled prior to use. Chromatographic separations were performed using 200~300 mesh silica gel. <sup>1</sup>H NMR and <sup>13</sup>C NMR spectra were obtained on a Bruker's Ascend™ 400 NMR spectrometer using CDCl<sub>3</sub> as solvent with TMS or residual solvent as standard unless otherwise noted. <sup>13</sup>C NMR (100 MHz) spectra were reported in ppm with the internal chloroform signal at 77.2 ppm as a standard. Infrared spectra were obtained on a PerkinElmer FT/IR spectrophotometer and relative intensities are expressed qualitatively as s (strong), m (medium), and w (weak). TLC analysis was performed using 254 nm polyester-backed plates and visualized using UV and KMnO<sub>4</sub> stain. High-resolution mass spectra (HRMS) were performed on a Bruker MicrOTOF-Q II mass spectrometer.

### 1.1 Synthesis of *o*-Alkyloxyphenyl-Substituted Ynamides.

*o*-Alkyloxyphenyl-substituted ynamides **1a**<sup>1</sup>, **1f**<sup>2</sup>, **1g**<sup>3</sup>, **1j**<sup>4</sup>, **1l**<sup>5</sup> and **1n**<sup>6</sup> were known compounds and synthesized according to corresponding literatures, the data were matched with reported values. *o*-Alkyloxyphenyl-substituted ynamides **1b**, **1c**, **1d**, **1e**, **1h**, **1i**, **1k**, **1m**, **1o** and **1p** were new compounds and synthesized according to literatures.<sup>1,5</sup>

#### Synthesis of *o*-Alkyloxyphenyl-Substituted Ynamides **1b-1e**, **1h**, **1i**, **1k**, **1o** and **1p**.<sup>1</sup>

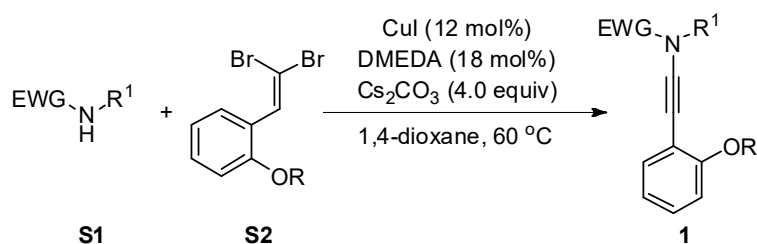

To an oven-dried flask were charged with amide **S1**<sup>7</sup> (832.0 mg, 3.00 mmol), 1,1-dibromo-1-alkene **S2**<sup>8</sup> (583.9 mg, 2.00 mmol), Cs<sub>2</sub>CO<sub>3</sub> (2.6 g, 8.00 mmol), CuI (45.7 mg, 0.24 mmol) and 1,4-dioxane (3.8 mL). Then DMEDA (39.5 μL, 0.36 mmol) was added gradually to the flask. The reaction was stirred at 60 °C for 10.0 h. After the reaction was judged to be complete by TLC, the reaction mixture was cooled to rt and filtered through a short pad of silica gel. Then the filtrate was concentrated in vacuo and purified by flash silica gel column chromatography [gradient eluent: 8:1~4:1 petroleum ether/EtOAc] to afford *o*-anisole-substituted ynamide **1b** (711.6 mg, 1.75 mmol) in 87% yield.

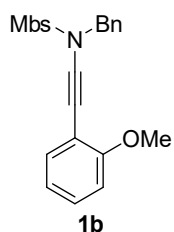

**1b:**  $R_f$  = 0.15 [6:1 petroleum ether/EtOAc]; white solid; mp = 75–76 °C;  $^1\text{H}$  NMR (400 MHz,  $\text{CDCl}_3$ )  $\delta$  7.86 (dt, 2H,  $J$  = 9.0, 3.0 Hz), 7.39–7.36 (m, 2H), 7.30–7.27 (m, 3H), 7.22–7.17 (m, 2H), 6.93 (dt, 2H,  $J$  = 9.0, 3.0 Hz), 6.85–6.79 (m, 2H), 4.59 (s, 2H), 3.84 (s, 3H), 3.80 (s, 3H);  $^{13}\text{C}$  NMR (100 MHz,  $\text{CDCl}_3$ )  $\delta$  163.6, 159.7, 134.7, 132.8, 130.1, 129.4, 129.1, 129.0, 128.5, 128.3, 120.4, 114.2, 112.3, 110.8, 86.8, 67.8, 55.9, 55.81, 55.79; IR (KBr) ( $\text{cm}^{-1}$ ) 3436m, 2937w, 2234m, 1596m, 1496s, 1362s, 1132w; HRMS (ESI):  $m/z$  calcd for  $\text{C}_{24}\text{H}_{26}\text{NO}_5\text{S}$  [ $\text{M} + \text{MeOH} + \text{H}$ ] $^+$ : 440.1526; found 440.1520.

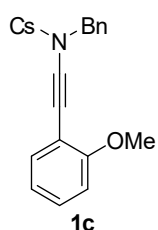

To an oven-dried flask were charged with amide **S1**<sup>9</sup> (845.3 mg, 3.00 mmol), 1,1-dibromo-1-alkene **S2**<sup>8</sup> (584.0 mg, 2.00 mmol),  $\text{Cs}_2\text{CO}_3$  (2.6 g, 8.00 mmol), CuI (45.7 mg, 0.24 mmol) and 1,4-dioxane (3.8 mL). Then DMEDA (39.5  $\mu\text{L}$ , 0.36 mmol) was added gradually to the flask. The reaction was stirred at 60 °C for 10.0 h. After the reaction was judged to be complete by TLC, the reaction mixture was cooled to rt and filtered through a short pad of silica gel. Then the filtrate was concentrated in vacuo and purified by flash silica gel column chromatography [gradient eluent: 10:1~6:1 petroleum ether/EtOAc] to afford *o*-anisole-substituted ynamide **1c** (591.9 mg, 1.44 mmol) in 72% yield.

**1c:**  $R_f$  = 0.39 [6:1 petroleum ether/EtOAc]; white solid; mp = 78–79 °C;  $^1\text{H}$  NMR (400 MHz,  $\text{CDCl}_3$ )  $\delta$  7.83 (dt, 2H,  $J$  = 8.6, 2.6 Hz), 7.42 (dt, 2H,  $J$  = 8.8, 2.5 Hz), 7.38–7.36 (m, 2H), 7.30–7.27 (m, 3H), 7.24–7.20 (m, 2H), 6.88–6.82 (m, 2H), 4.63 (s, 2H), 3.83 (s, 3H);  $^{13}\text{C}$  NMR (100 MHz,  $\text{CDCl}_3$ )  $\delta$  159.9, 140.1, 136.3, 134.4, 133.0, 129.41, 129.36, 129.28, 129.1, 128.6, 128.5, 120.5, 111.9, 110.8, 86.2, 68.1, 56.3, 55.8; IR (KBr) ( $\text{cm}^{-1}$ ) 3442s, 2935w, 2234w, 1495m, 1372s, 1097m; HRMS (ESI):  $m/z$  calcd for  $\text{C}_{23}\text{H}_{23}\text{ClNO}_4\text{S}$  [ $\text{M} + \text{MeOH} + \text{H}$ ] $^+$ : 444.1031; found 444.1029.

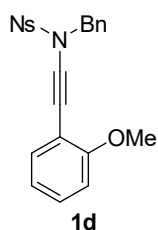

To an oven-dried flask were charged with amide **S1**<sup>7</sup> (876.9 mg, 3.00 mmol), 1,1-dibromo-1-alkene **S2**<sup>8</sup> (583.9 mg, 2.00 mmol),  $\text{Cs}_2\text{CO}_3$  (2.6 g, 8.00 mmol), CuI (45.7 mg, 0.24

mmol) and 1,4-dioxane (3.8 mL). Then DMEDA (39.5  $\mu$ L, 0.36 mmol) was added gradually to the flask. The reaction was stirred at 60  $^{\circ}$ C for 10.0 h. After the reaction was judged to be complete by TLC, the reaction mixture was cooled to rt and filtered through a short pad of silica gel. Then the filtrate was concentrated in vacuo and purified by flash silica gel column chromatography [gradient eluent: 10:1~6:1 petroleum ether/EtOAc] to afford *o*-anisole-substituted ynamide **1d** (405.6 mg, 0.96 mmol) in 48% yield.

**1d**:  $R_f$  = 0.32 [6:1 petroleum ether/EtOAc]; white solid; mp = 119–120  $^{\circ}$ C;  $^1$ H NMR (400 MHz,  $\text{CDCl}_3$ )  $\delta$  8.24 (dt, 2H,  $J$  = 8.9, 2.4 Hz), 8.02 (dt, 2H,  $J$  = 9.0, 2.4 Hz), 7.38–7.35 (m, 2H), 7.29–7.22 (m, 5H), 6.90–6.85 (m, 2H), 4.69 (s, 2H), 3.85 (s, 3H);  $^{13}$ C NMR (100 MHz,  $\text{CDCl}_3$ )  $\delta$  160.1, 150.4, 143.3, 134.0, 133.1, 129.8, 129.14, 129.13, 128.8, 128.7, 124.0, 120.6, 111.5, 110.8, 85.7, 68.4, 56.7, 55.9; IR (KBr) ( $\text{cm}^{-1}$ ) 3442s, 2850w, 2242w, 1588w, 1365s, 1026m, 944w; HRMS (ESI):  $m/z$  calcd for  $\text{C}_{22}\text{H}_{18}\text{N}_2\text{O}_5\text{SNa}$  [ $\text{M} + \text{Na}$ ] $^+$ : 445.0829; found 445.0828.

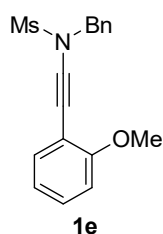

To an oven-dried flask were charged with amide **S1**<sup>10</sup> (555.7 mg, 3.00 mmol), 1,1-dibromo-1-alkene **S2**<sup>8</sup> (583.9 mg, 2.00 mmol),  $\text{Cs}_2\text{CO}_3$  (2.6 g, 8.00 mmol), CuI (45.7 mg, 0.24 mmol) and 1,4-dioxane (3.8 mL). Then DMEDA (39.5  $\mu$ L, 0.36 mmol) was added gradually to the flask. The reaction was stirred at 60  $^{\circ}$ C for 10.0 h. After the reaction was judged to be complete by TLC, the reaction mixture was cooled to rt and filtered through a short pad of silica gel. Then the filtrate was concentrated in vacuo and purified by flash silica gel column chromatography [gradient eluent: 8:1~4:1 petroleum ether/EtOAc] to afford *o*-anisole-substituted ynamide **1e** (554.0 mg, 1.76 mmol) in 88% yield.

**1e**:  $R_f$  = 0.18 [6:1 petroleum ether/EtOAc]; white solid; mp = 62–63  $^{\circ}$ C;  $^1$ H NMR (400 MHz,  $\text{CDCl}_3$ )  $\delta$  7.57–7.55 (m, 2H), 7.42–7.34 (m, 3H), 7.31 (dd, 1H,  $J$  = 7.6, 1.7 Hz), 7.28–7.23 (m, 1H), 6.90–6.84 (m, 2H), 4.72 (s, 2H), 3.85 (s, 3H), 2.91 (s, 3H);  $^{13}$ C NMR (100 MHz,  $\text{CDCl}_3$ )  $\delta$  160.1, 134.8, 133.1, 129.5, 129.3, 128.87, 128.81, 120.5, 111.9, 110.7, 86.1, 68.2, 56.1, 55.9, 38.9; IR (KBr) ( $\text{cm}^{-1}$ ) 3439s, 2242w, 1497m, 1359s, 1162s, 1025m; HRMS (ESI):  $m/z$  calcd for  $\text{C}_{18}\text{H}_{22}\text{NO}_4\text{S}$  [ $\text{M} + \text{MeOH} + \text{H}$ ] $^+$ : 348.1264; found 348.1268.

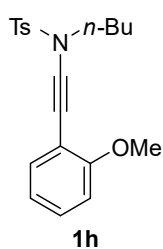

To an oven-dried flask were charged with amide **S1**<sup>11</sup> (628.0 mg, 3.00 mmol), 1,1-dibromo-1-alkene **S2**<sup>8</sup> (583.9 mg, 2.00 mmol), Cs<sub>2</sub>CO<sub>3</sub> (2.6 g, 8.00 mmol), CuI (45.7 mg, 0.24 mmol) and 1,4-dioxane (3.8 mL). Then DMEDA (39.5 μL, 0.36 mmol) was added gradually to the flask. The reaction was stirred at 60 °C for 11.0 h. After the reaction was judged to be complete by TLC, the reaction mixture was cooled to rt and filtered through a short pad of silica gel. Then the filtrate was concentrated in vacuo and purified by flash silica gel column chromatography [gradient eluent: 10:1~6:1 petroleum ether/EtOAc] to afford *o*-anisole-substituted ynamide **1h** (658.8 mg, 1.84 mmol) in 92% yield.

**1h**: *R*<sub>f</sub> = 0.31 [6:1 petroleum ether/EtOAc]; white solid; mp = 44–45 °C; <sup>1</sup>H NMR (400 MHz, CDCl<sub>3</sub>) δ 7.90 (d, 2H, *J* = 8.3 Hz), 7.35–7.31 (m, 3H), 7.25–7.21 (m, 1H), 6.90–6.83 (m, 2H), 3.85 (s, 3H), 3.39 (t, 2H, *J* = 7.2 Hz), 2.44 (s, 3H), 1.75–1.67 (m, 2H), 1.41–1.34 (m, 2H), 0.92 (t, 3H, *J* = 7.3 Hz); <sup>13</sup>C NMR (100 MHz, CDCl<sub>3</sub>) δ 159.8, 144.5, 134.8, 132.9, 129.8, 129.1, 127.9, 120.5, 112.5, 110.8, 86.3, 67.2, 55.8, 51.5, 29.9, 21.8, 19.6, 13.8; IR (KBr) (cm<sup>-1</sup>) 3428s, 2836w, 2236m, 1698w, 1495m, 1362s, 1090m; HRMS (ESI): *m/z* calcd for C<sub>21</sub>H<sub>28</sub>NO<sub>4</sub>S [M + MeOH + H]<sup>+</sup>: 390.1734; found 390.1730.

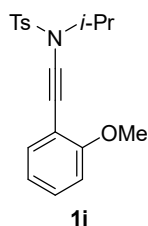

To an oven-dried flask were charged with amide **S1**<sup>12</sup> (639.9 mg, 3.00 mmol), 1,1-dibromo-1-alkene **S2**<sup>8</sup> (583.9 mg, 2.00 mmol), Cs<sub>2</sub>CO<sub>3</sub> (2.6 g, 8.00 mmol), CuI (45.7 mg, 0.24 mmol) and 1,4-dioxane (3.8 mL). Then DMEDA (39.5 μL, 0.36 mmol) was added gradually to the flask. The reaction was stirred at 60 °C for 16.0 h. After the reaction was judged to be complete by TLC, the reaction mixture was cooled to rt and filtered through a short pad of silica gel. Then the filtrate was concentrated in vacuo and purified by flash silica gel column chromatography [gradient eluent: 20:1~15:1 petroleum ether/EtOAc] to afford *o*-anisole-substituted ynamide **1i** (607.0 mg, 1.77 mmol) in 88% yield.

**1i**: *R*<sub>f</sub> = 0.33 [10:1 petroleum ether/EtOAc]; colorless oil; <sup>1</sup>H NMR (400 MHz, CDCl<sub>3</sub>) δ 7.91 (d, 2H, *J* = 8.2 Hz), 7.36–7.31 (m, 3H), 7.26–7.21 (m, 1H), 6.90–6.84 (m, 2H), 4.31–4.21 (m, 1H), 3.86 (s, 3H), 2.43 (s, 3H), 1.17 (d, 6H, *J* = 6.6 Hz); <sup>13</sup>C NMR (100 MHz, CDCl<sub>3</sub>) δ 159.8, 144.4, 136.2, 132.6, 129.8, 128.9, 127.7, 120.5, 112.8, 110.8, 83.4, 69.2, 55.9, 52.9, 21.8, 20.8; IR (KBr) (cm<sup>-1</sup>) 2966w, 2235m, 1705m, 1495s, 1359s, 1246s, 1170s; HRMS (ESI): *m/z* calcd for C<sub>19</sub>H<sub>22</sub>NO<sub>3</sub>S [M+H]<sup>+</sup>: 344.1315; found 344.1315.

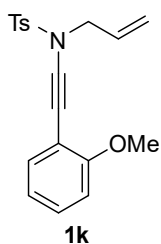

To an oven-dried flask were charged with amide **S1**<sup>13</sup> (633.8 mg, 3.00 mmol), 1,1-dibromo-1-alkene **S2**<sup>8</sup> (583.9 mg, 2.00 mmol), Cs<sub>2</sub>CO<sub>3</sub> (2.6 g, 8.00 mmol), CuI (45.7 mg, 0.24 mmol) and 1,4-dioxane (3.8 mL). Then DMEDA (39.5 μL, 0.36 mmol) was added gradually to the flask. The reaction was stirred at 60 °C for 11.0 h. After the reaction was judged to be complete by TLC, the reaction mixture was cooled to rt and filtered through a short pad of silica gel. Then the filtrate was concentrated in vacuo and purified by flash silica gel column chromatography [gradient eluent: 10:1~6:1 petroleum ether/EtOAc] to afford *o*-anisole-substituted ynamide **1k** (609.8 mg, 1.79 mmol) in 89% yield.

**1k**: *R*<sub>f</sub> = 0.32 [6:1 petroleum ether/EtOAc]; white solid; mp = 100–101 °C; <sup>1</sup>H NMR (400 MHz, CDCl<sub>3</sub>) δ 7.90 (d, 2H, *J* = 8.2 Hz), 7.34 (d, 2H, *J* = 8.0 Hz), 7.30 (dd, 1H, *J* = 7.5, 1.7 Hz), 7.25-7.21 (m, 1H), 6.89-6.83 (m, 2H), 5.86-5.76 (m, 1H), 5.32-5.21 (m, 2H), 4.06 (d, 2H, *J* = 6.4 Hz), 3.85 (s, 3H), 2.44 (s, 3H); <sup>13</sup>C NMR (100 MHz, CDCl<sub>3</sub>) δ 159.9, 144.7, 134.9, 133.1, 131.0, 129.8, 129.2, 128.1, 120.5, 120.2, 112.3, 110.8, 86.2, 67.4, 55.9, 54.6, 21.8; IR (KBr) (cm<sup>-1</sup>) 3445s, 2834w, 2236m, 1597w, 1362s, 1168s, 1022m; HRMS (ESI): *m/z* calcd for C<sub>20</sub>H<sub>24</sub>NO<sub>4</sub>S [M + MeOH + H]<sup>+</sup>: 374.1421; found 374.1419.

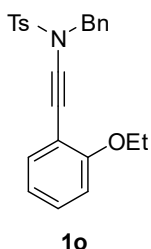

To an oven-dried flask were charged with amide **S1**<sup>7</sup> (1.2 g, 4.50 mmol), 1,1-dibromo-1-alkene **S2**<sup>8</sup> (918.0 mg, 3.00 mmol), Cs<sub>2</sub>CO<sub>3</sub> (3.9 g, 12.00 mmol), CuI (68.6 mg, 0.36 mmol) and 1,4-dioxane (5.6 mL). Then DMEDA (59.3 μL, 0.54 mmol) was added gradually to the flask. The reaction was stirred at 60 °C for 15.0 h. After the reaction was judged to be complete by TLC, the reaction mixture was cooled to rt and filtered through a short pad of silica gel. Then the filtrate was concentrated in vacuo and purified by flash silica gel column chromatography [gradient eluent: 10:1~6:1 petroleum ether/EtOAc] to afford *o*-ethoxyphenyl-substituted ynamide **1o** (1.10 g, 2.71 mmol) in 90% yield.

**1o**: *R*<sub>f</sub> = 0.39 [6:1 petroleum ether/EtOAc]; white solid; mp = 66–67 °C; <sup>1</sup>H NMR (400 MHz, CDCl<sub>3</sub>) δ 7.81 (d, 2H, *J* = 8.4 Hz), 7.38-7.35 (m, 2H), 7.28-7.23 (m, 5H), 7.18-7.12 (m, 2H), 6.81-6.76 (m, 2H), 4.57 (s, 2H), 3.98 (q, 2H, *J* = 7.2 Hz), 2.37 (s, 3H), 1.36 (t, 3H, *J* = 7.2 Hz); <sup>13</sup>C NMR (100 MHz, CDCl<sub>3</sub>) δ 159.0, 144.50, 144.48, 134.8, 134.7, 132.6, 129.6, 128.9, 128.5, 128.2, 127.7, 120.3,

112.4, 111.9, 86.5, 67.9, 64.1, 55.9, 21.6, 14.9; IR (KBr) (cm<sup>-1</sup>) 3442s, 2979w, 2923w, 2236m, 1495m, 1358s; HRMS (ESI): m/z calcd for C<sub>24</sub>H<sub>24</sub>NO<sub>3</sub>S [M + H]<sup>+</sup>: 406.1471; found 406.1466.

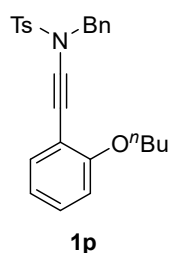

To an oven-dried flask were charged with amide **S1**<sup>7</sup> (1.2 g, 4.50 mmol), 1,1-dibromo-1-alkene **S2**<sup>8</sup> (1.0 g, 3.00 mmol), Cs<sub>2</sub>CO<sub>3</sub> (3.9 g, 12.00 mmol), CuI (68.6 mg, 0.36 mmol) and 1,4-dioxane (5.6 mL). Then DMEDA (59.3 μL, 0.54 mmol) was added gradually to the flask. The reaction was stirred at 60 °C for 13.0 h. After the reaction was judged to be complete by TLC, the reaction mixture was cooled to rt and filtered through a short pad of silica gel. Then the filtrate was concentrated in vacuo and purified by flash silica gel column chromatography [gradient eluent: 12:1~8:1 petroleum ether/EtOAc] to afford *o*-butoxyphenyl-substituted ynamide **1p** (432.0 mg, 1.00 mmol) in 33% yield.

**1p**: *R*<sub>f</sub> = 0.46 [6:1 petroleum ether/EtOAc]; colorless oil; <sup>1</sup>H NMR (400 MHz, CDCl<sub>3</sub>) δ 7.79 (d, 2H, *J* = 8.0 Hz), 7.36-7.34 (m, 2H), 7.28-7.22 (m, 5H), 7.19-7.13 (m, 2H), 6.81-6.76 (m, 2H), 4.57 (s, 2H), 3.91 (t, 2H, *J* = 6.4 Hz), 2.36 (s, 3H), 1.75-1.68 (m, 2H), 1.48-1.39 (m, 2H), 0.90 (t, 3H, *J* = 7.2 Hz); <sup>13</sup>C NMR (100 MHz, CDCl<sub>3</sub>) δ 159.1, 144.4, 134.9, 134.7, 132.7, 129.6, 128.9, 128.8, 128.4, 128.2, 127.7, 120.1, 112.4, 111.7, 86.4, 68.2, 67.7, 55.9, 31.3, 21.6, 19.2, 13.9; IR (KBr) (cm<sup>-1</sup>) 3449s, 2958m, 2870w, 2234m, 1597w, 1365s; HRMS (ESI): m/z calcd for C<sub>26</sub>H<sub>28</sub>NO<sub>3</sub>S [M + H]<sup>+</sup>: 434.1784; found 434.1775.

### Synthesis of *o*-Anisole-Substituted Ynamide **1m**.

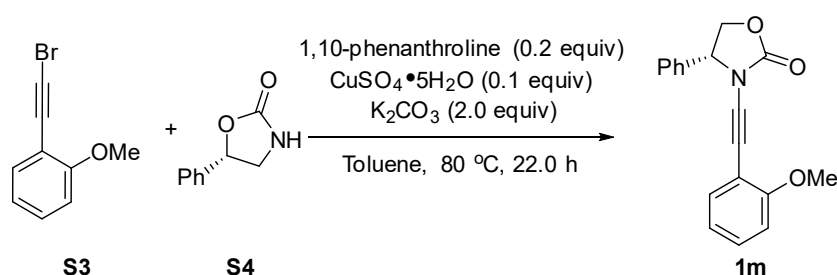

To an oven-dried flask were charged with alkynyl bromide **S3**<sup>12</sup> (253.2 mg, 1.20 mmol), amide **S4** (163.2 mg, 1.00 mmol), CuSO<sub>4</sub>·5H<sub>2</sub>O (25.0 mg, 0.10 mmol), 1,10-phenanthroline (36.0 mg, 0.20 mmol) and K<sub>2</sub>CO<sub>3</sub> (276.4 mg, 2.00 mmol), toluene (6.0 mL). The reaction was stirred at 80 °C for 22.0 h. After the reaction was judged to be complete by TLC, the reaction mixture was cooled to rt and filtered through a short pad of silica gel. Then the filtrate was concentrated in vacuo and purified by flash silica gel column chromatography [gradient eluent: 4:1~2:1 petroleum ether/EtOAc] to afford *o*-anisole-substituted ynamide **1m** (275.2 mg, 0.94 mmol) in 94% yield.

**1m:**  $R_f = 0.37$  [2:1 petroleum ether/EtOAc]; white solid; mp = 110–111 °C;  $^1\text{H NMR}$  (400 MHz,  $\text{CDCl}_3$ )  $\delta$  7.46-7.39 (m, 5H), 7.23-7.19 (m, 2H), 6.83-6.76 (m, 2H), 5.16 (dd, 1H,  $J = 8.8, 7.1$  Hz), 4.77 (t, 1H,  $J = 8.8$  Hz), 4.31 (dd, 1H,  $J = 9.0, 7.1$  Hz), 3.72 (s, 3H);  $^{13}\text{C NMR}$  (100 MHz,  $\text{CDCl}_3$ )  $\delta$  160.0, 155.6, 136.3, 133.6, 129.7, 129.5, 129.3, 127.2, 120.4, 111.5, 110.8, 81.8, 70.9, 69.3, 62.4, 55.8; IR (KBr) ( $\text{cm}^{-1}$ ) 2965w, 2255w, 1757s, 1497m, 1252m, 1116m; HRMS (ESI):  $m/z$  calcd for  $\text{C}_{19}\text{H}_{20}\text{NO}_4$  [ $\text{M} + \text{MeOH} + \text{H}$ ] $^+$ : 294.1125; found 294.1119.

## 1.2 Optimization of the Intermolecular Reaction (Table S1).

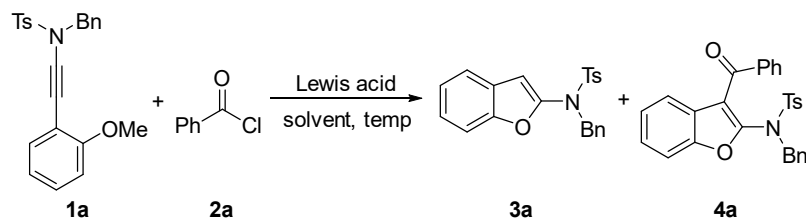

| Entry <sup>a</sup> | Catalyst (equiv)                          | Solvent                         | Temp (°C) | Time (h) | Yield <sup>b</sup> (%) |    |
|--------------------|-------------------------------------------|---------------------------------|-----------|----------|------------------------|----|
|                    |                                           |                                 |           |          | 3a                     | 4a |
| 1                  | BF <sub>3</sub> ·Et <sub>2</sub> O (0.15) | CH <sub>2</sub> Cl <sub>2</sub> | 30        | 11.0     | 19                     | 56 |
| 2                  | AlCl <sub>3</sub> (0.15)                  | CH <sub>2</sub> Cl <sub>2</sub> | 30        | 10.0     | 5                      | 48 |
| 3                  | FeCl <sub>3</sub> (0.15)                  | CH <sub>2</sub> Cl <sub>2</sub> | 30        | 3.0      | 7                      | 78 |
| 4                  | ZnCl <sub>2</sub> (0.15)                  | CH <sub>2</sub> Cl <sub>2</sub> | 30        | 10.0     | 23                     | 74 |
| 5                  | ZnBr <sub>2</sub> (0.15)                  | CH <sub>2</sub> Cl <sub>2</sub> | 30        | 6.0      | 34                     | 50 |
| 6                  | SnCl <sub>4</sub> (0.15)                  | CH <sub>2</sub> Cl <sub>2</sub> | 30        | 12.0     | 10                     | 86 |
| 7                  | SnCl <sub>4</sub> (0.15)                  | DCE                             | 30        | 5.0      | 7                      | 87 |
| 8                  | SnCl <sub>4</sub> (0.15)                  | toluene                         | 30        | 27.0     | 7                      | 28 |
| 9                  | SnCl <sub>4</sub> (0.15)                  | THF                             | 30        | 11.0     | 31                     | 0  |
| 10                 | SnCl <sub>4</sub> (0.15)                  | EtOAc                           | 30        | 32.0     | 43                     | 0  |
| 11                 | SnCl <sub>4</sub> (0.3)                   | DCE                             | 30        | 4.0      | 4                      | 91 |
| 12                 | SnCl <sub>4</sub> (0.3)                   | DCE                             | 50        | 2.5      | 0                      | 97 |
| 13                 | SnCl <sub>4</sub> (0.3)                   | DCE                             | 70        | 0.5      | 0                      | 85 |
| 14 <sup>c</sup>    | SnCl <sub>4</sub> (0.3)                   | DCE                             | 50        | 3.0      | 13                     | 82 |
| 15 <sup>d</sup>    | SnCl <sub>4</sub> (0.3)                   | DCE                             | 50        | 3.5      | 9                      | 69 |
| 16 <sup>e</sup>    | SnCl <sub>4</sub> (0.3)                   | DCE                             | 50        | 2.5      | 0                      | 96 |

<sup>a</sup>Unless otherwise specified, reactions were carried out using **1a** (0.20 mmol), **2a** (0.40 mmol) with catalyst in solvent (2.0 mL). <sup>b</sup>Isolated yields. <sup>c</sup>1.5 equiv of **2a** was used.

<sup>d</sup>1.2 equiv of **2a** was used. <sup>e</sup>**1a** (1.00 mmol) and **2a** (2.00 mmol) were added.

Entry 16: To an oven-dried sealed tube was added *o*-anisole-substituted ynamide **1a** (391.5 mg, 1.00 mmol), acyl chloride **2a** (232.0  $\mu\text{L}$ , 2.00 mmol), DCE (10.0 mL, ynamide *concn* = 0.10 M), and SnCl<sub>4</sub> (300.0  $\mu\text{L}$ , 0.30 mmol, 1.0 M in CH<sub>2</sub>Cl<sub>2</sub>) at 50 °C. The reaction vessel was capped and stirred at 50 °C for 2.5 h. After the reaction was judged to be complete by TLC, the reaction mixture was cooled to rt and filtered through a short pad of silica gel. Then the filtrate was concentrated in vacuo and purified by flash silica gel column chromatography [gradient eluent: 10:1~6:1 petroleum



ether/EtOAc] to afford 3-acyl-2-amidobenzofuran **4a** (461.8 mg, 0.96 mmol) in 96% yield.

### 1.3 Cyclization of *o*-Anisole-Substituted Ynamides with Acyl Chlorides.

3-Acyl-2-amidobenzofurans **4a-4mm** were new compounds.

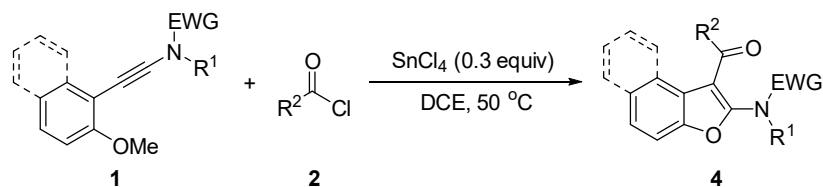

To an oven-dried sealed tube was added *o*-anisole-substituted ynamide **1a** (78.3 mg, 0.20 mmol), acyl chloride **2a** (46.4 μL, 0.40 mmol), DCE (2.0 mL, ynamide *concn* = 0.10 M), and SnCl<sub>4</sub> (60.0 μL, 0.06 mmol, 1.0 M in CH<sub>2</sub>Cl<sub>2</sub>) at 50 °C. The reaction vessel was capped and stirred at 50 °C for 2.5 h. After the reaction was judged to be complete by TLC, the reaction mixture was cooled to rt and filtered through a short pad of silica gel. Then the filtrate was concentrated in vacuo and purified by flash silica gel column chromatography [gradient eluent: 10:1~6:1 petroleum ether/EtOAc] to afford 3-acyl-2-amidobenzofuran **4a** (93.5 mg, 0.19 mmol) in 97% yield.

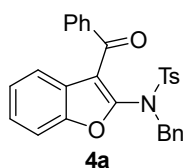

**4a**:  $R_f$  = 0.31 [6:1 petroleum ether/EtOAc]; white solid; mp = 136–137 °C; <sup>1</sup>H NMR (400 MHz, CDCl<sub>3</sub>) δ 7.60 (d, 2H,  $J$  = 8.2 Hz), 7.59-7.53 (m, 3H), 7.41 (d, 2H,  $J$  = 8.5 Hz), 7.36-7.29 (m, 3H), 7.24-7.15 (m, 8H), 4.77 (s, 2H), 2.34 (s, 3H); <sup>13</sup>C NMR (100 MHz, CDCl<sub>3</sub>) δ 190.1, 151.5, 149.1, 144.6, 137.9, 135.3, 134.4, 132.9, 129.9, 129.6, 129.4, 128.6, 128.4, 128.0, 126.8, 125.8, 124.0, 122.0, 115.6, 111.3, 54.2, 21.7, one carbon missing due to overlap, overlapped signal at 128.4 ppm; IR (KBr) (cm<sup>-1</sup>) 3448s, 2926w, 1568m, 1362s, 1177m, 1096w; HRMS (ESI):  $m/z$  calcd for C<sub>29</sub>H<sub>24</sub>NO<sub>4</sub>S [M + H]<sup>+</sup>: 482.1421; found 482.1424.

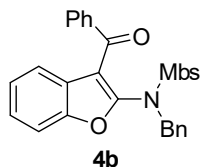

To an oven-dried sealed tube was added *o*-anisole-substituted ynamide **1b** (81.5 mg, 0.20 mmol), acyl chloride **2a** (46.4 μL, 0.40 mmol), DCE (2.0 mL, ynamide *concn* = 0.10 M), and SnCl<sub>4</sub> (60.0 μL, 0.06 mmol, 1.0 M in CH<sub>2</sub>Cl<sub>2</sub>) at 50 °C. The reaction vessel was capped and stirred at 50 °C for 1.0 h. After the reaction was judged to be complete by TLC, the reaction mixture was cooled to rt and filtered through a short pad of silica gel. Then the filtrate was concentrated in vacuo and purified by flash silica gel column chromatography [gradient eluent: 8:1~4:1 petroleum ether/EtOAc] to afford 3-acyl-2-amidobenzofuran **4b** (87.3 mg, 0.18 mmol) in 88% yield.

**4b**:  $R_f$  = 0.18 [6:1 petroleum ether/EtOAc]; white solid; mp = 120–121 °C;  $^1\text{H}$  NMR (400 MHz,  $\text{CDCl}_3$ )  $\delta$  7.65 (dt, 2H,  $J$  = 9.0, 3.0 Hz), 7.59-7.53 (m, 3H), 7.43-7.40 (m, 2H), 7.37-7.29 (m, 3H), 7.21-7.18 (m, 6H), 6.84 (dt, 2H,  $J$  = 9.0, 3.0 Hz), 4.76 (s, 2H), 3.78 (s, 3H);  $^{13}\text{C}$  NMR (100 MHz,  $\text{CDCl}_3$ )  $\delta$  190.1, 163.6, 151.5, 149.3, 137.9, 134.4, 132.9, 130.3, 129.74, 129.67, 129.4, 128.7, 128.41, 128.38, 126.9, 125.8, 124.0, 122.1, 115.6, 114.4, 111.3, 55.8, 54.1; IR (KBr) ( $\text{cm}^{-1}$ ) 3442s, 2924w, 1499m, 1159s, 1026w; HRMS (ESI):  $m/z$  calcd for  $\text{C}_{29}\text{H}_{24}\text{NO}_5\text{S}$  [ $\text{M} + \text{H}$ ] $^+$ :498.1370; found 498.1371.

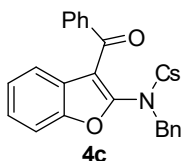

To an oven-dried sealed tube was added *o*-anisole-substituted ynamide **1c** (82.4 mg, 0.20 mmol), acyl chloride **2a** (46.4  $\mu\text{L}$ , 0.40 mmol), DCE (2.0 mL, ynamide *concn* = 0.10 M), and  $\text{SnCl}_4$  (60.0  $\mu\text{L}$ , 0.06 mmol, 1.0 M in  $\text{CH}_2\text{Cl}_2$ ) at 50 °C. The reaction vessel was capped and stirred at 50 °C for 9.0 h. After the reaction was judged to be complete by TLC, the reaction mixture was cooled to rt and filtered through a short pad of silica gel. Then the filtrate was concentrated in vacuo and purified by flash silica gel column chromatography [gradient eluent: 10:1~6:1 petroleum ether/EtOAc] to afford 3-acetyl-2-amidobenzofuran **4c** (96.0 mg, 0.19 mmol) in 96% yield.

**4c**:  $R_f$  = 0.38 [6:1 petroleum ether/EtOAc]; white solid; mp = 112-113 °C;  $^1\text{H}$  NMR (400 MHz,  $\text{CDCl}_3$ )  $\delta$  7.65 (dt, 2H,  $J$  = 8.6, 2.6 Hz), 7.60-7.55 (m, 3H), 7.43 (d, 1H,  $J$  = 8.3 Hz), 7.40-7.31 (s, 6H), 7.22-7.18 (m, 6H), 4.79 (s, 2H);  $^{13}\text{C}$  NMR (100 MHz,  $\text{CDCl}_3$ )  $\delta$  189.9, 151.5, 148.9, 140.2, 137.7, 137.0, 134.1, 133.2, 129.6, 129.5, 129.44, 129.39, 128.7, 128.5, 126.6, 126.0, 124.2, 122.1, 116.0, 111.4, 54.7, one carbon missing due to overlap, overlapped signal at 128.5 ppm; IR (KBr) ( $\text{cm}^{-1}$ ) 3441s, 3088w, 1651s, 1362s, 1167m, 893m; HRMS (ESI):  $m/z$  calcd for  $\text{C}_{28}\text{H}_{21}\text{ClNO}_4\text{S}$  [ $\text{M} + \text{H}$ ] $^+$ : 502.0874; found 502.0875.

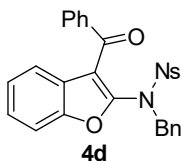

To an oven-dried sealed tube was added *o*-anisole-substituted ynamide **1d** (84.5 mg, 0.20 mmol), acyl chloride **2a** (46.4  $\mu\text{L}$ , 0.40 mmol), DCE (2.0 mL, ynamide *concn* = 0.10 M), and  $\text{SnCl}_4$  (60.0  $\mu\text{L}$ , 0.06 mmol, 1.0 M in  $\text{CH}_2\text{Cl}_2$ ) at 50 °C. The reaction vessel was capped and stirred at 50 °C for 11.5 h. After the reaction was judged to be complete by TLC, the reaction mixture was cooled to rt and filtered through a short pad of silica gel. Then the filtrate was concentrated in vacuo and purified by flash silica gel column chromatography [gradient eluent: 10:1~6:1 petroleum ether/EtOAc] to afford 3-acetyl-2-amidobenzofuran **4d** (99.4 mg, 0.19 mmol) in 97% yield.

**4d**:  $R_f$  = 0.31 [6:1 petroleum ether/EtOAc]; white solid; mp = 150–151 °C;  $^1\text{H}$  NMR (400 MHz,

CDCl<sub>3</sub>)  $\delta$  8.13 (dt, 2H,  $J$  = 8.9, 2.2 Hz), 7.87 (dt, 2H,  $J$  = 8.9, 2.4 Hz), 7.61-7.57 (m, 3H), 7.44 (d, 1H,  $J$  = 8.3 Hz), 7.40-7.31 (m, 4H), 7.24-7.17 (m, 6H), 4.89 (s, 2H); <sup>13</sup>C NMR (100 MHz, CDCl<sub>3</sub>)  $\delta$  189.6, 151.5, 150.3, 148.6, 144.3, 137.4, 133.9, 133.5, 129.6, 129.3, 129.2, 128.8, 128.63, 128.56, 126.3, 126.2, 124.29, 124.27, 122.1, 116.4, 111.6, 55.7; IR (KBr) (cm<sup>-1</sup>) 3441s, 2850w, 1652s, 1449m, 1241m, 1061w; HRMS (ESI):  $m/z$  calcd for C<sub>28</sub>H<sub>21</sub>N<sub>2</sub>O<sub>6</sub>S [M+H]<sup>+</sup>: 513.1115; found 513.1118.

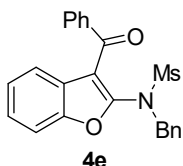

To an oven-dried sealed tube was added *o*-anisole-substituted ynamide **1e** (63.1 mg, 0.20 mmol), acyl chloride **2a** (46.4  $\mu$ L, 0.40 mmol), DCE (2.0 mL, ynamide *concn* = 0.10 M), and SnCl<sub>4</sub> (60.0  $\mu$ L, 0.06 mmol, 1.0 M in CH<sub>2</sub>Cl<sub>2</sub>) at 50 °C. The reaction vessel was capped and stirred at 50 °C for 9.0 h. After the reaction was judged to be complete by TLC, the reaction mixture was cooled to rt and filtered through a short pad of silica gel. Then the filtrate was concentrated in vacuo and purified by flash silica gel column chromatography [gradient eluent: 8:1~4:1 petroleum ether/EtOAc] to afford 3-acyl-2-amidobenzofuran **4e** (76.8 mg, 0.19 mmol) in 95% yield.

**4e**:  $R_f$  = 0.21 [6:1 petroleum ether/EtOAc]; colorless oil; <sup>1</sup>H NMR (400 MHz, CDCl<sub>3</sub>)  $\delta$  7.70-7.68 (m, 2H), 7.62-7.58 (m, 1H), 7.48 (d, 1H,  $J$  = 8.3 Hz), 7.45-7.41 (m, 2H), 7.36-7.30 (m, 2H), 7.25-7.18 (m, 6H), 4.80 (s, 2H), 3.08 (s, 3H); <sup>13</sup>C NMR (100 MHz, CDCl<sub>3</sub>)  $\delta$  190.5, 151.5, 150.6, 138.0, 134.5, 133.4, 129.6, 129.1, 128.9, 128.6, 126.4, 126.0, 124.2, 122.1, 114.7, 111.6, 55.1, 41.4, one carbon missing due to overlap, overlapped signal at 128.6 ppm; IR (KBr) (cm<sup>-1</sup>) 3450s, 2925w, 1675m, 1654m, 1160m, 1602w; HRMS (ESI):  $m/z$  calcd for C<sub>23</sub>H<sub>20</sub>NO<sub>4</sub>S [M+H]<sup>+</sup>: 406.1108; found 406.1107.

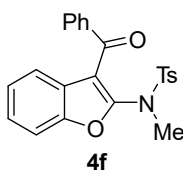

To an oven-dried sealed tube was added *o*-anisole-substituted ynamide **1f** (63.1 mg, 0.20 mmol), acyl chloride **2a** (46.4  $\mu$ L, 0.40 mmol), DCE (2.0 mL, ynamide *concn* = 0.10 M), and SnCl<sub>4</sub> (60.0  $\mu$ L, 0.06 mmol, 1.0 M in CH<sub>2</sub>Cl<sub>2</sub>) at 50 °C. The reaction vessel was capped and stirred at 50 °C for 3.0 h. After the reaction was judged to be complete by TLC, the reaction mixture was cooled to rt and filtered through a short pad of silica gel. Then the filtrate was concentrated in vacuo and purified by flash silica gel column chromatography [gradient eluent: 10:1~6:1 petroleum ether/EtOAc] to afford 3-acyl-2-amidobenzofuran **4f** (73.7 mg, 0.18 mmol) in 91% yield.

**4f**:  $R_f$  = 0.29 [6:1 petroleum ether/EtOAc]; white solid; mp = 129–130 °C; <sup>1</sup>H NMR (400 MHz, CDCl<sub>3</sub>)  $\delta$  7.86-7.83 (m, 2H), 7.70 (d, 1H,  $J$  = 7.6 Hz), 7.63-7.59 (m, 1H), 7.53 (d, 2H,  $J$  = 8.4 Hz),

7.51-7.47 (m, 2H), 7.42-7.40 (m, 1H), 7.36 (td, 1H,  $J = 7.0, 1.4$  Hz), 7.31-7.27 (m, 1H), 7.19 (d, 2H,  $J = 8.1$  Hz), 3.19 (s, 3H), 2.37 (s, 3H);  $^{13}\text{C}$  NMR (100 MHz,  $\text{CDCl}_3$ )  $\delta$  190.5, 151.5, 150.8, 144.6, 138.2, 134.5, 133.0, 129.9, 129.5, 128.4, 127.9, 126.7, 125.9, 124.3, 122.2, 114.2, 111.3, 37.1, 21.7; IR (KBr) ( $\text{cm}^{-1}$ ) 3430s, 2844w, 1654s, 1449s, 1235w, 1169s; HRMS (ESI):  $m/z$  calcd for  $\text{C}_{23}\text{H}_{20}\text{NO}_4\text{S}$   $[\text{M}+\text{H}]^+$ : 406.1108; found 406.1109.

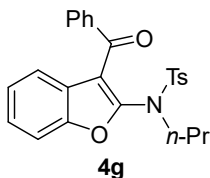

To an oven-dried sealed tube was added *o*-anisole-substituted ynamide **1g**<sup>3</sup> (68.7 mg, 0.20 mmol), acyl chloride **2a** (46.4  $\mu\text{L}$ , 0.40 mmol), DCE (2.0 mL, ynamide *concn* = 0.10 *M*), and  $\text{SnCl}_4$  (60.0  $\mu\text{L}$ , 0.06 mmol, 1.0 *M* in  $\text{CH}_2\text{Cl}_2$ ) at 50  $^\circ\text{C}$ . The reaction vessel was capped and stirred at 50  $^\circ\text{C}$  for 2.5 h. After the reaction was judged to be complete by TLC, the reaction mixture was cooled to rt and filtered through a short pad of silica gel. Then the filtrate was concentrated in vacuo and purified by flash silica gel column chromatography [gradient eluent: 20:1~15:1 petroleum ether/EtOAc] to afford 3-acyl-2-amidobenzofuran **4g** (78.8 mg, 0.18 mmol) in 91% yield.

**4g**:  $R_f = 0.35$  [10:1 petroleum ether/EtOAc]; white solid; mp = 89–90  $^\circ\text{C}$ ;  $^1\text{H}$  NMR (400 MHz,  $\text{CDCl}_3$ )  $\delta$  7.86-7.83 (m, 2H), 7.63-7.58 (m, 3H), 7.49-7.42 (m, 4H), 7.39-7.34 (m, 1H), 7.26-7.22 (m, 1H), 7.15 (d, 2H,  $J = 8.0$  Hz), 3.59-3.56 (m, 2H), 2.33 (s, 3H), 1.63-1.55 (m, 2H), 0.87 (t, 3H,  $J = 7.3$  Hz);  $^{13}\text{C}$  NMR (100 MHz,  $\text{CDCl}_3$ )  $\delta$  190.3, 151.6, 149.6, 144.3, 138.0, 135.7, 133.3, 129.83, 129.82, 128.5, 127.9, 126.8, 125.9, 124.1, 122.0, 116.2, 111.5, 52.9, 22.1, 21.7, 11.3; IR (KBr) ( $\text{cm}^{-1}$ ) 3438w, 1649s, 1597s, 1448s, 1358s, 1234m, 1172s, 1107m; HRMS (ESI):  $m/z$  calcd for  $\text{C}_{25}\text{H}_{24}\text{NO}_4\text{S}$   $[\text{M}+\text{H}]^+$ : 434.1421; found 434.1422.

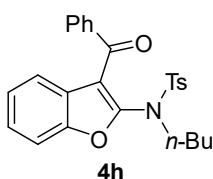

To an oven-dried sealed tube was added *o*-anisole-substituted ynamide **1h** (71.5 mg, 0.20 mmol), acyl chloride **2a** (46.4  $\mu\text{L}$ , 0.40 mmol), DCE (2.0 mL, ynamide *concn* = 0.10 *M*), and  $\text{SnCl}_4$  (60.0  $\mu\text{L}$ , 0.06 mmol, 1.0 *M* in  $\text{CH}_2\text{Cl}_2$ ) at 50  $^\circ\text{C}$ . The reaction vessel was capped and stirred at 50  $^\circ\text{C}$  for 4.5 h. After the reaction was judged to be complete by TLC, the reaction mixture was cooled to rt and filtered through a short pad of silica gel. Then the filtrate was concentrated in vacuo and purified by flash silica gel column chromatography [gradient eluent: 10:1~6:1 petroleum ether/EtOAc] to afford 3-acyl-2-amidobenzofuran **4h** (80.2 mg, 0.18 mmol) in 90% yield.

**4h**:  $R_f = 0.35$  [6:1 petroleum ether/EtOAc]; colorless oil;  $^1\text{H}$  NMR (400 MHz,  $\text{CDCl}_3$ )  $\delta$  7.86-7.83 (m, 2H), 7.63-7.58 (m, 3H), 7.49-7.42 (m, 4H), 7.36 (td, 1H,  $J = 7.2, 1.3$  Hz), 7.26-7.24 (m, 1H), 7.14 (d,

2H,  $J = 8.1$  Hz), 3.61 (t, 2H,  $J = 7.6$  Hz), 2.32 (s, 3H), 1.59-1.51 (m, 2H), 1.32-1.26 (m, 2H), 0.84 (t, 3H,  $J = 7.4$  Hz);  $^{13}\text{C}$  NMR (100 MHz,  $\text{CDCl}_3$ )  $\delta$  190.3, 151.6, 149.6, 144.3, 138.0, 135.6, 133.2, 129.81, 129.79, 128.5, 127.9, 126.8, 125.9, 124.1, 122.0, 116.2, 111.5, 51.0, 30.8, 21.7, 19.9, 13.8; IR (KBr) ( $\text{cm}^{-1}$ ) 3435s, 3608w, 2928m, 1167s, 1606s, 1449w; HRMS (ESI):  $m/z$  calcd for  $\text{C}_{26}\text{H}_{26}\text{NO}_4\text{S}$   $[\text{M}+\text{H}]^+$ : 448.1577; found 448.1577.

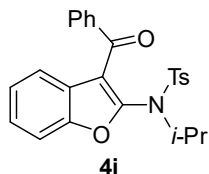

To an oven-dried sealed tube was added *o*-anisole-substituted ynamide **1i** (68.7 mg, 0.20 mmol), acyl chloride **2a** (46.4  $\mu\text{L}$ , 0.40 mmol), DCE (2.0 mL, ynamide *concn* = 0.10 *M*), and  $\text{SnCl}_4$  (60.0  $\mu\text{L}$ , 0.06 mmol, 1.0 *M* in  $\text{CH}_2\text{Cl}_2$ ) at 50  $^\circ\text{C}$ . The reaction vessel was capped and stirred at 50  $^\circ\text{C}$  for 4.0 h. After the reaction was judged to be complete by TLC, the reaction mixture was cooled to rt and filtered through a short pad of silica gel. Then the filtrate was concentrated in vacuo and purified by flash silica gel column chromatography [gradient eluent: 20:1~15:1 petroleum ether/EtOAc] to afford 3-acyl-2-amidobenzofuran **4i** (67.3 mg, 0.16 mmol) in 78% yield.

**4i**:  $R_f = 0.37$  [10:1 petroleum ether/EtOAc]; white solid; mp = 120–121  $^\circ\text{C}$ ;  $^1\text{H}$  NMR (400 MHz,  $\text{CDCl}_3$ )  $\delta$  7.95-7.92 (m, 2H), 7.79 (d, 2H,  $J = 8.3$  Hz), 7.64-7.60 (m, 1H), 7.52-7.46 (m, 3H), 7.41-7.36 (m, 2H), 7.26-7.22 (m, 3H), 4.22-4.12 (m, 1H), 2.37 (s, 3H), 1.09 (d, 6H,  $J = 6.7$  Hz);  $^{13}\text{C}$  NMR (100 MHz,  $\text{CDCl}_3$ )  $\delta$  190.3, 151.8, 146.9, 144.2, 137.8, 136.7, 133.5, 130.1, 129.8, 128.6, 128.3, 126.7, 126.1, 123.9, 122.0, 119.2, 111.7, 54.2, 21.9, 21.7; IR (KBr) ( $\text{cm}^{-1}$ ) 3442w, 1653s, 1597s, 1451s, 1342s, 1231m, 1123m; HRMS (ESI):  $m/z$  calcd for  $\text{C}_{25}\text{H}_{24}\text{NO}_4\text{S}$   $[\text{M}+\text{H}]^+$ : 434.1421; found 434.1424.

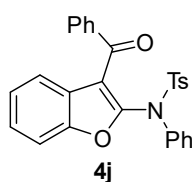

To an oven-dried sealed tube was added *o*-anisole-substituted ynamide **1j**<sup>3</sup> (75.5 mg, 0.20 mmol), acyl chloride **2a** (46.4  $\mu\text{L}$ , 0.40 mmol), DCE (2.0 mL, ynamide *concn* = 0.10 *M*), and  $\text{SnCl}_4$  (60.0  $\mu\text{L}$ , 0.06 mmol, 1.0 *M* in  $\text{CH}_2\text{Cl}_2$ ) at 50  $^\circ\text{C}$ . The reaction vessel was capped and stirred at 50  $^\circ\text{C}$  for 3.5 h. After the reaction was judged to be complete by TLC, the reaction mixture was cooled to rt and filtered through a short pad of silica gel. Then the filtrate was concentrated in vacuo and purified by flash silica gel column chromatography [gradient eluent: 10:1~6:1 petroleum ether/EtOAc] to afford 3-acyl-2-amidobenzofuran **4j** (63.7 mg, 0.14 mmol) in 68% yield.

**4j**:  $R_f = 0.43$  [6:1 petroleum ether/EtOAc]; white solid, mp = 200–201  $^\circ\text{C}$ ;  $^1\text{H}$  NMR (400 MHz,  $\text{CDCl}_3$ )  $\delta$  7.92-7.89 (m, 2H), 7.72-7.66 (m, 2H), 7.56-7.52 (m, 4H), 7.48 (d, 1H,  $J = 8.2$  Hz), 7.39 (td, 1H,  $J = 7.2, 1.4$  Hz), 7.30 (td, 1H,  $J = 7.8, 1.2$  Hz), 7.23-7.15 (m, 5H), 6.91-6.88 (m, 2H), 2.41 (s,

3H);  $^{13}\text{C}$  NMR (100 MHz,  $\text{CDCl}_3$ )  $\delta$  190.5, 151.8, 150.6, 144.7, 138.8, 138.4, 135.3, 133.3, 129.9, 129.6, 129.2, 128.69, 128.65, 128.60, 126.8, 126.2, 124.4, 122.5, 115.1, 111.4, 21.8, one carbon missing due to overlap, overlapped signal at 128.69 ppm; IR (KBr) ( $\text{cm}^{-1}$ ) 3442s, 2847w, 1664s, 1453m, 1241m, 1167s, 1072w; HRMS (ESI):  $m/z$  calcd for  $\text{C}_{28}\text{H}_{22}\text{NO}_4\text{S}$   $[\text{M}+\text{H}]^+$ : 468.1264; found 468.1264.

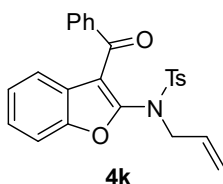

To an oven-dried sealed tube was added *o*-anisole-substituted ynamide **1k** (68.3 mg, 0.20 mmol), acyl chloride **2a** (46.4  $\mu\text{L}$ , 0.40 mmol), DCE (2.0 mL, ynamide *concn* = 0.10 M), and  $\text{SnCl}_4$  (60.0  $\mu\text{L}$ , 0.06 mmol, 1.0 M in  $\text{CH}_2\text{Cl}_2$ ) at 50  $^\circ\text{C}$ . The reaction vessel was capped and stirred at 50  $^\circ\text{C}$  for 4.0 h. After the reaction was judged to be complete by TLC, the reaction mixture was cooled to rt and filtered through a short pad of silica gel. Then the filtrate was concentrated in vacuo and purified by flash silica gel column chromatography [gradient eluent: 10:1~6:1 petroleum ether/EtOAc] to afford 3-acyl-2-amidobenzofuran **4k** (45.5 mg, 0.11 mmol) in 53% yield.

**4k**:  $R_f$  = 0.37 [6:1 petroleum ether/EtOAc]; white solid; mp = 100-101  $^\circ\text{C}$ ;  $^1\text{H}$  NMR (400 MHz,  $\text{CDCl}_3$ )  $\delta$  7.85-7.83 (m, 2H), 7.63-7.59 (m, 3H), 7.51-7.43 (m, 4H), 7.36 (td, 1H,  $J$  = 7.2, 1.4 Hz), 7.27-7.23 (m, 1H), 7.17 (d, 2H,  $J$  = 8.0 Hz), 5.85-5.75 (m, 1H), 5.20 (dd, 1H,  $J$  = 17.1, 1.4 Hz), 5.11 (dd, 1H,  $J$  = 10.1, 1.2 Hz), 4.22 (d, 2H,  $J$  = 6.7 Hz), 2.35 (s, 3H);  $^{13}\text{C}$  NMR (100 MHz,  $\text{CDCl}_3$ )  $\delta$  190.3, 151.6, 149.6, 144.5, 138.1, 135.5, 133.2, 131.8, 129.9, 129.8, 128.5, 128.0, 126.7, 125.9, 124.1, 122.2, 126.5, 116.0, 111.5, 53.6, 21.7; IR (KBr) ( $\text{cm}^{-1}$ ) 3442s, 2850w, 1649s, 1448m, 1168s, 1059w; HRMS (ESI):  $m/z$  calcd for  $\text{C}_{25}\text{H}_{22}\text{NO}_4\text{S}$   $[\text{M}+\text{H}]^+$ : 432.1264; found 432.1264.

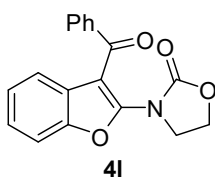

To an oven-dried sealed tube was added *o*-anisole-substituted ynamide **1l** (43.4 mg, 0.20 mmol), acyl chloride **2a** (46.4  $\mu\text{L}$ , 0.40 mmol), DCE (2.0 mL, ynamide *concn* = 0.10 M), and  $\text{SnCl}_4$  (60.0  $\mu\text{L}$ , 0.06 mmol, 1.0 M in  $\text{CH}_2\text{Cl}_2$ ) at 50  $^\circ\text{C}$ . The reaction vessel was capped and stirred at 50  $^\circ\text{C}$  for 1.5 h. After the reaction was judged to be complete by TLC, the reaction mixture was cooled to rt and filtered through a short pad of silica gel. Then the filtrate was concentrated in vacuo and purified by flash silica gel column chromatography [gradient eluent: 4:1~2:1 petroleum ether/EtOAc] to afford 3-acyl-2-amidobenzofuran **4l** (55.4 mg, 0.18 mmol) in 90% yield.

**4l**:  $R_f$  = 0.19 [2:1 petroleum ether/EtOAc]; white solid, mp = 178-179  $^\circ\text{C}$ ;  $^1\text{H}$  NMR (400 MHz,  $\text{CDCl}_3$ )  $\delta$  7.87-7.84 (m, 2H), 7.61-7.53 (m, 2H), 7.50-7.46 (m, 3H), 7.34 (td, 1H,  $J$  = 7.5, 1.4 Hz),

7.28-7.24 (m, 1H), 4.38 (t, 2H,  $J = 7.4$  Hz), 4.12 (t, 2H,  $J = 8.4$  Hz);  $^{13}\text{C}$  NMR (100 MHz,  $\text{CDCl}_3$ )  $\delta$  190.3, 153.9, 151.0, 149.2, 138.6, 133.1, 129.1, 128.6, 126.8, 125.3, 124.5, 121.7, 111.2, 109.3, 63.1, 45.7; IR (KBr) ( $\text{cm}^{-1}$ ) 3445s, 2848w, 1770s, 1597s, 1382w, 1023w; HRMS (ESI):  $m/z$  calcd for  $\text{C}_{18}\text{H}_{14}\text{NO}_4$   $[\text{M}+\text{H}]^+$ : 308.0918; found 308.0917.

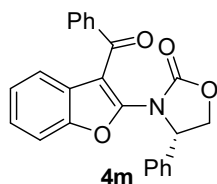

To an oven-dried sealed tube was added *o*-anisole-substituted ynamide **1m** (58.7 mg, 0.20 mmol), acyl chloride **2a** (46.4  $\mu\text{L}$ , 0.40 mmol), DCE (2.0 mL, ynamide *concn* = 0.10 *M*), and  $\text{SnCl}_4$  (60.0  $\mu\text{L}$ , 0.06 mmol, 1.0 *M* in  $\text{CH}_2\text{Cl}_2$ ) at 50  $^\circ\text{C}$ . The reaction vessel was capped and stirred at 50  $^\circ\text{C}$  for 2.0 h. After the reaction was judged to be complete by TLC, the reaction mixture was cooled to rt and filtered through a short pad of silica gel. Then the filtrate was concentrated in vacuo and purified by flash silica gel column chromatography [gradient eluent: 4:1~2:1 petroleum ether/EtOAc] to afford 3-acyl-2-amidobenzofuran **4m** (63.6 mg, 0.17 mmol) in 83% yield.

**4m**:  $R_f = 0.38$  [2:1 petroleum ether/EtOAc]; colorless oil;  $^1\text{H}$  NMR (400 MHz,  $\text{CDCl}_3$ )  $\delta$  7.74-7.72 (m, 2H), 7.62-7.57 (m, 1H), 7.47-7.43 (m, 2H), 7.40-7.35 (m, 3H), 7.33-7.27 (m, 3H), 7.26-7.22 (m, 2H), 7.15-7.11 (m, 1H), 5.48 (t, 1H,  $J = 8.3$  Hz), 4.70 (t, 1H,  $J = 8.8$  Hz), 4.27 (t, 1H,  $J = 8.1$  Hz);  $^{13}\text{C}$  NMR (100 MHz,  $\text{CDCl}_3$ )  $\delta$  190.2, 154.0, 151.1, 148.7, 138.5, 136.2, 133.1, 129.5, 129.33, 129.28, 128.6, 127.4, 126.5, 125.1, 124.1, 121.5, 111.3, 110.5, 71.0, 60.9; IR (KBr) ( $\text{cm}^{-1}$ ) 3439s, 2926w, 1778s, 1655m, 1411m, 1114w; HRMS (ESI):  $m/z$  calcd for  $\text{C}_{24}\text{H}_{18}\text{NO}_4$   $[\text{M}+\text{H}]^+$ : 384.1230; found 384.1221.

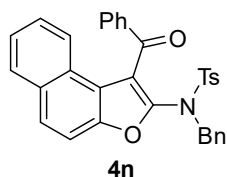

To an oven-dried sealed tube was added *o*-anisole-substituted ynamide **1n** (88.3 mg, 0.20 mmol), acyl chloride **2a** (46.4  $\mu\text{L}$ , 0.40 mmol), DCE (2.0 mL, ynamide *concn* = 0.10 *M*), and  $\text{SnCl}_4$  (60.0  $\mu\text{L}$ , 0.06 mmol, 1.0 *M* in  $\text{CH}_2\text{Cl}_2$ ) at 50  $^\circ\text{C}$ . The reaction vessel was capped and stirred at 50  $^\circ\text{C}$  for 45.0 minutes. After the reaction was judged to be complete by TLC, the reaction mixture was cooled to rt and filtered through a short pad of silica gel. Then the filtrate was concentrated in vacuo and purified by flash silica gel column chromatography [gradient eluent: 10:1~6:1 petroleum ether/EtOAc] to afford 3-acyl-2-amidobenzofuran **4n** (89.4 mg, 0.17 mmol) in 84% yield.

**4n**:  $R_f = 0.31$  [6:1 petroleum ether/EtOAc]; white solid; mp = 63–64  $^\circ\text{C}$ ;  $^1\text{H}$  NMR (400 MHz,  $\text{CDCl}_3$ )  $\delta$  7.85 (d, 1H,  $J = 8.0$  Hz), 7.77 (d, 1H,  $J = 9.0$  Hz), 7.70-7.67 (m, 2H), 7.64 (d, 1H,  $J = 8.4$  Hz), 7.59 (d, 2H,  $J = 8.2$  Hz), 7.55-7.50 (m, 2H), 7.39-7.35 (m, 1H), 7.31-7.22 (m, 3H), 7.17-7.12 (m, 7H),

4.78 (s, 2H), 2.34 (s, 3H);  $^{13}\text{C}$  NMR (100 MHz,  $\text{CDCl}_3$ )  $\delta$  191.4, 149.5, 146.2, 144.4, 137.5, 135.5, 134.5, 133.5, 131.0, 130.0, 129.8, 129.4, 129.1, 128.64, 128.59, 128.3, 128.0, 127.8, 127.2, 126.8, 125.1, 124.7, 121.1, 118.7, 112.0, 55.1, 21.7; IR (KBr) ( $\text{cm}^{-1}$ ) 3438s, 2922w, 1629w, 1575w, 1360m, 1114s; HRMS (ESI):  $m/z$  calcd for  $\text{C}_{33}\text{H}_{26}\text{NO}_4\text{S}$   $[\text{M}+\text{H}]^+$ : 532.1577; found 532.1589.

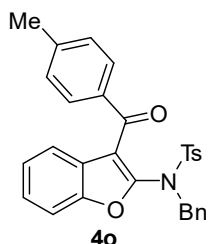

To an oven-dried sealed tube was added *o*-anisole-substituted ynamide **1a** (78.3 mg, 0.20 mmol), acyl chloride **2b** (52.9  $\mu\text{L}$ , 0.40 mmol), DCE (2.0 mL, ynamide *concn* = 0.10 *M*), and  $\text{SnCl}_4$  (60.0  $\mu\text{L}$ , 0.06 mmol, 1.0 *M* in  $\text{CH}_2\text{Cl}_2$ ) at 50  $^\circ\text{C}$ . The reaction vessel was capped and stirred at 50  $^\circ\text{C}$  for 3.0 h. After the reaction was judged to be complete by TLC, the reaction mixture was cooled to rt and filtered through a short pad of silica gel. Then the filtrate was concentrated in vacuo and purified by flash silica gel column chromatography [gradient eluent: 10:1~6:1 petroleum ether/EtOAc] to afford 3-acyl-2-amidobenzofuran **4o** (95.2 mg, 0.19 mmol) in 95% yield.

**4o**:  $R_f$  = 0.34 [6:1 petroleum ether/EtOAc]; white solid; mp = 105–106  $^\circ\text{C}$ ;  $^1\text{H}$  NMR (400 MHz,  $\text{CDCl}_3$ )  $\delta$  7.62 (d, 2H,  $J$  = 8.0 Hz), 7.51 (d, 2H,  $J$  = 7.1 Hz), 7.41 (d, 1H,  $J$  = 8.2 Hz), 7.37 (d, 1H,  $J$  = 7.9 Hz), 7.33–7.29 (m, 1H), 7.25–7.14 (m, 10H), 4.80 (s, 2H), 2.43 (s, 3H), 2.34 (s, 3H);  $^{13}\text{C}$  NMR (100 MHz,  $\text{CDCl}_3$ )  $\delta$  189.6, 151.5, 148.9, 144.5, 143.9, 135.4, 135.3, 134.6, 129.90, 129.87, 129.4, 129.1, 128.6, 128.3, 128.0, 126.9, 125.7, 123.9, 122.1, 115.9, 111.3, 54.4, 22.0, 21.7; IR (KBr) ( $\text{cm}^{-1}$ ) 3425s, 2852w, 1652s, 1459m, 1167s, 1019w; HRMS (ESI):  $m/z$  calcd for  $\text{C}_{30}\text{H}_{26}\text{NO}_4\text{S}$   $[\text{M}+\text{H}]^+$ : 496.1577; found 496.1575.

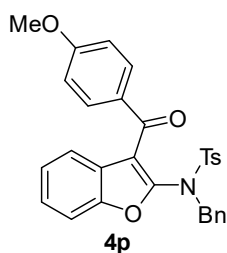

To an oven-dried sealed tube was added *o*-anisole-substituted ynamide **1a** (78.3 mg, 0.20 mmol), acyl chloride **2c** (68.2 mg, 0.40 mmol), DCE (2.0 mL, ynamide *concn* = 0.10 *M*), and  $\text{SnCl}_4$  (60.0  $\mu\text{L}$ , 0.06 mmol, 1.0 *M* in  $\text{CH}_2\text{Cl}_2$ ) at 50  $^\circ\text{C}$ . The reaction vessel was capped and stirred at 50  $^\circ\text{C}$  for 3.0 h. After the reaction was judged to be complete by TLC, the reaction mixture was cooled to rt and filtered through a short pad of silica gel. Then the filtrate was concentrated in vacuo and purified by flash silica gel column chromatography [gradient eluent: 10:1~6:1 petroleum ether/EtOAc] to afford 3-acyl-2-amidobenzofuran **4p** (96.2 mg, 0.19 mmol) in 94% yield.



**4p**:  $R_f = 0.26$  [6:1 petroleum ether/EtOAc]; white solid; mp = 51–52 °C;  $^1\text{H NMR}$  (400 MHz,  $\text{CDCl}_3$ )  $\delta$  7.63–7.59 (m, 4H), 7.41–7.38 (m, 2H), 7.30 (td, 1H,  $J = 7.2, 1.1$  Hz), 7.25–7.18 (m, 6H), 7.16 (d, 2H,  $J = 7.9$  Hz), 6.82 (dt, 2H,  $J = 8.9, 2.8$  Hz), 4.81 (s, 2H), 3.86 (s, 3H), 2.33 (s, 3H);  $^{13}\text{C NMR}$  (100 MHz,  $\text{CDCl}_3$ )  $\delta$  188.4, 163.6, 151.4, 148.5, 144.5, 135.4, 134.6, 132.1, 130.6, 129.8, 129.3, 128.6, 128.3, 128.0, 127.0, 125.7, 123.9, 122.0, 115.9, 113.6, 111.3, 55.6, 54.4, 21.7; IR (KBr) ( $\text{cm}^{-1}$ ) 3435s, 2925w, 1651w, 1450w, 1169m; HRMS (ESI):  $m/z$  calcd for  $\text{C}_{30}\text{H}_{26}\text{NO}_5\text{S}$   $[\text{M}+\text{H}]^+$ : 512.1526; found 512.1526.

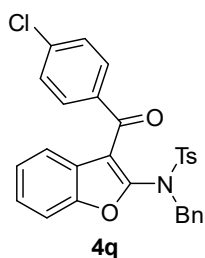

To an oven-dried sealed tube was added *o*-anisole-substituted ynamide **1a** (78.3 mg, 0.20 mmol), acyl chloride **2d** (51.1  $\mu\text{L}$ , 0.40 mmol), DCE (2.0 mL, ynamide *concn* = 0.10 *M*), and  $\text{SnCl}_4$  (60.0  $\mu\text{L}$ , 0.06 mmol, 1.0 *M* in  $\text{CH}_2\text{Cl}_2$ ) at 50 °C. The reaction vessel was capped and stirred at 50 °C for 4.5 h. After the reaction was judged to be complete by TLC, the reaction mixture was cooled to rt and filtered through a short pad of silica gel. Then the filtrate was concentrated in vacuo and purified by flash silica gel column chromatography [gradient eluent: 10:1~6:1 petroleum ether/EtOAc] to afford 3-acyl-2-amidobenzofuran **4q** (84.6 mg, 0.16 mmol) in 82% yield.

**4q**:  $R_f = 0.36$  [6:1 petroleum ether/EtOAc]; white solid; mp = 64–65 °C;  $^1\text{H NMR}$  (400 MHz,  $\text{CDCl}_3$ )  $\delta$  7.57 (d, 2H,  $J = 8.3$  Hz), 7.50 (d, 1H,  $J = 7.8$  Hz), 7.46 (d, 2H,  $J = 8.2$  Hz), 7.41 (d, 1H,  $J = 8.2$  Hz), 7.33 (td, 1H,  $J = 7.3, 1.1$  Hz), 7.28–7.19 (m, 10 H), 4.75 (s, 2H), 2.37 (s, 3H);  $^{13}\text{C NMR}$  (100 MHz,  $\text{CDCl}_3$ )  $\delta$  188.9, 151.5, 148.9, 144.8, 139.1, 136.2, 135.1, 134.2, 131.0, 129.97, 129.62, 128.74, 128.67, 128.56, 128.0, 126.8, 125.9, 124.2, 122.0, 115.2, 111.3, 53.8, 21.7; IR (KBr) ( $\text{cm}^{-1}$ ) 3433s, 2850w, 1652m, 1366m, 1168s, 882m; HRMS (ESI):  $m/z$  calcd for  $\text{C}_{29}\text{H}_{23}\text{ClNO}_4\text{S}$   $[\text{M}+\text{H}]^+$ : 516.1031; found 516.1031.

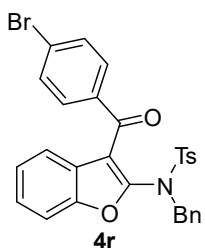

To an oven-dried sealed tube was added *o*-anisole-substituted ynamide **1a** (78.3 mg, 0.20 mmol), acyl chloride **2e** (87.8 mg, 0.40 mmol), DCE (2.0 mL, ynamide *concn* = 0.10 *M*), and  $\text{SnCl}_4$  (60.0  $\mu\text{L}$ , 0.06 mmol, 1.0 *M* in  $\text{CH}_2\text{Cl}_2$ ) at 50 °C. The reaction vessel was capped and stirred at 50 °C for 3.5 h. After the reaction was judged to be complete by TLC, the reaction mixture was cooled to rt and filtered through a short pad of silica gel. Then the filtrate was concentrated in vacuo and purified by

flash silica gel column chromatography [gradient eluent: 10:1~6:1 petroleum ether/EtOAc] to afford 3-acyl-2-amidobenzofuran **4r** (91.1 mg, 0.16 mmol) in 81% yield.

**4r**:  $R_f$  = 0.41 [6:1 petroleum ether/EtOAc]; white solid; mp = 47–48 °C;  $^1\text{H}$  NMR (400 MHz,  $\text{CDCl}_3$ )  $\delta$  7.57 (d, 2H,  $J$  = 8.4 Hz), 7.50 (d, 1H,  $J$  = 7.4 Hz), 7.45–7.37 (m, 5H), 7.34 (td, 1H,  $J$  = 7.4, 1.4 Hz), 7.26–7.20 (m, 8H), 4.75 (s, 2H), 2.38 (s, 3H);  $^{13}\text{C}$  NMR (100 MHz,  $\text{CDCl}_3$ )  $\delta$  189.1, 151.5, 148.9, 144.8, 136.7, 135.1, 134.2, 131.7, 131.1, 130.0, 129.6, 128.8, 128.6, 128.0, 127.8, 126.8, 125.9, 124.3, 122.0, 115.2, 111.3, 53.8, 21.8; IR (KBr) ( $\text{cm}^{-1}$ ) 3442s, 3032w, 2852w, 1653m, 1365m, 1168m, 1010w; HRMS (ESI):  $m/z$  calcd for  $\text{C}_{29}\text{H}_{23}\text{BrNO}_4\text{S}$   $[\text{M}+\text{H}]^+$ : 560.0526; found 560.0523.

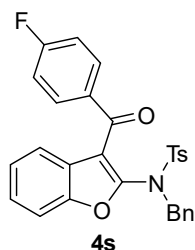

To an oven-dried sealed tube was added *o*-anisole-substituted ynamide **1a** (78.3 mg, 0.20 mmol), acyl chloride **2f** (47.3  $\mu\text{L}$ , 0.40 mmol), DCE (2.0 mL, ynamide *concn* = 0.10 M), and  $\text{SnCl}_4$  (60.0  $\mu\text{L}$ , 0.06 mmol, 1.0 M in  $\text{CH}_2\text{Cl}_2$ ) at 50 °C. The reaction vessel was capped and stirred at 50 °C for 5.0 h. After the reaction was judged to be complete by TLC, the reaction mixture was cooled to rt and filtered through a short pad of silica gel. Then the filtrate was concentrated in vacuo and purified by flash silica gel column chromatography [gradient eluent: 10:1~6:1 petroleum ether/EtOAc] to afford 3-acyl-2-amidobenzofuran **4s** (80.9 mg, 0.16 mmol) in 81% yield.

**4s**:  $R_f$  = 0.40 [6:1 petroleum ether/EtOAc]; white solid, mp = 122–123 °C;  $^1\text{H}$  NMR (400 MHz,  $\text{CDCl}_3$ )  $\delta$  7.60–7.54 (m, 4H), 7.50 (d, 1H,  $J$  = 7.8 Hz), 7.42 (d, 1H,  $J$  = 8.2 Hz), 7.33 (td, 1H,  $J$  = 7.2, 1.4 Hz), 7.25–7.20 (m, 8H), 6.98 (t, 2H,  $J$  = 8.7 Hz), 4.75 (s, 2H), 2.37 (s, 3H);  $^{13}\text{C}$  NMR (100 MHz,  $\text{CDCl}_3$ )  $\delta$  188.6, 165.6 (d,  $J$  = 252.4 Hz), 151.5, 148.7, 144.7, 135.1, 134.21, 134.18 (d,  $J$  = 2.9 Hz), 132.2 (d,  $J$  = 9.1 Hz), 130.0, 129.6, 128.7, 128.5, 128.0, 126.9, 125.9, 124.2, 122.0, 115.5 (d,  $J$  = 21.8), 115.4, 111.3, 53.8, 21.7; IR (KBr) ( $\text{cm}^{-1}$ ) 3428m, 2850w, 1652s, 1362m, 1169s, 930w; HRMS (ESI):  $m/z$  calcd for  $\text{C}_{29}\text{H}_{23}\text{FNO}_4\text{S}$   $[\text{M}+\text{H}]^+$ : 500.1326; found 500.1325.

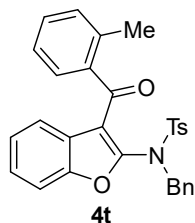

To an oven-dried sealed tube was added *o*-anisole-substituted ynamide **1a** (79.7 mg, 0.20 mmol), acyl chloride **2g** (52.2  $\mu\text{L}$ , 0.40 mmol), DCE (2.0 mL, ynamide *concn* = 0.10 M), and  $\text{SnCl}_4$  (60.0  $\mu\text{L}$ , 0.06 mmol, 1.0 M in  $\text{CH}_2\text{Cl}_2$ ) at 50 °C. The reaction vessel was capped and stirred at 50 °C for 3.0 h. After the reaction was judged to be complete by TLC, the reaction mixture was cooled to rt and

filtered through a short pad of silica gel. Then the filtrate was concentrated in vacuo and purified by flash silica gel column chromatography [gradient eluent: 10:1~8:1 petroleum ether/EtOAc] to afford 3-acyl-2-amidobenzofuran **4t** (85.3 mg, 0.17 mmol) in 86% yield.

**4t**:  $R_f$  = 0.38 [10:1 petroleum ether/EtOAc]; colorless oil;  $^1\text{H}$  NMR (400 MHz,  $\text{CDCl}_3$ )  $\delta$  7.60 (d, 2H,  $J$  = 8.3 Hz), 7.42-7.28 (m, 5H), 7.24-7.14 (m, 8H), 7.05-6.97 (m, 2H), 4.70 (s, 2H), 2.391 (s, 3H), 2.386 (s, 3H);  $^{13}\text{C}$  NMR (100 MHz,  $\text{CDCl}_3$ )  $\delta$  192.1, 151.4, 150.0, 144.6, 138.6, 138.0, 135.3, 134.2, 131.4, 131.0, 129.9, 129.5, 129.4, 128.6, 128.3, 128.1, 126.6, 125.7, 125.5, 124.2, 122.1, 116.2, 111.2, 53.7, 21.8, 20.1; IR (KBr) ( $\text{cm}^{-1}$ ) 3450w, 1651m, 1597m, 1451s, 1366s, 1168s, 1089m; HRMS (ESI):  $m/z$  calcd for  $\text{C}_{30}\text{H}_{26}\text{NO}_4\text{S}$   $[\text{M}+\text{H}]^+$ : 496.1577; found 496.1565.

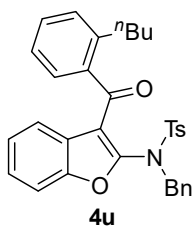

To an oven-dried sealed tube was added *o*-anisole-substituted ynamide **1a** (79.7 mg, 0.20 mmol), acyl chloride **2h** (78.7 mg, 0.40 mmol), DCE (2.0 mL, ynamide *concn* = 0.10 M), and  $\text{SnCl}_4$  (60.0  $\mu\text{L}$ , 0.06 mmol, 1.0 M in  $\text{CH}_2\text{Cl}_2$ ) at 50  $^\circ\text{C}$ . The reaction vessel was capped and stirred at 50  $^\circ\text{C}$  for 3.0 h. After the reaction was judged to be complete by TLC, the reaction mixture was cooled to rt and filtered through a short pad of silica gel. Then the filtrate was concentrated in vacuo and purified by flash silica gel column chromatography [gradient eluent: 30:1~20:1 petroleum ether/EtOAc] to afford 3-acyl-2-amidobenzofuran **4u** (90.6 mg, 0.17 mmol) in 84% yield.

**4u**:  $R_f$  = 0.30 [10:1 petroleum ether/EtOAc]; colorless oil;  $^1\text{H}$  NMR (400 MHz,  $\text{CDCl}_3$ )  $\delta$  7.67 (d, 2H,  $J$  = 8.3 Hz), 7.43-7.40 (m, 2H), 7.35-7.27 (m, 3H), 7.24 (s, 1H), 7.19-7.12 (m, 6H), 7.08-7.05 (m, 2H), 6.98-6.96 (m, 1H), 4.76 (s, 2H), 2.69 (t, 2H,  $J$  = 7.8 Hz), 2.41 (s, 3H), 1.57-1.51 (m, 2H), 1.32-1.25 (m, 2H), 0.85 (t, 3H,  $J$  = 7.3 Hz);  $^{13}\text{C}$  NMR (100 MHz,  $\text{CDCl}_3$ )  $\delta$  192.0, 151.5, 150.6, 144.6, 142.6, 138.8, 135.6, 134.5, 130.9, 130.5, 129.9, 129.3, 129.2, 128.6, 128.28, 128.26, 126.4, 125.7, 125.5, 124.1, 122.1, 116.2, 111.4, 53.9, 34.1, 32.9, 22.9, 21.8, 14.1; IR (KBr) ( $\text{cm}^{-1}$ ) 3450w, 1660m, 1598m, 1451m, 1365s, 1168s, 1090w; HRMS (ESI):  $m/z$  calcd for  $\text{C}_{33}\text{H}_{32}\text{NO}_4\text{S}$   $[\text{M}+\text{H}]^+$ : 538.2047; found 538.2042.

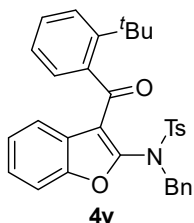

To an oven-dried sealed tube was added *o*-anisole-substituted ynamide **1a** (79.7 mg, 0.20 mmol), acyl chloride **2i** (78.7 mg, 0.40 mmol), DCE (2.0 mL, ynamide *concn* = 0.10 M), and  $\text{SnCl}_4$  (60.0  $\mu\text{L}$ ,

0.06 mmol, 1.0 M in CH<sub>2</sub>Cl<sub>2</sub>) at 50 °C. The reaction vessel was capped and stirred at 50 °C for 3.0 h. After the reaction was judged to be complete by TLC, the reaction mixture was cooled to rt and filtered through a short pad of silica gel. Then the filtrate was concentrated in vacuo and purified by flash silica gel column chromatography [gradient eluent: 30:1~20:1 petroleum ether/EtOAc] to afford 3-acyl-2-amidobenzofuran **4v** (94.6 mg, 0.18 mmol) in 88% yield.

**4v**:  $R_f$  = 0.35 [10:1 petroleum ether/EtOAc]; colorless oil; <sup>1</sup>H NMR (400 MHz, CDCl<sub>3</sub>) δ 7.88 (d, 2H,  $J$  = 8.4 Hz), 7.57 (d, 1H,  $J$  = 7.8 Hz), 7.40 (d, 2H,  $J$  = 8.2 Hz), 7.32 (d, 2H,  $J$  = 8.1 Hz), 7.28-7.26 (m, 2H), 7.23-7.10 (m, 5H), 6.93 (t, 1H,  $J$  = 7.6 Hz), 6.72 (dd, 1H,  $J$  = 7.6, 1.1 Hz), 6.15 (d, 1H,  $J$  = 7.9 Hz), 4.98 (s, 2H), 2.42 (s, 3H), 1.30 (s, 9H); <sup>13</sup>C NMR (100 MHz, CDCl<sub>3</sub>) δ 193.0, 152.2, 151.5, 147.5, 144.5, 140.6, 136.1, 134.9, 129.9, 129.7, 128.58, 128.56, 128.3, 128.1, 127.5, 127.2, 125.7, 125.5, 125.4, 123.9, 121.6, 115.4, 111.6, 53.3, 36.3, 32.1, 21.8; IR (KBr) (cm<sup>-1</sup>) 3442w, 1666m, 1556m, 1451s, 1365s, 1168s, 1090m; HRMS (ESI):  $m/z$  calcd for C<sub>33</sub>H<sub>32</sub>NO<sub>4</sub>S [M+H]<sup>+</sup>: 538.2047; found 538.2036.

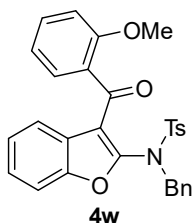

To an oven-dried sealed tube was added *o*-anisole-substituted ynamide **1a** (78.3 mg, 0.20 mmol), acyl chloride **2j** (57.6 μL, 0.40 mmol), DCE (2.0 mL, ynamide *concn* = 0.10 M), and SnCl<sub>4</sub> (60.0 μL, 0.06 mmol, 1.0 M in CH<sub>2</sub>Cl<sub>2</sub>) at 50 °C. The reaction vessel was capped and stirred at 50 °C for 4.0 h. After the reaction was judged to be complete by TLC, the reaction mixture was cooled to rt and filtered through a short pad of silica gel. Then the filtrate was concentrated in vacuo and purified by flash silica gel column chromatography [gradient eluent: 8:1~4:1 petroleum ether/EtOAc] to afford 3-acyl-2-amidobenzofuran **4w** (85.2 mg, 0.17 mmol) in 83% yield.

**4w**:  $R_f$  = 0.19 [6:1 petroleum ether/EtOAc]; white solid; mp = 72–73 °C; <sup>1</sup>H NMR (400 MHz, CDCl<sub>3</sub>) δ 7.71 (d, 2H,  $J$  = 8.3 Hz), 7.49 (td, 1H,  $J$  = 8.3, 1.7 Hz), 7.38 (d, 1H,  $J$  = 8.3 Hz), 7.28-7.24 (m, 2H), 7.21 (d, 2H,  $J$  = 8.1 Hz), 7.16-7.09 (m, 7H), 6.99-6.92 (m, 2H), 4.77 (s, 2H), 3.55 (s, 3H), 2.36 (s, 3H); <sup>13</sup>C NMR (100 MHz, CDCl<sub>3</sub>) δ 189.4, 157.8, 151.3, 150.5, 144.3, 135.9, 134.9, 132.9, 130.2, 129.7, 129.4, 128.9, 128.5, 128.2, 128.0, 126.1, 125.5, 123.9, 121.5, 120.5, 116.7, 111.6, 111.3, 55.6, 54.3, 21.7; IR (KBr) (cm<sup>-1</sup>) 3442s, 2848w, 1655s, 1485w, 1249m, 1103m; HRMS (ESI):  $m/z$  calcd for C<sub>30</sub>H<sub>26</sub>NO<sub>5</sub>S [M+H]<sup>+</sup>: 512.1526; found 512.1526.

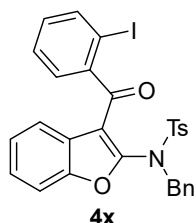

To an oven-dried sealed tube was added *o*-anisole-substituted ynamide **1a** (78.3 mg, 0.20 mmol), acyl chloride **2k** (55.2  $\mu$ L, 0.40 mmol), DCE (2.0 mL, ynamide *concn* = 0.10 M), and SnCl<sub>4</sub> (60.0  $\mu$ L, 0.06 mmol, 1.0 M in CH<sub>2</sub>Cl<sub>2</sub>) at 50 °C. The reaction vessel was capped and stirred at 50 °C for 4.0 h. After the reaction was judged to be complete by TLC, the reaction mixture was cooled to rt and filtered through a short pad of silica gel. Then the filtrate was concentrated in vacuo and purified by flash silica gel column chromatography [gradient eluent: 10:1~6:1 petroleum ether/EtOAc] to afford 3-acyl-2-amidobenzofuran **4x** (103.8 mg, 0.17 mmol) in 85% yield.

**4x**:  $R_f$  = 0.36 [6:1 petroleum ether/EtOAc]; white solid; mp = 90–91 °C; <sup>1</sup>H NMR (400 MHz, CDCl<sub>3</sub>)  $\delta$  7.87 (d, 1H,  $J$  = 7.9 Hz), 7.63 (d, 2H,  $J$  = 8.3 Hz), 7.42–7.30 (m, 4H), 7.26–7.20 (m, 5H), 7.19–7.13 (m, 3H), 7.10–7.08 (m, 2H), 4.69 (s, 2H), 2.41 (s, 3H); <sup>13</sup>C NMR (100 MHz, CDCl<sub>3</sub>)  $\delta$  191.2, 151.5, 151.3, 144.7, 143.9, 140.1, 135.5, 134.3, 131.7, 129.9, 129.8, 129.2, 128.7, 128.4, 128.24, 128.15, 126.2, 126.0, 124.5, 122.1, 114.8, 111.3, 92.5, 53.8, 21.8; IR (KBr) (cm<sup>-1</sup>) 3442s, 2845w, 1663m, 1451m, 1366m, 1265m, 1016w; HRMS (ESI):  $m/z$  calcd for C<sub>29</sub>H<sub>23</sub>INO<sub>4</sub>S [M+H]<sup>+</sup>: 608.0387; found 608.0383.

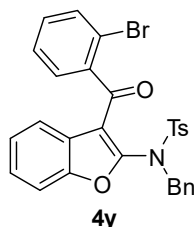

To an oven-dried sealed tube was added *o*-anisole-substituted ynamide **1a** (78.3 mg, 0.20 mmol), acyl chloride **2l** (52.8  $\mu$ L, 0.40 mmol), DCE (2.0 mL, ynamide *concn* = 0.10 M), and SnCl<sub>4</sub> (60.0  $\mu$ L, 0.06 mmol, 1.0 M in CH<sub>2</sub>Cl<sub>2</sub>) at 50 °C. The reaction vessel was capped and stirred at 50 °C for 4.0 h. After the reaction was judged to be complete by TLC, the reaction mixture was cooled to rt and filtered through a short pad of silica gel. Then the filtrate was concentrated in vacuo and purified by flash silica gel column chromatography [gradient eluent: 10:1~6:1 petroleum ether/EtOAc] to afford 3-acyl-2-amidobenzofuran **4y** (93.4 mg, 0.17 mmol) in 83% yield.

**4y**:  $R_f$  = 0.34 [6:1 petroleum ether/EtOAc]; white solid; mp = 118–119 °C; <sup>1</sup>H NMR (400 MHz, CDCl<sub>3</sub>)  $\delta$  7.63 (d, 2H,  $J$  = 8.2 Hz), 7.58–7.56 (m, 1H), 7.41 (d, 1H,  $J$  = 8.2 Hz), 7.37–7.32 (m, 3H), 7.31–7.23 (m, 4H), 7.21–7.13 (m, 4H), 7.09–7.07 (m, 2H), 4.68 (s, 2H), 2.42 (s, 3H); <sup>13</sup>C NMR (100 MHz, CDCl<sub>3</sub>)  $\delta$  189.9, 151.5, 151.2, 144.7, 140.8, 135.5, 134.3, 133.5, 131.7, 130.2, 129.9, 129.2, 128.7, 128.3, 128.2, 127.5, 126.010, 125.995, 124.5, 122.0, 119.9, 115.5, 111.3, 53.8, 21.8; IR (KBr)

(cm<sup>-1</sup>) 3446s, 2853w, 1654m, 1385w, 1265w, 1168s, 1057w; HRMS (ESI): m/z calcd for C<sub>29</sub>H<sub>23</sub>BrNO<sub>4</sub>S [M+H]<sup>+</sup>: 560.0526; found 560.0522.

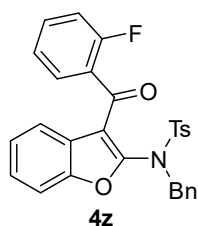

To an oven-dried sealed tube was added *o*-anisole-substituted ynamide **1a** (78.3 mg, 0.20 mmol), acyl chloride **2m** (47.3  $\mu$ L, 0.40 mmol), DCE (2.0 mL, ynamide *concn* = 0.10 M), and SnCl<sub>4</sub> (60.0  $\mu$ L, 0.06 mmol, 1.0 M in CH<sub>2</sub>Cl<sub>2</sub>) at 50 °C. The reaction vessel was capped and stirred at 50 °C for 5.0 h. After the reaction was judged to be complete by TLC, the reaction mixture was cooled to rt and filtered through a short pad of silica gel. Then the filtrate was concentrated in vacuo and purified by flash silica gel column chromatography [gradient eluent: 10:1~6:1 petroleum ether/EtOAc] to afford 3-acyl-2-amidobenzofuran **4z** (82.8 mg, 0.17 mmol) in 83% yield.

**4z**:  $R_f$  = 0.37 [6:1 petroleum ether/EtOAc]; colorless oil; <sup>1</sup>H NMR (400 MHz, CDCl<sub>3</sub>)  $\delta$  7.57 (d, 2H,  $J$  = 8.4 Hz), 7.53-7.47 (m, 2H), 7.40 (d, 1H,  $J$  = 8.2 Hz), 7.36-7.30 (m, 2H), 7.24-7.18 (m, 8H), 7.12 (td, 1H,  $J$  = 7.6, 0.9 Hz), 7.06-7.01 (m, 1H), 4.72 (s, 2H), 2.37 (s, 3H); <sup>13</sup>C NMR (100 MHz, CDCl<sub>3</sub>)  $\delta$  187.0, 160.5 (d,  $J$  = 254.0 Hz), 151.4, 150.3, 144.6, 135.3, 134.2, 133.5 (d,  $J$  = 8.6 Hz), 131.1 (d,  $J$  = 2.1 Hz), 129.9, 129.4, 128.6, 128.4, 128.0, 127.7 (d,  $J$  = 12.1 Hz), 126.2, 125.9, 124.4, 124.1 (d,  $J$  = 3.8 Hz), 121.8, 116.4 (d,  $J$  = 21.4 Hz), 116.3, 111.3, 53.9, 21.7; IR (KBr) (cm<sup>-1</sup>) 3428s, 2850w, 1655m, 1451s, 1292w, 1168s, 1006w; HRMS (ESI): m/z calcd for C<sub>29</sub>H<sub>23</sub>FNO<sub>4</sub>S [M+H]<sup>+</sup>: 500.1326; found 500.1323.

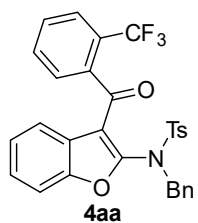

To an oven-dried sealed tube was added *o*-anisole-substituted ynamide **1a** (78.3 mg, 0.20 mmol), acyl chloride **2n** (52.9  $\mu$ L, 0.40 mmol), DCE (2.0 mL, ynamide *concn* = 0.10 M), and SnCl<sub>4</sub> (60.0  $\mu$ L, 0.06 mmol, 1.0 M in CH<sub>2</sub>Cl<sub>2</sub>) at 50 °C. The reaction vessel was capped and stirred at 50 °C for 8.0 h. After the reaction was judged to be complete by TLC, the reaction mixture was cooled to rt and filtered through a short pad of silica gel. Then the filtrate was concentrated in vacuo and purified by flash silica gel column chromatography [gradient eluent: 10:1~6:1 petroleum ether/EtOAc] to afford 3-acyl-2-amidobenzofuran **4aa** (83.3 mg, 0.15 mmol) in 76% yield.

**4aa**:  $R_f$  = 0.30 [6:1 petroleum ether/EtOAc]; white solid; mp = 122–123 °C; <sup>1</sup>H NMR (400 MHz, CDCl<sub>3</sub>)  $\delta$  7.77 (d, 1H,  $J$  = 7.7 Hz), 7.70 (d, 2H,  $J$  = 8.4 Hz), 7.62 (t, 1H,  $J$  = 7.6 Hz), 7.55 (t, 1H,  $J$  = 7.5 Hz), 7.41 (d, 1H,  $J$  = 8.3 Hz), 7.32-7.23 (m, 4H), 7.17-7.07 (m, 6H), 6.98 (d, 1H,  $J$  = 8.0 Hz),

4.74 (s, 2H), 2.42 (s, 3H);  $^{13}\text{C}$  NMR (100 MHz,  $\text{CDCl}_3$ )  $\delta$  189.0, 152.0, 151.5, 144.8, 138.8 (q,  $J = 2.0$  Hz), 135.6, 134.3, 131.9, 130.4, 129.9, 128.9, 128.8, 128.6, 128.29, 128.27, 127.8 (q,  $J = 32.1$  Hz), 127.0 (q,  $J = 4.8$  Hz), 126.0, 125.7, 124.5, 123.7 (q,  $J = 272.5$  Hz), 121.8, 115.2, 111.5, 54.0, 21.8; IR (KBr) ( $\text{cm}^{-1}$ ) 3446s, 2854w, 1667m, 1558m, 1314m, 1067w; HRMS (ESI):  $m/z$  calcd for  $\text{C}_{30}\text{H}_{23}\text{F}_3\text{NO}_4\text{S}$   $[\text{M}+\text{H}]^+$ : 550.1294; found 550.1293.

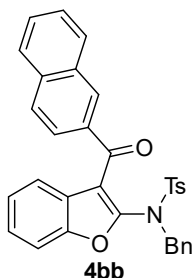

To an oven-dried sealed tube was added *o*-anisole-substituted ynamide **1a** (78.3 mg, 0.20 mmol), acyl chloride **2o** (76.3 mg, 0.40 mmol), DCE (2.0 mL, ynamide *concn* = 0.10 M), and  $\text{SnCl}_4$  (60.0  $\mu\text{L}$ , 0.06 mmol, 1.0 M in  $\text{CH}_2\text{Cl}_2$ ) at 50  $^\circ\text{C}$ . The reaction vessel was capped and stirred at 50  $^\circ\text{C}$  for 1.5 h. After the reaction was judged to be complete by TLC, the reaction mixture was cooled to rt and filtered through a short pad of silica gel. Then the filtrate was concentrated in vacuo and purified by flash silica gel column chromatography [gradient eluent: 10:1~6:1 petroleum ether/EtOAc] to afford 3-acyl-2-amidobenzofuran **4bb** (100.8 mg, 0.19 mmol) in 95% yield.

**4bb**:  $R_f = 0.31$  [6:1 petroleum ether/EtOAc]; colorless oil;  $^1\text{H}$  NMR (400 MHz,  $\text{CDCl}_3$ )  $\delta$  8.13 (s, 1H), 7.90 (d, 1H,  $J = 8.2$  Hz), 7.85 (d, 1H,  $J = 8.6$  Hz), 7.79 (d, 1H,  $J = 8.2$  Hz), 7.77-7.74 (m, 1H), 7.66 (d, 2H,  $J = 8.1$  Hz), 7.63-7.59 (m, 1H), 7.54-7.50 (m, 1H), 7.45 (d, 1H,  $J = 8.3$  Hz), 7.35-7.30 (m, 2H), 7.18-7.10 (m, 8H), 4.79 (s, 2H), 2.23 (s, 3H);  $^{13}\text{C}$  NMR (100 MHz,  $\text{CDCl}_3$ )  $\delta$  189.8, 151.6, 149.3, 144.5, 135.8, 135.4, 135.2, 134.6, 132.4, 131.8, 130.0, 129.8, 129.2, 128.68, 128.64, 128.32, 128.29, 128.16, 127.9, 126.81, 126.75, 125.8, 125.2, 124.0, 122.0, 116.0, 111.5, 54.8, 21.6; IR (KBr) ( $\text{cm}^{-1}$ ) 3434m, 2848w, 1653m, 1451m, 1362s, 1089m; HRMS (ESI):  $m/z$  calcd for  $\text{C}_{33}\text{H}_{26}\text{NO}_4\text{S}$   $[\text{M}+\text{H}]^+$ : 532.1577; found 532.1577.

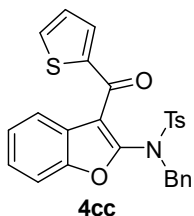

To an oven-dried sealed tube was added *o*-anisole-substituted ynamide **1a** (78.3 mg, 0.20 mmol), acyl chloride **2p** (42.8  $\mu\text{L}$ , 0.40 mmol), DCE (2.0 mL, ynamide *concn* = 0.10 M), and  $\text{SnCl}_4$  (60.0  $\mu\text{L}$ , 0.06 mmol, 1.0 M in  $\text{CH}_2\text{Cl}_2$ ) at 50  $^\circ\text{C}$ . The reaction vessel was capped and stirred at 50  $^\circ\text{C}$  for 2.5 h. After the reaction was judged to be complete by TLC, the reaction mixture was cooled to rt and filtered through a short pad of silica gel. Then the filtrate was concentrated in vacuo and purified by flash silica gel column chromatography [gradient eluent: 10:1~6:1 petroleum ether/EtOAc] to afford

3-acyl-2-amidobenzofuran **4cc** (88.8 mg, 0.18 mmol) in 92% yield.

**4cc**:  $R_f$  = 0.32 [6:1 petroleum ether/EtOAc]; white solid; mp = 125–126 °C;  $^1\text{H}$  NMR (400 MHz,  $\text{CDCl}_3$ )  $\delta$  7.64 (dd, 1H,  $J$  = 4.9, 1.2 Hz), 7.64–7.62 (m, 2H), 7.53 (d, 1H,  $J$  = 7.5 Hz), 7.41 (d, 1H,  $J$  = 8.3 Hz), 7.32 (td, 1H,  $J$  = 7.2, 1.2 Hz), 7.27–7.19 (m, 6H), 7.17–7.14 (m, 3H), 6.96 (dd, 1H,  $J$  = 4.9, 3.7 Hz), 4.86 (s, 2H), 2.35 (s, 3H);  $^{13}\text{C}$  NMR (100 MHz,  $\text{CDCl}_3$ )  $\delta$  181.4, 151.5, 148.3, 144.6, 144.3, 135.4, 135.0, 134.6, 134.5, 129.8, 129.3, 128.7, 128.4, 128.03, 127.96, 126.5, 125.9, 124.0, 121.8, 115.9, 111.4, 54.8, 21.7; IR (KBr) ( $\text{cm}^{-1}$ ) 3449s, 2854w, 1654w, 1355w, 1169m, 1089w; HRMS (ESI):  $m/z$  calcd for  $\text{C}_{27}\text{H}_{22}\text{NO}_4\text{S}_2$   $[\text{M}+\text{H}]^+$ : 488.0983; found 488.0985.

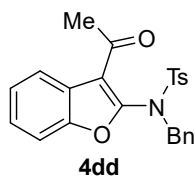

To an oven-dried sealed tube was added *o*-anisole-substituted ynamide **1a** (78.3 mg, 0.20 mmol), acyl chloride **2q** (28.4  $\mu\text{L}$ , 0.40 mmol), DCE (2.0 mL, ynamide *concn* = 0.10 *M*), and  $\text{SnCl}_4$  (60.0  $\mu\text{L}$ , 0.06 mmol, 1.0 *M* in  $\text{CH}_2\text{Cl}_2$ ) at 50 °C. The reaction vessel was capped and stirred at 50 °C for 1.0 h. After the reaction was judged to be complete by TLC, the reaction mixture was cooled to rt and filtered through a short pad of silica gel. Then the filtrate was concentrated in vacuo and purified by flash silica gel column chromatography [gradient eluent: 12:1~8:1 petroleum ether/EtOAc] to afford 3-acyl-2-amidobenzofuran **4dd** (66.0 mg, 0.16 mmol) in 79% yield.

**4dd**:  $R_f$  = 0.39 [6:1 petroleum ether/EtOAc]; white solid; mp = 124–125 °C;  $^1\text{H}$  NMR (400 MHz,  $\text{CDCl}_3$ )  $\delta$  8.18–8.15 (m, 1H), 7.66 (d, 2H,  $J$  = 8.3 Hz), 7.36–7.28 (m, 5H), 7.23–7.19 (m, 5H), 4.73 (s, 2H), 2.48 (s, 3H), 2.40 (s, 3H);  $^{13}\text{C}$  NMR (100 MHz,  $\text{CDCl}_3$ )  $\delta$  194.7, 151.4, 149.9, 145.1, 134.7, 133.6, 130.1, 129.6, 128.87, 128.85, 128.29, 126.2, 125.8, 124.7, 123.7, 118.4, 110.7, 54.2, 29.1, 21.8; IR (KBr) ( $\text{cm}^{-1}$ ) 3436m, 2926w, 1670s, 1449m, 1168s, 958w; HRMS (ESI):  $m/z$  calcd for  $\text{C}_{24}\text{H}_{22}\text{NO}_4\text{S}$   $[\text{M}+\text{H}]^+$ : 420.1264; found 420.1260.

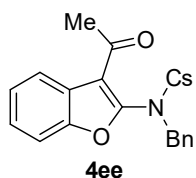

To an oven-dried sealed tube was added *o*-anisole-substituted ynamide **1c** (82.4 mg, 0.20 mmol), acyl chloride **2q** (28.4  $\mu\text{L}$ , 0.40 mmol), DCE (2.0 mL, ynamide *concn* = 0.10 *M*), and  $\text{SnCl}_4$  (60.0  $\mu\text{L}$ , 0.06 mmol, 1.0 *M* in  $\text{CH}_2\text{Cl}_2$ ) at 50 °C. The reaction vessel was capped and stirred at 50 °C for 1.5 h. After the reaction was judged to be complete by TLC, the reaction mixture was cooled to rt and filtered through a short pad of silica gel. Then the filtrate was concentrated in vacuo and purified by flash silica gel column chromatography [gradient eluent: 12:1~8:1 petroleum ether/EtOAc] to afford 3-acyl-2-amidobenzofuran **4ee** (70.8 mg, 0.16 mmol) in 80% yield.



**4ee**:  $R_f = 0.49$  [6:1 petroleum ether/EtOAc]; white solid; mp = 136–137 °C;  $^1\text{H NMR}$  (400 MHz,  $\text{CDCl}_3$ )  $\delta$  8.17–8.14 (m, 1H), 7.71 (dt, 2H,  $J = 8.7, 2.4$  Hz), 7.52 (dt, 2H,  $J = 8.7, 2.4$  Hz), 7.39–7.30 (m, 3H), 7.25–7.20 (m, 5H), 4.75 (s, 2H), 2.39 (s, 3H);  $^{13}\text{C NMR}$  (100 MHz,  $\text{CDCl}_3$ )  $\delta$  194.4, 151.5, 149.3, 140.7, 136.3, 133.3, 129.8, 129.69, 129.67, 129.03, 128.97, 126.4, 125.7, 124.8, 123.8, 118.5, 110.8, 54.6, 29.2; IR (KBr) ( $\text{cm}^{-1}$ ) 3441s, 2856w, 1665s, 1585m, 1371s, 1072m; HRMS (ESI):  $m/z$  calcd for  $\text{C}_{23}\text{H}_{19}\text{ClNO}_2\text{S}$   $[\text{M}+\text{H}]^+$ : 440.0718; found 440.0714.

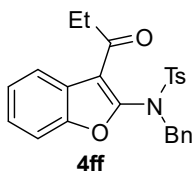

To an oven-dried sealed tube was added *o*-anisole-substituted ynamide **1a** (78.3 mg, 0.20 mmol), acyl chloride **2r** (34.9  $\mu\text{L}$ , 0.40 mmol), DCE (2.0 mL, ynamide *concn* = 0.10 M), and  $\text{SnCl}_4$  (60.0  $\mu\text{L}$ , 0.06 mmol, 1.0 M in  $\text{CH}_2\text{Cl}_2$ ) at 50 °C. The reaction vessel was capped and stirred at 50 °C for 3.0 h. After the reaction was judged to be complete by TLC, the reaction mixture was cooled to rt and filtered through a short pad of silica gel. Then the filtrate was concentrated in vacuo and purified by flash silica gel column chromatography [gradient eluent: 12:1~8:1 petroleum ether/EtOAc] to afford 3-acyl-2-amidobenzofuran **4ff** (73.1 mg, 0.17 mmol) in 84% yield.

**4ff**:  $R_f = 0.38$  [6:1 petroleum ether/EtOAc]; white solid; mp = 75–76 °C;  $^1\text{H NMR}$  (400 MHz,  $\text{CDCl}_3$ )  $\delta$  8.15–8.13 (m, 1H), 7.66 (d, 2H,  $J = 8.4, 2.3$  Hz), 7.34–7.27 (m, 5H), 7.19–7.22 (m, 5H), 4.73 (s, 2H), 2.82 (q, 2H,  $J = 7.2$  Hz), 2.47 (s, 3H), 0.99 (t, 3H,  $J = 7.2$  Hz);  $^{13}\text{C NMR}$  (100 MHz,  $\text{CDCl}_3$ )  $\delta$  197.7, 151.5, 149.3, 145.0, 134.8, 133.8, 130.04, 129.60, 128.79, 128.77, 128.3, 126.1, 126.0, 124.6, 123.6, 118.0, 110.8, 54.3, 34.0, 21.8, 7.7; IR (KBr) ( $\text{cm}^{-1}$ ) 3442s, 2850w, 1665s, 1449m, 1089m, 947w; HRMS (ESI):  $m/z$  calcd for  $\text{C}_{25}\text{H}_{24}\text{NO}_4\text{S}$   $[\text{M}+\text{H}]^+$ : 434.1421; found 434.1421.

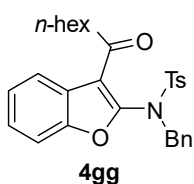

To an oven-dried sealed tube was added *o*-anisole-substituted ynamide **1a** (78.3 mg, 0.20 mmol), acyl chloride **2s** (61.9  $\mu\text{L}$ , 0.40 mmol), DCE (2.0 mL, ynamide *concn* = 0.10 M), and  $\text{SnCl}_4$  (60.0  $\mu\text{L}$ , 0.06 mmol, 1.0 M in  $\text{CH}_2\text{Cl}_2$ ) at 50 °C. The reaction vessel was capped and stirred at 50 °C for 0.5 h. After the reaction was judged to be complete by TLC, the reaction mixture was cooled to rt and filtered through a short pad of silica gel. Then the filtrate was concentrated in vacuo and purified by flash silica gel column chromatography [gradient eluent: 12:1~8:1 petroleum ether/EtOAc] to afford 3-acyl-2-amidobenzofuran **4gg** (75.0 mg, 0.15 mmol) in 77% yield.

**4gg**:  $R_f = 0.43$  [6:1 petroleum ether/EtOAc]; colorless oil;  $^1\text{H NMR}$  (400 MHz,  $\text{CDCl}_3$ )  $\delta$  8.15–8.13 (m, 1H), 7.67 (d, 2H,  $J = 8.1$  Hz), 7.35–7.30 (m, 5H), 7.24–7.20 (m, 5H), 4.74 (s, 2H), 2.76 (t, 2H,  $J =$

7.4 Hz), 2.48 (s, 3H), 1.52-1.45 (m, 2H), 1.33-1.20 (m, 6H), 0.90 (t, 3H,  $J = 6.8$  Hz);  $^{13}\text{C}$  NMR (100 MHz,  $\text{CDCl}_3$ )  $\delta$  197.5, 151.5, 149.2, 145.0, 135.0, 134.0, 130.1, 129.7, 128.9, 128.8, 128.3, 126.12, 126.09, 124.6, 123.6, 118.2, 110.8, 54.2, 40.9, 31.9, 29.0, 23.6, 22.7, 21.9, 14.3; IR (KBr) ( $\text{cm}^{-1}$ ) 3442s, 2851w, 1598m, 1365m, 1266w, 1168m; HRMS (ESI):  $m/z$  calcd for  $\text{C}_{29}\text{H}_{32}\text{NO}_4\text{S}$   $[\text{M}+\text{H}]^+$ : 490.2046; found 490.2043.

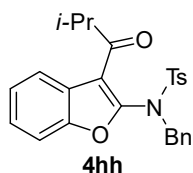

To an oven-dried sealed tube was added *o*-anisole-substituted ynamide **1a** (78.3 mg, 0.20 mmol), acyl chloride **2t** (41.4  $\mu\text{L}$ , 0.40 mmol), DCE (2.0 mL, ynamide *concn* = 0.10 M), and  $\text{SnCl}_4$  (60.0  $\mu\text{L}$ , 0.06 mmol, 1.0 M in  $\text{CH}_2\text{Cl}_2$ ) at 50  $^\circ\text{C}$ . The reaction vessel was capped and stirred at 50  $^\circ\text{C}$  for 45.0 minutes. After the reaction was judged to be complete by TLC, the reaction mixture was cooled to rt and filtered through a short pad of silica gel. Then the filtrate was concentrated in vacuo and purified by flash silica gel column chromatography [gradient eluent: 12:1~8:1 petroleum ether/EtOAc] to afford 3-acyl-2-amidobenzofuran **4hh** (72.5 mg, 0.16 mmol) in 81% yield.

**4hh**:  $R_f = 0.38$  [6:1 petroleum ether/EtOAc]; white solid; mp = 124–125  $^\circ\text{C}$ ;  $^1\text{H}$  NMR (400 MHz,  $\text{CDCl}_3$ )  $\delta$  8.04 (d, 1H,  $J = 7.1$  Hz), 7.60 (d, 2H,  $J = 8.4$  Hz), 7.33-7.28 (m, 5H), 7.27-7.24 (m, 2H), 7.23-7.20 (m, 3H), 4.76 (s, 2H), 3.60-3.50 (m, 1H), 2.45 (s, 3H), 0.91 (d, 6H,  $J = 6.8$  Hz);  $^{13}\text{C}$  NMR (100 MHz,  $\text{CDCl}_3$ )  $\delta$  202.0, 151.5, 148.6, 144.9, 134.7, 134.0, 130.1, 129.6, 128.9, 128.7, 128.1, 126.4, 126.0, 124.4, 123.2, 116.7, 110.8, 53.7, 37.4, 21.8, 18.7, one carbon missing due to overlap, overlapped signal at 21.8 ppm; IR (KBr) ( $\text{cm}^{-1}$ ) 3440s, 2853w, 1660s, 1451m, 1061m, 952w; HRMS (ESI):  $m/z$  calcd for  $\text{C}_{26}\text{H}_{26}\text{NO}_4\text{S}$   $[\text{M}+\text{H}]^+$ : 448.1577; found 448.1578.

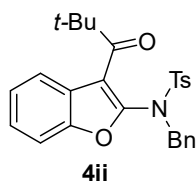

To an oven-dried sealed tube was added *o*-anisole-substituted ynamide **1a** (78.3 mg, 0.20 mmol), acyl chloride **2u** (47.8  $\mu\text{L}$ , 0.40 mmol), DCE (2.0 mL, ynamide *concn* = 0.10 M), and  $\text{SnCl}_4$  (60.0  $\mu\text{L}$ , 0.06 mmol, 1.0 M in  $\text{CH}_2\text{Cl}_2$ ) at 50  $^\circ\text{C}$ . The reaction vessel was capped and stirred at 50  $^\circ\text{C}$  for 1.0 h. After the reaction was judged to be complete by TLC, the reaction mixture was cooled to rt and filtered through a short pad of silica gel. Then the filtrate was concentrated in vacuo and purified by flash silica gel column chromatography [gradient eluent: 12:1~8:1 petroleum ether/EtOAc] to afford 3-acyl-2-amidobenzofuran **4ii** (75.7 mg, 0.16 mmol) in 82% yield.

**4ii**:  $R_f = 0.44$  [6:1 petroleum ether/EtOAc]; white solid; mp = 117–118  $^\circ\text{C}$ ;  $^1\text{H}$  NMR (400 MHz,  $\text{CDCl}_3$ )  $\delta$  7.60 (d, 2H,  $J = 8.3$  Hz), 7.43 (d, 1H,  $J = 7.9$  Hz), 7.32-7.25 (m, 4H), 7.24-7.22 (m, 3H),

7.21-7.18 (m, 3H), 4.80 (s, 2H), 2.40 (s, 3H), 1.16 (s, 9H);  $^{13}\text{C}$  NMR (100 MHz,  $\text{CDCl}_3$ )  $\delta$  206.3, 151.1, 144.6, 144.1, 135.4, 134.3, 129.9, 129.8, 128.6, 128.4, 127.9, 127.5, 125.5, 123.8, 121.4, 117.2, 111.0, 53.9, 45.2, 26.8, 21.8, two carbons missing due to overlap, overlapped signals at 26.8 ppm; IR (KBr) ( $\text{cm}^{-1}$ ) 3442s, 2923m, 2852w, 1600m, 1356m, 1170s, 1012w; HRMS (ESI):  $m/z$  calcd for  $\text{C}_{27}\text{H}_{28}\text{NO}_4\text{S}$   $[\text{M}+\text{H}]^+$ : 462.1734; found 462.1732.

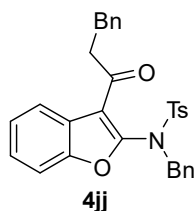

To an oven-dried sealed tube was added *o*-anisole-substituted ynamide **1a** (78.3 mg, 0.20 mmol), acyl chloride **2v** (61.3  $\mu\text{L}$ , 0.40 mmol), DCE (2.0 mL, ynamide *concn* = 0.10 *M*), and  $\text{SnCl}_4$  (60.0  $\mu\text{L}$ , 0.06 mmol, 1.0 *M* in  $\text{CH}_2\text{Cl}_2$ ) at 50  $^\circ\text{C}$ . The reaction vessel was capped and stirred at 50  $^\circ\text{C}$  for 3.0 h. After the reaction was judged to be complete by TLC, the reaction mixture was cooled to rt and filtered through a short pad of silica gel. Then the filtrate was concentrated in vacuo and purified by flash silica gel column chromatography [gradient eluent: 12:1~8:1 petroleum ether/EtOAc] to afford 3-acyl-2-amidobenzofuran **4jj** (80.6 mg, 0.16 mmol) in 79% yield.

**4jj**:  $R_f$  = 0.39 [6:1 petroleum ether/EtOAc]; mp = 102–103  $^\circ\text{C}$ ;  $^1\text{H}$  NMR (400 MHz,  $\text{CDCl}_3$ )  $\delta$  8.15-8.12 (m, 1H), 7.64 (d, 2H,  $J$  = 8.3 Hz), 7.33-7.27 (m, 7H), 7.22-7.20 (m, 1H), 7.16 (d, 3H,  $J$  = 7.2 Hz), 7.13 (d, 2H,  $J$  = 7.1 Hz), 7.08-7.05 (m, 2H), 4.71 (s, 2H), 3.11 (t, 2H,  $J$  = 7.7 Hz), 2.89 (t, 2H,  $J$  = 7.1 Hz), 2.46 (s, 3H);  $^{13}\text{C}$  NMR (100 MHz,  $\text{CDCl}_3$ )  $\delta$  196.1, 151.5, 149.4, 145.0, 141.4, 134.8, 133.7, 130.1, 129.6, 128.8, 128.7, 128.6, 128.4, 128.3, 126.2, 125.93, 125.92, 124.6, 123.5, 118.1, 110.8, 54.2, 42.0, 29.4, 21.8; IR (KBr) ( $\text{cm}^{-1}$ ) 3448s, 2923w, 1668m, 1447m, 1165s, 1011w, 934w; HRMS (ESI):  $m/z$  calcd for  $\text{C}_{31}\text{H}_{28}\text{NO}_4\text{S}$   $[\text{M}+\text{H}]^+$ : 510.1730; found 510.1734.

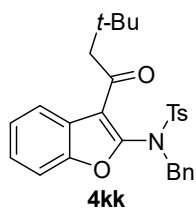

To an oven-dried sealed tube was added *o*-anisole-substituted ynamide **1a** (78.3 mg, 0.20 mmol), acyl chloride **2w** (56.1  $\mu\text{L}$ , 0.40 mmol), DCE (2.0 mL, ynamide *concn* = 0.10 *M*), and  $\text{SnCl}_4$  (60.0  $\mu\text{L}$ , 0.06 mmol, 1.0 *M* in  $\text{CH}_2\text{Cl}_2$ ) at 50  $^\circ\text{C}$ . The reaction vessel was capped and stirred at 50  $^\circ\text{C}$  for 2.5 h. After the reaction was judged to be complete by TLC, the reaction mixture was cooled to rt and filtered through a short pad of silica gel. Then the filtrate was concentrated in vacuo and purified by flash silica gel column chromatography [gradient eluent: 12:1~8:1 petroleum ether/EtOAc] to afford 3-acyl-2-amidobenzofuran **4kk** (75.3 mg, 0.16 mmol) in 79% yield.

**4kk**:  $R_f = 0.44$  [6:1 petroleum ether/EtOAc]; white solid; mp = 164–165 °C;  $^1\text{H NMR}$  (400 MHz,  $\text{CDCl}_3$ )  $\delta$  8.10–8.07 (m, 1H), 7.60 (d, 2H,  $J = 8.4$  Hz), 7.32–7.31 (m, 3H), 7.30–7.22 (m, 7H), 4.76 (s, 2H), 2.69 (s, 2H), 2.45 (s, 3H), 0.84 (s, 9H);  $^{13}\text{C NMR}$  (100 MHz,  $\text{CDCl}_3$ )  $\delta$  197.3, 151.4, 148.5, 144.9, 134.9, 134.1, 130.1, 129.8, 129.0, 128.8, 128.1, 126.1, 126.0, 124.4, 123.3, 119.0, 110.7, 53.7, 52.4, 31.4, 29.7, 21.8, two carbons missing due to overlap, overlapped signals at 29.7 ppm; IR (KBr) ( $\text{cm}^{-1}$ ) 3451s, 2928w, 1645m, 1452w, 1163m, 1008w; HRMS (ESI):  $m/z$  calcd for  $\text{C}_{28}\text{H}_{30}\text{NO}_4\text{S}$   $[\text{M}+\text{H}]^+$ : 476.1890; found 476.1887.

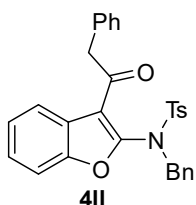

To an oven-dried sealed tube was added *o*-anisole-substituted ynamide **1a** (78.3 mg, 0.20 mmol), acyl chloride **2x** (52.9  $\mu\text{L}$ , 0.40 mmol), DCE (2.0 mL, ynamide *concn* = 0.10 M), and  $\text{SnCl}_4$  (60.0  $\mu\text{L}$ , 0.06 mmol, 1.0 M in  $\text{CH}_2\text{Cl}_2$ ) at 50 °C. The reaction vessel was capped and stirred at 50 °C for 45.0 minutes. After the reaction was judged to be complete by TLC, the reaction mixture was cooled to rt and filtered through a short pad of silica gel. Then the filtrate was concentrated in vacuo and purified by flash silica gel column chromatography [gradient eluent: 10:1~6:1 petroleum ether/EtOAc] to afford 3-acyl-2-amidobenzofuran **4ll** (78.6 mg, 0.16 mmol) in 79% yield.

**4ll**:  $R_f = 0.34$  [6:1 petroleum ether/EtOAc]; white solid; mp = 122–123 °C ;  $^1\text{H NMR}$  (400 MHz,  $\text{CDCl}_3$ )  $\delta$  8.12 (d, 1H,  $J = 7.6$  Hz), 7.67 (d, 2H,  $J = 8.2$  Hz), 7.35–7.32 (m, 4H), 7.31–7.26 (m, 6H), 7.25–7.21 (m, 3H), 6.97 (d, 2H,  $J = 7.2$  Hz), 4.79 (s, 2H), 4.13 (s, 2H), 2.48 (s, 3H);  $^{13}\text{C NMR}$  (100 MHz,  $\text{CDCl}_3$ )  $\delta$  194.4, 151.5, 149.6, 145.2, 134.7, 134.6, 133.9, 130.19, 130.15, 129.8, 129.1, 129.0, 128.34, 128.29, 126.7, 126.3, 126.0, 124.7, 123.7, 118.1, 110.7, 54.2, 47.1, 21.9; IR (KBr) ( $\text{cm}^{-1}$ ) 3455s, 3092w, 2853w, 1671m, 1449m, 1282w, 1061m; HRMS (ESI):  $m/z$  calcd for  $\text{C}_{30}\text{H}_{26}\text{NO}_4\text{S}$   $[\text{M}+\text{H}]^+$ : 496.1577; found 496.1576.

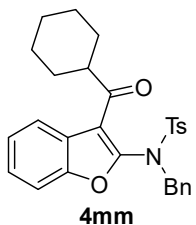

To an oven-dried sealed tube was added *o*-anisole-substituted ynamide **1a** (78.3 mg, 0.20 mmol), acyl chloride **2y** (53.7  $\mu\text{L}$ , 0.40 mmol), DCE (2.0 mL, ynamide *concn* = 0.10 M), and  $\text{SnCl}_4$  (60.0  $\mu\text{L}$ , 0.06 mmol, 1.0 M in  $\text{CH}_2\text{Cl}_2$ ) at 50 °C. The reaction vessel was capped and stirred at 50 °C for 2.0 h. After the reaction was judged to be complete by TLC, the reaction mixture was cooled to rt and filtered through a short pad of silica gel. Then the filtrate was concentrated in vacuo and purified by flash silica gel column chromatography [gradient eluent: 10:1~6:1 petroleum ether/EtOAc] to afford

3-acyl-2-amidobenzofuran **4mm** (62.7 mg, 0.13 mmol) in 64% yield.

**4mm**:  $R_f = 0.46$  [6:1 petroleum ether/EtOAc]; white solid; mp = 146–147 °C;  $^1\text{H}$  NMR (400 MHz,  $\text{CDCl}_3$ )  $\delta$  8.08-8.06 (m, 1H), 7.65 (d, 2H,  $J = 8.1$  Hz), 7.33-7.28 (m, 5H), 7.25-7.21 (m, 5H), 4.73 (s, 2H), 3.33-3.26 (m, 1H), 2.47 (s, 3H), 1.73-1.67 (m, 4H), 1.34-1.17 (m, 6H);  $^{13}\text{C}$  NMR (100 MHz,  $\text{CDCl}_3$ )  $\delta$  201.3, 151.5, 148.7, 145.0, 134.8, 134.0, 130.1, 129.6, 128.9, 128.7, 128.3, 126.6, 126.0, 124.5, 123.4, 117.0, 110.7, 53.9, 47.5, 28.9, 26.1, 25.9, 21.9; IR (KBr) ( $\text{cm}^{-1}$ ) 3446s, 2927m, 1669m, 1451m, 1165m, 950w; HRMS (ESI):  $m/z$  calcd for  $\text{C}_{29}\text{H}_{30}\text{NO}_4\text{S}$   $[\text{M}+\text{H}]^+$ : 488.1890; found 488.1888.

#### 1.4 Optimization of the Intramolecular Reaction (Table S2).

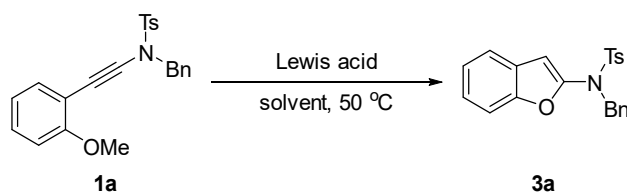

| Entry <sup>a</sup> | Acid (equiv)                                     | Solvent                  | Time (h) | Yield <sup>b</sup> (%) |
|--------------------|--------------------------------------------------|--------------------------|----------|------------------------|
| 1                  | $\text{SnCl}_4$ (0.3 eq)                         | DCE                      | 26.0     | 62                     |
| 2                  | $\text{SnCl}_4$ (0.6 eq)                         | DCE                      | 7.0      | 68                     |
| 3                  | $\text{ZnCl}_2$ (0.6 eq)                         | DCE                      | 28.0     | 70 <sup>c</sup>        |
| 4                  | $\text{ZnBr}_2$ (0.6 eq)                         | DCE                      | 30.0     | 68 <sup>d</sup>        |
| 5                  | $\text{FeCl}_3$ (0.6 eq)                         | DCE                      | 8.0      | 49                     |
| 6                  | $\text{AlCl}_3$ (0.6 eq)                         | DCE                      | 47.0     | 40                     |
| 7                  | $\text{BF}_3 \cdot \text{Et}_2\text{O}$ (0.6 eq) | DCE                      | 30.0     | 28                     |
| 8                  | $\text{SnCl}_4$ (1.0 eq)                         | DCE                      | 4.0      | 51                     |
| 9                  | $\text{ZnCl}_2$ (1.0 eq)                         | DCE                      | 11.0     | 96                     |
| 10                 | $\text{ZnBr}_2$ (1.0 eq)                         | DCE                      | 14.0     | 84                     |
| 11                 | $\text{ZnCl}_2$ (1.0 eq)                         | $\text{CH}_2\text{Cl}_2$ | 23.0     | 86                     |
| 12                 | $\text{ZnCl}_2$ (1.0 eq)                         | toluene                  | 27.0     | 91                     |
| 13                 | $\text{ZnCl}_2$ (1.0 eq)                         | THF                      | 33.0     | 35                     |
| 14                 | $\text{ZnCl}_2$ (1.0 eq)                         | EtOAc                    | 28.0     | 53                     |
| 15 <sup>e</sup>    | $\text{ZnCl}_2$ (1.0 eq)                         | DCE                      | 11.0     | 95                     |

<sup>a</sup>Unless otherwise specified, reactions were carried out using **1a** (0.20 mmol) with Lewis acid in solvent (2.0 mL) at 50 °C. <sup>b</sup>Isolated yields. <sup>c</sup>Recovery of **1a**, 27%. <sup>d</sup>Recovery of **1a**, 30%. <sup>e</sup>**1a** (1.00 mmol) was added.

Entry 15: To an oven-dried sealed tube was added *o*-anisole-substituted ynamide **1a** (391.5 mg, 1.00 mmol), DCE (10.0 mL, ynamide *concn* = 0.10 M), and  $\text{ZnCl}_2$  (136.3 mg, 1.00 mmol) at 50 °C. The reaction vessel was capped and stirred at 50 °C for 11.0 h. After the reaction was judged to be complete by TLC, the reaction mixture was cooled to rt and filtered through a short pad of silica gel. Then the filtrate was concentrated in vacuo and purified by flash silica gel column chromatography

[gradient eluent: 15:1~10:1 petroleum ether/EtOAc] to afford 3-unsubstituted 2-amidobenzofuran **3a** (358.5 mg, 0.95 mmol) in 95% yield.

## 1.5 Intramolecular Reaction of *o*-Anisole-Substituted Ynamides.

3-Unsubstituted 2-amidobenzofurans **3a**<sup>15</sup> and **3m**<sup>16</sup> were known compounds, the data were matched with the reported values. 3-Unsubstituted 2-amidobenzofurans **3b**, **3c**, **3d**, **3e**, **3f**, **3g**, **3h**, **3i**, **3j**, **3k**, **3l** and **3n** were new compounds.

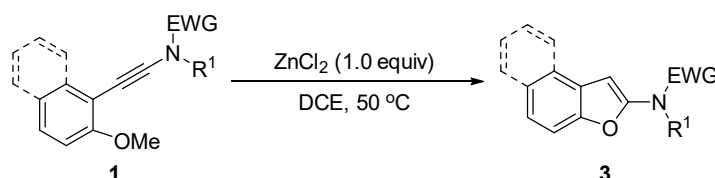

To an oven-dried sealed tube was added *o*-anisole-substituted ynamide **1a** (78.3 mg, 0.20 mmol), DCE (2.0 mL, ynamide *concn* = 0.10 M), and ZnCl<sub>2</sub> (27.3 mg, 0.20 mmol) at 50 °C. The reaction vessel was capped and stirred at 50 °C for 11.0 h. After the reaction was judged to be complete by TLC, the reaction mixture was cooled to rt and filtered through a short pad of silica gel. Then the filtrate was concentrated in vacuo and purified by flash silica gel column chromatography [gradient eluent: 15:1~10:1 petroleum ether/EtOAc] to afford 3-unsubstituted 2-amidobenzofuran **3a** (72.4 mg, 0.19 mmol) in 96% yield.

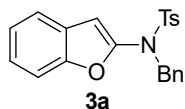

**3a**:  $R_f$  = 0.46 [8:1 petroleum ether/EtOAc]; white solid; mp = 112–113 °C; <sup>1</sup>H NMR (400 MHz, CDCl<sub>3</sub>)  $\delta$  7.66 (d, 2H,  $J$  = 8.3 Hz), 7.46-7.43 (m, 1H), 7.31-7.29 (m, 4H), 7.27-7.24 (m, 3H), 7.23-7.21 (m, 2H), 7.17 (td, 1H,  $J$  = 7.4, 1.3 Hz), 6.48 (d, 1H,  $J$  = 0.6 Hz), 4.80 (s, 2H), 2.43 (s, 3H); <sup>13</sup>C NMR (100 MHz, CDCl<sub>3</sub>)  $\delta$  152.4, 147.8, 144.4, 135.8, 135.4, 129.9, 128.64, 128.57, 128.1, 128.0, 127.8, 124.6, 123.1, 121.3, 111.1, 103.1, 53.3, 21.8. Spectral data are in agreement with literature values.<sup>13</sup>

To an oven-dried sealed tube was added *o*-anisole-substituted ynamide **1b** (81.5 mg, 0.20 mmol), DCE (2.0 mL, ynamide *concn* = 0.10 M), and ZnCl<sub>2</sub> (27.3 mg, 0.20 mmol) at 50 °C. The reaction vessel was capped and stirred at 50 °C for 9.0 h. After the reaction was judged to be complete by TLC, the reaction mixture was cooled to rt and filtered through a short pad of silica gel. Then the filtrate was concentrated in vacuo and purified by flash silica gel column chromatography [gradient eluent: 12:1~8:1 petroleum ether/EtOAc] to afford 3-unsubstituted 2-amidobenzofuran **3b** (63.6 mg, 0.16 mmol) in 81% yield.

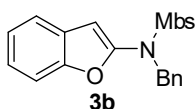

**3b:**  $R_f = 0.30$  [8:1 petroleum ether/EtOAc]; white solid; mp = 127–128 °C;  $^1\text{H NMR}$  (400 MHz,  $\text{CDCl}_3$ )  $\delta$  7.70 (d, 2H,  $J = 8.4$  Hz), 7.43 (d, 1H,  $J = 7.6$  Hz), 7.31-7.29 (m, 3H), 7.26-7.19 (m, 4H), 7.16 (td, 1H,  $J = 7.2, 0.8$  Hz), 6.93 (dt, 2H,  $J = 8.9, 3.0$  Hz), 6.47-6.46 (m, 1H), 4.79 (s, 2H), 3.84 (s, 3H);  $^{13}\text{C NMR}$  (100 MHz,  $\text{CDCl}_3$ )  $\delta$  163.5, 152.4, 147.9, 135.5, 130.3, 129.9, 128.62, 128.56, 128.0, 124.6, 123.1, 121.3, 114.4, 111.1, 103.0, 55.8, 53.3, one carbon missing due to overlap, overlapped signal at 128.56 ppm; IR (KBr) ( $\text{cm}^{-1}$ ) 3442s, 2917w, 1579m, 1454m, 1354m, 1160s; HRMS (ESI):  $m/z$  calcd for  $\text{C}_{22}\text{H}_{20}\text{NO}_4\text{S}$   $[\text{M}+\text{H}]^+$ : 394.1108; found 394.1108.

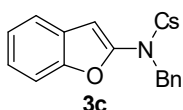

To an oven-dried sealed tube was added *o*-anisole-substituted ynamide **1c** (82.4 mg, 0.20 mmol), DCE (2.0 mL, ynamide *concn* = 0.10 M), and  $\text{ZnCl}_2$  (27.3 mg, 0.20 mmol) at 50 °C. The reaction vessel was capped and stirred at 50 °C for 35.0 h. After the reaction was judged to be complete by TLC, the reaction mixture was cooled to rt and filtered through a short pad of silica gel. Then the filtrate was concentrated in vacuo and purified by flash silica gel column chromatography [gradient eluent: 15:1~10:1 petroleum ether/EtOAc] to afford 3-unsubstituted 2-amidobenzofuran **3c** (76.6 mg, 0.19 mmol) in 96% yield.

**3c:**  $R_f = 0.48$  [8:1 petroleum ether/EtOAc]; white solid; mp = 70–71 °C;  $^1\text{H NMR}$  (400 MHz,  $\text{CDCl}_3$ )  $\delta$  7.68 (dt, 2H,  $J = 8.6, 2.6$  Hz), 7.45-7.40 (m, 3H), 7.31-7.27 (m, 3H), 7.26-7.20 (m, 4H), 7.16 (td, 1H,  $J = 7.5, 1.3$  Hz), 6.49 (d, 1H,  $J = 1.0$  Hz), 4.80 (s, 2H);  $^{13}\text{C NMR}$  (100 MHz,  $\text{CDCl}_3$ )  $\delta$  152.4, 147.2, 140.0, 137.4, 135.1, 129.6, 129.1, 128.7, 128.6, 128.2, 127.8, 124.9, 123.3, 121.4, 111.1, 103.5, 53.6; IR (KBr) ( $\text{cm}^{-1}$ ) 3448s, 2920w, 1648w, 1452m, 1357s, 1165s; HRMS (ESI):  $m/z$  calcd for  $\text{C}_{21}\text{H}_{17}\text{ClNO}_3\text{S}$   $[\text{M}+\text{H}]^+$ : 398.0612; found 398.0615.

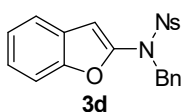

To an oven-dried sealed tube was added *o*-anisole-substituted ynamide **1d** (84.5 mg, 0.20 mmol), DCE (2.0 mL, ynamide *concn* = 0.10 M), and  $\text{ZnCl}_2$  (27.3 mg, 0.20 mmol) at 50 °C. The reaction vessel was capped and stirred at 50 °C for 48.0 h. After the reaction was judged to be complete by TLC, the reaction mixture was cooled to rt and filtered through a short pad of silica gel. Then the filtrate was concentrated in vacuo and purified by flash silica gel column chromatography [gradient eluent: 15:1~10:1 petroleum ether/EtOAc] to afford 3-unsubstituted 2-amidobenzofuran **3d** (78.9 mg, 0.19 mmol) in 97% yield.

**3d:**  $R_f = 0.41$  [8:1 petroleum ether/EtOAc]; yellow solid; mp = 143–144 °C;  $^1\text{H NMR}$  (400 MHz,

CDCl<sub>3</sub>)  $\delta$  8.28 (dt, 2H,  $J = 8.9, 2.5$  Hz), 7.90 (dt, 2H,  $J = 8.9, 2.5$  Hz), 7.47 (d, 1H,  $J = 7.4$  Hz), 7.32-7.28 (m, 3H), 7.26-7.23 (m, 4H), 7.20 (td, 1H,  $J = 7.6, 1.4$  Hz), 6.54 (d, 1H,  $J = 0.4$  Hz), 4.84 (s, 2H); <sup>13</sup>C NMR (100 MHz, CDCl<sub>3</sub>)  $\delta$  152.5, 150.4, 146.4, 144.7, 134.6, 129.0, 128.8, 128.7, 128.5, 127.7, 125.2, 124.4, 123.5, 121.6, 111.2, 104.2, 54.0; IR (KBr) (cm<sup>-1</sup>) 3442s, 2917w, 11610m, 1451m, 1167s, 1088w; HRMS (ESI):  $m/z$  calcd for C<sub>21</sub>H<sub>17</sub>N<sub>2</sub>O<sub>2</sub>S [M+H]<sup>+</sup>: 409.0853; found 409.0856.

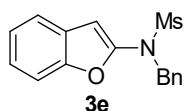

To an oven-dried sealed tube was added *o*-anisole-substituted ynamide **1e** (63.1 mg, 0.20 mmol), DCE (2.0 mL, ynamide *concn* = 0.10 M), and ZnCl<sub>2</sub> (27.3 mg, 0.20 mmol) at 50 °C. The reaction vessel was capped and stirred at 50 °C for 23.0 h. After the reaction was judged to be complete by TLC, the reaction mixture was cooled to rt and filtered through a short pad of silica gel. Then the filtrate was concentrated in vacuo and purified by flash silica gel column chromatography [gradient eluent: 12:1~8:1 petroleum ether/EtOAc] to afford 3-unsubstituted 2-amidobenzofuran **3e** (58.8 mg, 0.20 mmol) in 98% yield.

**3e**:  $R_f = 0.28$  [8:1 petroleum ether/EtOAc]; white solid; mp = 70–71 °C; <sup>1</sup>H NMR (400 MHz, CDCl<sub>3</sub>)  $\delta$  7.45 (d, 1H,  $J = 7.7$  Hz), 7.40 (d, 1H,  $J = 8.3$  Hz), 7.36-7.33 (m, 2H), 7.31-7.25 (m, 4H), 7.21-7.17 (m, 1H), 6.45 (s, 1H), 4.90 (s, 2H), 3.03 (s, 3H); <sup>13</sup>C NMR (100 MHz, CDCl<sub>3</sub>)  $\delta$  152.5, 147.7, 135.5, 128.8, 128.7, 128.3, 128.0, 124.9, 123.3, 121.5, 111.2, 102.8, 54.0, 40.1; IR (KBr) (cm<sup>-1</sup>) 3039s, 3108w, 2926w, 1454m, 1349s, 1041w; HRMS (ESI):  $m/z$  calcd for C<sub>16</sub>H<sub>16</sub>NO<sub>3</sub>S [M+H]<sup>+</sup>: 302.0845; found 302.0845.

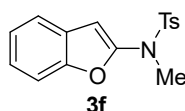

To an oven-dried sealed tube was added *o*-anisole-substituted ynamide **1f** (63.1 mg, 0.20 mmol), DCE (2.0 mL, ynamide *concn* = 0.10 M), and ZnCl<sub>2</sub> (27.3 mg, 0.20 mmol) at 50 °C. The reaction vessel was capped and stirred at 50 °C for 24.0 h. After the reaction was judged to be complete by TLC, the reaction mixture was cooled to rt and filtered through a short pad of silica gel. Then the filtrate was concentrated in vacuo and purified by flash silica gel column chromatography [gradient eluent: 15:1~10:1 petroleum ether/EtOAc] to afford 3-unsubstituted 2-amidobenzofuran **3f** (36.8 mg, 0.12 mmol) in 61% yield.

**3f**:  $R_f = 0.45$  [8:1 petroleum ether/EtOAc]; white solid; mp = 77–78 °C; <sup>1</sup>H NMR (400 MHz, CDCl<sub>3</sub>)  $\delta$  7.62 (dt, 2H,  $J = 8.4, 2.1$  Hz), 7.53-7.50 (m, 1H), 7.33-7.30 (m, 1H), 7.28-7.24 (m, 3H), 7.23-7.21 (m, 1H), 6.56 (d, 1H,  $J = 0.9$  Hz), 3.27 (s, 3H), 2.41 (s, 3H); <sup>13</sup>C NMR (100 MHz, CDCl<sub>3</sub>)  $\delta$  152.1, 149.7, 144.5, 134.3, 129.9, 128.2, 127.8, 124.4, 123.3, 121.2, 111.1, 99.6, 36.7, 21.7; IR (KBr) (cm<sup>-1</sup>)



3439s, 2923w, 1597w, 1358m, 1166s, 1056w; HRMS (ESI):  $m/z$  calcd for  $C_{16}H_{16}NO_3S$   $[M+H]^+$ : 302.0845; found 302.0842.

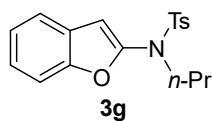

To an oven-dried sealed tube was added *o*-anisole-substituted ynamide **1g** (68.7 mg, 0.20 mmol), DCE (2.0 mL, ynamide *concn* = 0.10 M), and  $ZnCl_2$  (27.3 mg, 0.20 mmol) at 50 °C. The reaction vessel was capped and stirred at 50 °C for 26.0 h. After the reaction was judged to be complete by TLC, the reaction mixture was cooled to rt and filtered through a short pad of silica gel. Then the filtrate was concentrated in vacuo and purified by flash silica gel column chromatography [gradient eluent: 20:1~15:1 petroleum ether/EtOAc] to afford 3-unsubstituted 2-amidobenzofuran **3g** (42.3 mg, 0.13 mmol) in 64% yield.

**3g**:  $R_f$  = 0.51 [10:1 petroleum ether/EtOAc]; white solid; mp = 68–69 °C;  $^1H$  NMR (400 MHz,  $CDCl_3$ )  $\delta$  7.64 (d, 2H,  $J$  = 8.3 Hz), 7.54–7.52 (m, 1H), 7.33 (d, 1H,  $J$  = 8.0 Hz), 7.28–7.20 (m, 4H), 6.62 (d, 1H,  $J$  = 0.7 Hz), 3.57 (t, 2H,  $J$  = 7.2 Hz), 2.42 (s, 3H), 1.60–1.51 (m, 2H), 0.92 (t, 3H,  $J$  = 7.4 Hz);  $^{13}C$  NMR (100 MHz,  $CDCl_3$ )  $\delta$  152.5, 148.1, 144.1, 135.8, 129.8, 128.1, 127.7, 124.7, 123.2, 121.3, 111.2, 103.0, 51.4, 21.9, 21.8, 11.1; IR (KBr) ( $cm^{-1}$ ) 3424m, 1597m, 1453m, 1356s, 1254w, 1164s, 1054m; HRMS (ESI):  $m/z$  calcd for  $C_{18}H_{20}NO_3S$   $[M+H]^+$ : 330.1158; found 330.1161.

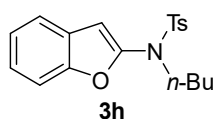

To an oven-dried sealed tube was added *o*-anisole-substituted ynamide **1h** (71.5 mg, 0.20 mmol), DCE (2.0 mL, ynamide *concn* = 0.10 M), and  $ZnCl_2$  (27.3 mg, 0.20 mmol) at 50 °C. The reaction vessel was capped and stirred at 50 °C for 22.0 h. After the reaction was judged to be complete by TLC, the reaction mixture was cooled to rt and filtered through a short pad of silica gel. Then the filtrate was concentrated in vacuo and purified by flash silica gel column chromatography [gradient eluent: 15:1~10:1 petroleum ether/EtOAc] to afford 3-unsubstituted 2-amidobenzofuran **3h** (45.3 mg, 0.13 mmol) in 66% yield.

**3h**:  $R_f$  = 0.49 [8:1 petroleum ether/EtOAc]; colorless oil;  $^1H$  NMR (400 MHz,  $CDCl_3$ )  $\delta$  7.65 (d, 2H,  $J$  = 8.3 Hz), 7.54–7.52 (m, 1H), 7.35–7.32 (m, 1H), 7.28–7.25 (m, 3H), 7.24–7.20 (m, 1H), 6.61 (d, 1H,  $J$  = 0.6 Hz), 3.60 (t, 2H,  $J$  = 7.2 Hz), 2.42 (s, 3H), 1.55–1.47 (m, 2H), 1.40–1.33 (m, 2H), 0.87 (t, 3H,  $J$  = 7.3 Hz);  $^{13}C$  NMR (100 MHz,  $CDCl_3$ )  $\delta$  152.5, 148.2, 144.1, 135.8, 129.8, 128.1, 127.7, 124.7, 123.2, 121.3, 111.2, 103.0, 49.5, 30.6, 21.7, 19.7, 13.7; IR (KBr) ( $cm^{-1}$ ) 3442s, 2870w, 1611m, 1454m, 1257w, 1169s, 1093w; HRMS (ESI):  $m/z$  calcd for  $C_{19}H_{22}NO_3S$   $[M+H]^+$ : 344.1315; found 344.1320.

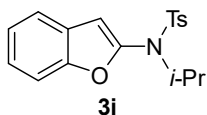

To an oven-dried sealed tube was added *o*-anisole-substituted ynamide **1i** (68.7 mg, 0.20 mmol), DCE (2.0 mL, ynamide *concn* = 0.10 M), and ZnCl<sub>2</sub> (27.3 mg, 0.20 mmol) at 50 °C. The reaction vessel was capped and stirred at 50 °C for 24.0 h. After the reaction was judged to be complete by TLC, the reaction mixture was cooled to rt and filtered through a short pad of silica gel. Then the filtrate was concentrated in vacuo and purified by flash silica gel column chromatography [gradient eluent: 10:1~8:1 petroleum ether/EtOAc] to afford 3-unsubstituted 2-amidobenzofuran **3i** (46.1 mg, 0.14 mmol) in 70% yield.

**3i**:  $R_f$  = 0.55 [10:1 petroleum ether/EtOAc]; white solid; mp = 128–129 °C; <sup>1</sup>H NMR (400 MHz, CDCl<sub>3</sub>)  $\delta$  7.79 (d, 2H,  $J$  = 8.0 Hz), 7.56 (d, 1H,  $J$  = 7.6 Hz), 7.43 (d, 1H,  $J$  = 8.2 Hz), 7.34-7.30 (m, 3H), 7.26-7.22 (m, 1H), 6.58 (s, 1H), 4.44-4.34 (m, 1H), 2.45 (s, 3H), 1.12 (d, 6H,  $J$  = 6.7 Hz); <sup>13</sup>C NMR (100 MHz, CDCl<sub>3</sub>)  $\delta$  153.1, 145.5, 143.9, 137.5, 129.8, 127.83, 127.77, 125.2, 123.1, 121.5, 111.6, 106.8, 52.4, 21.9, 21.8; IR (KBr) (cm<sup>-1</sup>) 3451w, 1608m, 1453m, 1345s, 1167s, 1084m, 1010m; HRMS (ESI):  $m/z$  calcd for C<sub>18</sub>H<sub>20</sub>NO<sub>3</sub>S [M+H]<sup>+</sup>: 330.1158; found 330.1155.

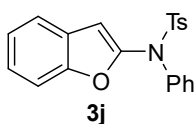

To an oven-dried sealed tube was added *o*-anisole-substituted ynamide **1j** (75.5 mg, 0.20 mmol), DCE (2.0 mL, ynamide *concn* = 0.10 M), and ZnCl<sub>2</sub> (27.3 mg, 0.20 mmol) at 50 °C. The reaction vessel was capped and stirred at 50 °C for 22.0 h. After the reaction was judged to be complete by TLC, the reaction mixture was cooled to rt and filtered through a short pad of silica gel. Then the filtrate was concentrated in vacuo and purified by flash silica gel column chromatography [gradient eluent: 15:1~10:1 petroleum ether/EtOAc] to afford 3-unsubstituted 2-amidobenzofuran **3j** (53.2 mg, 0.15 mmol) in 73% yield.

**3j**:  $R_f$  = 0.47 [8:1 petroleum ether/EtOAc]; white solid; mp = 134–135 °C; <sup>1</sup>H NMR (400 MHz, CDCl<sub>3</sub>)  $\delta$  7.64 (dt, 2H,  $J$  = 8.3, 2.2 Hz), 7.53-7.50 (m, 1H), 7.37-7.34 (m, 3H), 7.33-7.30 (m, 3H), 7.28-7.23 (m, 3H), 7.20 (td, 1H,  $J$  = 8.5, 1.1 Hz), 6.66 (d, 1H,  $J$  = 0.9 Hz), 2.43 (s, 3H); <sup>13</sup>C NMR (100 MHz, CDCl<sub>3</sub>)  $\delta$  152.6, 148.8, 144.5, 139.2, 135.9, 129.7, 129.4, 128.6, 128.5, 128.3, 127.9, 125.0, 123.2, 121.5, 111.4, 102.8, 21.8; IR (KBr) (cm<sup>-1</sup>) 3442s, 2848w, 1599w, 1362m, 1161s, 1074w; HRMS (ESI):  $m/z$  calcd for C<sub>21</sub>H<sub>18</sub>NO<sub>3</sub>S [M+H]<sup>+</sup>: 364.1002; found 364.1005.

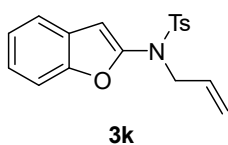

To an oven-dried sealed tube was added *o*-anisole-substituted ynamide **1k** (68.3 mg, 0.20 mmol), DCE (2.0 mL, ynamide *concn* = 0.10 M), and ZnCl<sub>2</sub> (27.3 mg, 0.20 mmol) at 50 °C. The reaction

vessel was capped and stirred at 50 °C for 7.0 h. After the reaction was judged to be complete by TLC, the reaction mixture was cooled to rt and filtered through a short pad of silica gel. Then the filtrate was concentrated in vacuo and purified by flash silica gel column chromatography [gradient eluent: 15:1~10:1 petroleum ether/EtOAc] to afford 3-unsubstituted 2-amidobenzofuran **3k** (47.1 mg, 0.14 mmol) in 72% yield.

**3k**:  $R_f$  = 0.45 [8:1 petroleum ether/EtOAc]; white solid; mp = 63–64 °C;  $^1\text{H}$  NMR (400 MHz,  $\text{CDCl}_3$ )  $\delta$  7.66 (d, 2H,  $J$  = 8.3 Hz), 7.53–7.51 (m, 1H), 7.32 (d, 1H,  $J$  = 8.1 Hz), 7.29–7.25 (m, 3H), 7.21 (td, 1H,  $J$  = 7.4, 1.5 Hz), 6.59 (s, 1H), 5.87–5.77 (m, 1H), 5.20 (dd, 1H,  $J$  = 17.1, 1.4 Hz), 5.11 (dd, 1H,  $J$  = 10.1, 1.2 Hz), 4.24 (dt, 2H,  $J$  = 6.3, 1.4 Hz), 2.43 (s, 3H);  $^{13}\text{C}$  NMR (100 MHz,  $\text{CDCl}_3$ )  $\delta$  152.5, 148.1, 144.3, 135.8, 132.1, 129.9, 128.0, 127.8, 124.7, 123.2, 121.3, 119.6, 111.2, 102.8, 52.5, 21.8; IR (KBr) ( $\text{cm}^{-1}$ ) 3436m, 2922w, 1593m, 1453m, 1356s, 1090m; HRMS (ESI):  $m/z$  calcd for  $\text{C}_{18}\text{H}_{18}\text{NO}_3\text{S}$   $[\text{M}+\text{H}]^+$ : 328.1002; found 328.1002.

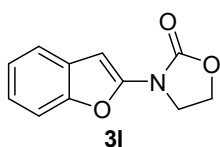

To an oven-dried sealed tube was added *o*-anisole-substituted ynamide **1l** (43.4 mg, 0.20 mmol), DCE (2.0 mL, ynamide *concn* = 0.10 *M*), and  $\text{ZnCl}_2$  (27.3 mg, 0.20 mmol) at 50 °C. The reaction vessel was capped and stirred at 50 °C for 26.0 h. After the reaction was judged to be complete by TLC, the reaction mixture was cooled to rt and filtered through a short pad of silica gel. Then the filtrate was concentrated in vacuo and purified by flash silica gel column chromatography [gradient eluent: 6:1~2:1 petroleum ether/EtOAc] to afford 3-unsubstituted 2-amidobenzofuran **3l** (34.5 mg, 0.17 mmol) in 85% yield.

**3l**:  $R_f$  = 0.34 [2:1 petroleum ether/EtOAc]; white solid; mp = 145–146 °C;  $^1\text{H}$  NMR (400 MHz,  $\text{CDCl}_3$ )  $\delta$  7.50–7.47 (m, 1H), 7.39–7.36 (m, 1H), 7.24–7.17 (m, 2H), 7.65 (d, 1H,  $J$  = 0.7 Hz), 4.54 (t, 2H,  $J$  = 7.6 Hz), 4.22 (t, 2H,  $J$  = 8.4 Hz);  $^{13}\text{C}$  NMR (100 MHz,  $\text{CDCl}_3$ )  $\delta$  153.9, 150.6, 147.8, 129.3, 123.6, 122.9, 120.5, 110.5, 89.6, 62.8, 44.2. IR (KBr) ( $\text{cm}^{-1}$ ) 3448m, 2923w, 1754s, 1604s, 1416s, 1113m, 1016w; HRMS (ESI):  $m/z$  calcd for  $\text{C}_{11}\text{H}_{10}\text{NO}_3$   $[\text{M}+\text{H}]^+$ : 204.0655; found 204.0654.

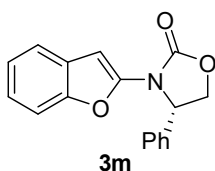

To an oven-dried sealed tube was added *o*-anisole-substituted ynamide **1m** (58.7 mg, 0.20 mmol), DCE (2.0 mL, ynamide *concn* = 0.10 *M*), and  $\text{ZnCl}_2$  (27.3 mg, 0.20 mmol) at 50 °C. The reaction vessel was capped and stirred at 50 °C for 50.0 h. After the reaction was judged to be complete by TLC, the reaction mixture was cooled to rt and filtered through a short pad of silica gel. Then the filtrate was concentrated in vacuo and purified by flash silica gel column chromatography [gradient

eluent: 10:1~6:1 petroleum ether/EtOAc] to afford 3-unsubstituted 2-amidobenzofuran **3m** (43.6 mg, 0.16 mmol) in 78% yield.

**3m**:  $R_f = 0.22$  [6:1 petroleum ether/EtOAc]; white solid; mp = 128–129 °C;  $^1\text{H}$  NMR (400 MHz,  $\text{CDCl}_3$ )  $\delta$  7.42–7.40 (m, 1H), 7.35–7.27 (m, 5H), 7.25–7.22 (m, 1H), 7.15–7.09 (m, 2H), 6.60 (s, 1H), 5.50 (dd, 1H,  $J = 8.7, 5.0$  Hz), 4.80 (t, 1H,  $J = 8.7$  Hz), 4.30 (dd, 1H,  $J = 8.8, 5.0$  Hz);  $^{13}\text{C}$  NMR (100 MHz,  $\text{CDCl}_3$ ):  $\delta$  154.2, 150.9, 146.8, 138.3, 129.3, 129.1, 128.7, 126.3, 123.3, 123.2, 120.6, 110.7, 93.2, 70.8, 59.9. Spectral data are in agreement with literature values.<sup>14</sup>

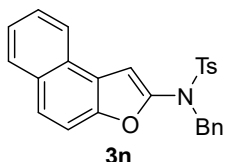

To an oven-dried sealed tube was added *o*-anisole-substituted ynamide **1n** (88.3 mg, 0.20 mmol), DCE (2.0 mL, ynamide *concn* = 0.10 M), and  $\text{ZnCl}_2$  (27.3 mg, 0.20 mmol) at 50 °C. The reaction vessel was capped and stirred at 50 °C for 22.0 h. After the reaction was judged to be complete by TLC, the reaction mixture was cooled to rt and filtered through a short pad of silica gel. Then the filtrate was concentrated in vacuo and purified by flash silica gel column chromatography [gradient eluent: 15:1~10:1 petroleum ether/EtOAc] to afford 3-unsubstituted 2-amidobenzofuran **3n** (83.2 mg, 0.19 mmol) in 97% yield.

**3n**:  $R_f = 0.40$  [8:1 petroleum ether/EtOAc]; white solid; mp = 115–116 °C;  $^1\text{H}$  NMR (400 MHz,  $\text{CDCl}_3$ )  $\delta$  7.95 (d, 1H,  $J = 8.2$  Hz), 7.83 (d, 1H,  $J = 8.0$  Hz), 7.67–7.61 (m, 3H), 7.51–7.47 (m, 1H), 7.44–7.39 (m, 2H), 7.31 (d, 2H,  $J = 7.0$  Hz), 7.24–7.17 (m, 5H), 6.97 (s, 1H), 4.84 (s, 2H), 2.37 (s, 3H);  $^{13}\text{C}$  NMR (100 MHz,  $\text{CDCl}_3$ )  $\delta$  149.8, 146.9, 144.3, 135.8, 135.4, 130.3, 129.9, 128.8, 128.6, 128.1, 127.7, 127.5, 126.6, 125.6, 124.9, 123.6, 123.3, 112.0, 102.8, 53.6, 21.7, one carbon missing due to overlap, overlapped signal at 128.6 ppm; IR (KBr) ( $\text{cm}^{-1}$ ) 3438s, 2922w, 1629w, 1575w, 1360m, 1114s; HRMS (ESI):  $m/z$  calcd for  $\text{C}_{26}\text{H}_{22}\text{NO}_3\text{S}$   $[\text{M}+\text{H}]^+$ : 428.1315; found 428.1305.

## 1.6 Cyclizations of Other *o*-Alkyloxyphenyl-Substituted Ynamides (Scheme 2).

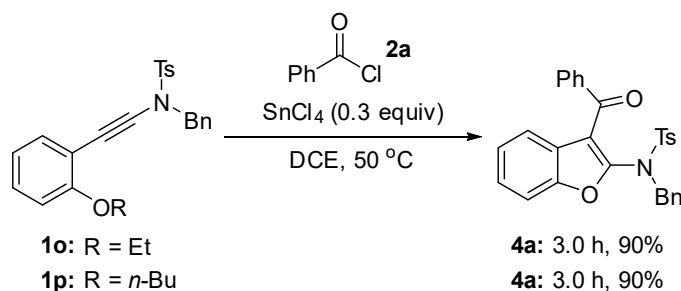

To an oven-dried sealed tube was added *o*-alkyloxyphenyl-substituted ynamide **1o** (81.1 mg, 0.2 mmol) or **1p** (86.7 mg, 0.2 mmol), acyl chloride **2a** (46.4  $\mu\text{L}$ , 0.40 mmol), DCE (2.0 mL, ynamide

*concn* = 0.10 M), and SnCl<sub>4</sub> (60.0 μL, 0.06 mmol, 1.0 M in CH<sub>2</sub>Cl<sub>2</sub>) at 50 °C. The reaction vessel was capped and stirred at 50 °C for the corresponding reaction time. The reaction mixture was cooled to rt and filtered through a short pad of silica gel. Then the filtrate was concentrated in vacuo and purified by flash silica gel column chromatography [gradient eluent: 10:1~6:1 petroleum ether/EtOAc] to afford 3-acyl-2-amidobenzofuran **4a**.

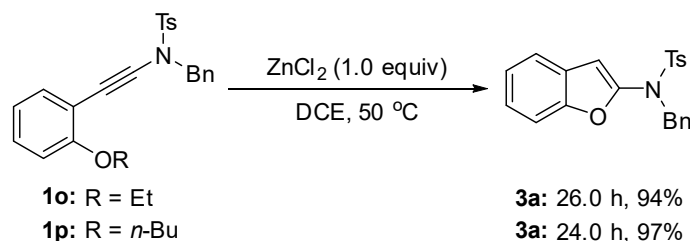

To an oven-dried sealed tube was added *o*-alkoxyphenyl-substituted ynamide **1o** (81.1 mg, 0.2 mmol) or **1p** (86.7 mg, 0.2 mmol), DCE (2.0 mL, ynamide *concn* = 0.10 M), and ZnCl<sub>2</sub> (27.3 mg, 0.20 mmol). The reaction vessel was capped and stirred at 50 °C for the corresponding reaction time. The reaction mixture was cooled to rt and filtered through a short pad of silica gel. Then the filtrate was concentrated in vacuo and purified by flash silica gel column chromatography [gradient eluent: 15:1~10:1 petroleum ether/EtOAc] to afford 3-unsubstituted 2-amidobenzofuran **3a**.

## 1.7 Gram-Scale Synthesis and Chemical Transformations (Scheme 3).

### Gram-Scale Intermolecular Cyclization.

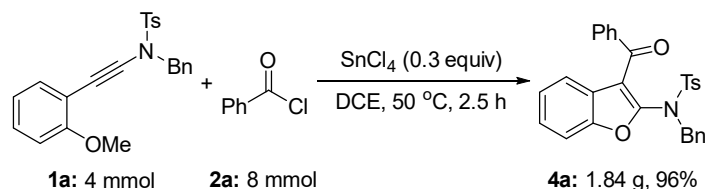

To an oven-dried sealed tube was added *o*-anisole-substituted ynamide **1a** (1.57 g, 4.00 mmol), acyl chloride **2a** (0.93 mL, 8.00 mmol), DCE (40.0 mL, ynamide *concn* = 0.10 M), and SnCl<sub>4</sub> (1.20 mL, 1.20 mmol, 1.0 M in CH<sub>2</sub>Cl<sub>2</sub>) at 50 °C. The reaction vessel was capped and stirred at 50 °C for 2.5 h. After the reaction was judged to be complete by TLC, the reaction mixture was cooled to rt and filtered through a short pad of silica gel. Then the filtrate was concentrated in vacuo and purified by flash silica gel column chromatography [gradient eluent: 10:1~6:1 petroleum ether/EtOAc] to afford 3-acyl-2-amidobenzofuran **4a** (1.84 g, 3.82 mmol) in 96% yield.

### Gram-Scale Intramolecular Cyclization.

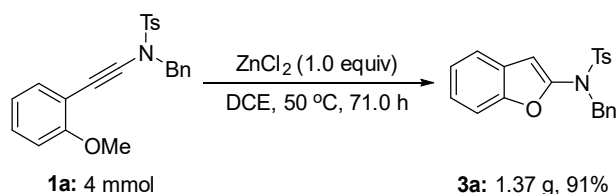

To an oven-dried sealed tube was added *o*-anisole-substituted ynamide **1a** (1.57 g, 4.00 mmol), DCE (40.0 mL, ynamide *concn* = 0.10 M), and ZnCl<sub>2</sub> (545.12 mg, 4.00 mmol) at 50 °C. The reaction vessel was capped and stirred at 50 °C for 71.0 h. After the reaction was judged to be complete by TLC, the reaction mixture was cooled to rt and filtered through a short pad of silica gel. Then the filtrate was concentrated in vacuo and purified by flash silica gel column chromatography [gradient eluent: 15:1~10:1 petroleum ether/EtOAc] to afford 3-unsubstituted 2-amidobenzofuran **3a** (1.37 g, 3.63 mmol) in 91% yield.

### Synthesis of 3-Acyl-2-Amidobenzofurans **5a**, **5b** and **5c**.

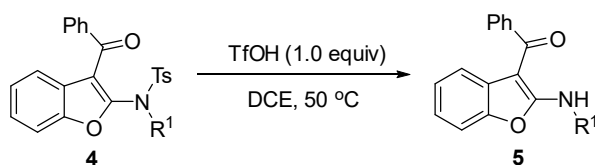

To an oven-dried sealed tube was added 3-acyl-2-amidobenzofuran **4a** (96.3 mg, 0.20 mmol), DCE (2.0 mL), and TfOH (17.7 μL, 0.20 mmol) in sequence. The reaction vessel was capped and stirred at 50 °C in an oil bath for 6.0 h. After the reaction was judged to be complete by TLC, the reaction mixture was cooled to rt and filtered through a short pad of silica gel. Then the filtrate was concentrated in vacuo and purified by flash silica gel column chromatography [gradient eluent: 10:1~6:1 petroleum ether/EtOAc] to afford 3-acyl-2-amidobenzofuran **5a** (64.4 mg, 0.20 mmol) in 98% yield.

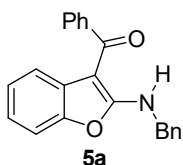

**5a**:  $R_f$  = 0.40 [6:1 petroleum ether/EtOAc]; yellow solid; mp = 120–121 °C; <sup>1</sup>H NMR (400 MHz, CDCl<sub>3</sub>) δ 9.34 (t, 1H,  $J$  = 6.3 Hz), 7.70–7.67 (m, 2H), 7.52–7.45 (m, 3H), 7.42–7.35 (m, 4H), 7.33–7.24 (m, 2H), 7.05–6.97 (m, 2H), 6.89–6.87 (m, 1H), 4.81 (d, 2H,  $J$  = 6.4 Hz); <sup>13</sup>C NMR (100 MHz, CDCl<sub>3</sub>) δ 190.0, 166.7, 149.6, 141.2, 137.3, 130.8, 129.0, 128.5, 128.0, 127.6, 127.5, 126.7, 124.0, 121.7, 118.9, 110.3, 94.0, 46.1; IR (KBr) (cm<sup>-1</sup>) 3432s, 2923w, 1642s, 1553w, 1478w, 1182m; HRMS (ESI):  $m/z$  calcd for C<sub>22</sub>H<sub>18</sub>NO<sub>2</sub> [M+H]<sup>+</sup>: 328.1332; found 328.1329.

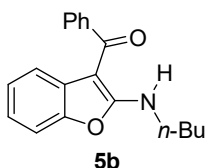

To an oven-dried sealed tube was added 3-acyl-2-amidobenzofuran **4h** (89.5 mg, 0.20 mmol), DCE (2.0 mL), and TfOH (17.7 μL, 0.20 mmol) in sequence. The reaction vessel was capped and

stirred at 50 °C in an oil bath for 5.0 h. After the reaction was judged to be complete by TLC, the reaction mixture was cooled to rt and filtered through a short pad of silica gel. Then the filtrate was concentrated in vacuo and purified by flash silica gel column chromatography [gradient eluent: 10:1~6:1 petroleum ether/EtOAc] to afford 3-acyl-2-amidobenzofuran **5b** (54.2 mg, 0.18 mmol) in 92% yield.

**5b**:  $R_f$  = 0.42 [6:1 petroleum ether/EtOAc]; yellow solid; mp = 87–88 °C;  $^1\text{H}$  NMR (400 MHz,  $\text{CDCl}_3$ )  $\delta$  9.06 (t, 1H,  $J$  = 6.3 Hz), 7.69-7.66 (m, 2H), 7.54-7.45 (m, 3H), 7.26-7.24 (m, 1H), 7.03-6.95 (m, 2H), 6.86-6.83 (m, 1H), 3.62 (dd, 2H,  $J$  = 13.5, 6.8 Hz), 1.77-1.69 (m, 2H), 1.54-1.44 (m, 2H), 0.99 (t, 3H,  $J$  = 7.4 Hz);  $^{13}\text{C}$  NMR (100 MHz,  $\text{CDCl}_3$ )  $\delta$  189.6, 167.1, 149.6, 141.4, 130.6, 128.5, 127.5, 126.8, 123.9, 121.5, 118.7, 110.2, 93.7, 42.0, 32.2, 20.1, 13.9; IR (KBr) ( $\text{cm}^{-1}$ ) 3440s, 2963w, 1645s, 1592w, 1494w, 1182m; HRMS (ESI):  $m/z$  calcd for  $\text{C}_{19}\text{H}_{20}\text{NO}_2$   $[\text{M}+\text{H}]^+$ : 294.1489; found 294.1487.

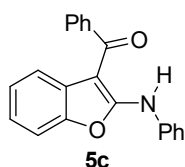

To an oven-dried sealed tube was added 3-acyl-2-amidobenzofuran **4j** (93.5 mg, 0.20 mmol), DCE (2.0 mL), and TfOH (17.7  $\mu\text{L}$ , 0.20 mmol) in sequence. The reaction vessel was capped and stirred at 50 °C in an oil bath for 6.0 h. After the reaction was judged to be complete by TLC, the reaction mixture was cooled to rt and filtered through a short pad of silica gel. Then the filtrate was concentrated in vacuo and purified by flash silica gel column chromatography [gradient eluent: 15:1~10:1 petroleum ether/EtOAc] to afford 3-acyl-2-amidobenzofuran **5c** (58.8 mg, 0.19 mmol) in 94% yield.

**5c**:  $R_f$  = 0.60 [6:1 petroleum ether/EtOAc]; yellow solid; mp = 122–123 °C;  $^1\text{H}$  NMR (400 MHz,  $\text{CDCl}_3$ )  $\delta$  11.3 (s, 1H), 7.75-7.73 (m, 2H), 7.59-7.49 (m, 5H), 7.45-7.41 (m, 2H), 7.38 (d, 1H,  $J$  = 7.7 Hz), 7.19 (t, 1H,  $J$  = 7.4 Hz), 7.10 (td, 1H,  $J$  = 7.5, 1.2 Hz), 7.05 (td, 1H,  $J$  = 7.8, 1.0 Hz), 6.96-6.94 (m, 1H);  $^{13}\text{C}$  NMR (100 MHz,  $\text{CDCl}_3$ )  $\delta$  190.7, 163.0, 149.7, 140.9, 137.2, 131.2, 129.7, 128.6, 127.7, 125.6, 124.6, 124.3, 122.5, 120.1, 119.3, 110.7, 95.5; IR (KBr) ( $\text{cm}^{-1}$ ) 3440s, 2921w, 1638s, 1561m, 1457w, 1167m; HRMS (ESI):  $m/z$  calcd for  $\text{C}_{21}\text{H}_{16}\text{NO}_2$   $[\text{M}+\text{H}]^+$ : 314.1176; found 314.1166.

### Synthesis of 3-Alkyl-2-Amidobenzofurans **6a**, **6b** and **6c**.<sup>17</sup>

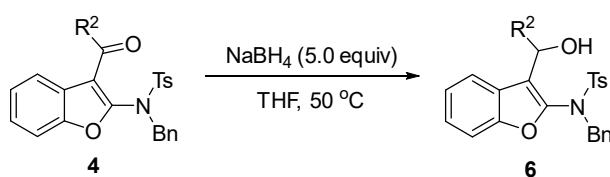

To an oven-dried sealed tube was added 3-acyl-2-amidobenzofuran **4a** (96.3 mg, 0.20 mmol), THF

(2.0 mL), and NaBH<sub>4</sub> (37.8 mg, 1.00 mmol) in sequence. The reaction vessel was capped and stirred at 50 °C in an oil bath for 24.0 h. After the reaction was judged to be complete by TLC, the reaction mixture was cooled to rt and filtered through a short pad of silica gel. Then the filtrate was concentrated in vacuo and purified by flash silica gel column chromatography [gradient eluent: 10:1~6:1 petroleum ether/EtOAc] to afford 3-alkyl-2-amidobenzofuran **6a** (93.4 mg, 0.19 mmol) in 97% yield.

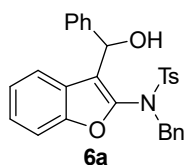

**6a**:  $R_f$  = 0.38 [6:1 petroleum ether/EtOAc]; white solid; mp = 142–143 °C; <sup>1</sup>H NMR (400 MHz, CDCl<sub>3</sub>)  $\delta$  7.71 (d, 2H,  $J$  = 8.0 Hz), 7.35 (d, 2H,  $J$  = 8.1 Hz), 7.31-7.23 (m, 6H), 7.19-7.14 (m, 4H), 6.96-6.86 (m, 4H), 5.85 (s, 1H), 4.98 (d, 1H,  $J$  = 10.6 Hz), 4.51 (d, 1H,  $J$  = 12.6 Hz), 2.48 (s, 3H); <sup>13</sup>C NMR (100 MHz, CDCl<sub>3</sub>)  $\delta$  152.5, 144.8, 144.1, 140.7, 135.2, 134.7, 130.1, 129.5, 129.1, 128.6, 128.04, 127.98, 126.9, 125.81, 125.78, 125.2, 123.0, 122.0, 121.4, 111.0, 66.3, 53.4, 21.9; IR (KBr) (cm<sup>-1</sup>) 3449s, 2848w, 1632w, 1451m, 1164s; HRMS (ESI):  $m/z$  calcd for C<sub>29</sub>H<sub>25</sub>NO<sub>4</sub>SNa [M+Na]<sup>+</sup>: 506.1396; found 506.1392.

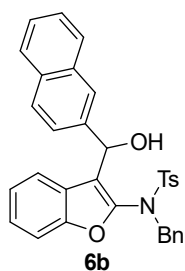

To an oven-dried sealed tube was added 3-acyl-2-amidobenzofuran **4bb** (106.3 mg, 0.20 mmol), THF (2.0 mL), and NaBH<sub>4</sub> (37.8 mg, 1.00 mmol) in sequence. The reaction vessel was capped and stirred at 50 °C in an oil bath for 24.0 h. After the reaction was judged to be complete by TLC, the reaction mixture was cooled to rt and filtered through a short pad of silica gel. Then the filtrate was concentrated in vacuo and purified by flash silica gel column chromatography [gradient eluent: 10:1~6:1 petroleum ether/EtOAc] to afford 3-alkyl-2-amidobenzofuran **6b** (105.8 mg, 0.20 mmol) in 99% yield.

**6b**:  $R_f$  = 0.33 [6:1 petroleum ether/EtOAc]; white solid; mp = 115–116 °C; <sup>1</sup>H NMR (400 MHz, CDCl<sub>3</sub>)  $\delta$  7.76-7.70 (m, 5H), 7.53 (d, 1H,  $J$  = 8.2 Hz), 7.44-7.37 (m, 2H), 7.34-7.23 (m, 8H), 7.15-7.10 (m, 1H), 6.84-6.81 (m, 2H), 6.60 (s, 1H), 6.01 (s, 1H), 5.02 (s, 1H), 4.51 (d, 1H,  $J$  = 11.5 Hz), 2.44 (s, 3H); <sup>13</sup>C NMR (100 MHz, CDCl<sub>3</sub>)  $\delta$  152.5, 144.9, 144.2, 138.2, 135.1, 134.7, 133.2, 132.6, 130.1, 129.5, 129.1, 128.7, 128.3, 128.0, 127.64, 127.59, 125.9, 125.8, 125.7, 125.2, 124.4, 124.0, 123.0, 122.0, 121.1, 111.0, 66.4, 53.3, 21.8; IR (KBr) (cm<sup>-1</sup>) 3441s, 2923w, 1626w, 1450m,



1352s, 1235w, 1165s; HRMS (ESI):  $m/z$  calcd for  $C_{33}H_{27}NO_4SNa$   $[M+Na]^+$ : 556.1553; found 556.1550.

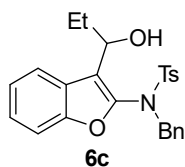

To an oven-dried sealed tube was added 3-acyl-2-amidobenzofuran **4ff** (86.7 mg, 0.20 mmol), THF (2.0 mL), and  $NaBH_4$  (37.8 mg, 1.00 mmol) in sequence. The reaction vessel was capped and stirred at 50 °C in an oil bath for 72.0 h. After the reaction was judged to be complete by TLC, the reaction mixture was cooled to rt and filtered through a short pad of silica gel. Then the filtrate was concentrated in vacuo and purified by flash silica gel column chromatography [gradient eluent: 10:1~6:1 petroleum ether/EtOAc] to afford 3-alkyl-2-amidobenzofuran **6c** (84.3 mg, 0.19 mmol) in 97% yield.

**6c**:  $R_f$  = 0.33 [6:1 petroleum ether/EtOAc]; colorless oil;  $^1H$  NMR (400 MHz,  $CDCl_3$ )  $\delta$  7.71 (d, 1H,  $J$  = 7.8 Hz), 7.65 (d, 2H,  $J$  = 8.3 Hz), 7.32-7.26 (m, 4H), 7.23-7.16 (m, 6H), 4.83 (d, 1H,  $J$  = 11.6 Hz), 4.56-4.46 (m, 2H), 2.46 (s, 3H), 1.97-1.86 (m, 1H), 1.61-1.50 (m, 1H), 0.56 (t, 3H,  $J$  = 7.9 Hz);  $^{13}C$  NMR (100 MHz,  $CDCl_3$ )  $\delta$  152.4, 144.6, 143.3, 135.4, 134.7, 130.0, 129.4, 128.7, 128.4, 128.0, 126.2, 125.2, 123.0, 121.9, 121.2, 111.2, 68.0, 53.3, 27.7, 21.8, 10.3; IR (KBr) ( $cm^{-1}$ ) 3432s, 2963w, 1631m, 1452m, 1357m, 1236w, 1166s; HRMS (ESI):  $m/z$  calcd for  $C_{25}H_{25}NO_4SNa$   $[M+Na]^+$ : 458.1396; found 458.1392.

## References

- 1 K. Jouvin, A. Coste, A. Bayle, F. Legrand, G. Karthikeyan, K. Tadiparthi and G. Evano, Copper-mediated selective cross-coupling of 1,1-dibromo-1-alkenes and heteronucleophiles: development of general routes to heterosubstituted alkynes and alkenes. *Organometallics*, 2012, **31**, 7933-7947.
- 2 T. Okitsu, K. Nakata, K. Nishigaki, N. Michioka, M. Karatani and A. Wada, Iodocyclization of ethoxyethyl ethers to ynamides: an immediate construction to benzo[*b*]furans. *J. Org. Chem.*, 2014, **79**, 5914-5920.
- 3 D. Rodríguez, L. Castedo and C. Saá, New Alkynyl Amides by Negishi Coupling. *Synlett*, 2004, 783-786.
- 4 L. Zhao, H. Yang, R. Li, Y. Tao, X. Guo, E. A. Anderson, A. Whiting and N. Wu, Synthesis of sulfonamide-based ynamides and ynamines in water. *J. Org. Chem.*, 2021, **86**, 1938-1947.
- 5 L. Wang, C. Lu, Y. Yue and C. Feng, Visible-light-promoted oxo-sulfonylation of ynamides with sulfonic acids. *Org. Lett.*, 2019, **21**, 3514-3517.
- 6 Y. Zhang, R. P. Hsung, M. R. Tracey, K. C. M. Kurtz and E. L. Vera, E. L., Copper sulfate-pentahydrate-1,10-phenanthroline catalyzed amidations of alkynyl bromides. synthesis of heteroaromatic amine substituted ynamides. *Org. Lett.*, 2004, **6**, 1151-1154.
- 7 D. Campeau, A. Pommerville and F. Gagosz, Ynamides as three-atom components in cycloadditions: an

- unexplored chemical reaction space. *J. Am. Chem. Soc.*, 2021, **143**, 9601-9611.
- 8 P. S. Hellwig, J. S. Guedes, A. M. Barcellos, R. G. Jacob, C. C. Silveira, E. J. Lenardão and G. Perin, Synthesis of benzo[*b*]chalcogenophenes fused to selenophenes *via* intramolecular electrophilic cyclization of 1,3-diynes. *Org. Biomol. Chem.*, 2021, **19**, 596-604.
  - 9 V. Dwivedi, M. Hari Babu, R. Kant and M. Sridhar Reddy, *N*-Substitution dependent stereoselectivity switch in palladium catalyzed hydroalkynylation of ynamides: a regio and stereoselective synthesis of ynenamides. *Chem. Commun.*, 2015, **51**, 14996-14999.
  - 10 P. J. Smith, Y. Jiang, Z. Tong, H. D. Pickford, K. E. Christensen, J. Nugent and E. A. Anderson, Synthesis of polysubstituted fused pyrroles by gold-Catalyzed cycloisomerization/1,2-sulfonyl migration of yndiamides. *Org. Lett.*, 2021, **23**, 6547-6552.
  - 11 Z. Zhang, P. Qian and Z. Zha, Copper-catalyzed aerobic oxidative coupling of aromatic sulfonyl hydrazides with amines: a new access to aromatic sulfonamides. *Chin. J. Org. Chem.*, 2019, **39**, 1316.
  - 12 Z. Tong, O. L. Garry, P. J. Smith, Y. Jiang, S. J. Mansfield and E. A. Anderson, Au(I)-Catalyzed oxidative functionalization of yndiamides. *Org. Lett.*, 2021, **23**, 4888-4892.
  - 13 S. Engl and O. Reiser, Catalyst-free visible-light-mediated iodoamination of olefins and synthetic applications. *Org. Lett.*, 2021, **23**, 5581-5586.
  - 14 S. Arora and T. R. Hoye, "Kobayashi Benzynes" as hexadehydro-Diels-Alder diynophiles. *Org. Lett.*, 2021, **23**, 3349-3353.
  - 15 K. Dooleweerd, T. Ruhland and T. Skrydstrup, Application of ynamides in the synthesis of 2-amidoindoles. *Org. Lett.*, 2009, **11**, 221-224.
  - 16 J. Oppenheimer, W. L. Johnson, M. R. Tracey, R. P. Hsung, P.-Y. Yao, R. Liu and K. Zhao, A rhodium(I)-catalyzed demethylation-cyclization of *o*-anisole-substituted ynamides in the synthesis of chiral 2-amido 2-amidobenzofurans. *Org. Lett.*, 2007, **9**, 2361-2364.
  - 17 J. Zhang, M. Guo, Y. Chen, S. Zhang, X.-N. Wang and J. Chang, Synthesis of amino-substituted  $\alpha$ - and  $\delta$ -carbolines *via* metal-free [2 + 2 + 2] cycloaddition of functionalized alkyne-nitriles with ynamides. *Org. Lett.*, 2019, **21**, 1331-1336.

## Part II Copies of $^1\text{H}$ NMR and $^{13}\text{C}$ NMR Spectra.

### $^1\text{H}$ NMR and $^{13}\text{C}$ NMR Spectra of *o*-Alkyloxyphenyl-Substituted Ynamides 1.

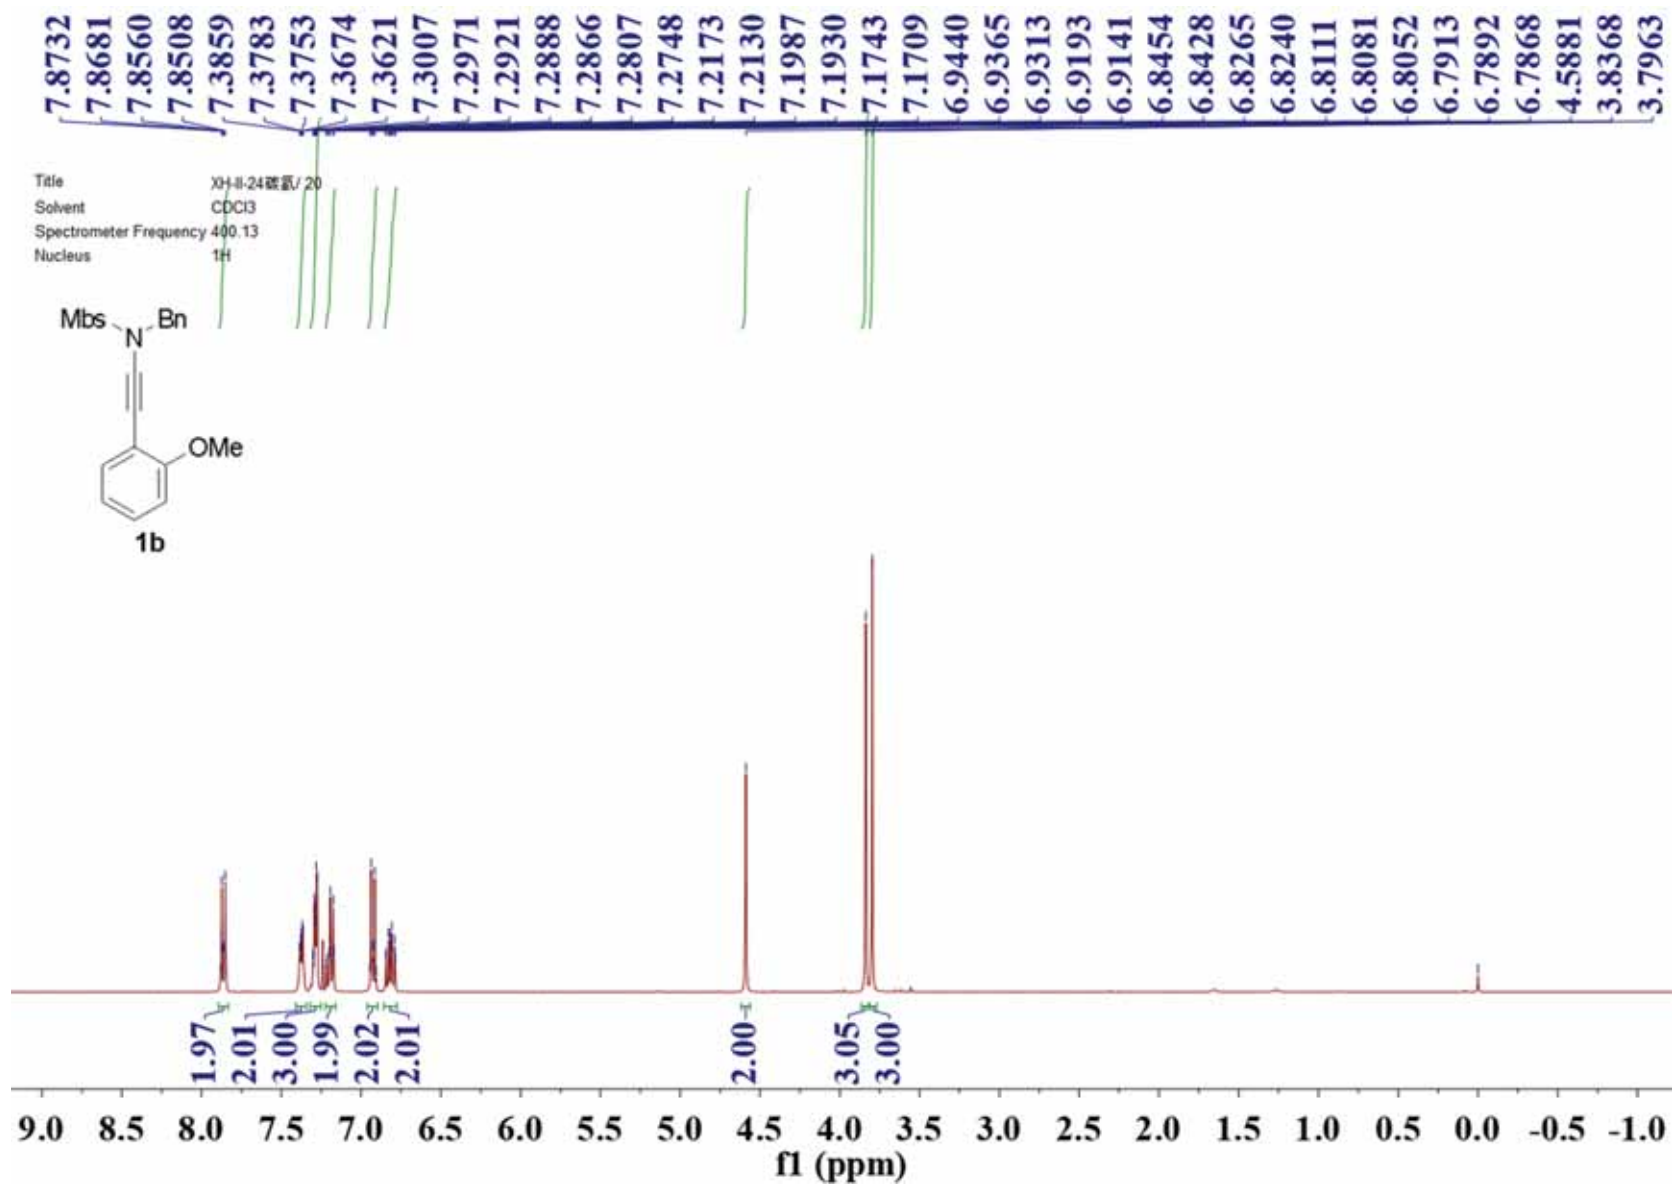

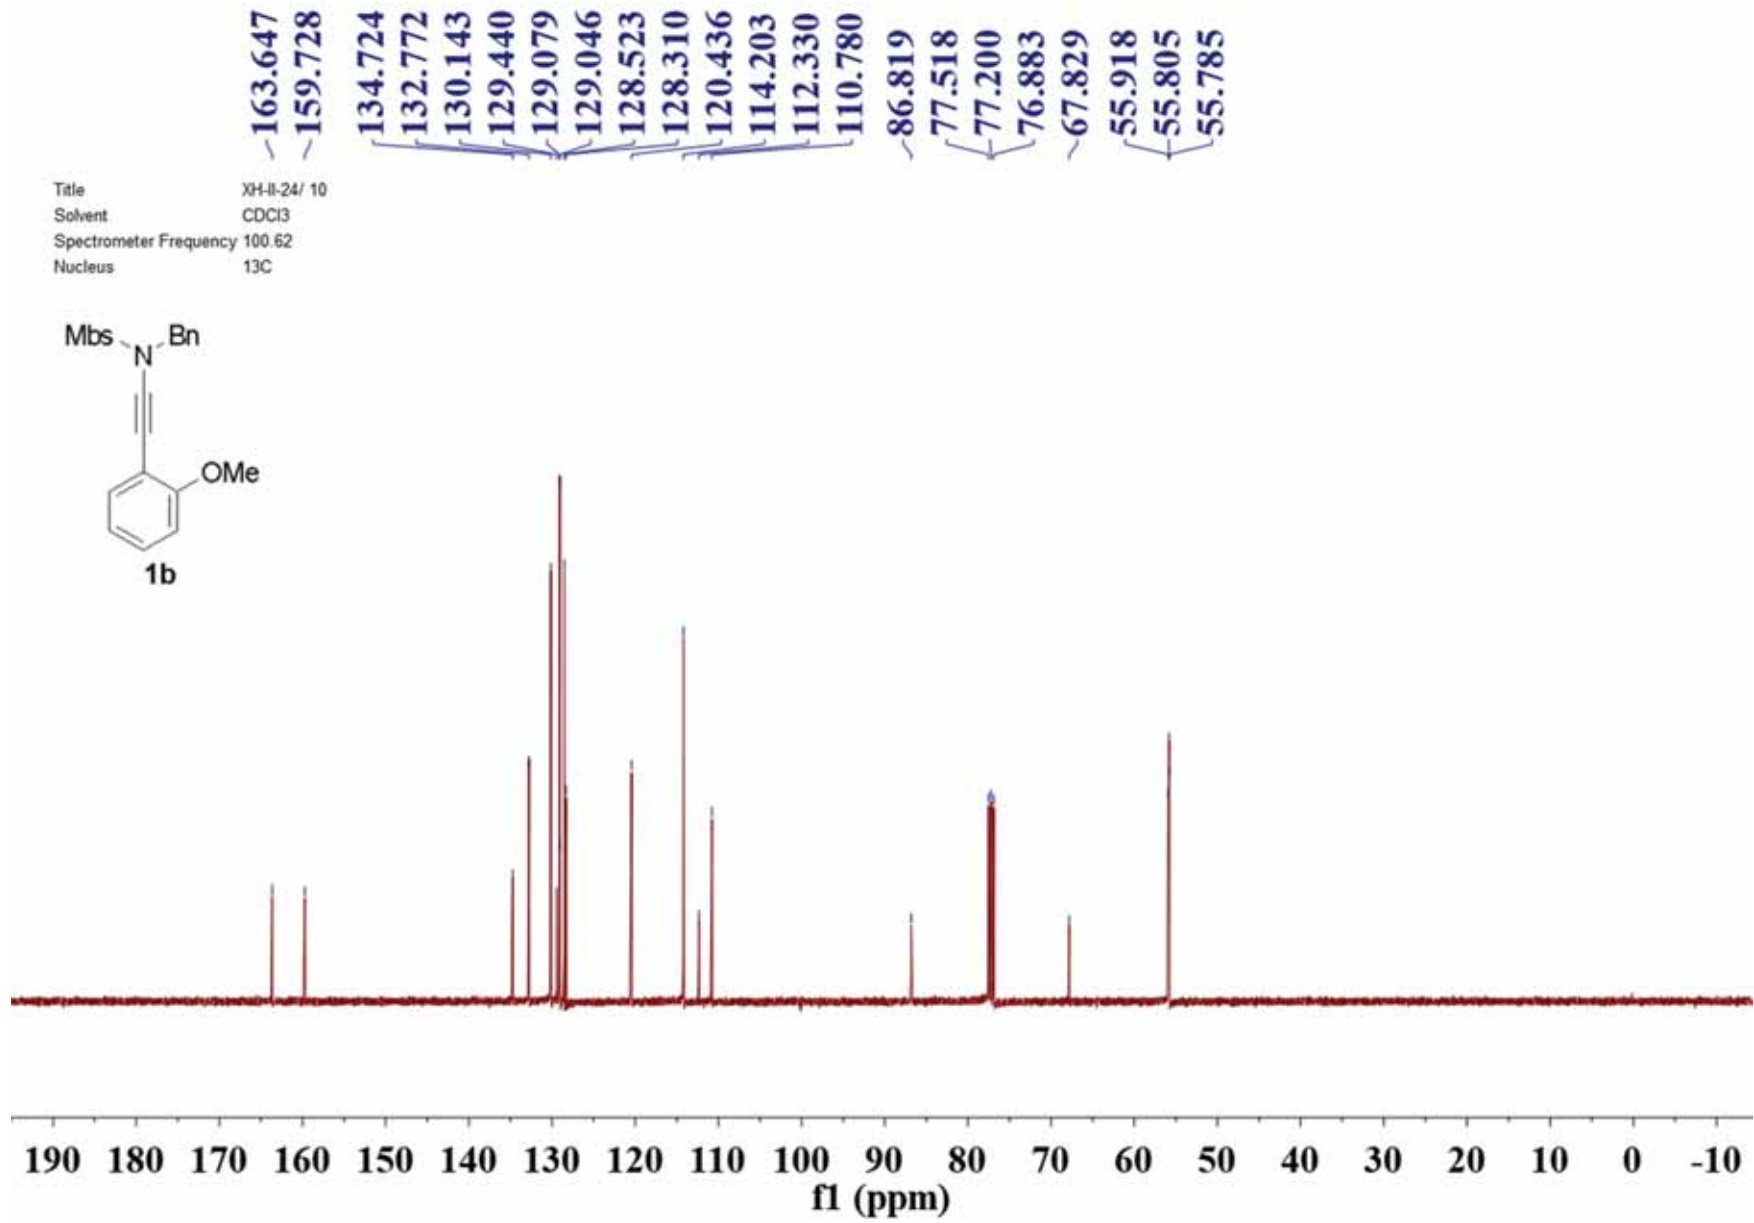

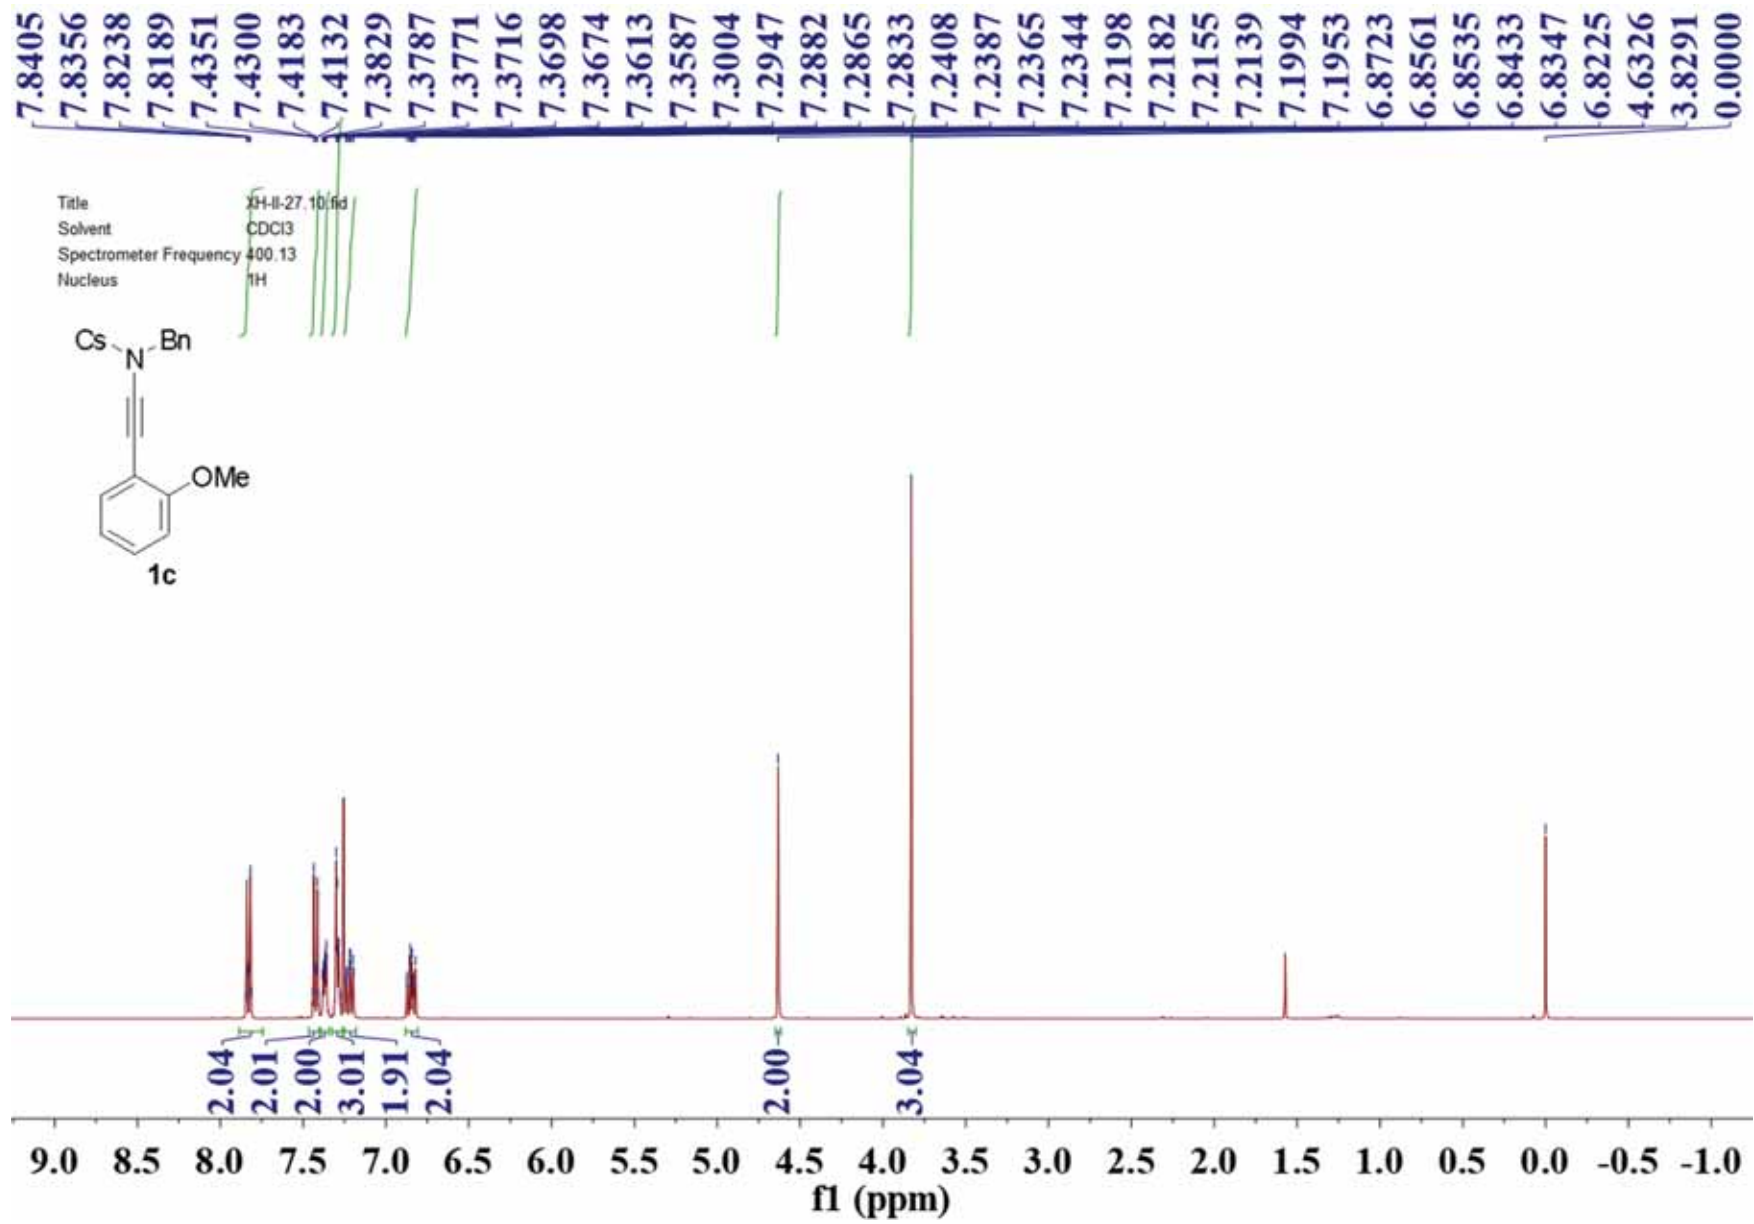

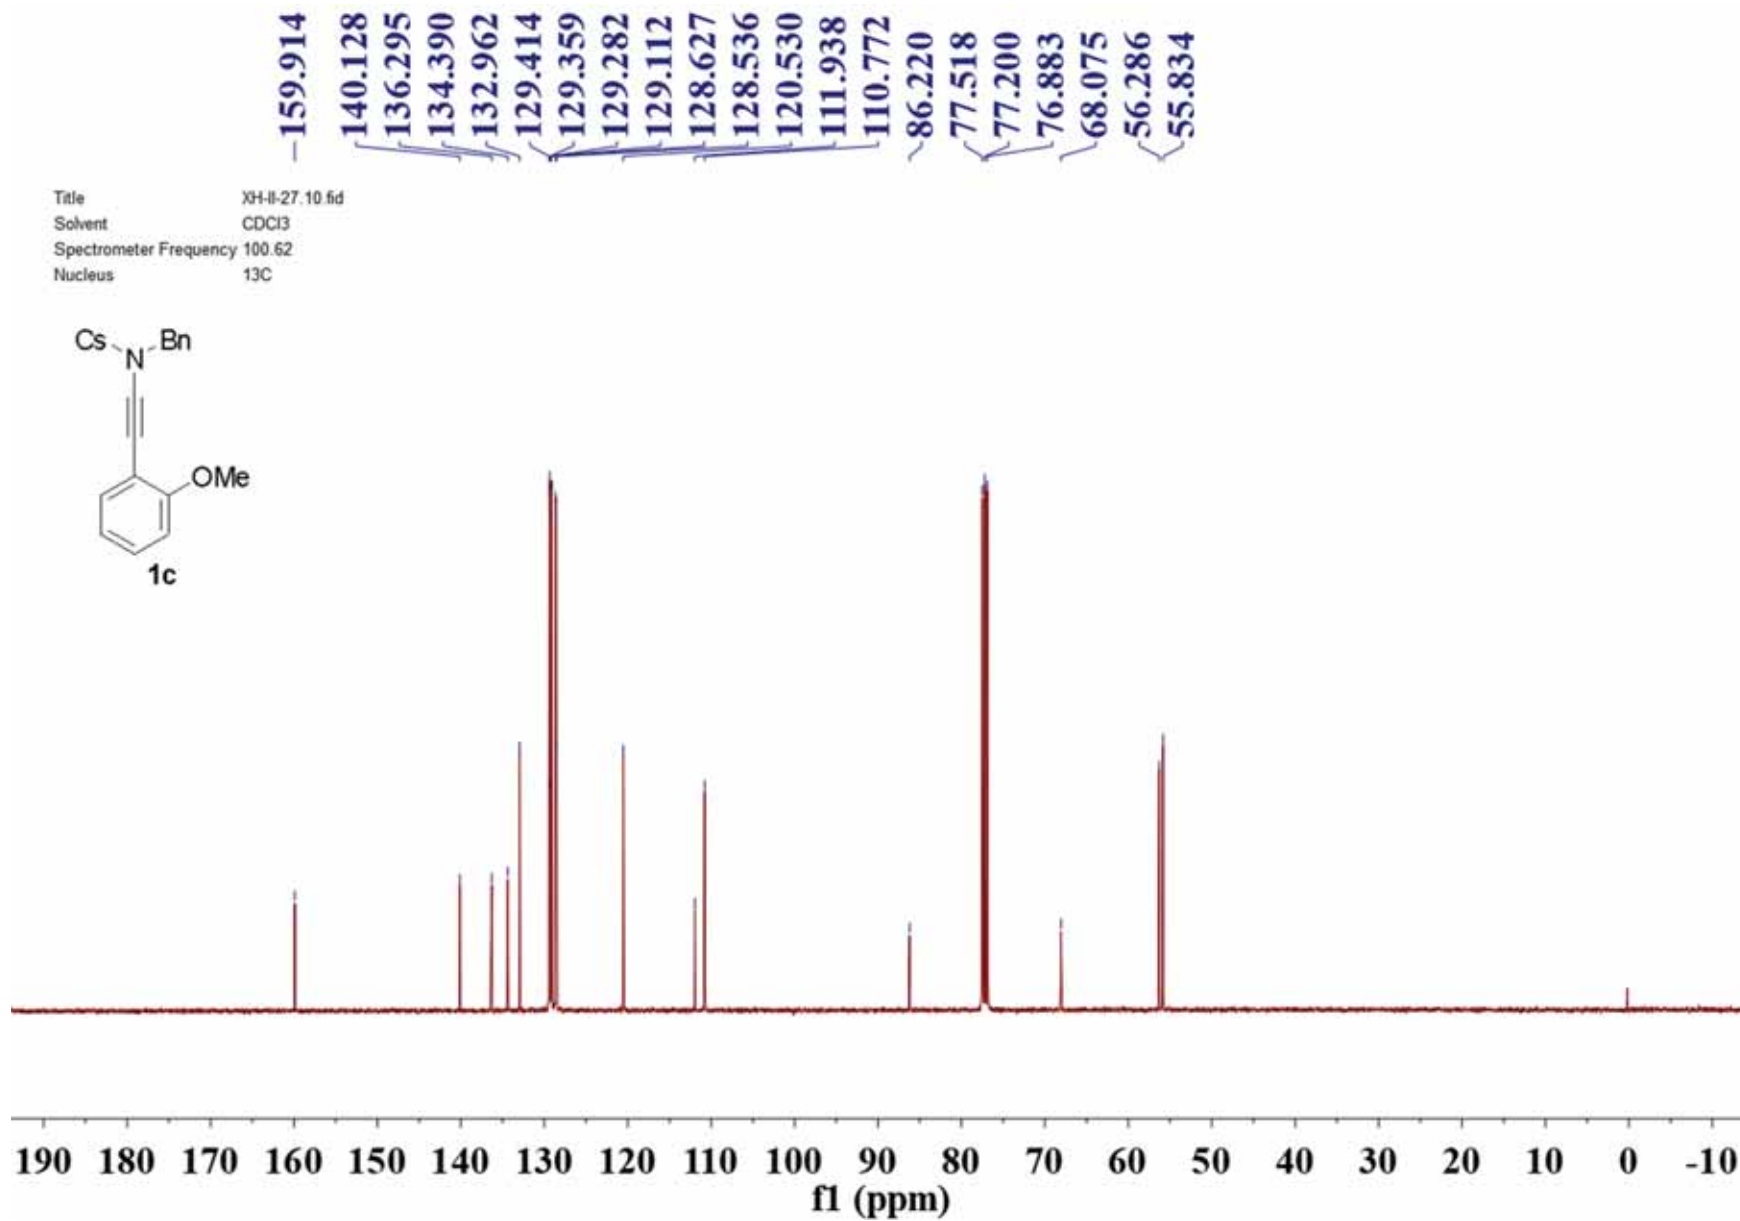

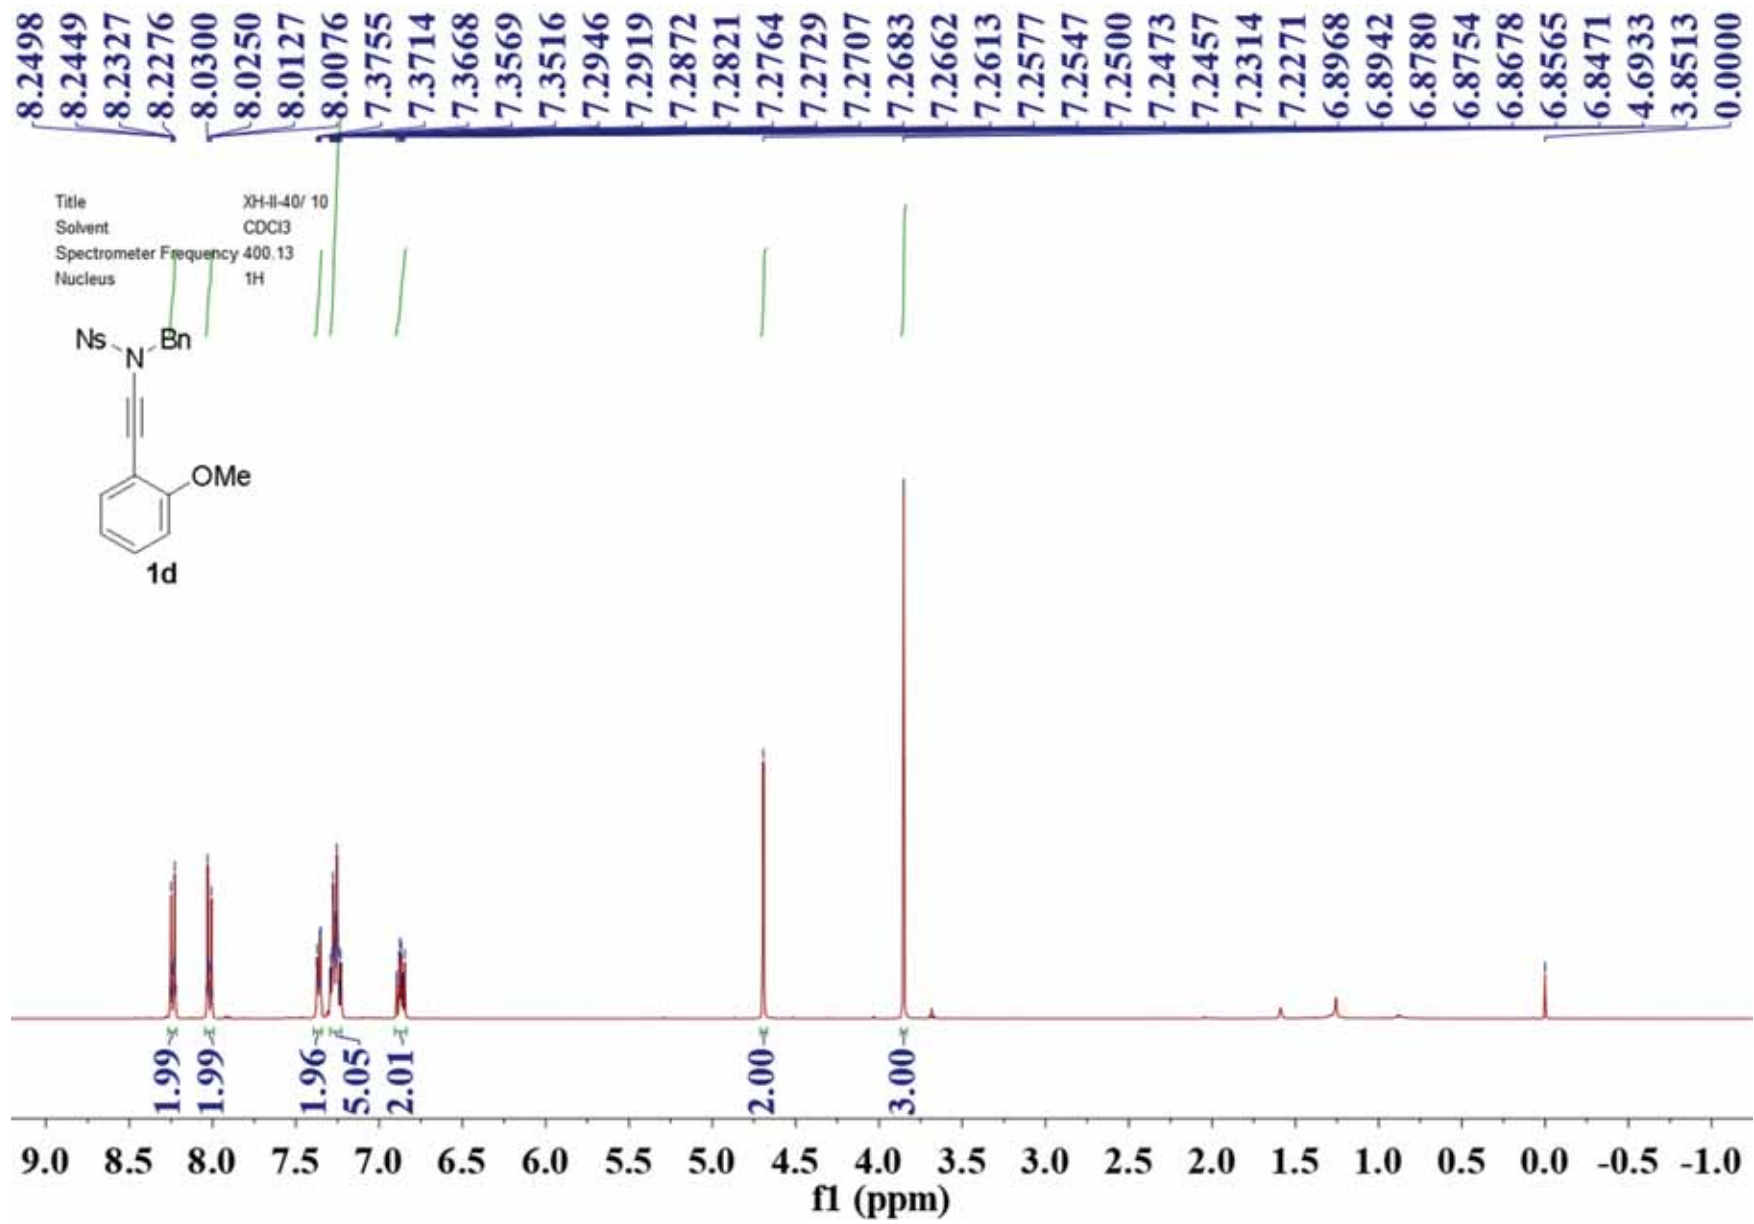

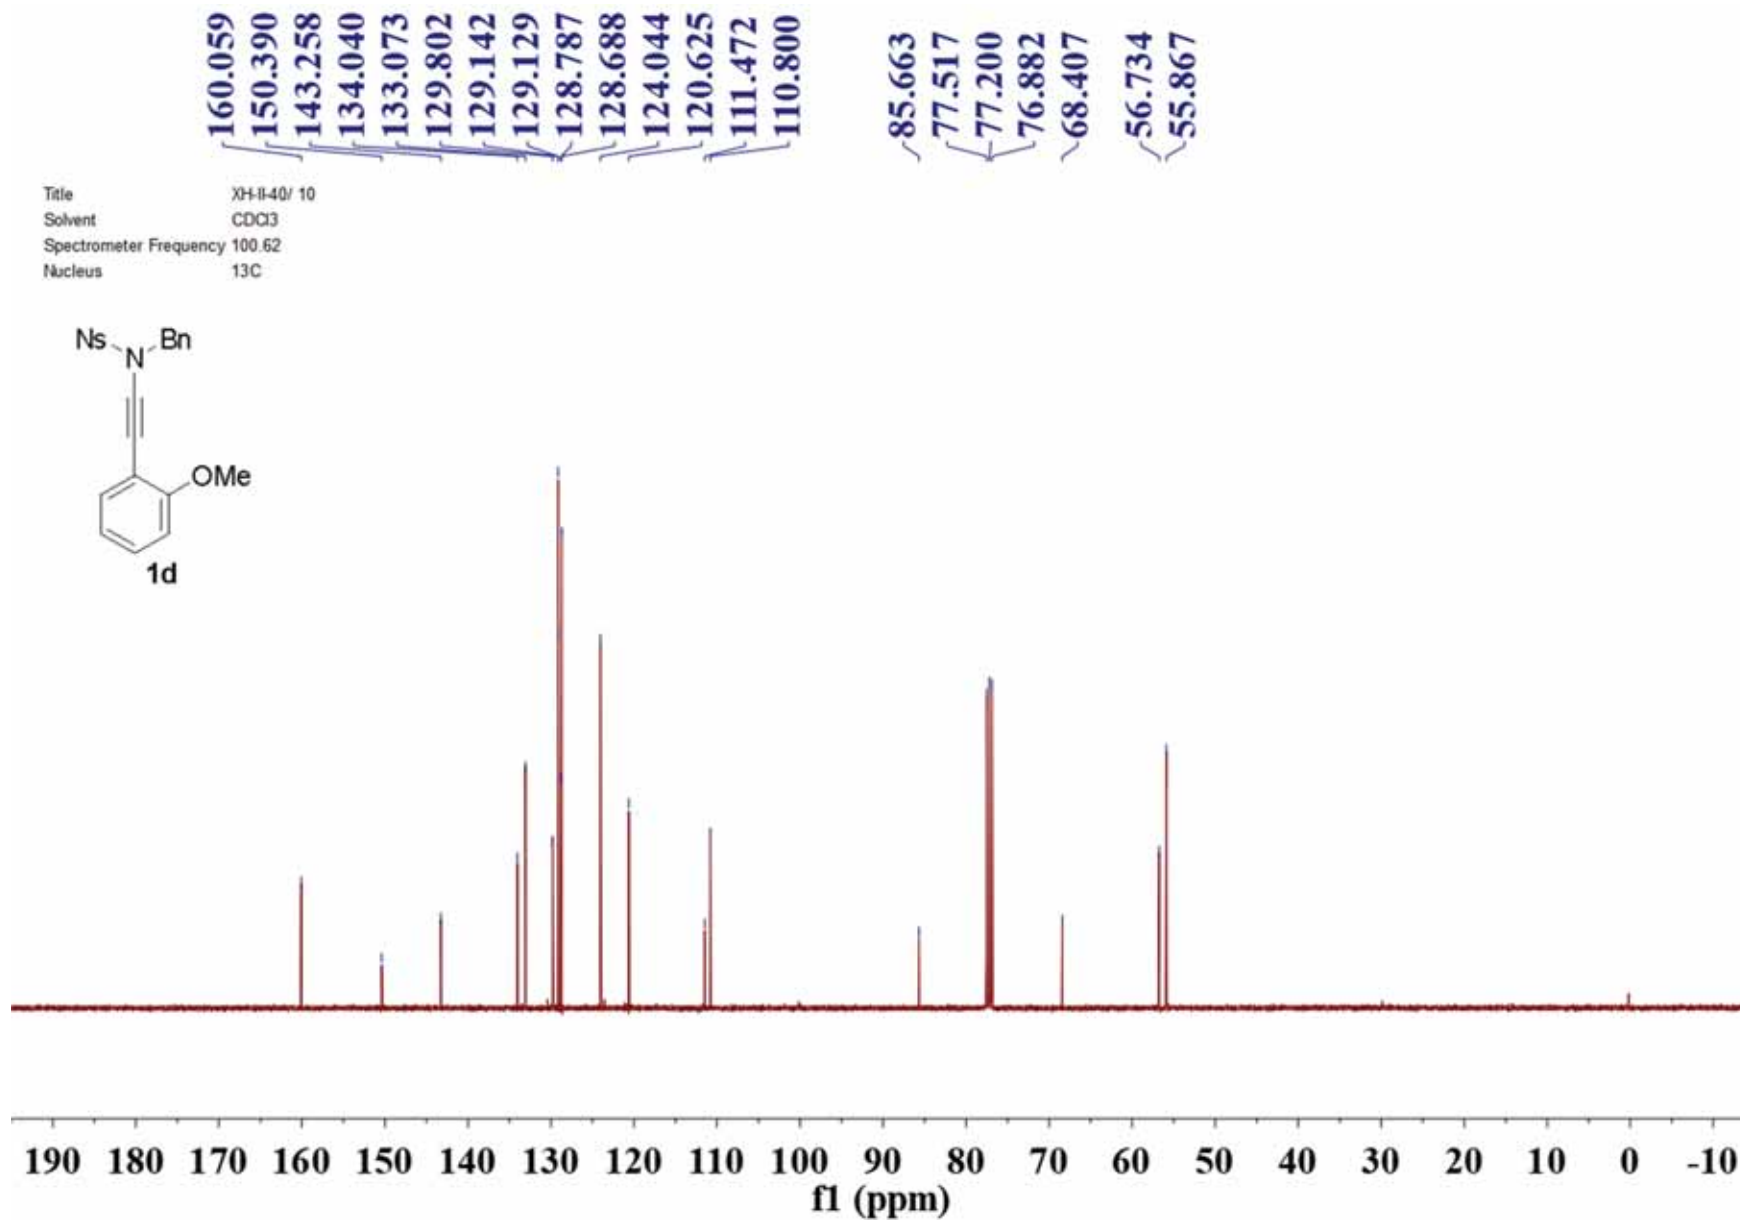



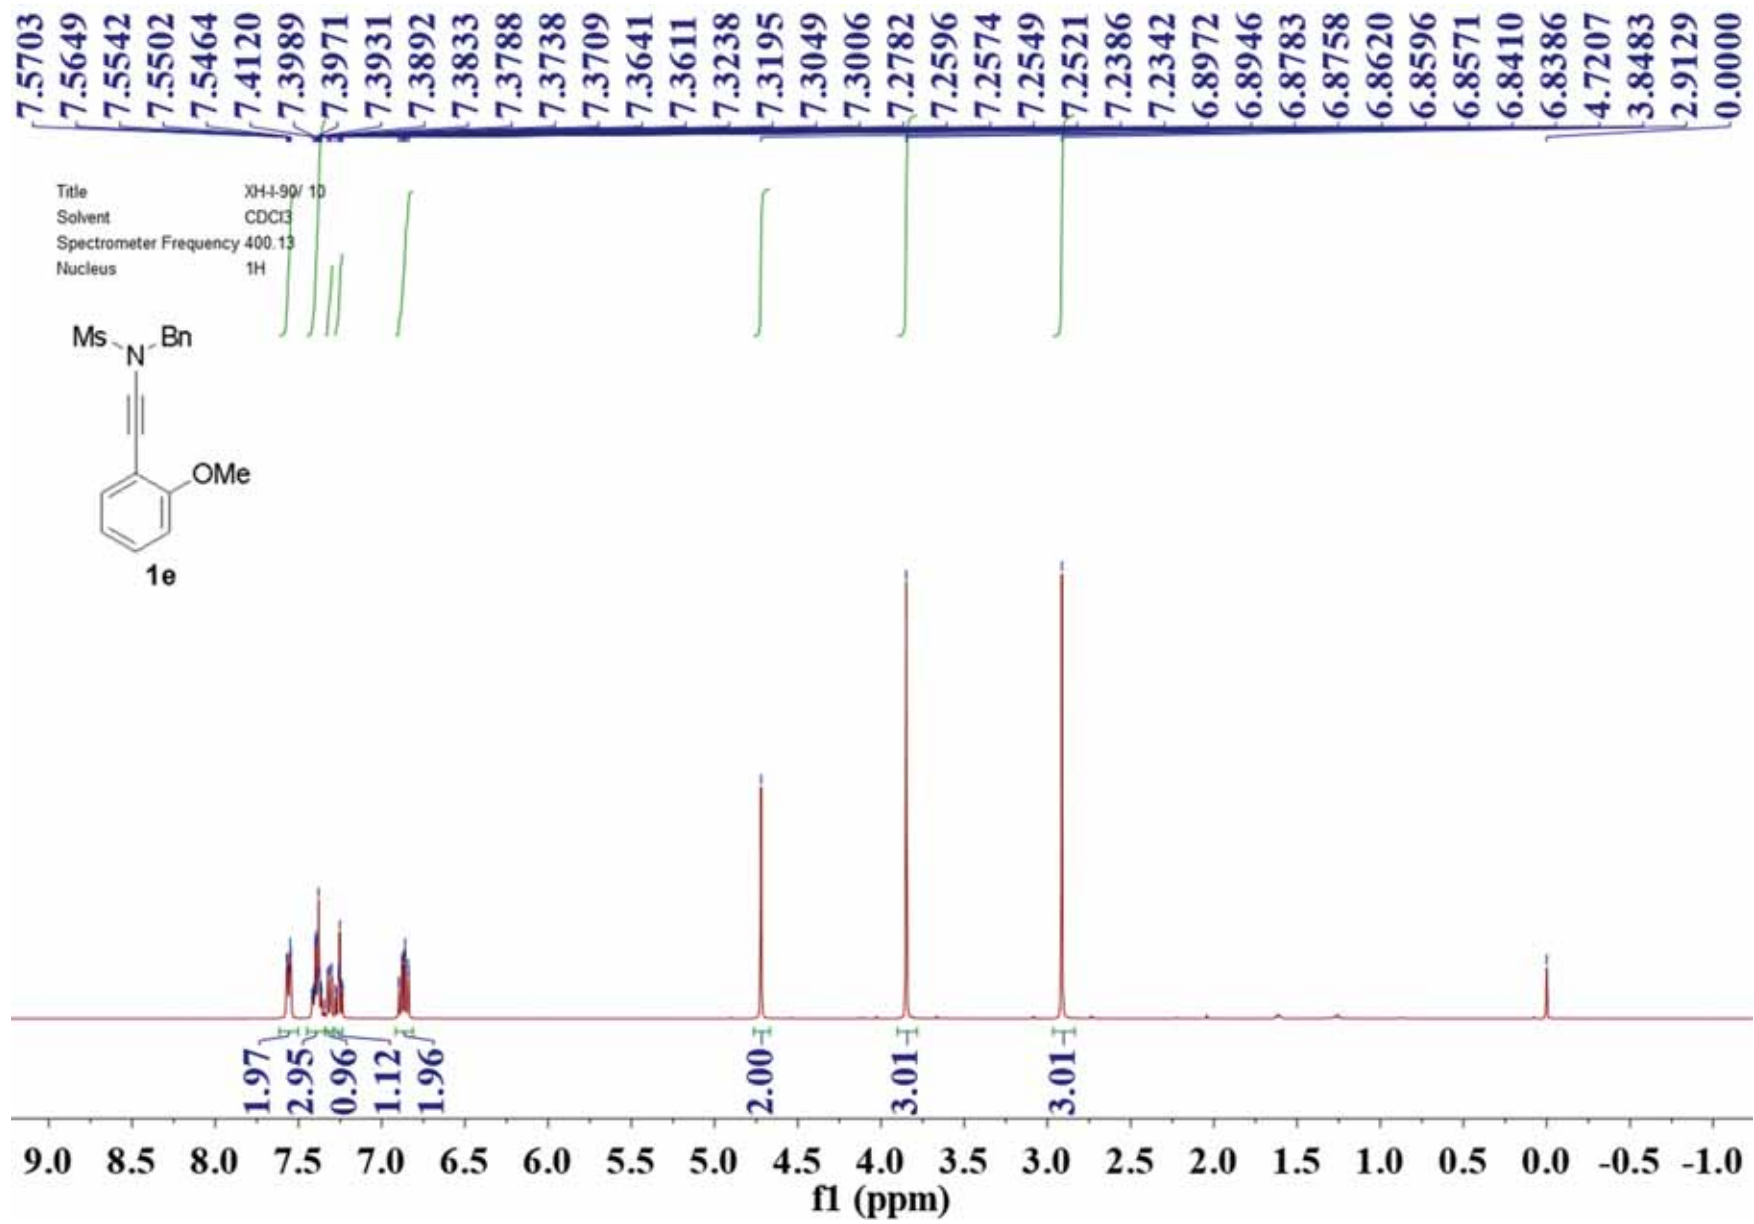

Title XH4-90/ 10  
Solvent CDCl3  
Spectrometer Frequency 100.62  
Nucleus 13C

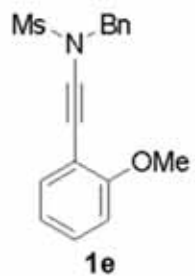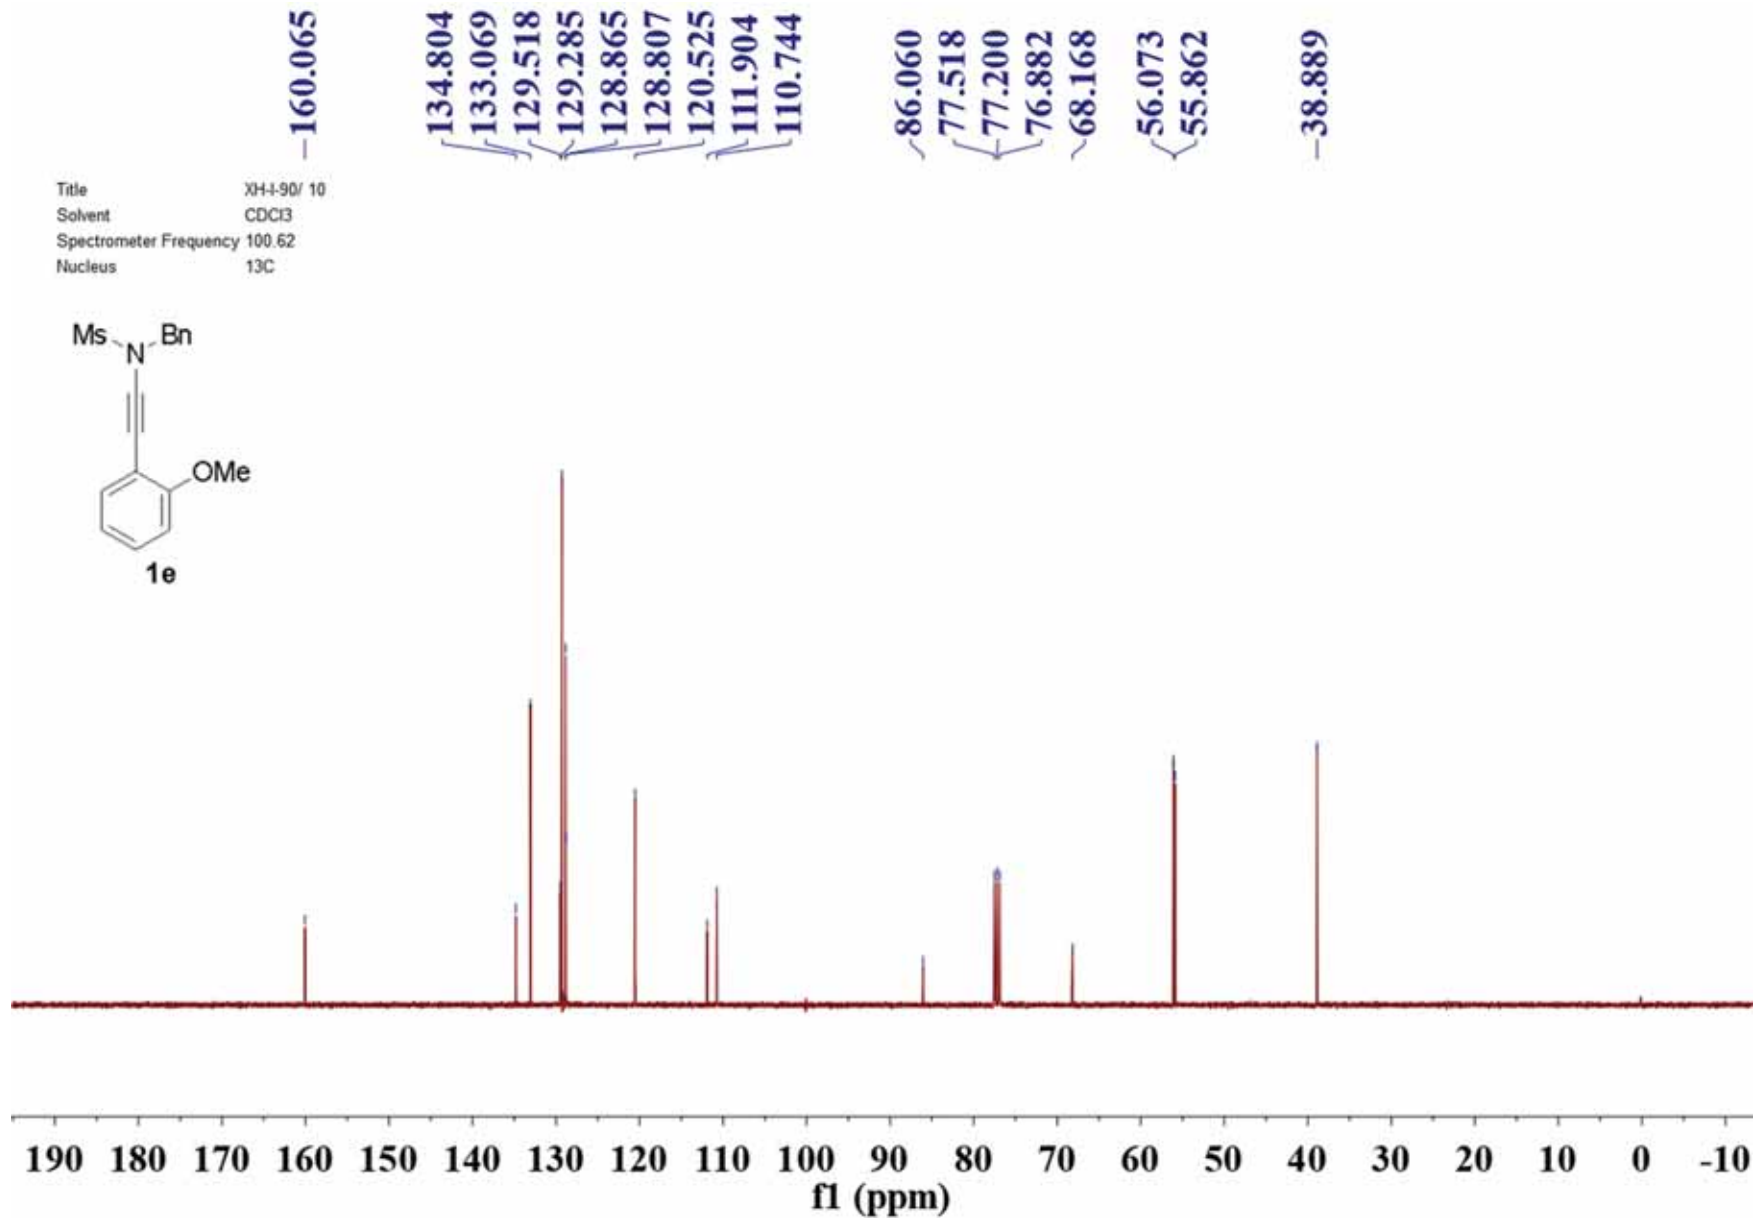

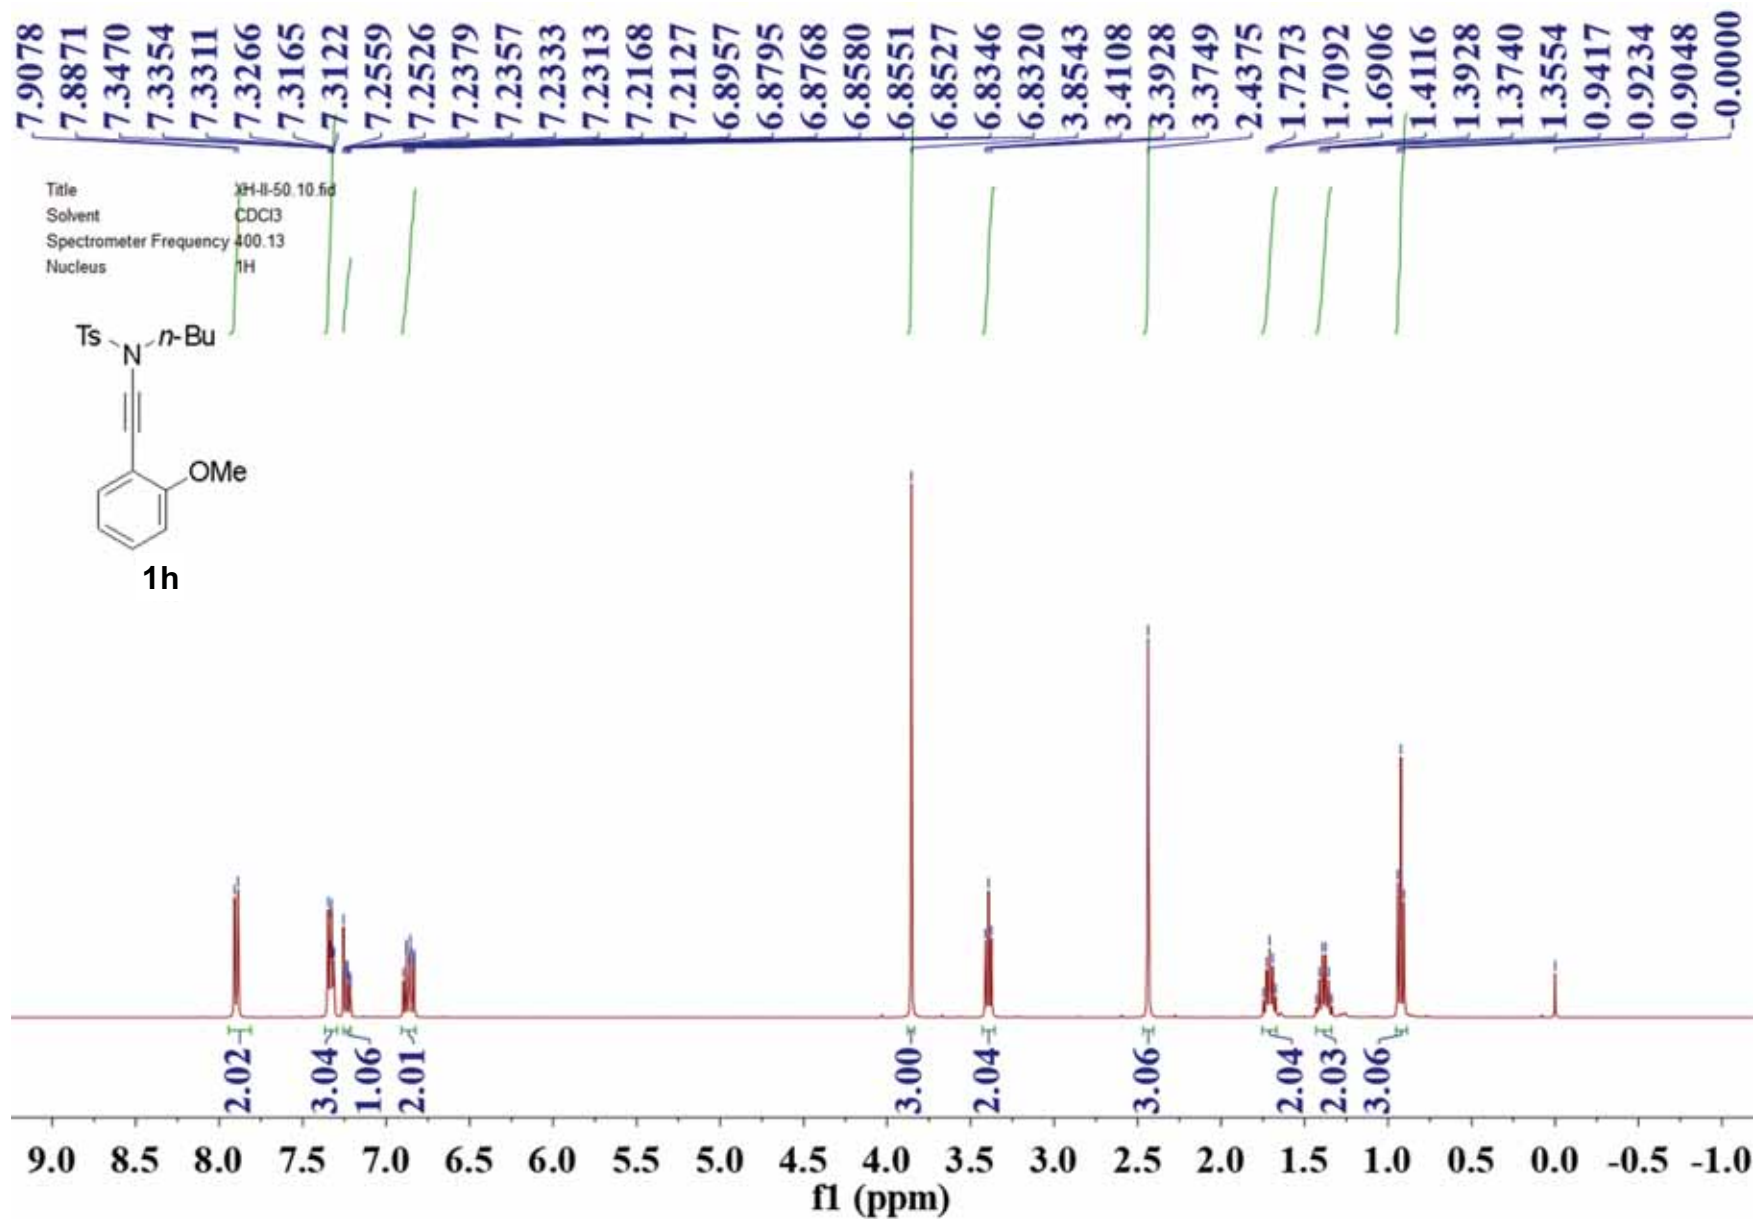

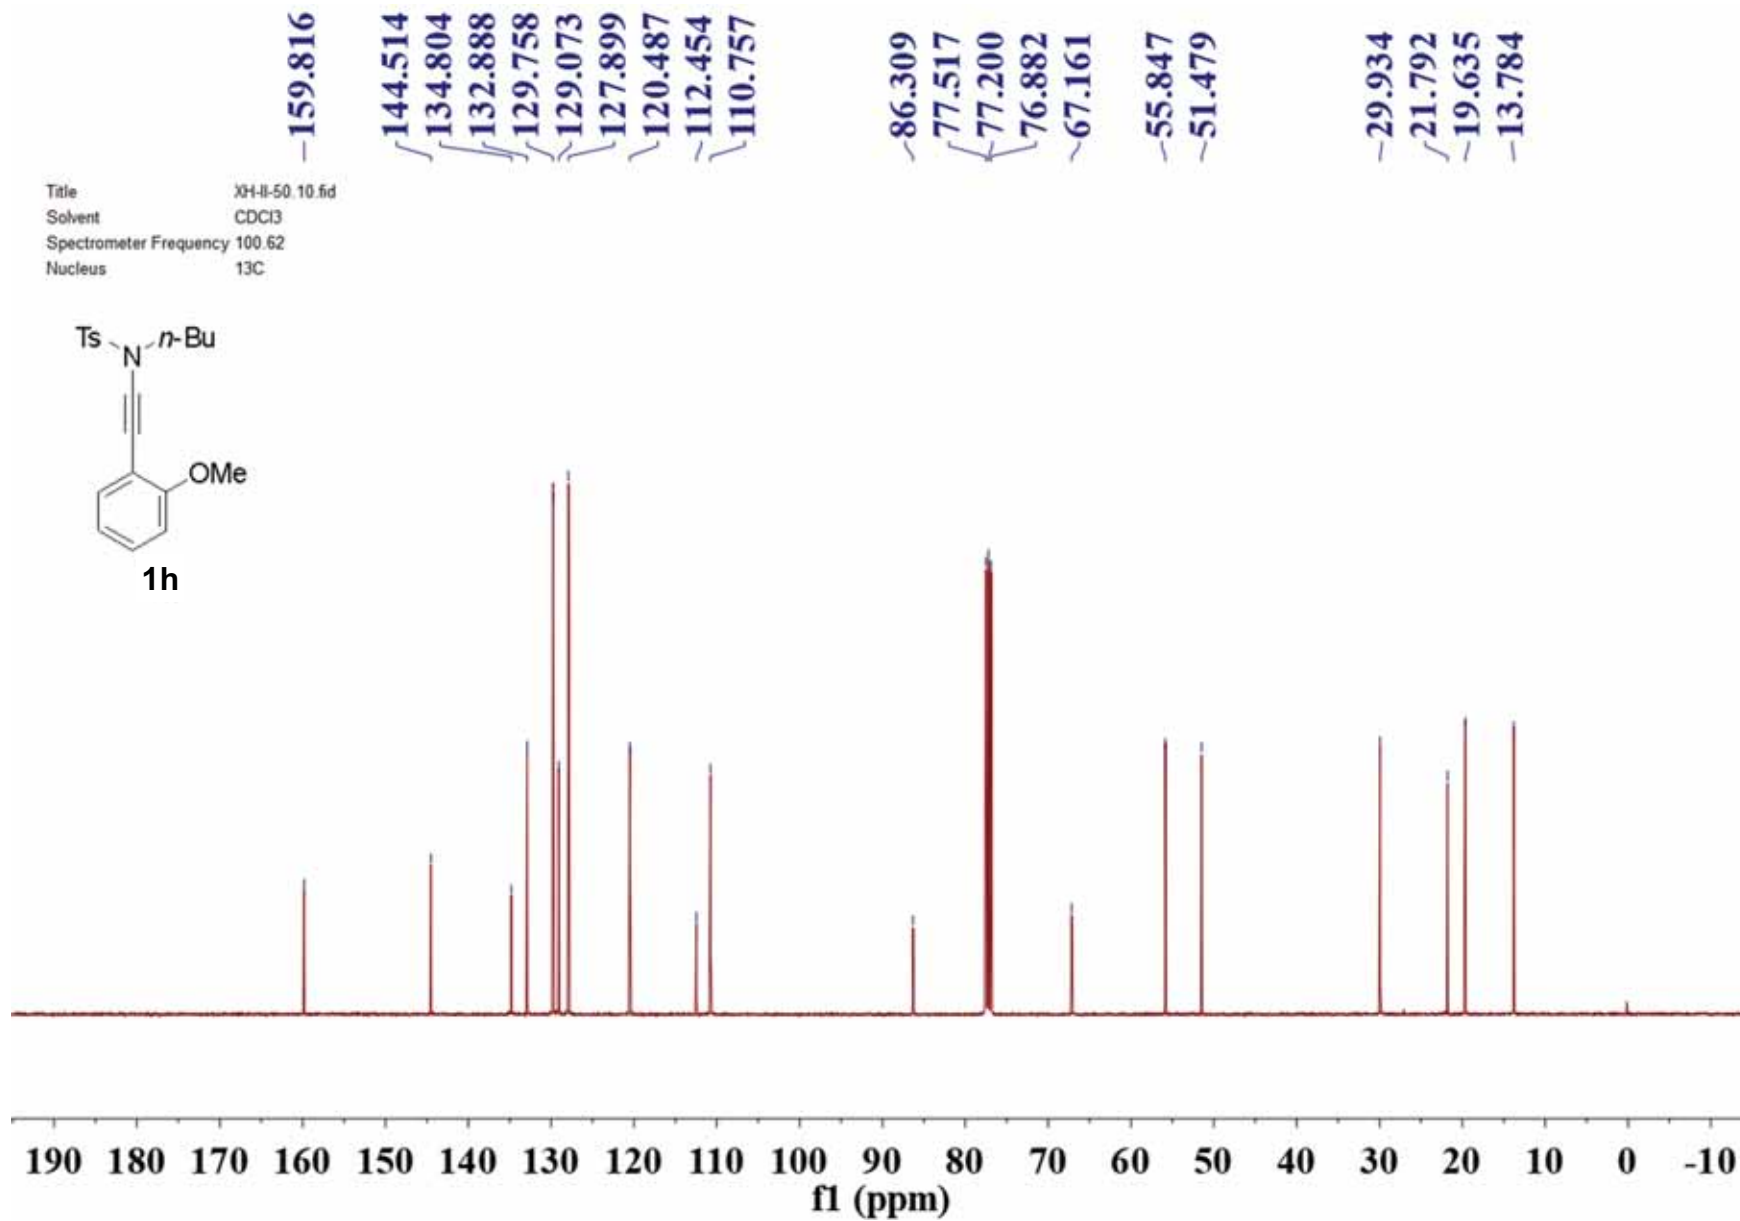

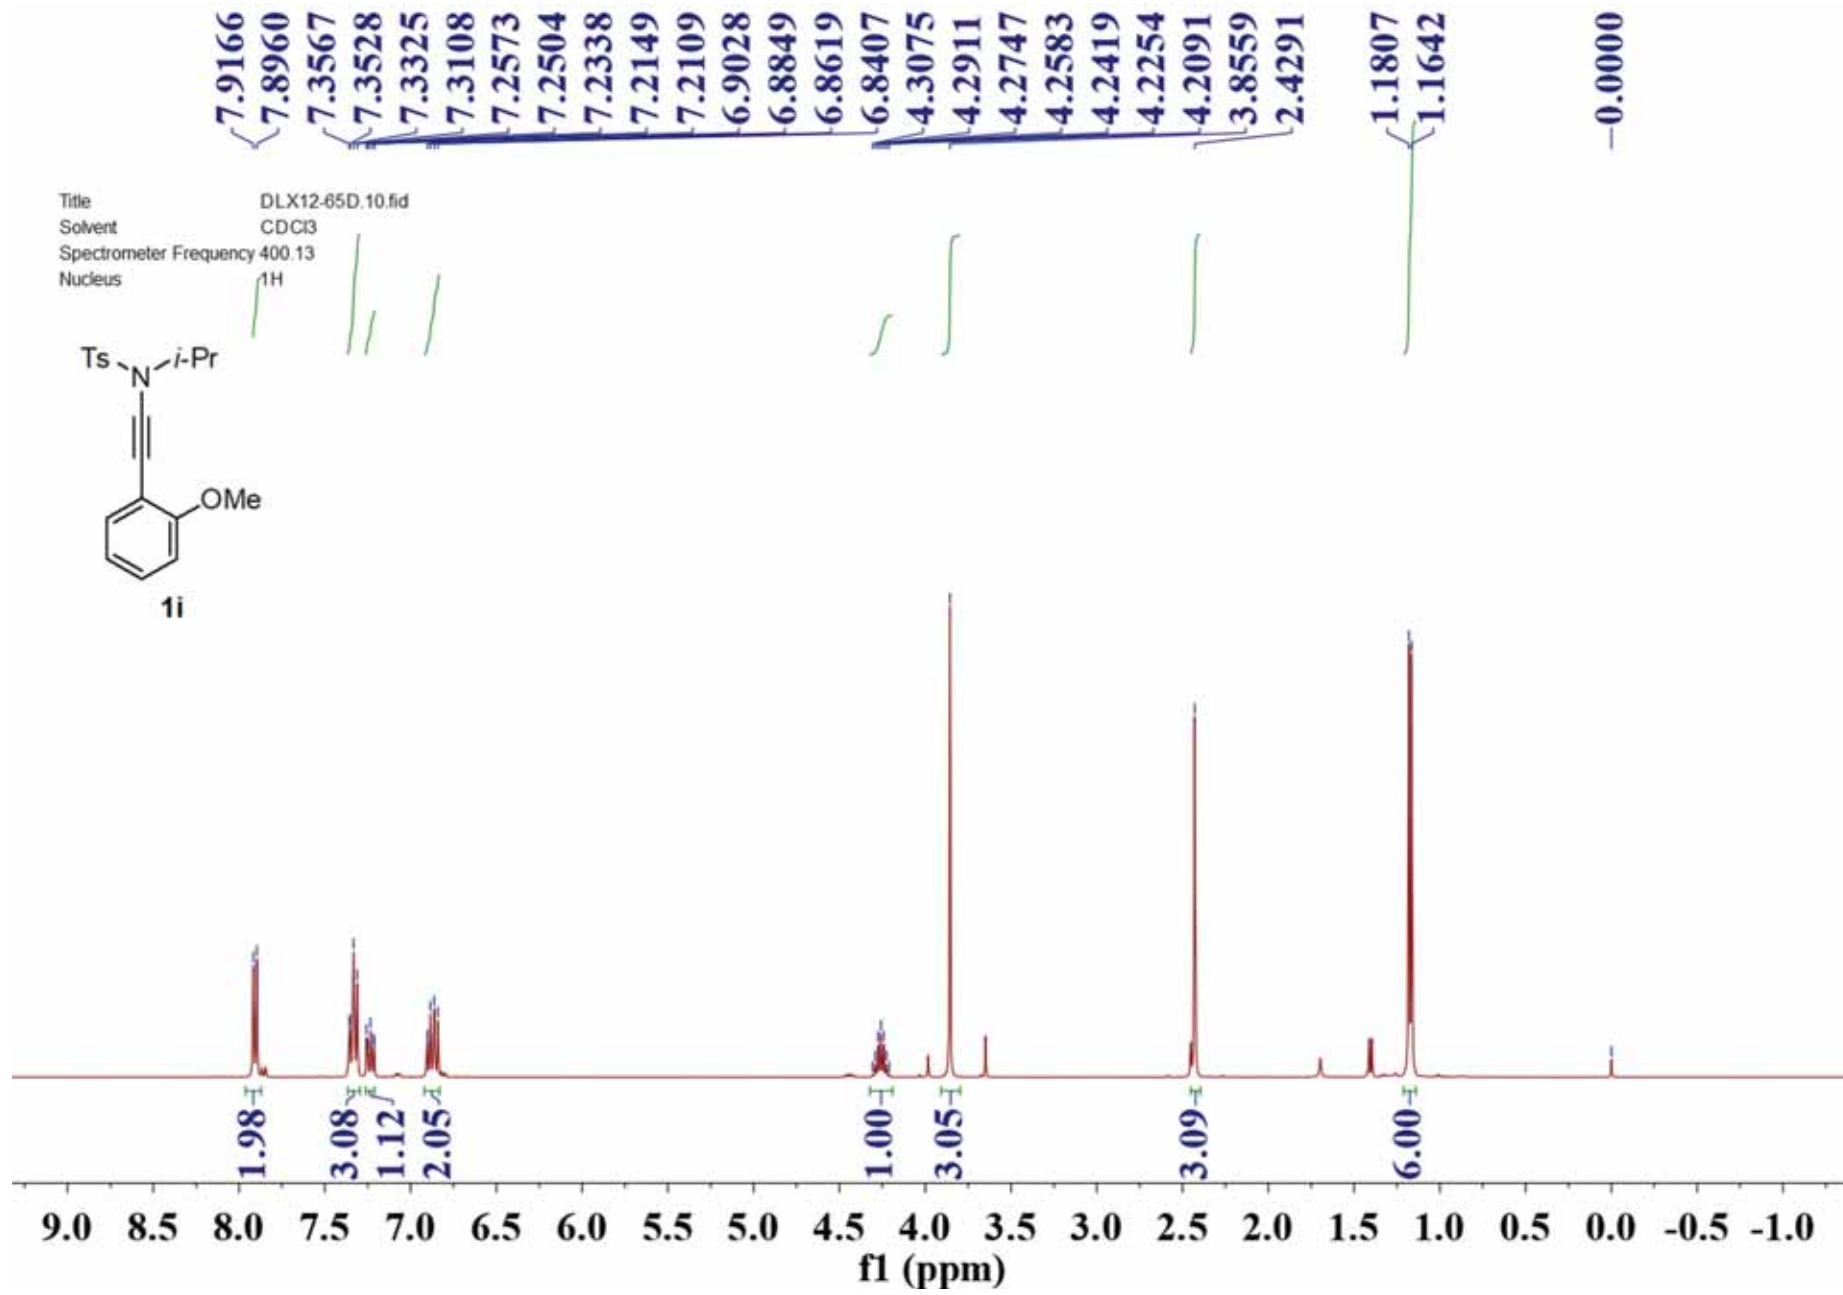

Title DLX12-650.11.fid  
Solvent CDCl3  
Spectrometer Frequency 100.62  
Nucleus 13C

159.774  
144.376  
136.209  
132.563  
129.777  
128.860  
127.654  
120.464  
112.766  
110.772

83.417  
77.518  
77.200  
76.882  
69.154  
55.874  
52.929

21.780  
20.836

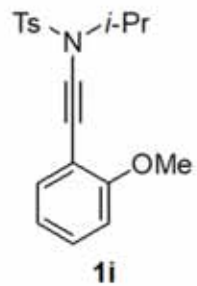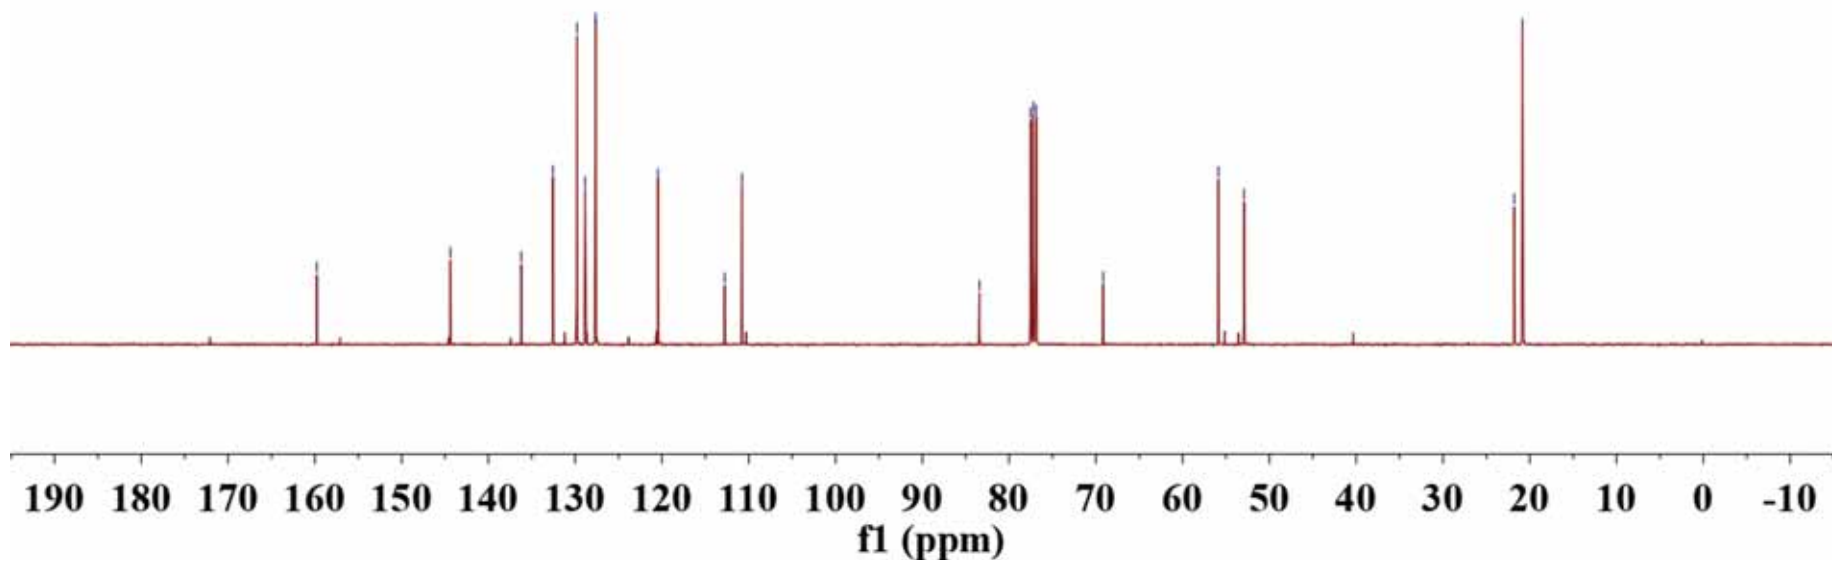

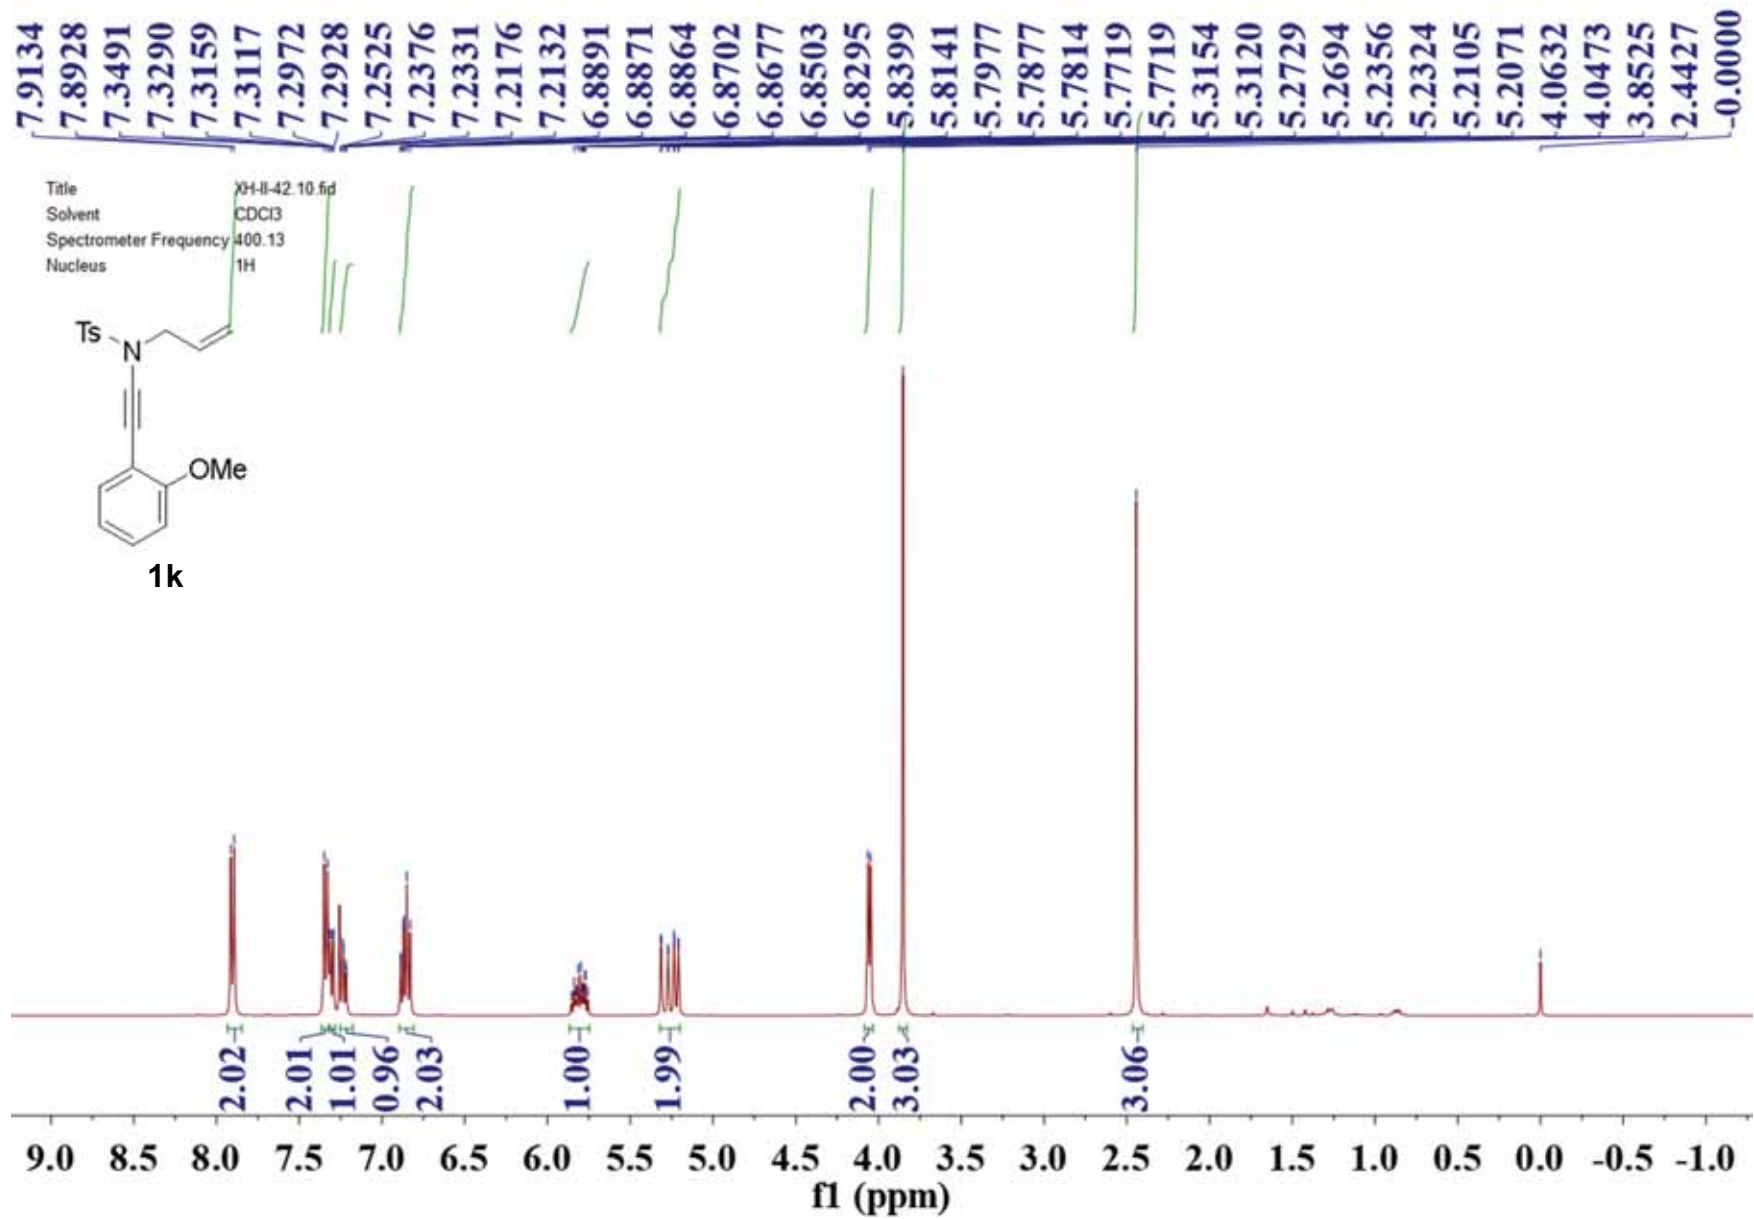

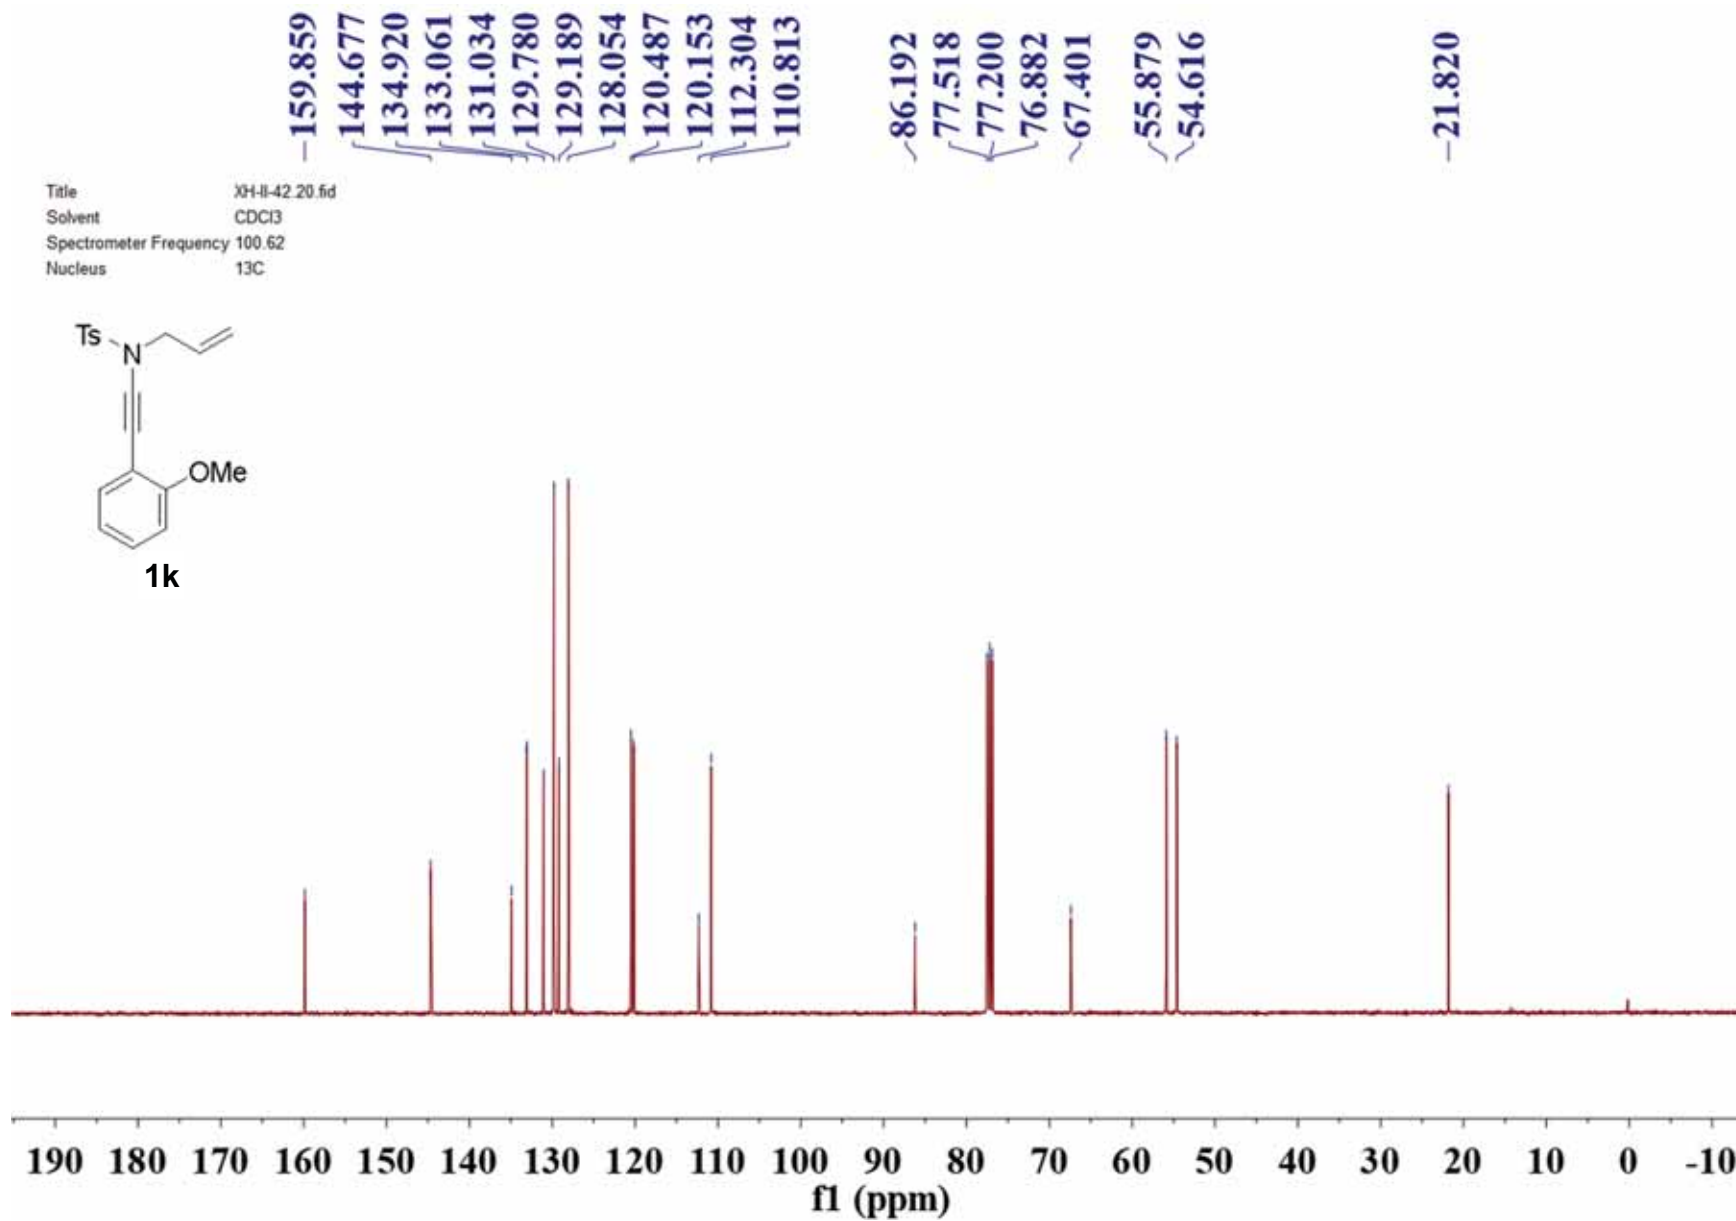



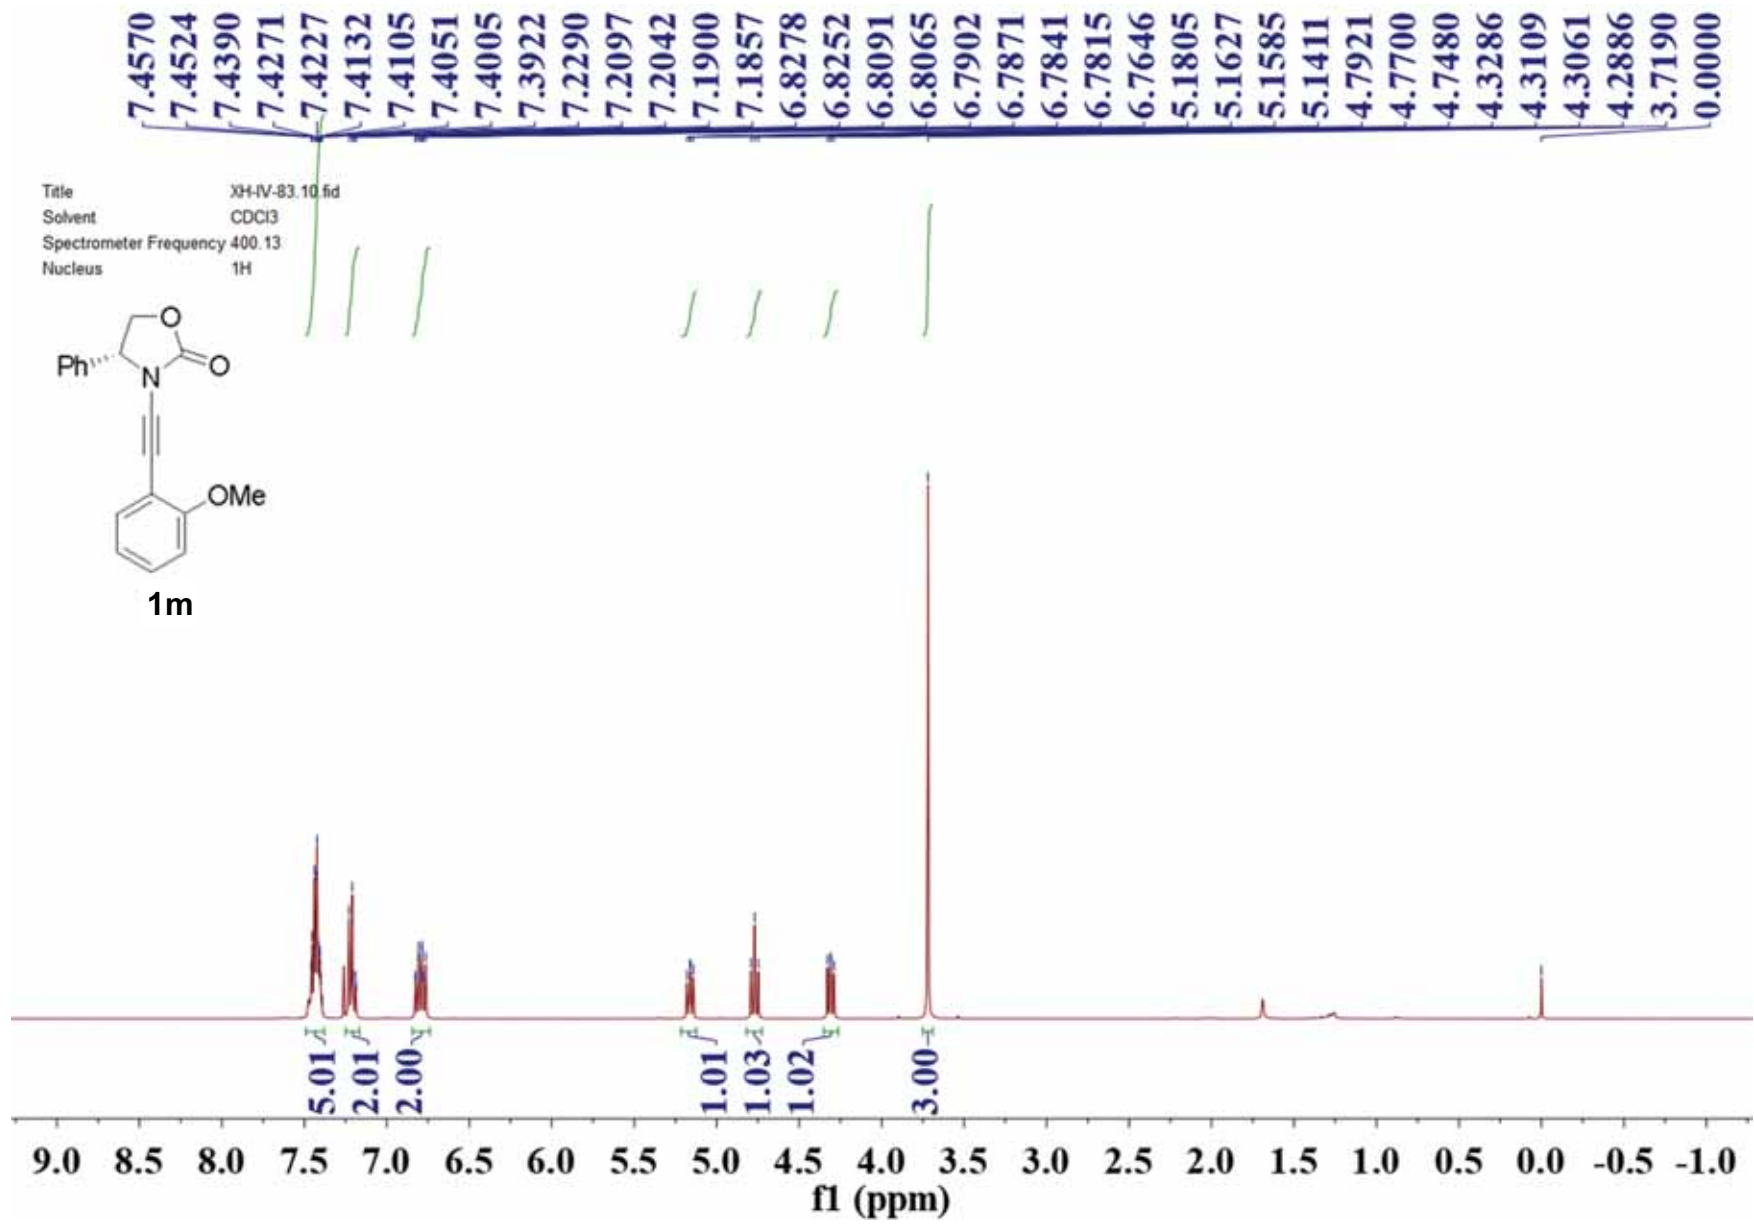

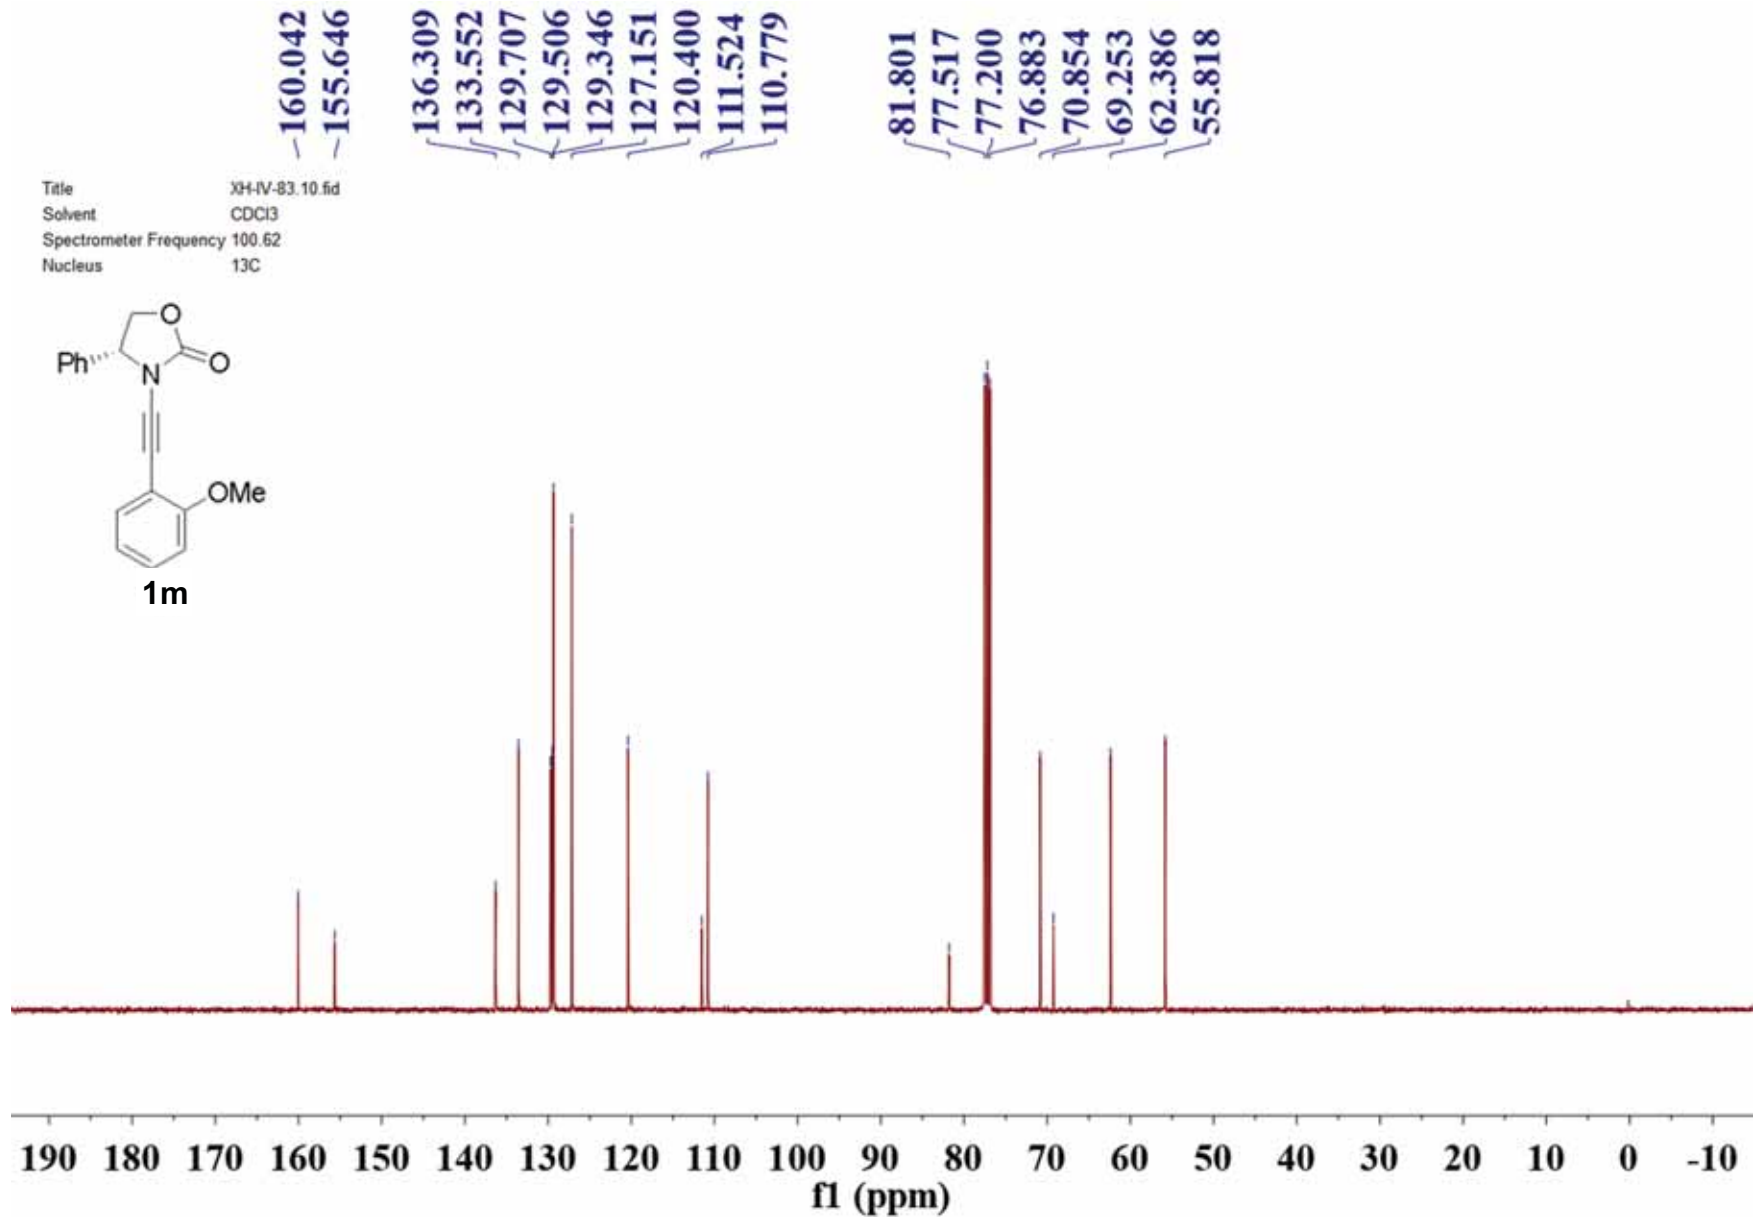

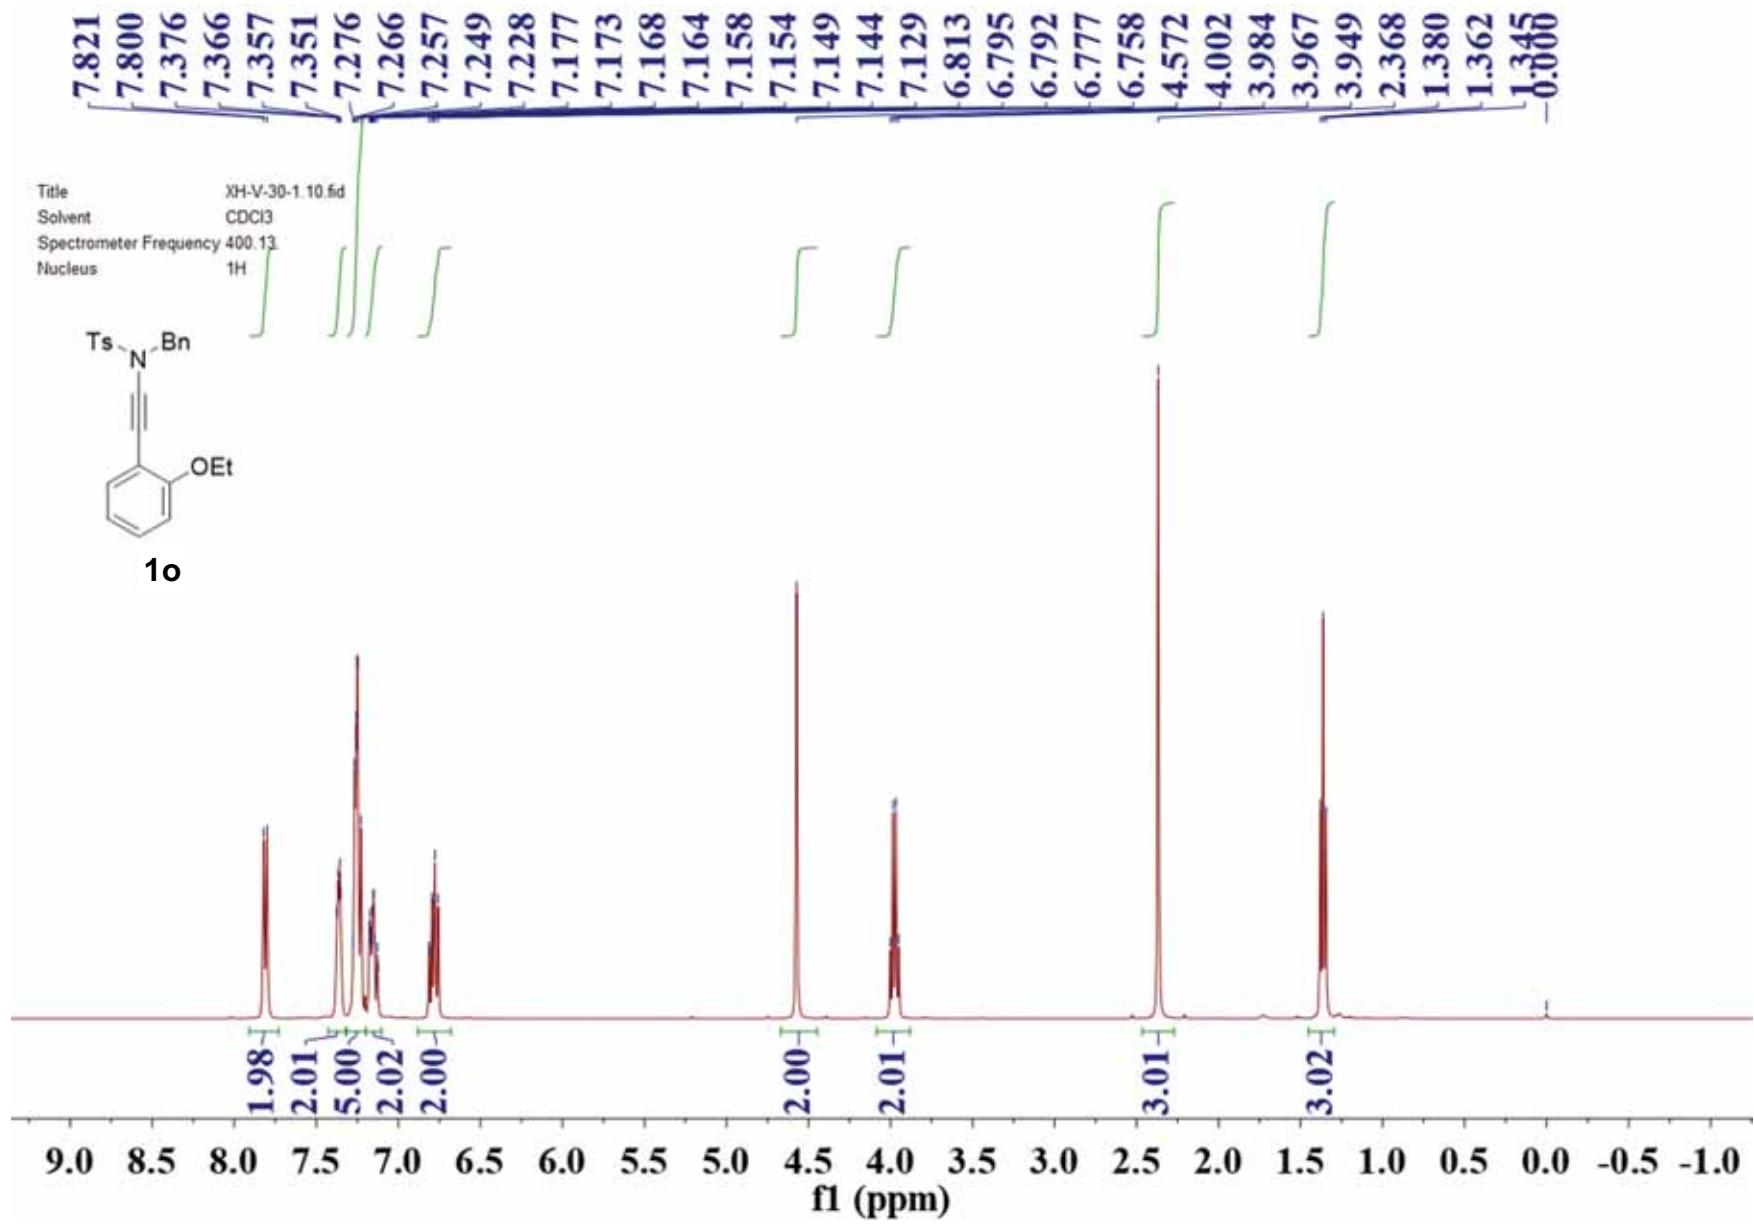

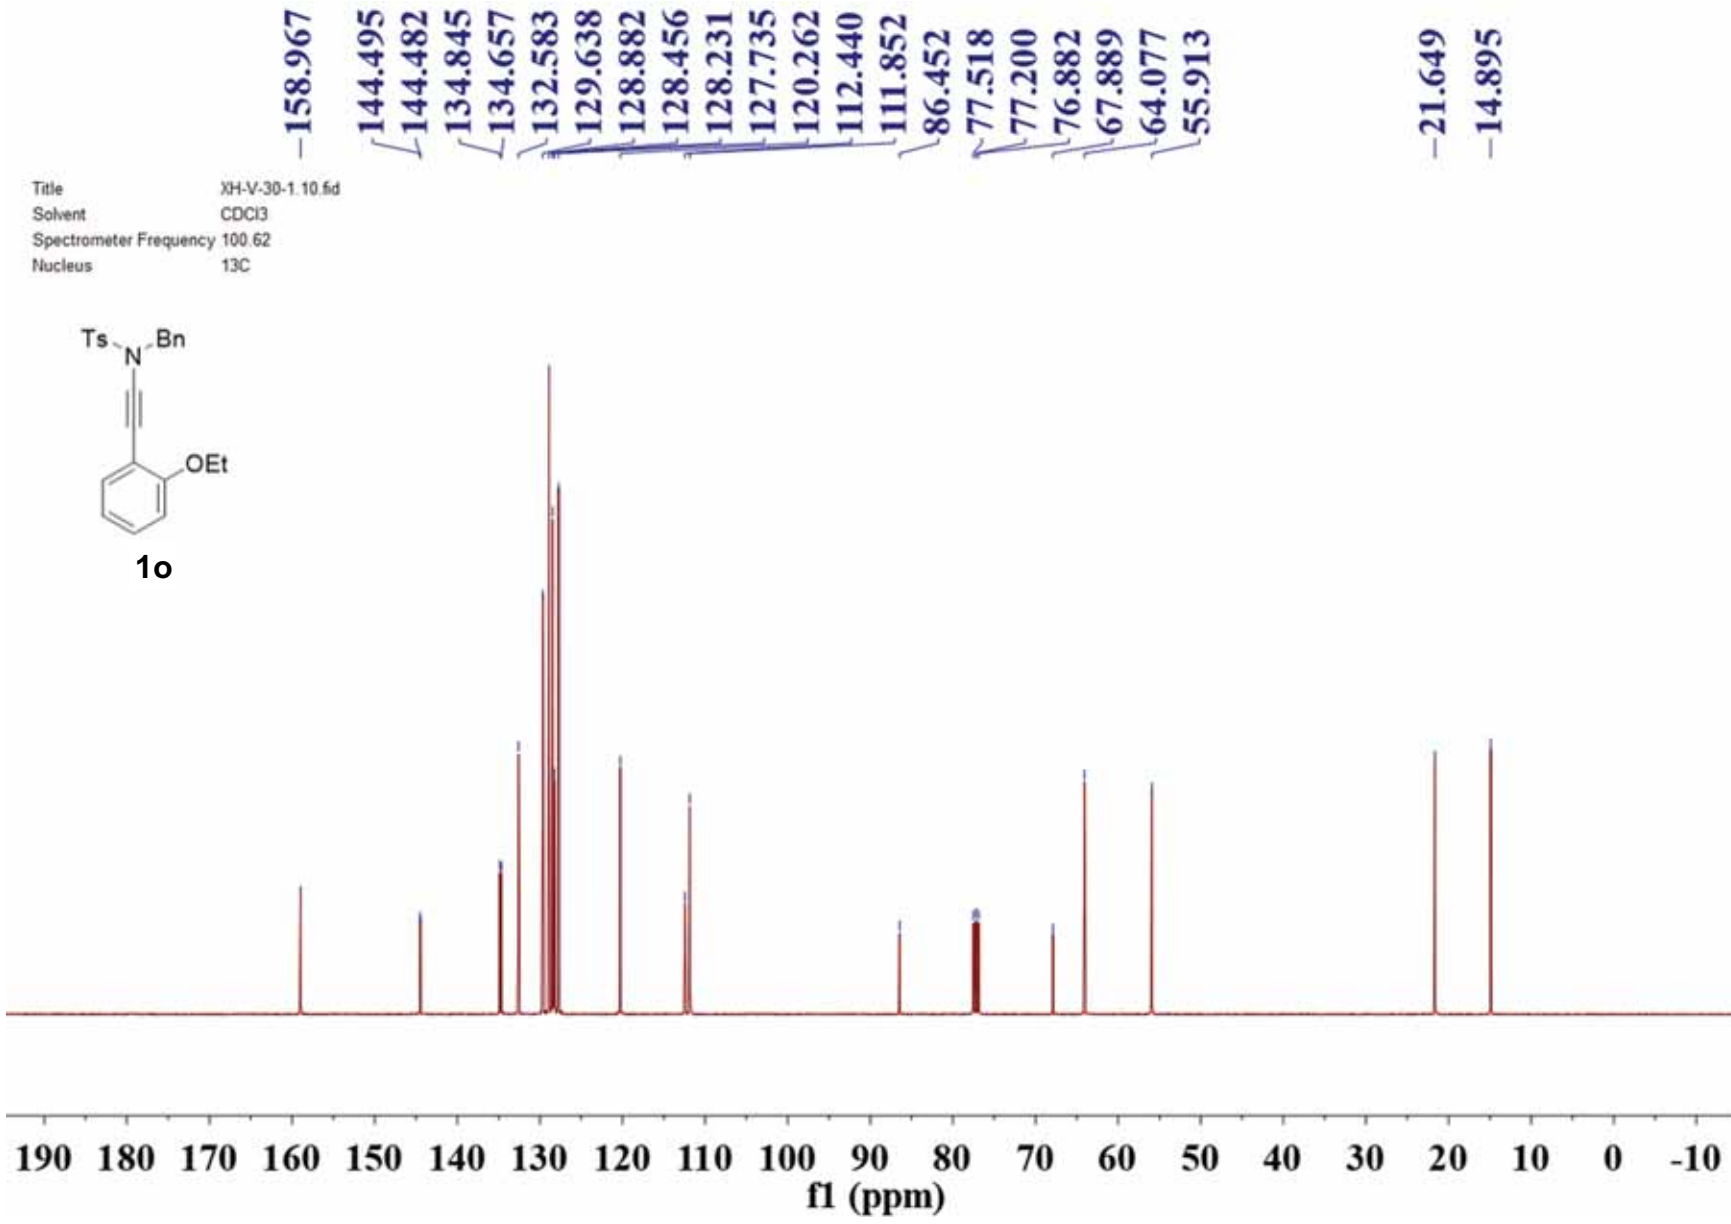

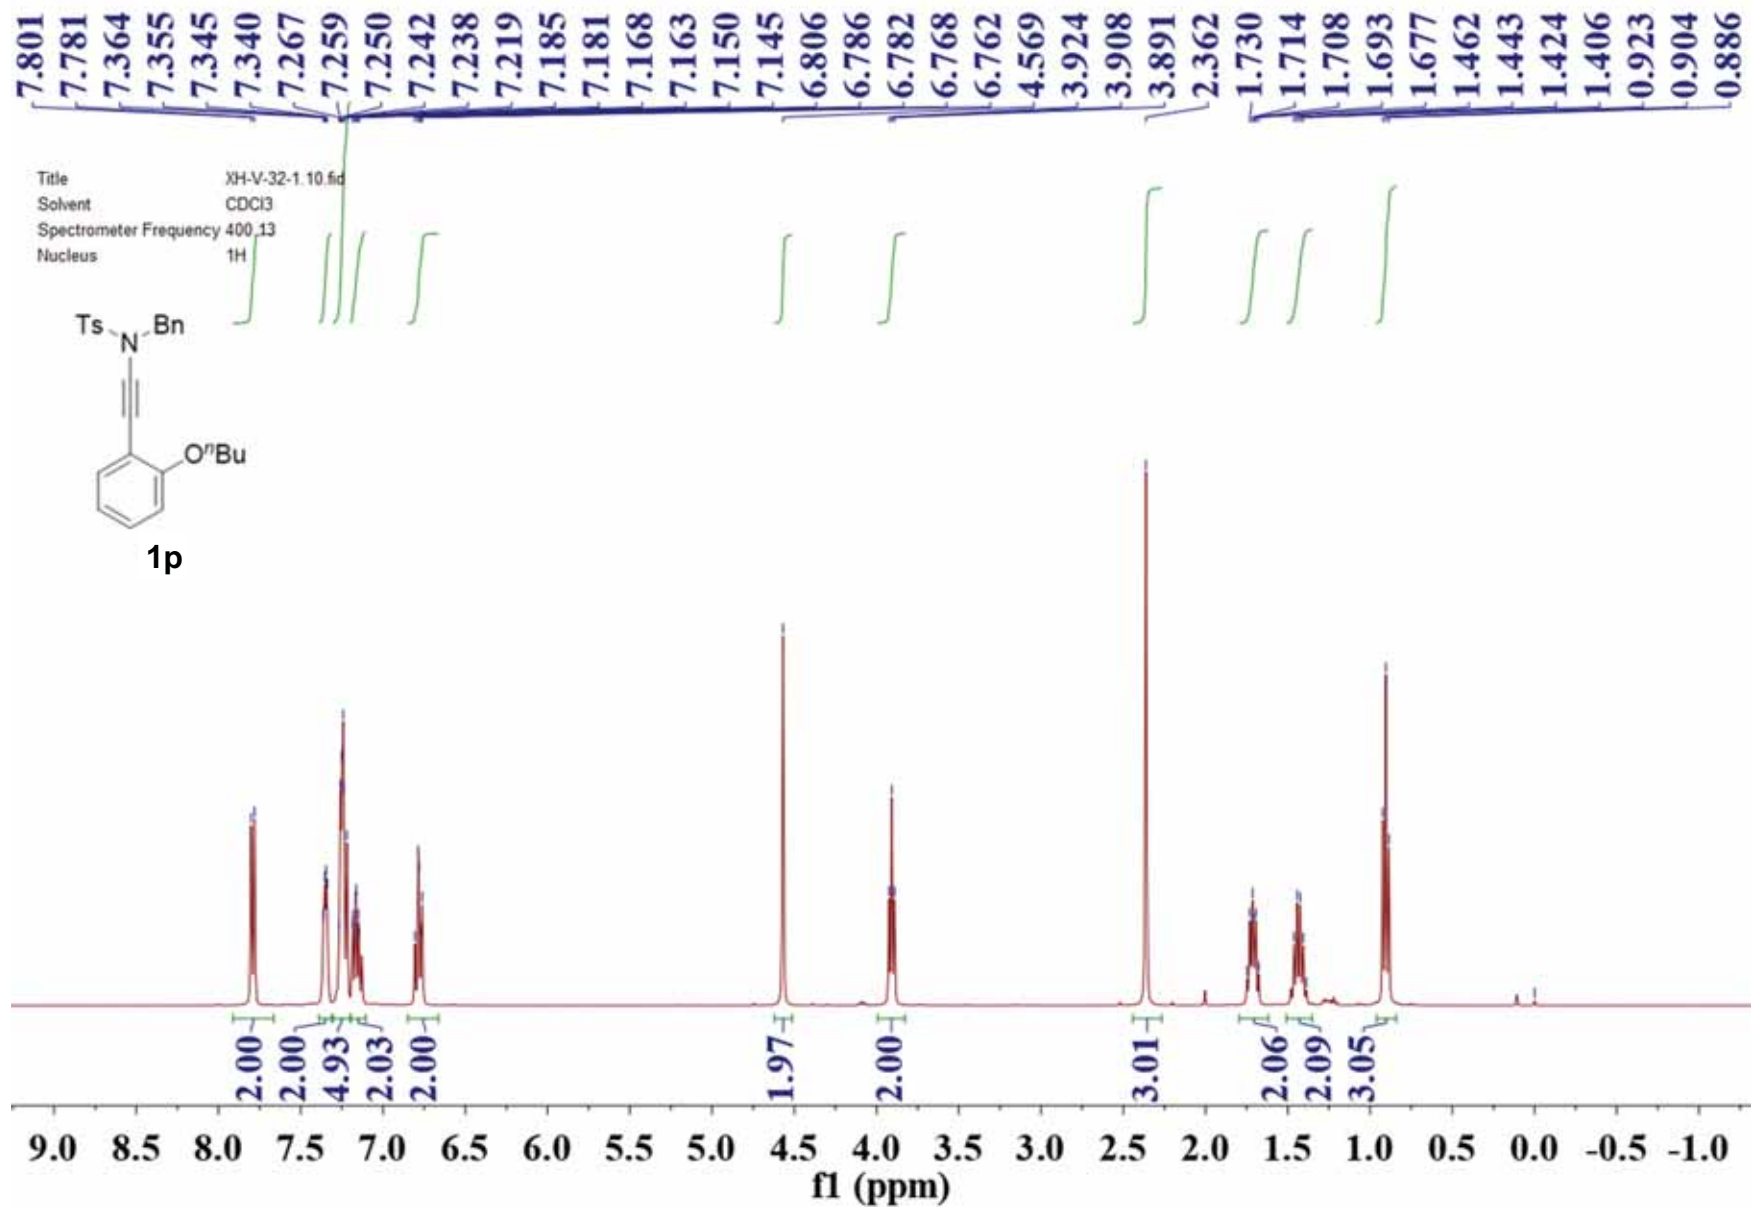

Title XH-V-32-1.10.fid  
Solvent CDCl3  
Spectrometer Frequency 100.62  
Nucleus 13C

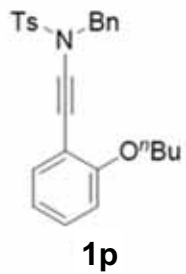

159.145  
144.421  
134.858  
134.678  
132.708  
129.607  
128.918  
128.768  
128.426  
128.178  
127.688  
120.141  
112.369  
111.749  
86.385  
77.519  
77.200  
76.882  
68.155  
67.736  
55.936

31.296  
21.614  
19.185  
13.927

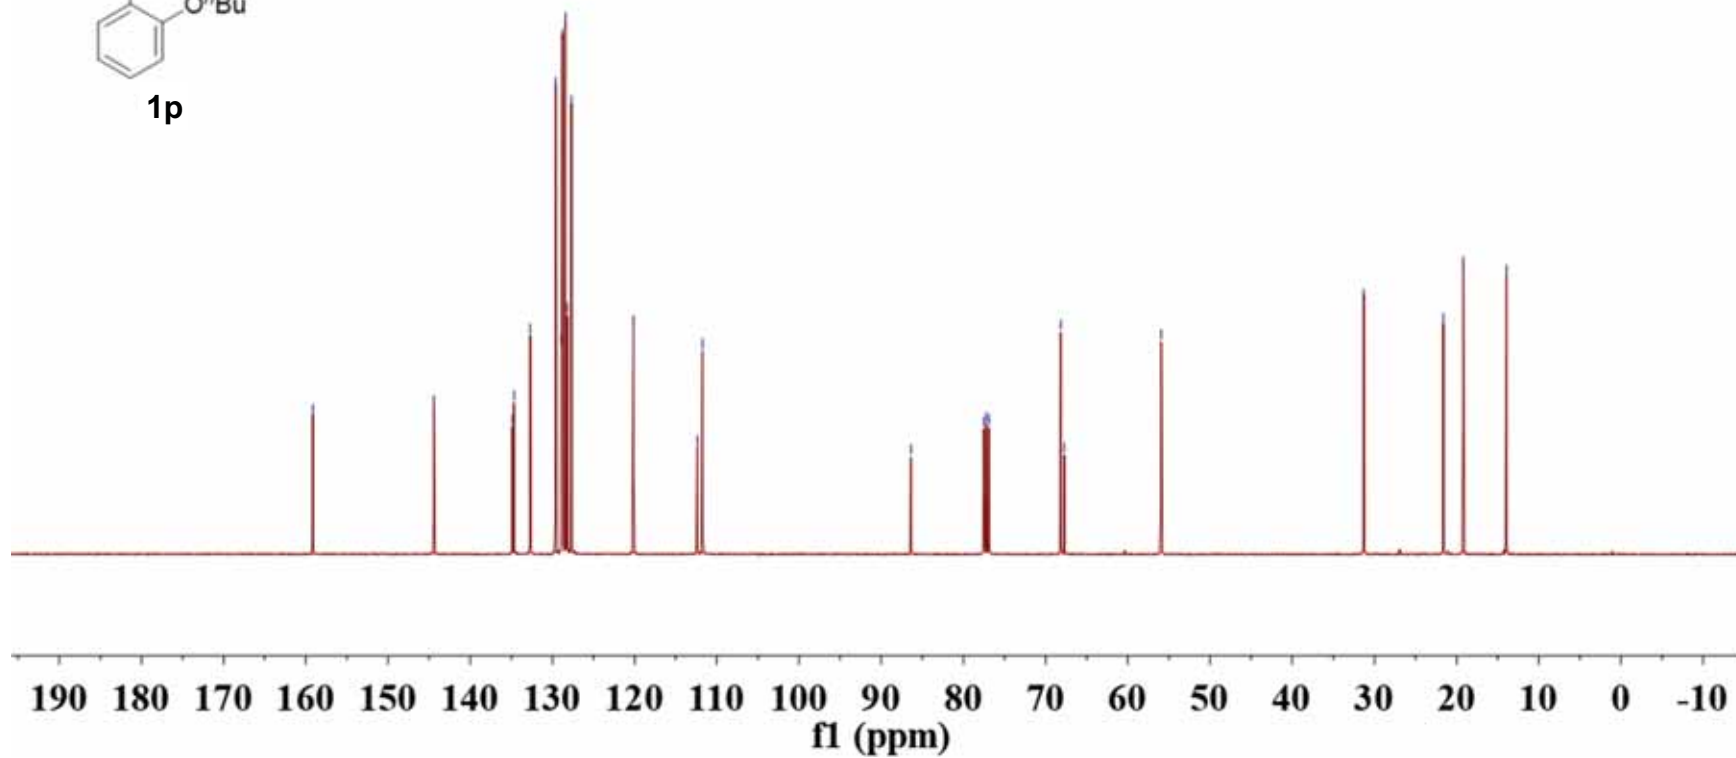

# $^1\text{H}$ NMR and $^{13}\text{C}$ NMR Spectra of 3-Acyl-2-Amidobenzofurans 4.

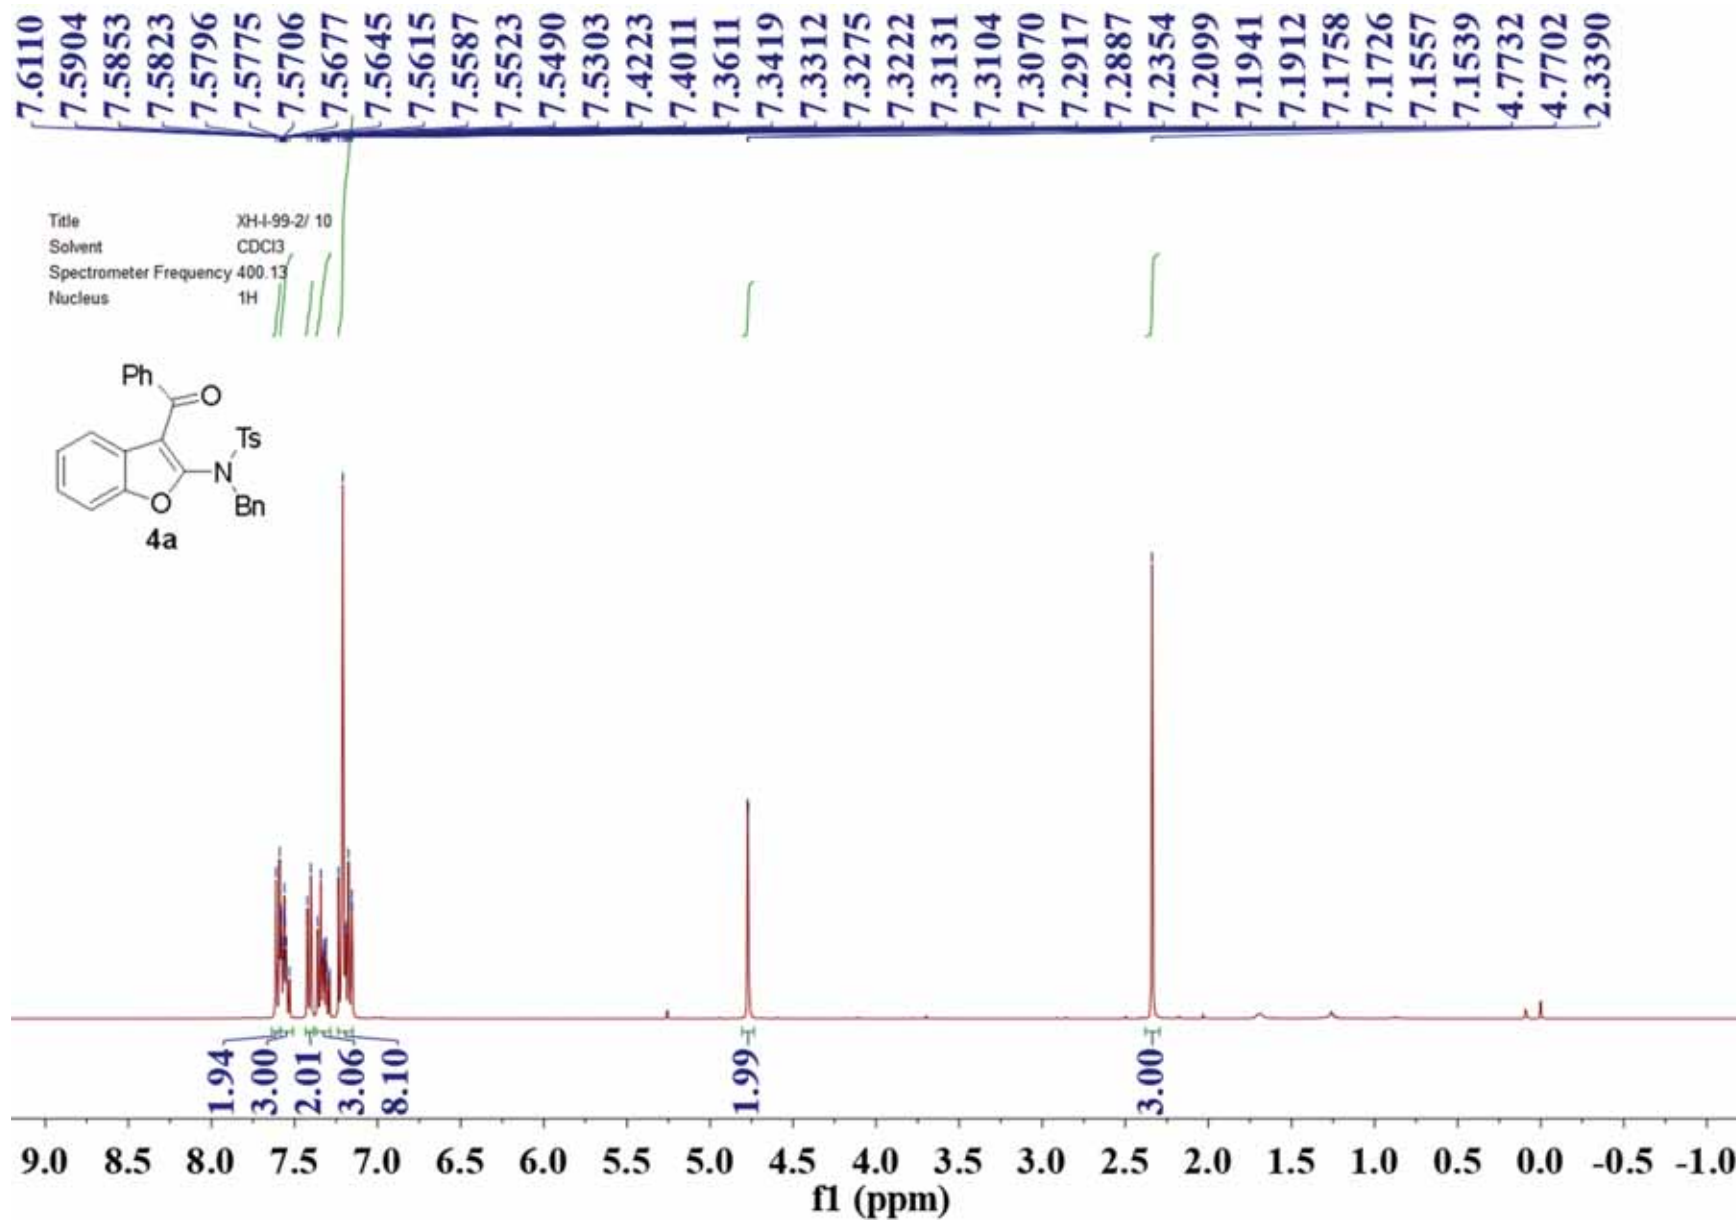

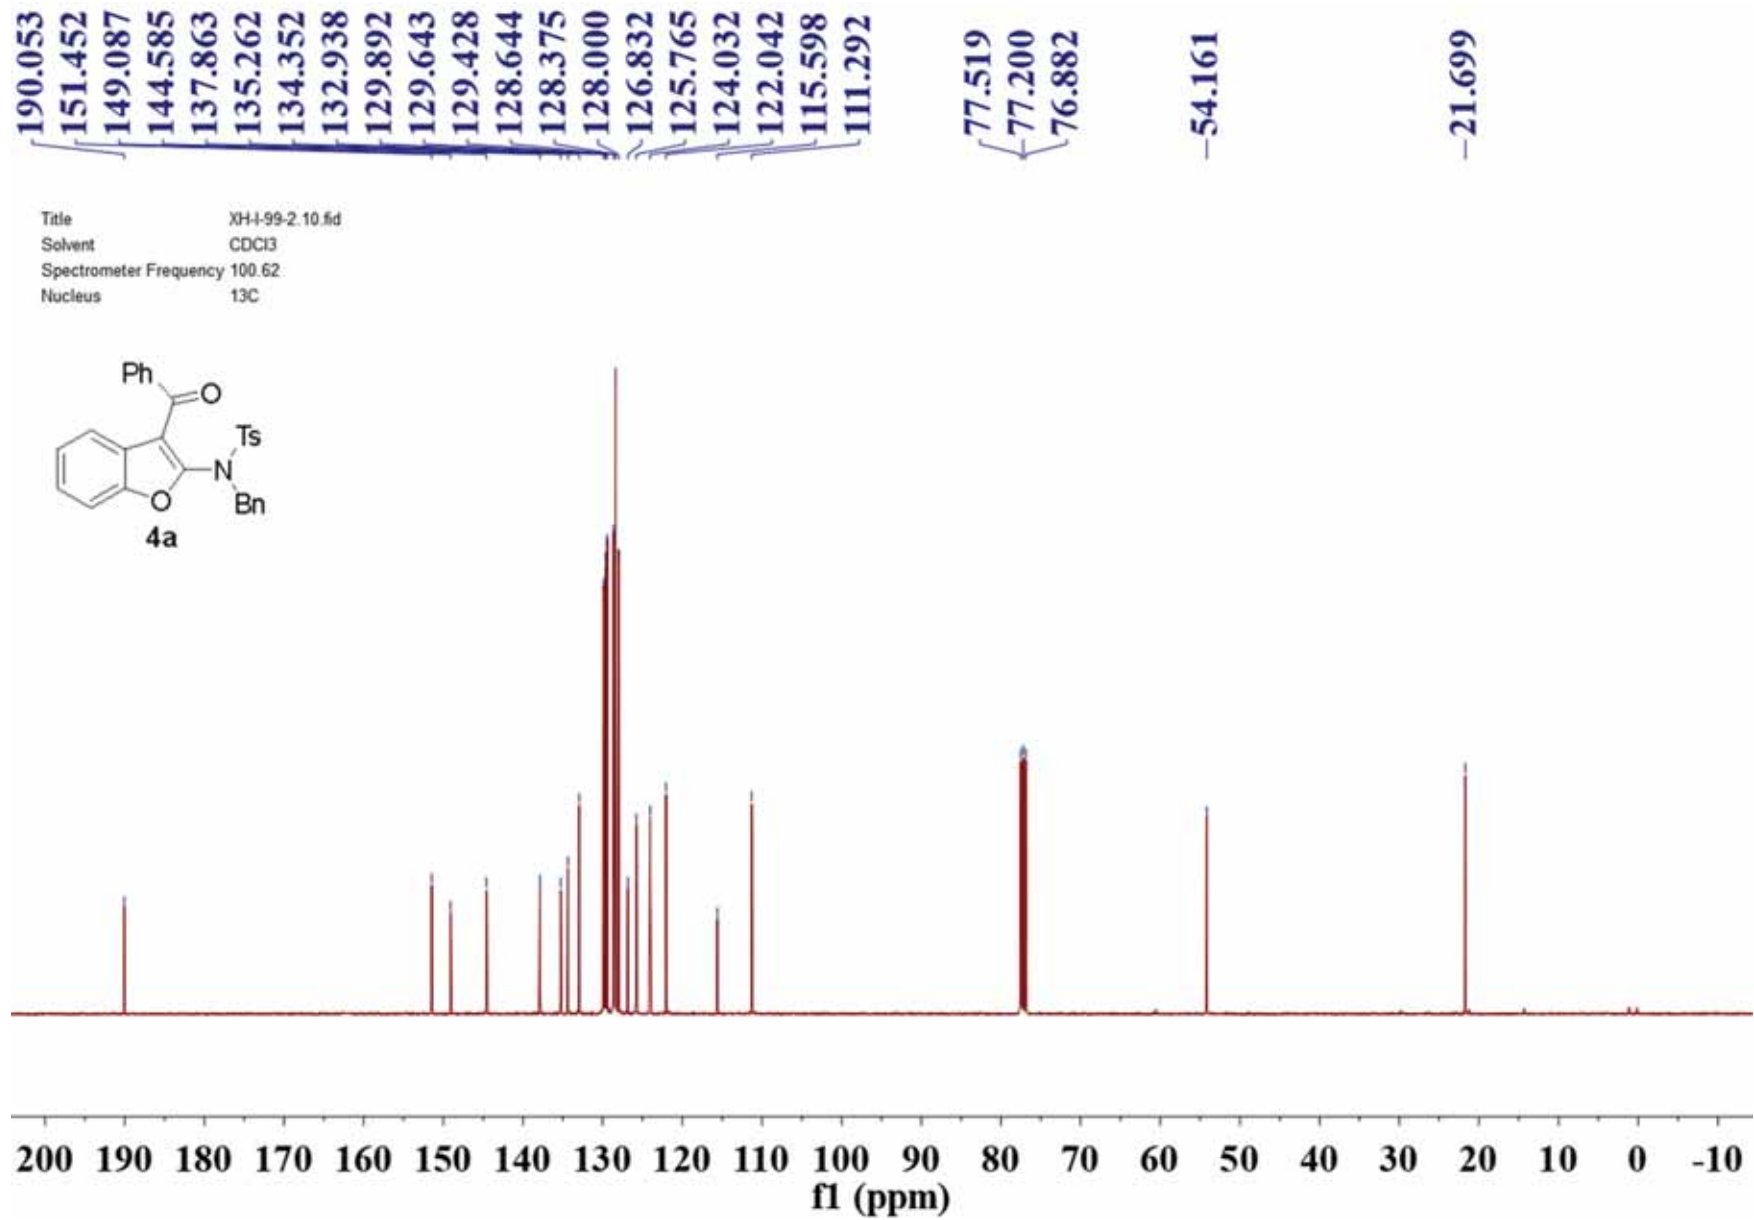



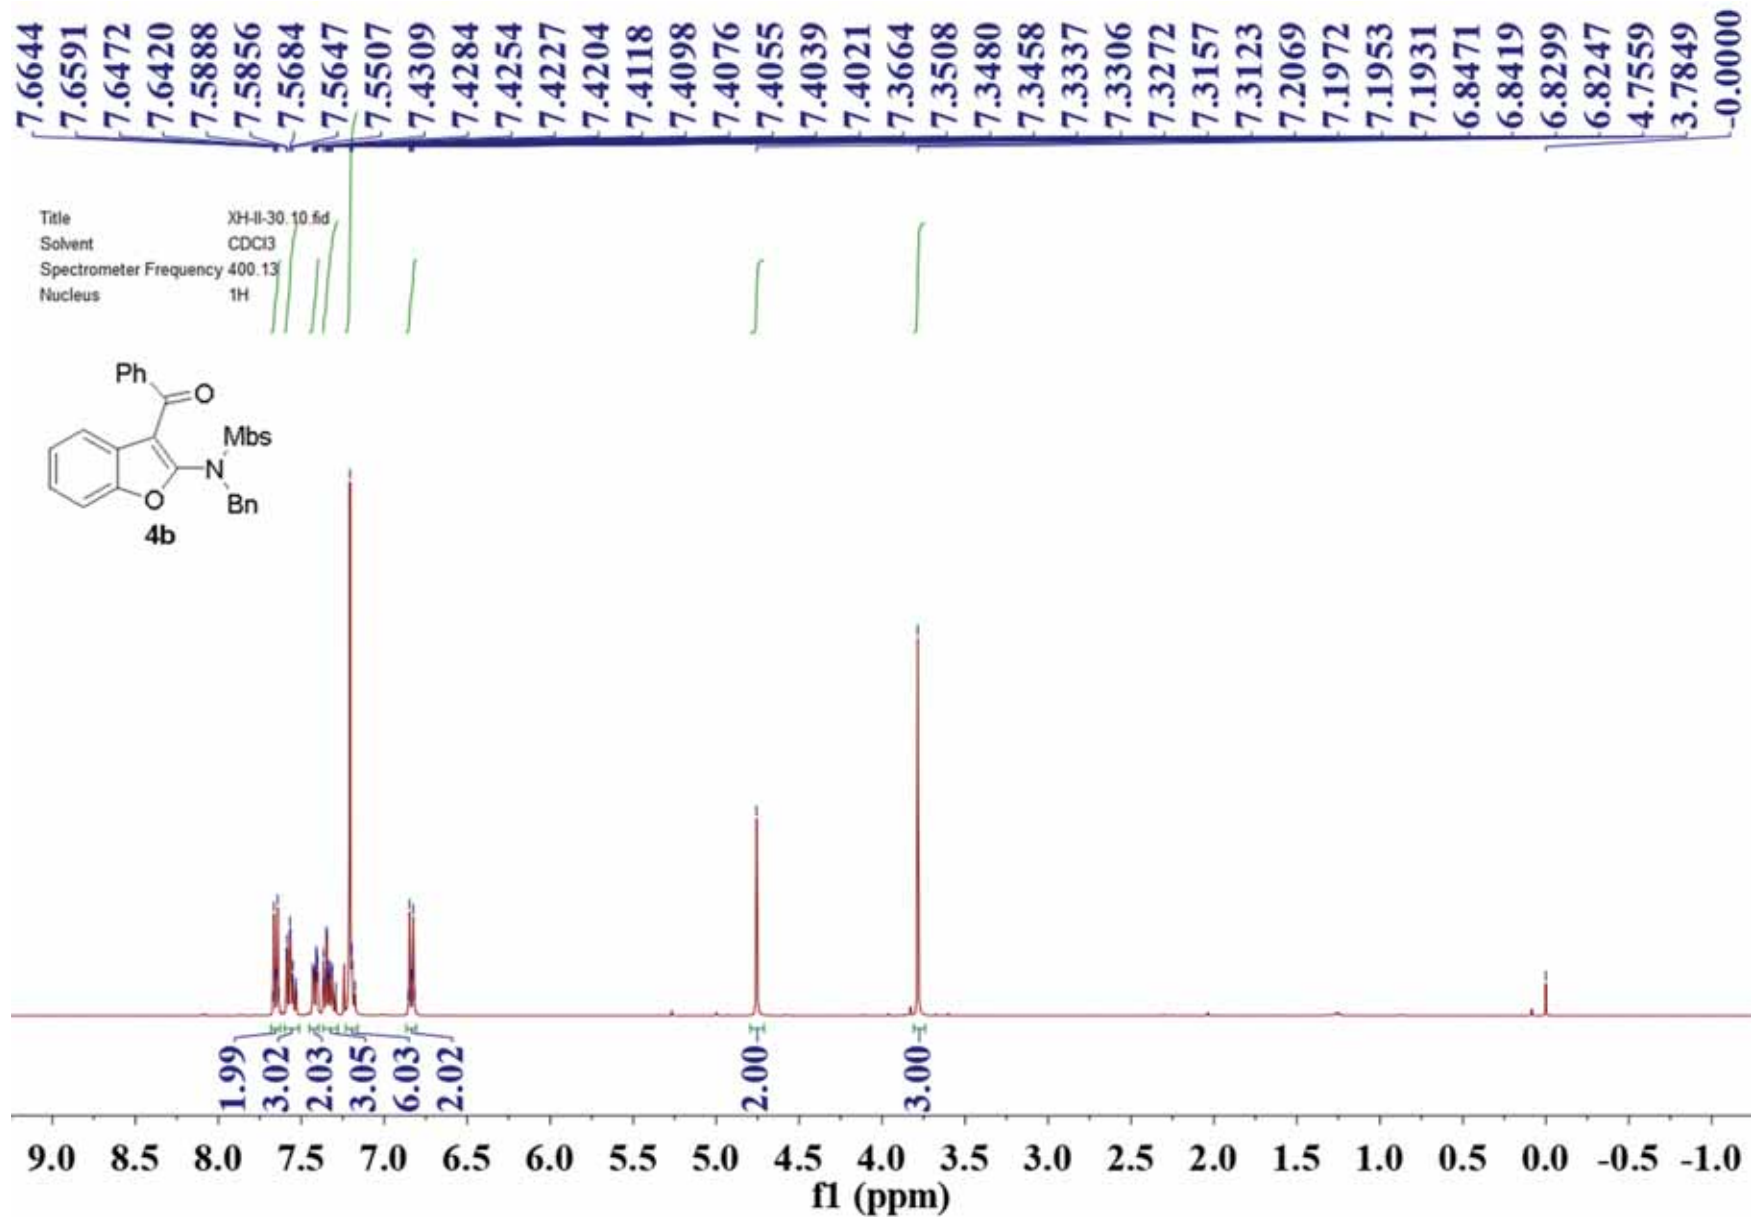

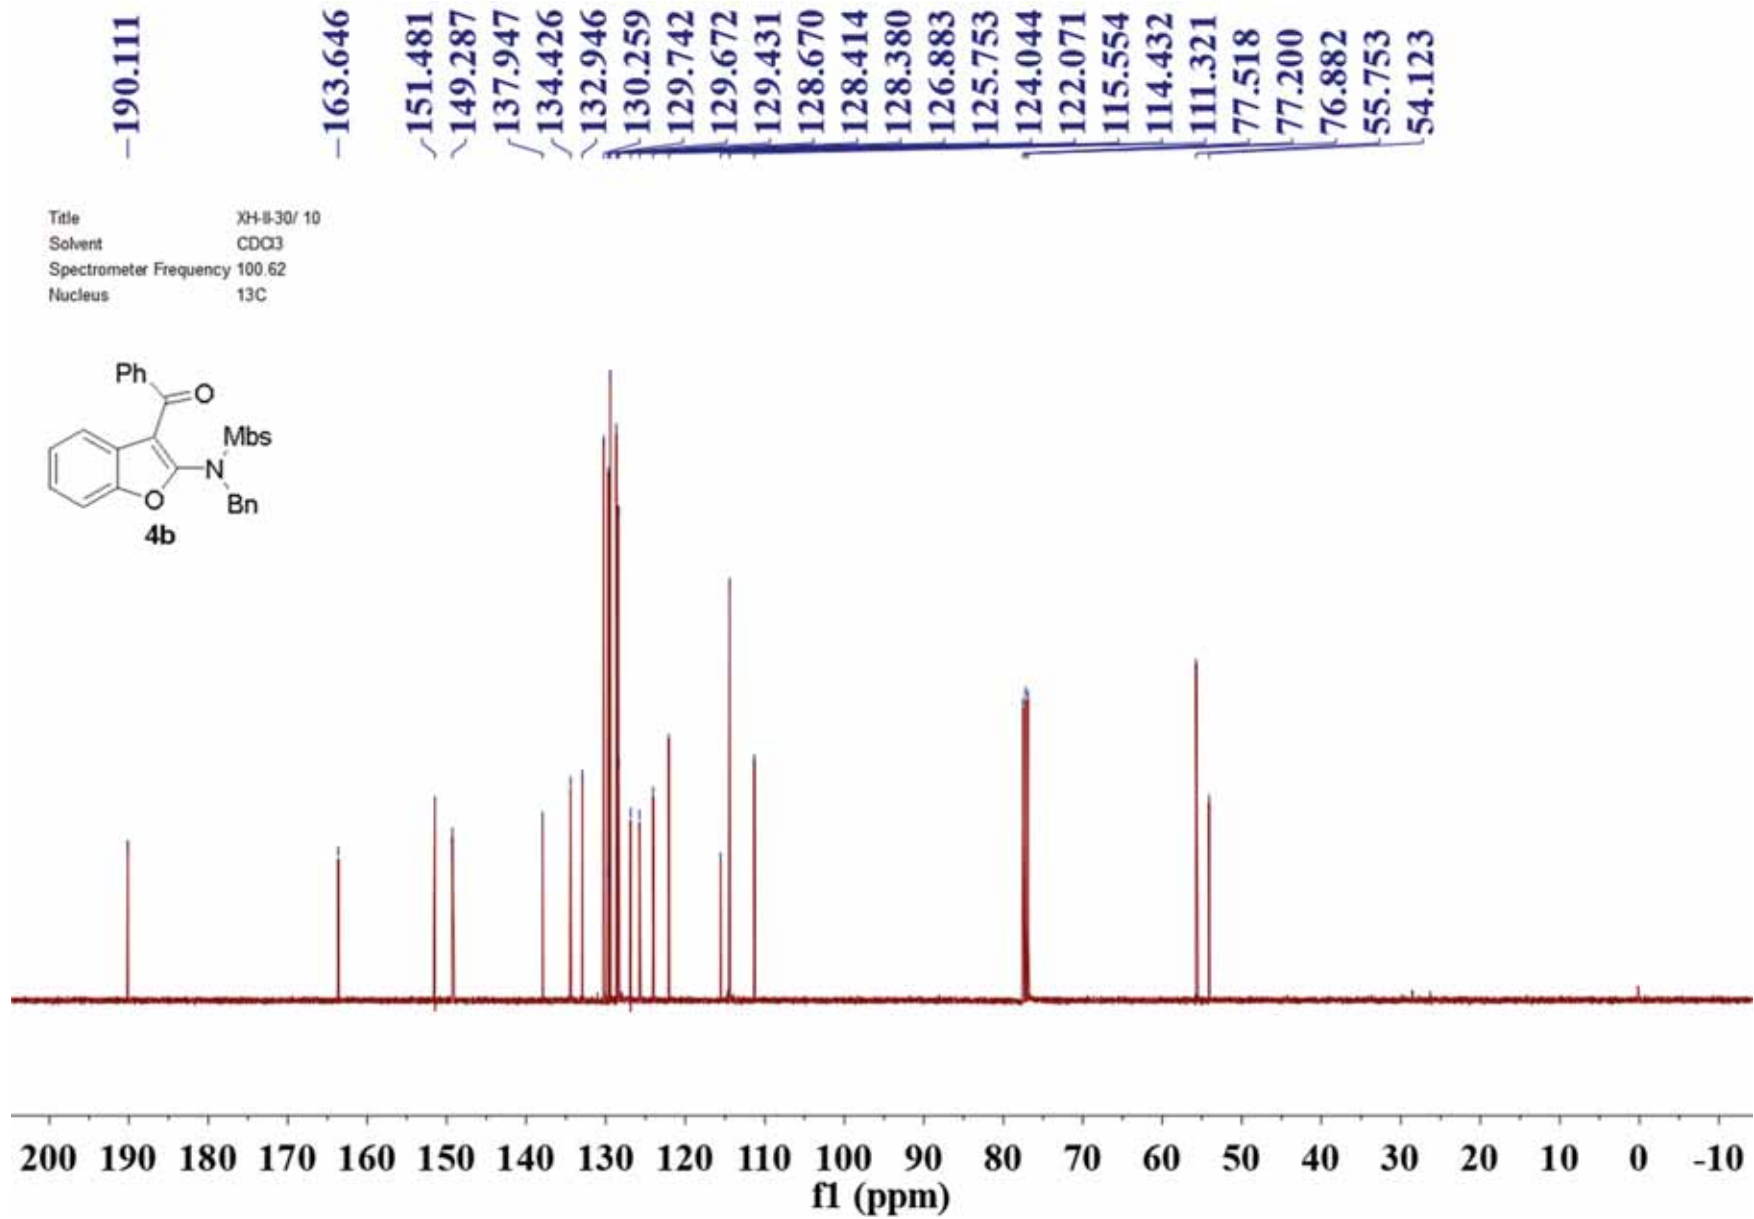

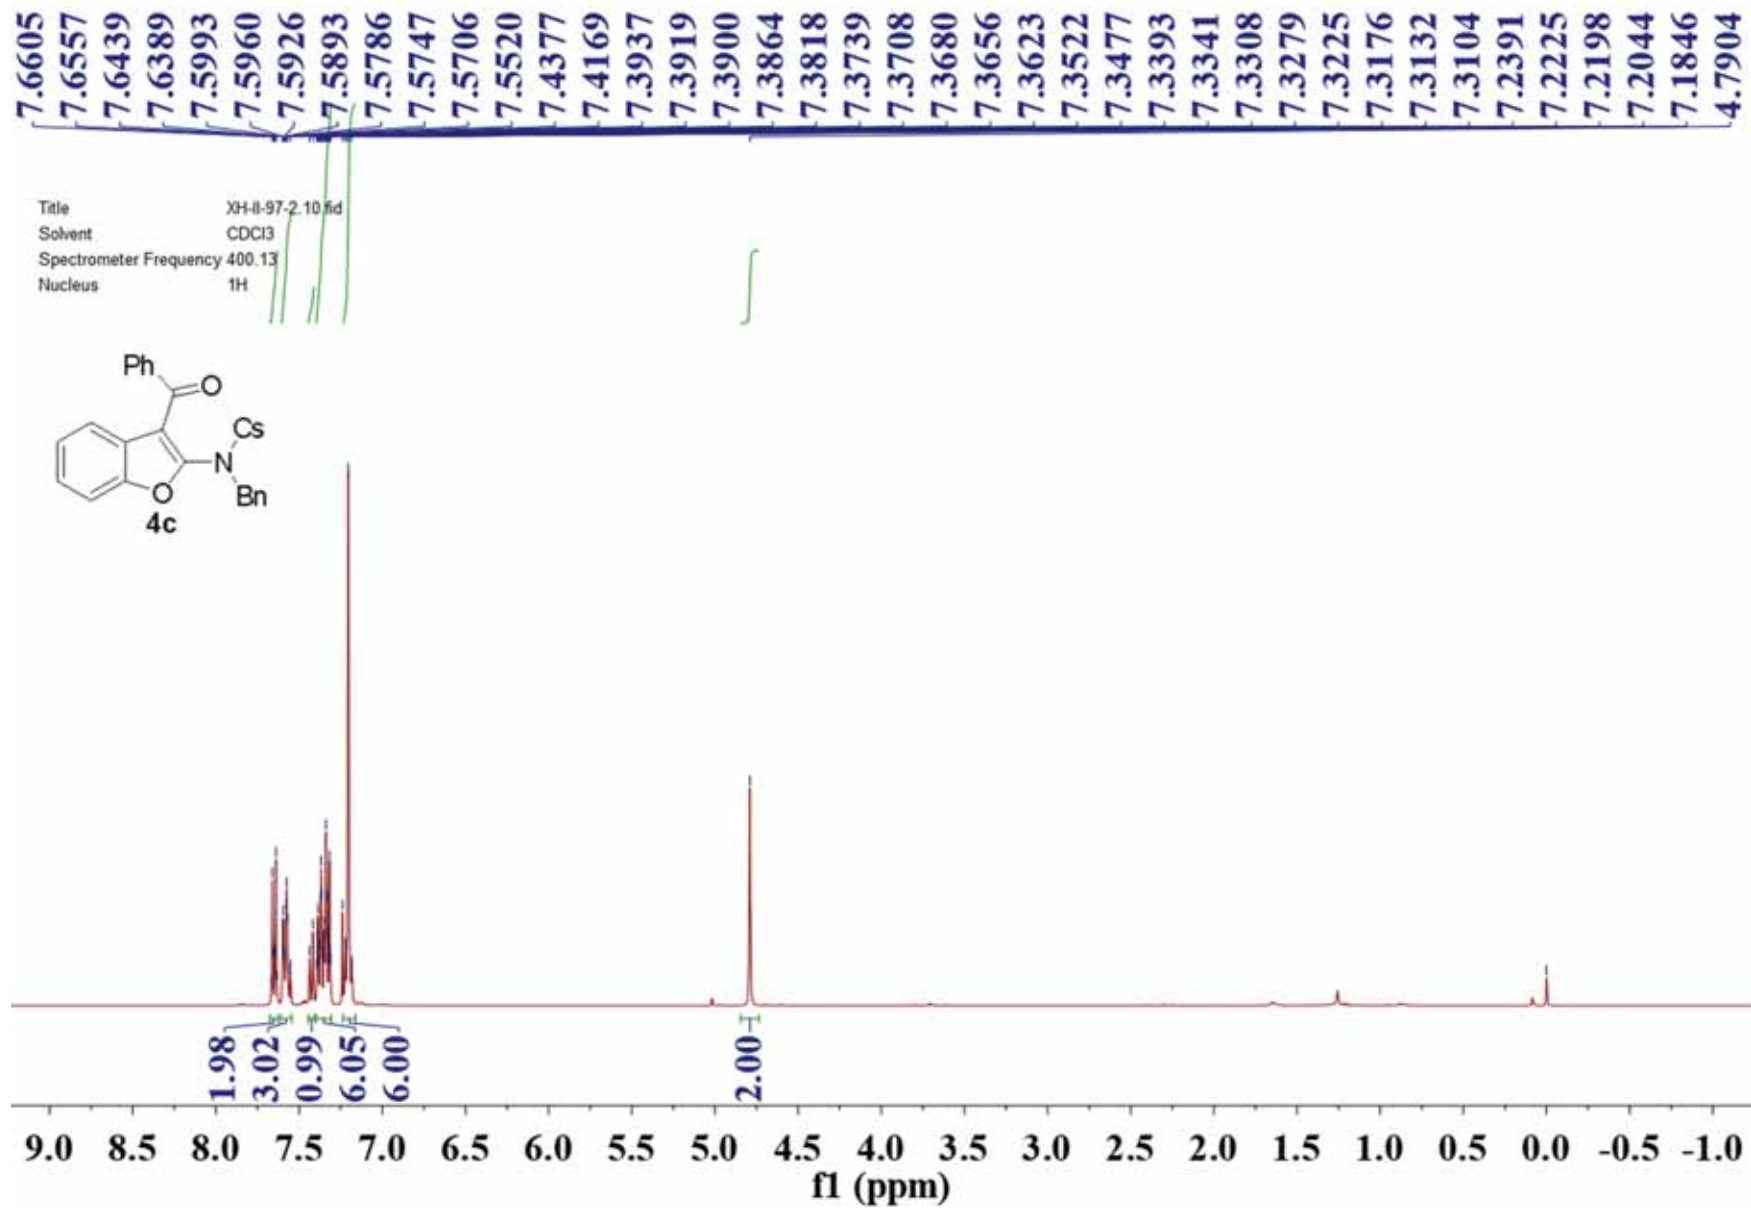

189.901  
151.504  
148.850  
140.172  
137.738  
136.968  
134.067  
133.205  
129.627  
129.527  
129.435  
129.391  
128.728  
128.509  
126.612  
126.035  
124.172  
122.135  
115.951  
111.415  
77.518  
77.200  
76.882  
54.732

Title ZH-II-97-2.10.fid  
Solvent CDCl3  
Spectrometer Frequency 100.62  
Nucleus 13C

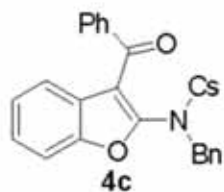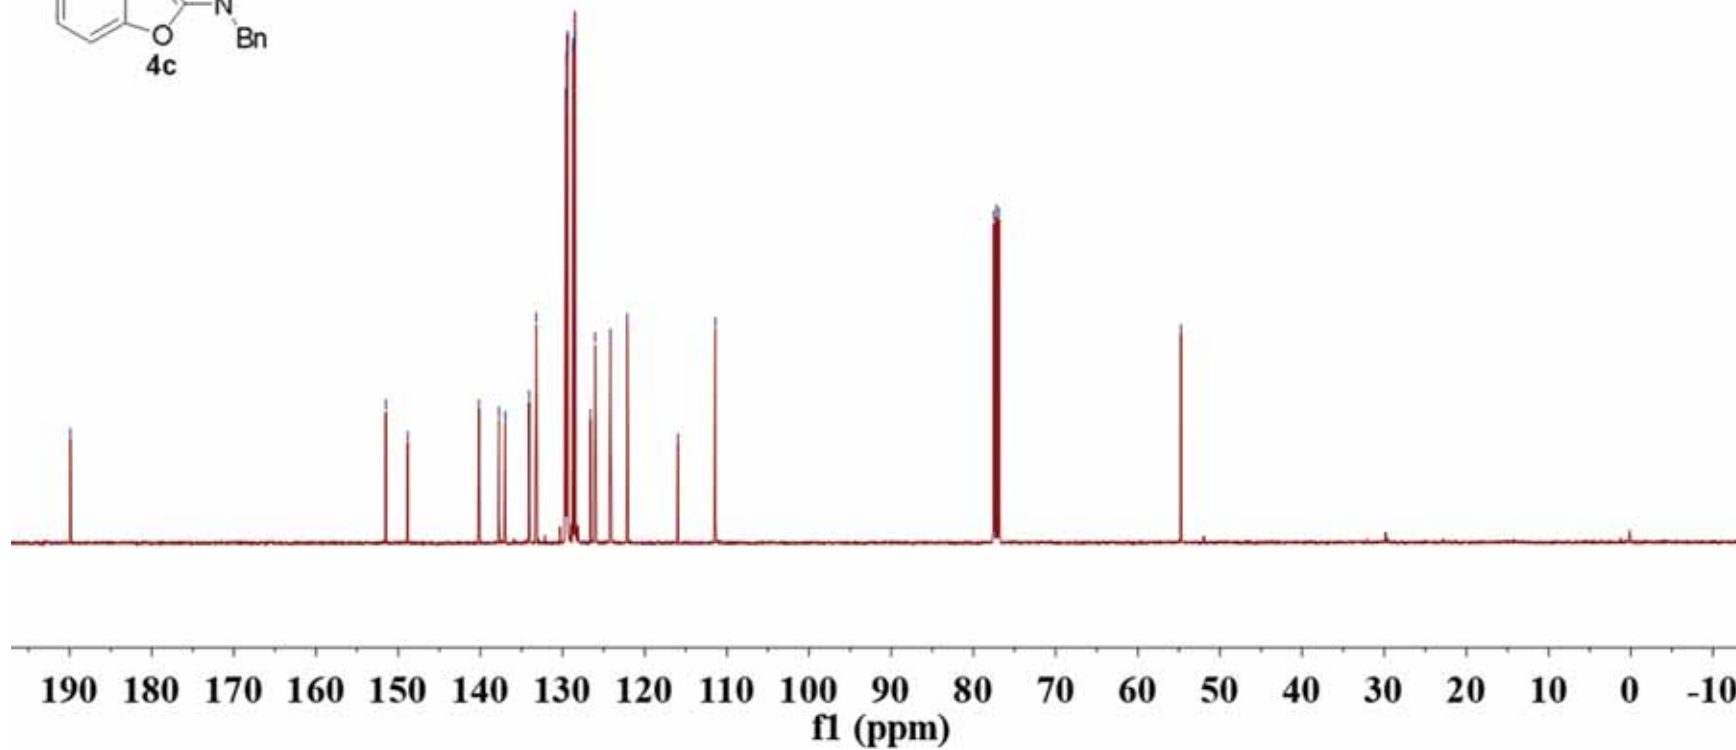

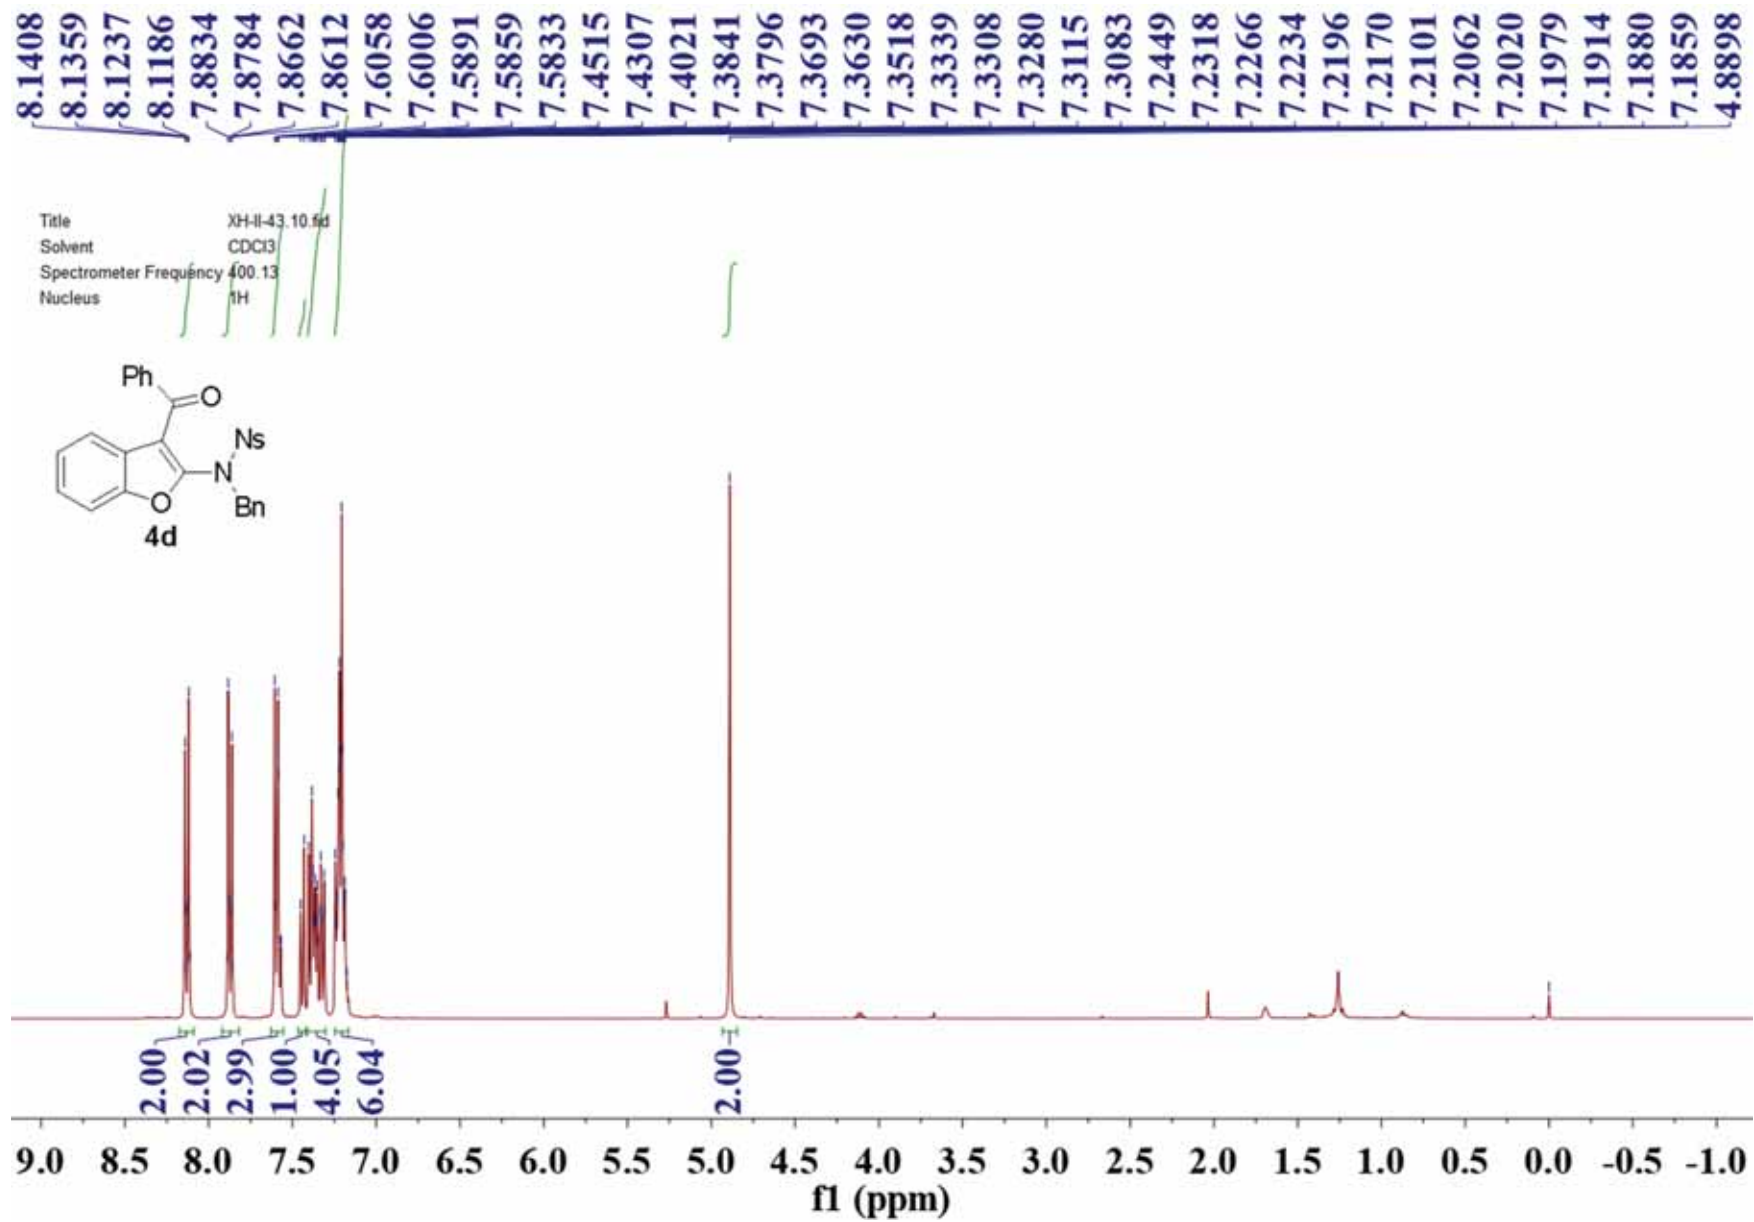

189.583  
151.541  
150.288  
148.611  
144.309  
137.412  
133.862  
133.542  
129.583  
129.302  
129.218  
128.759  
128.627  
128.562  
126.343  
126.203  
124.285  
124.271  
122.146  
116.361  
111.572  
77.518  
77.200  
76.882  
-55.671

Title XH-843/ 10  
Solvent CDCl<sub>3</sub>  
Spectrometer Frequency 100.62  
Nucleus <sup>13</sup>C

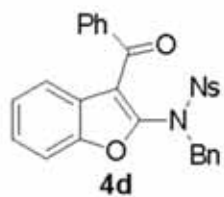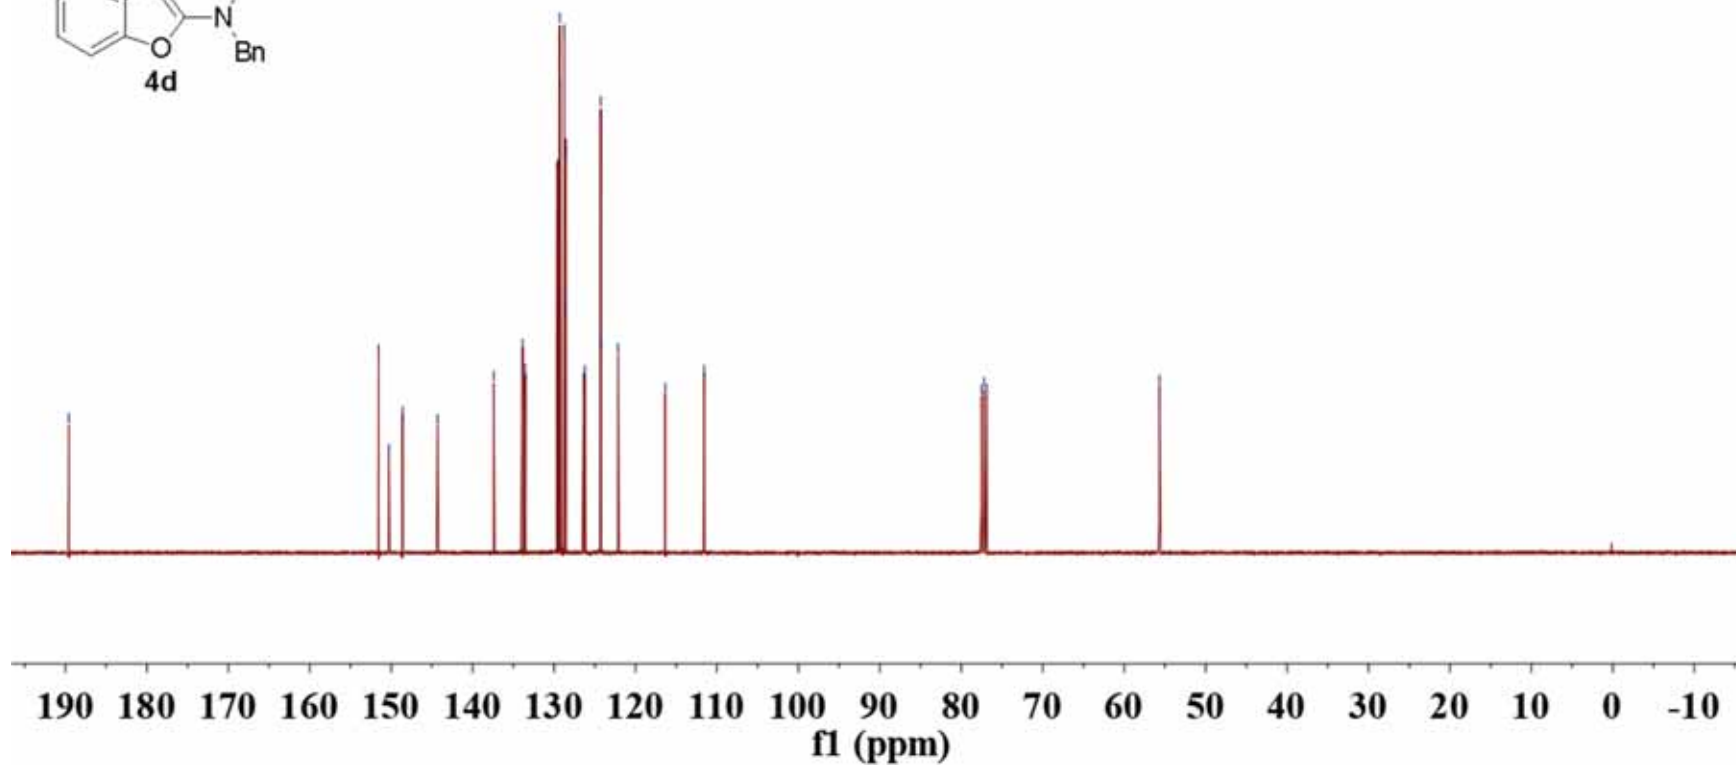

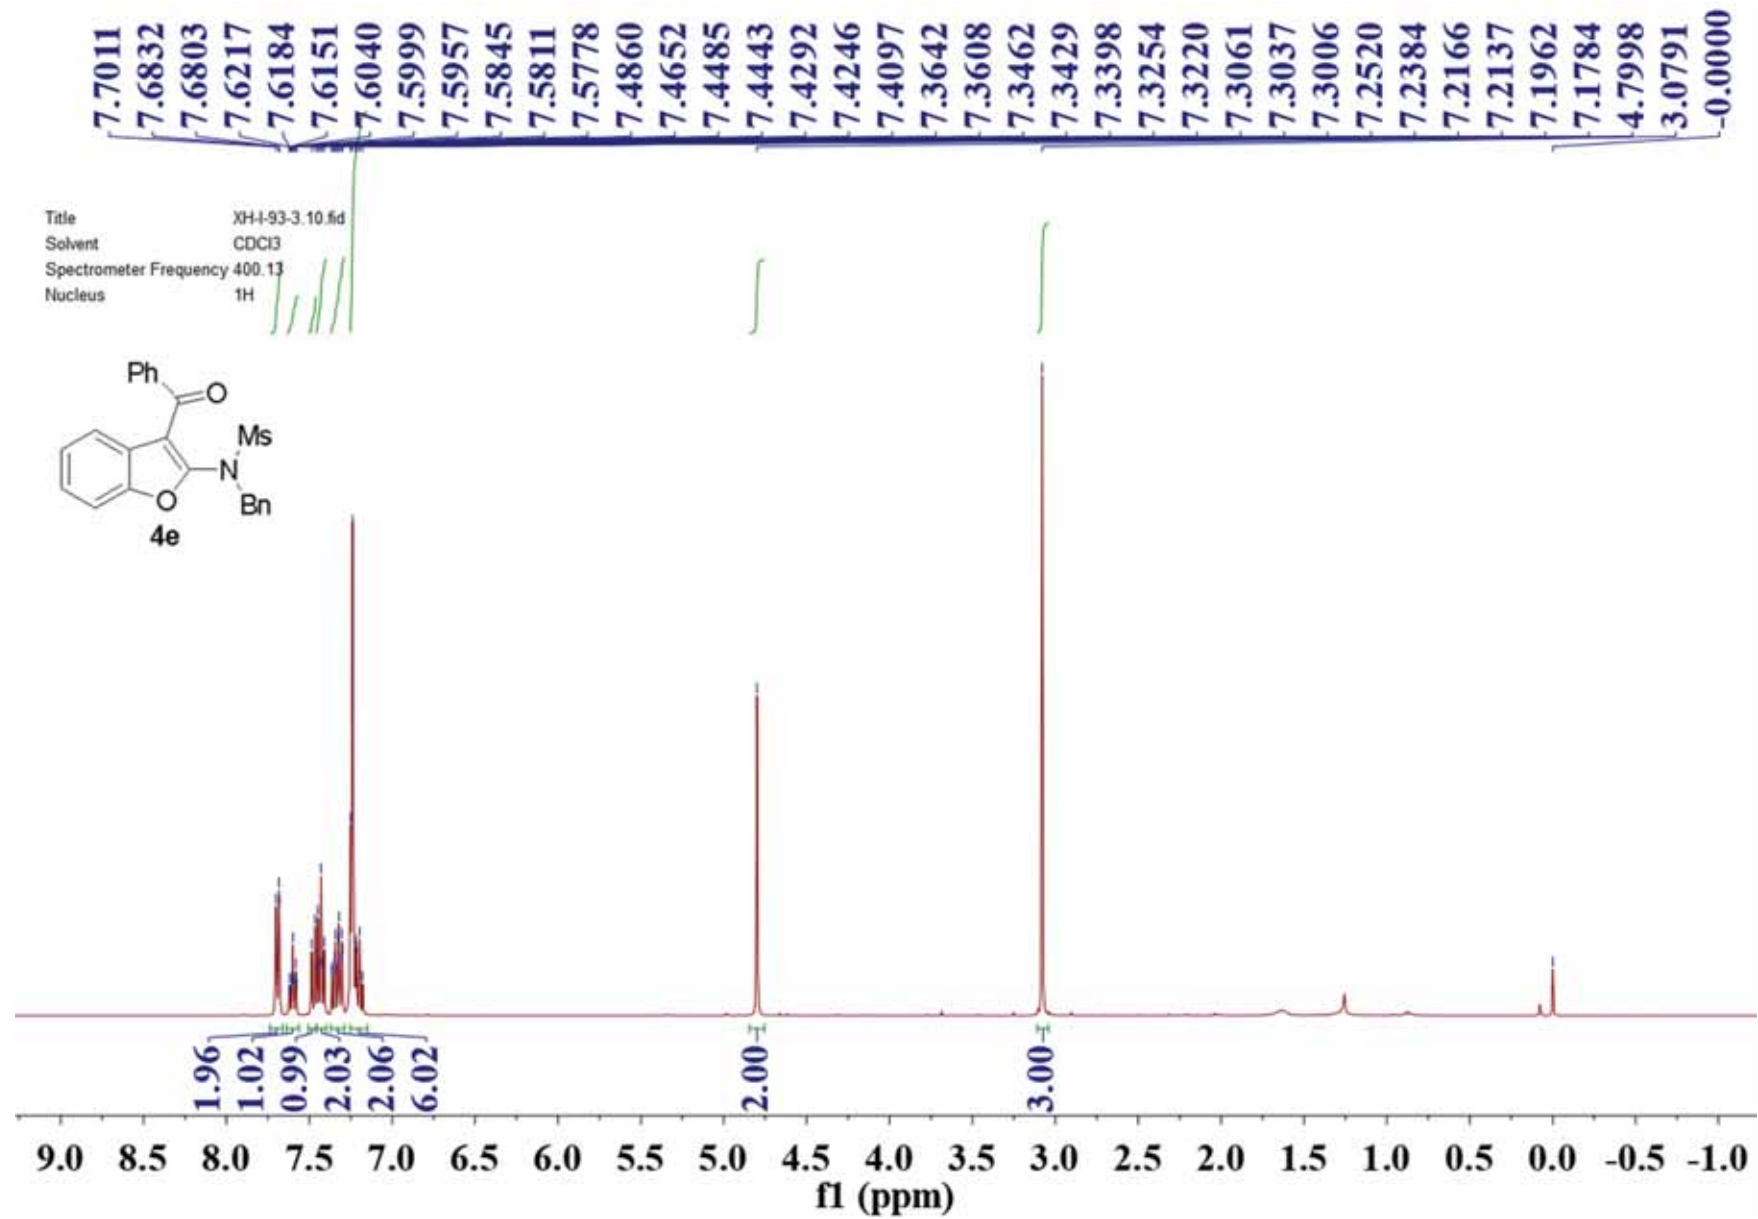

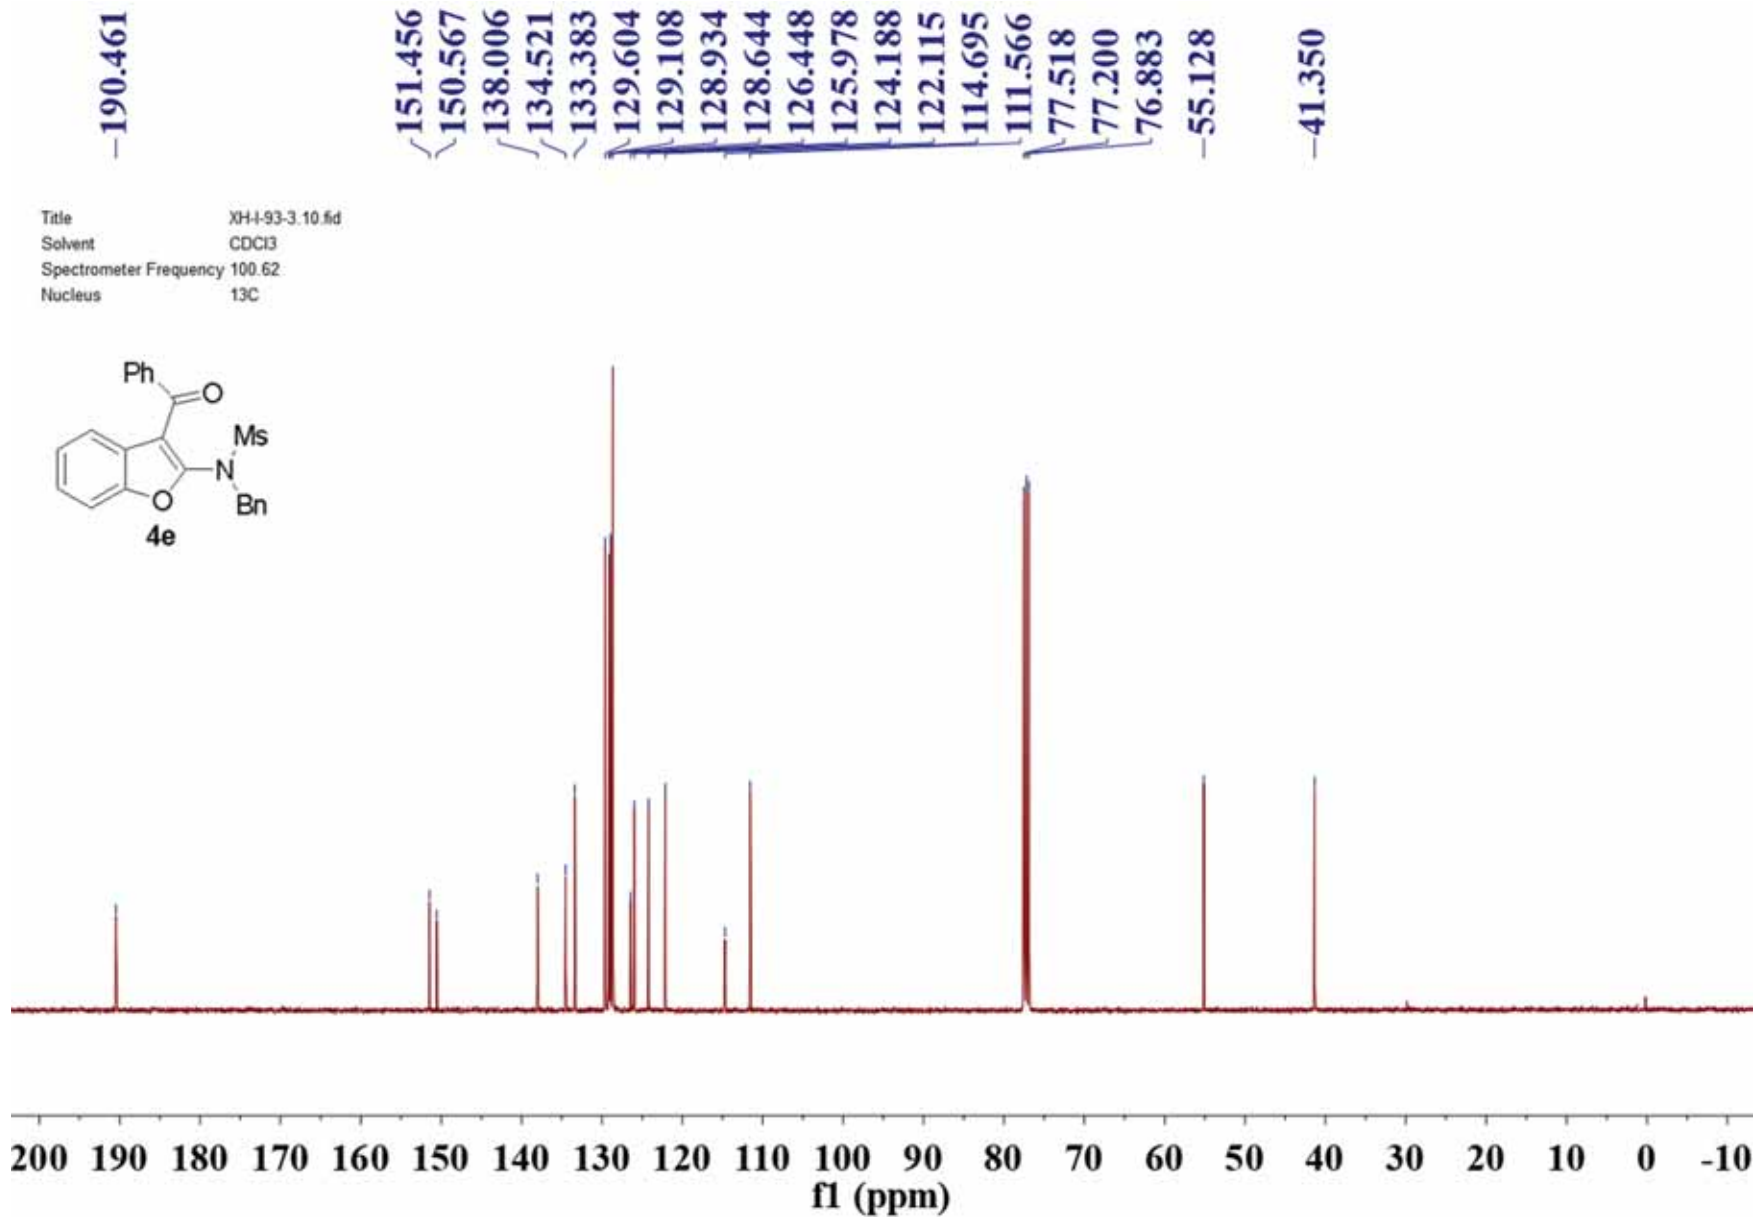



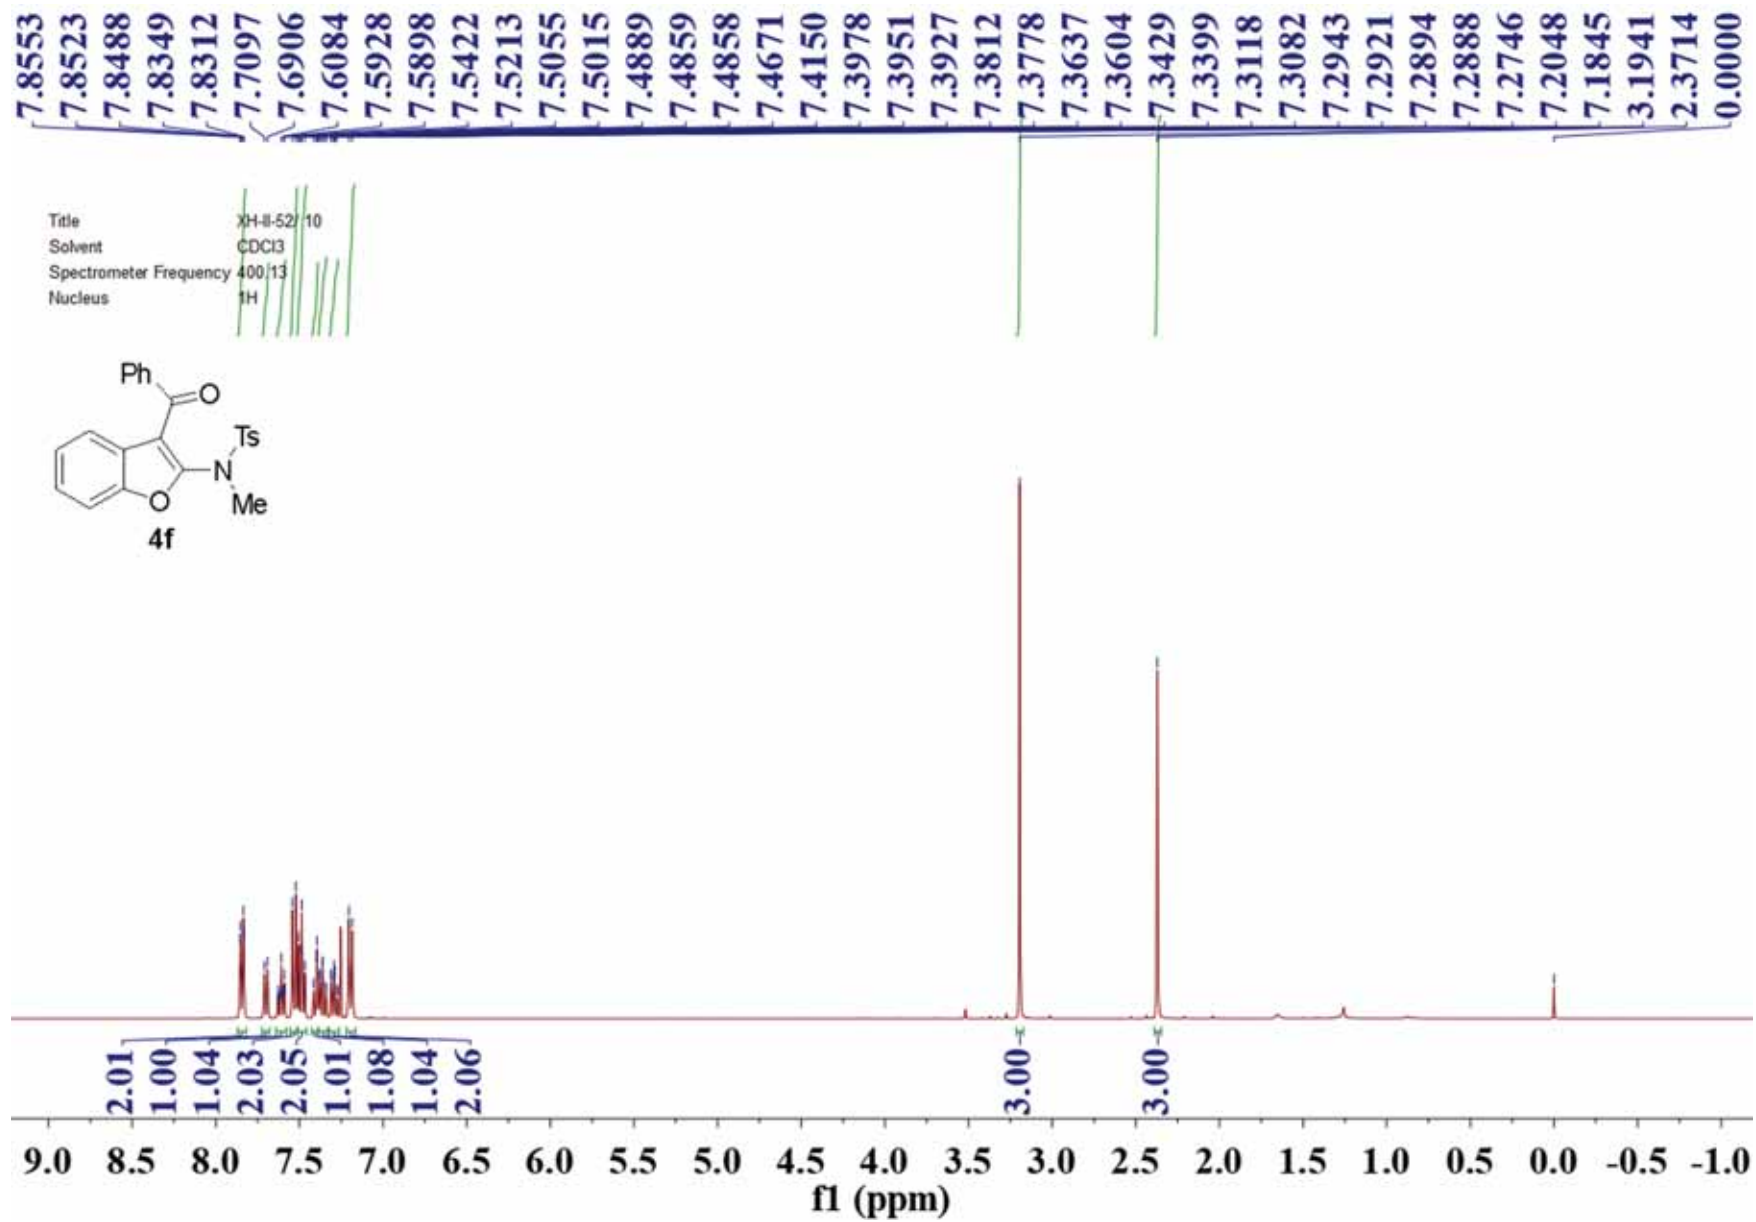

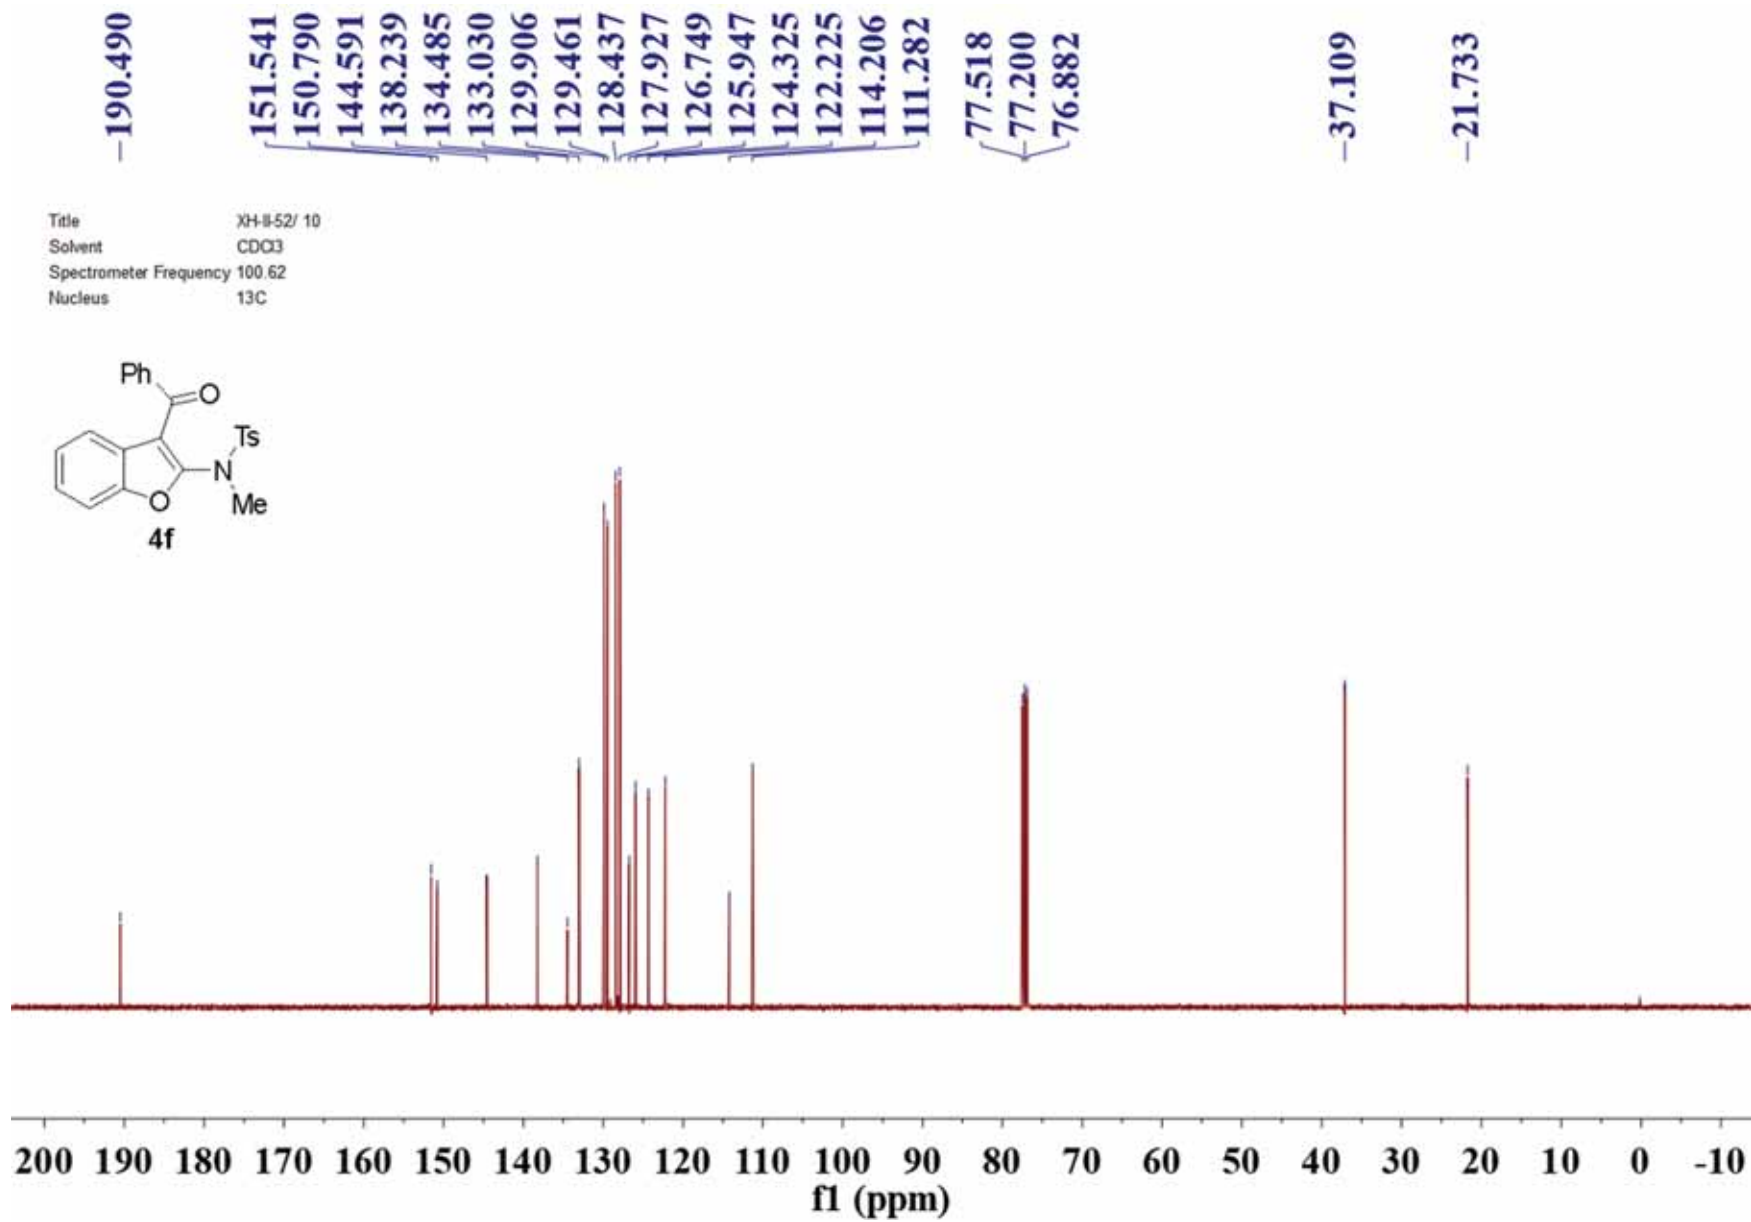

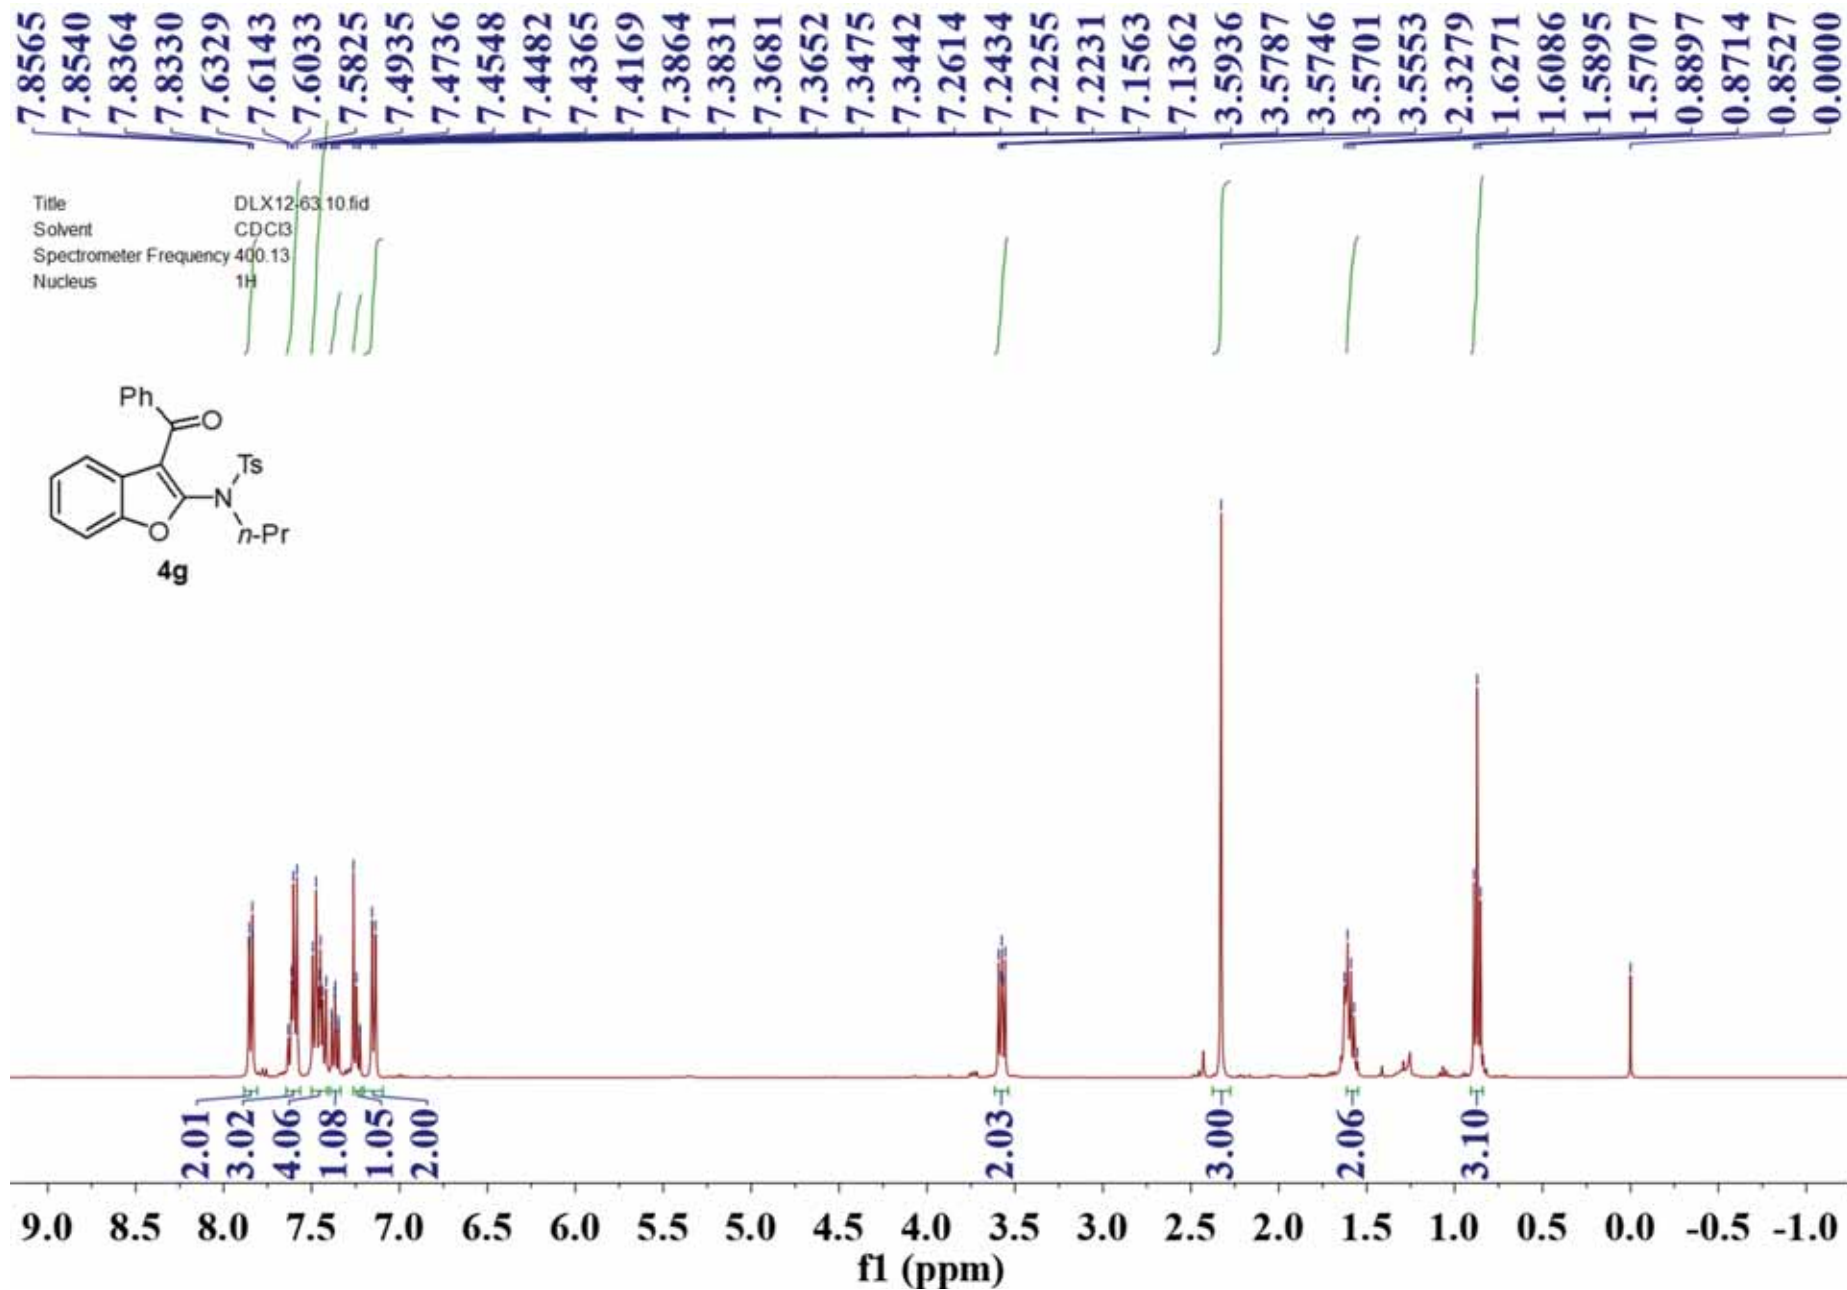

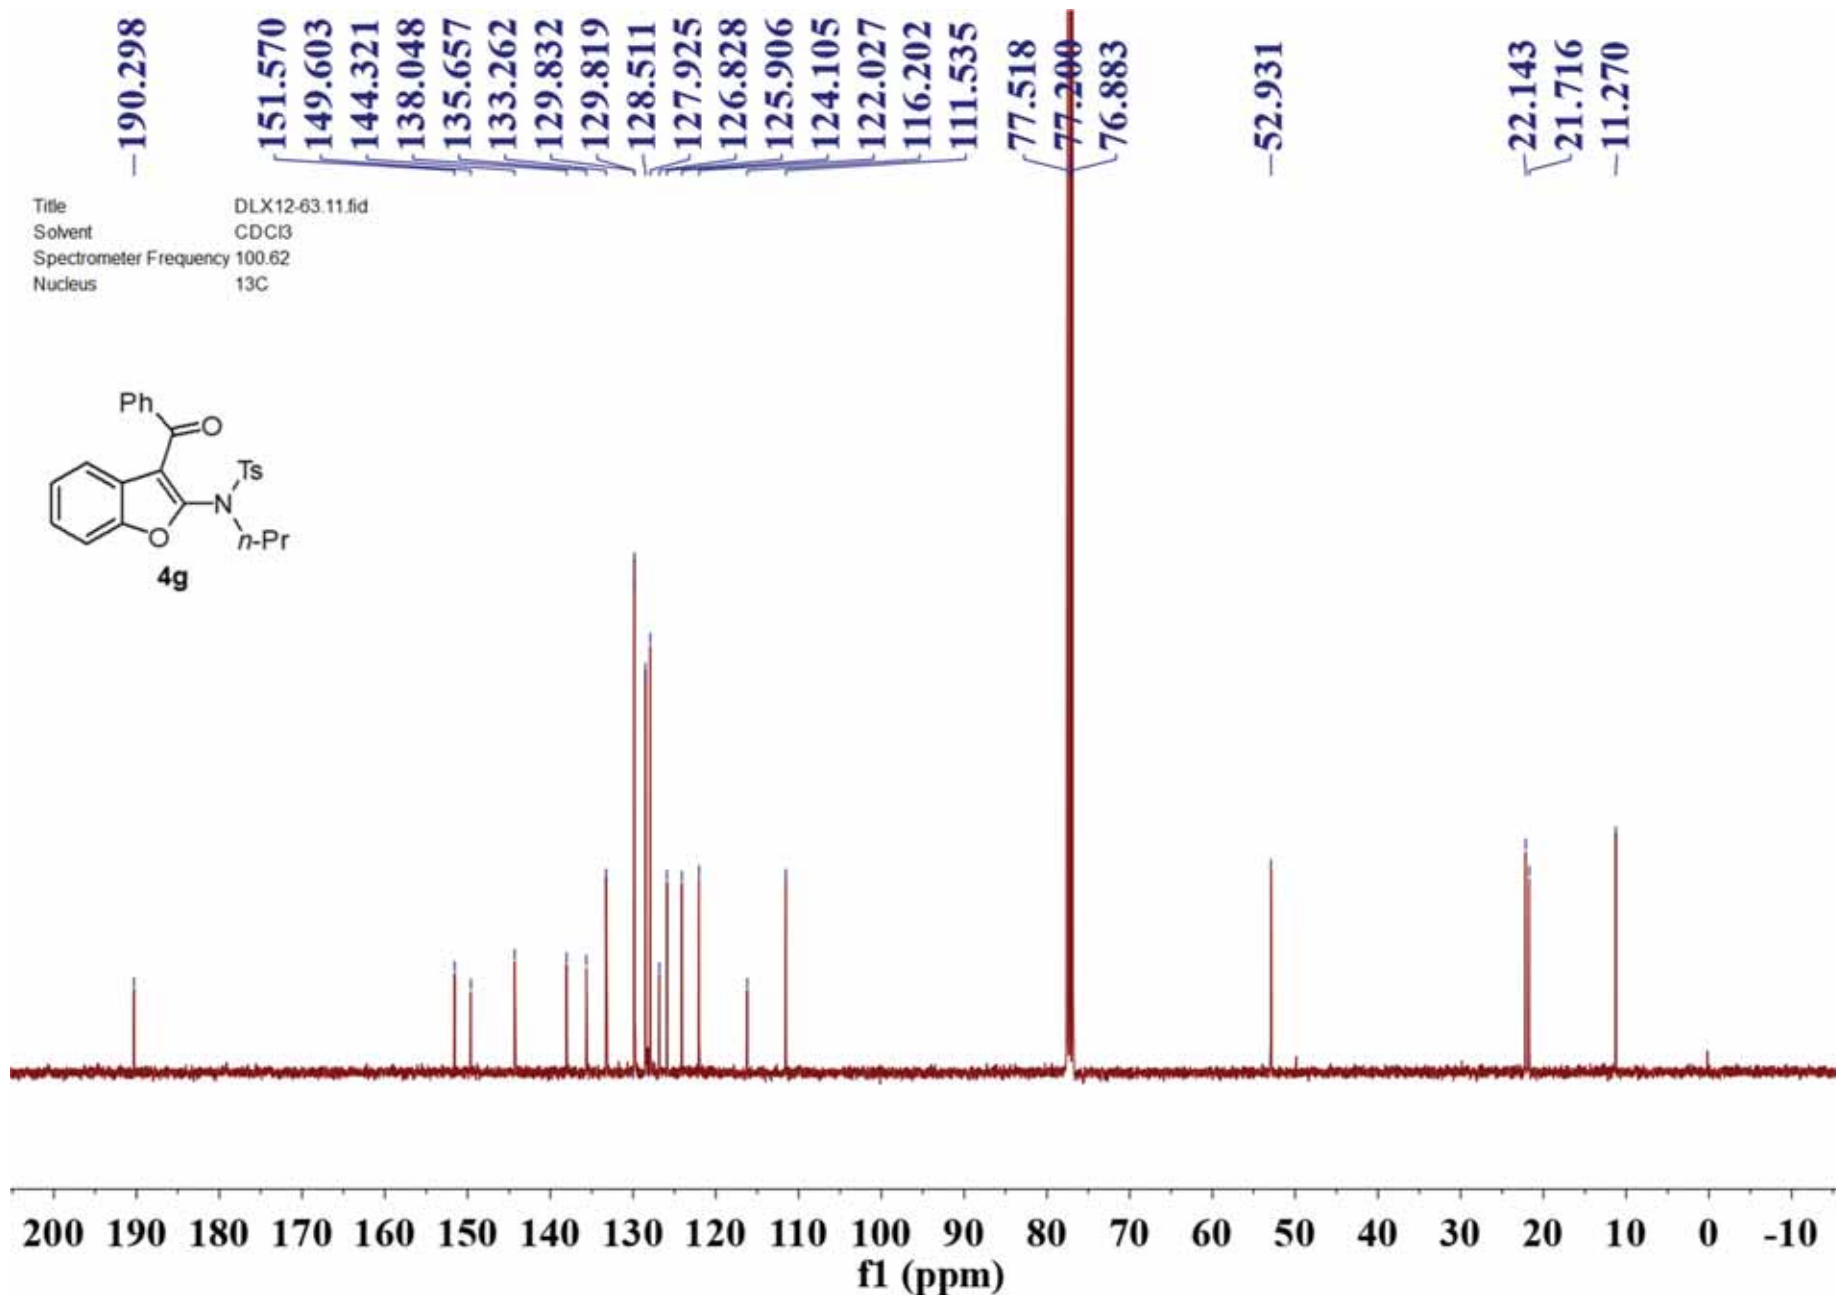

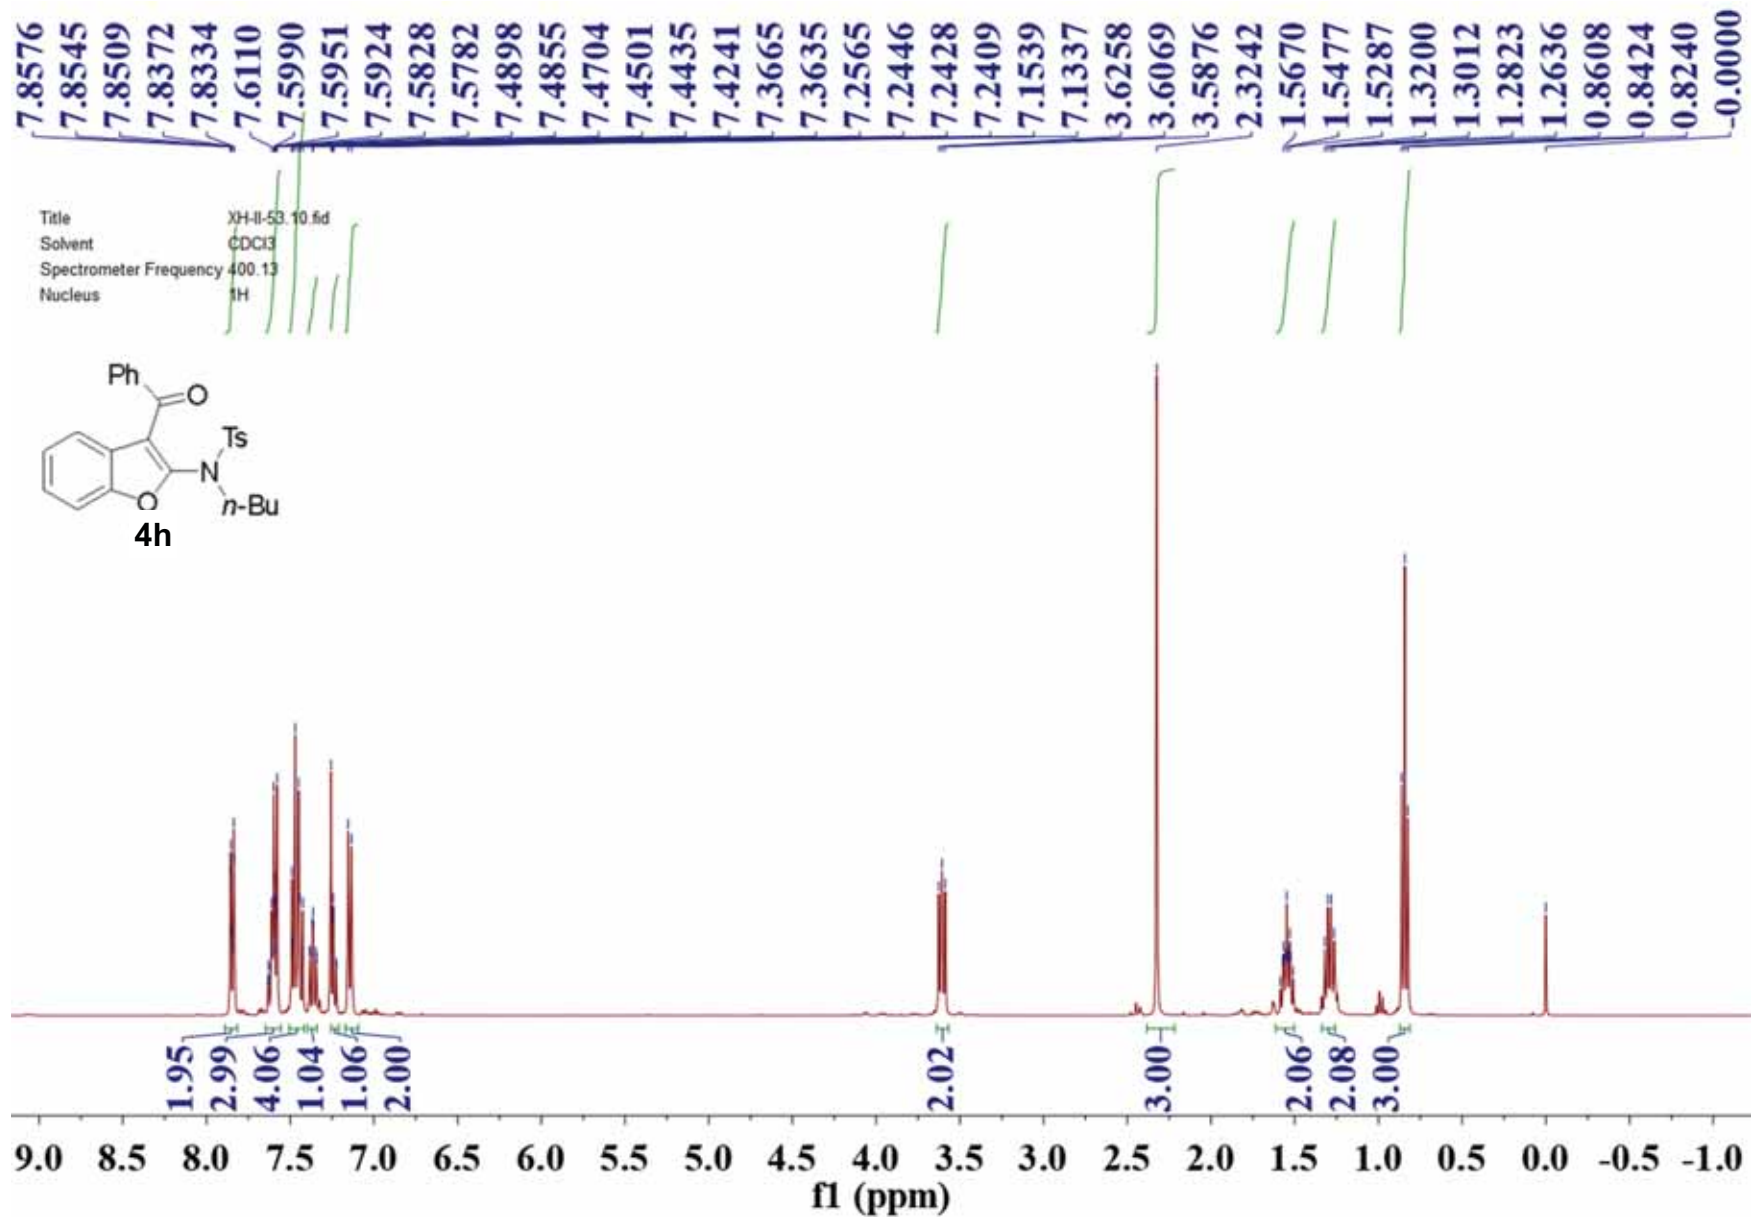

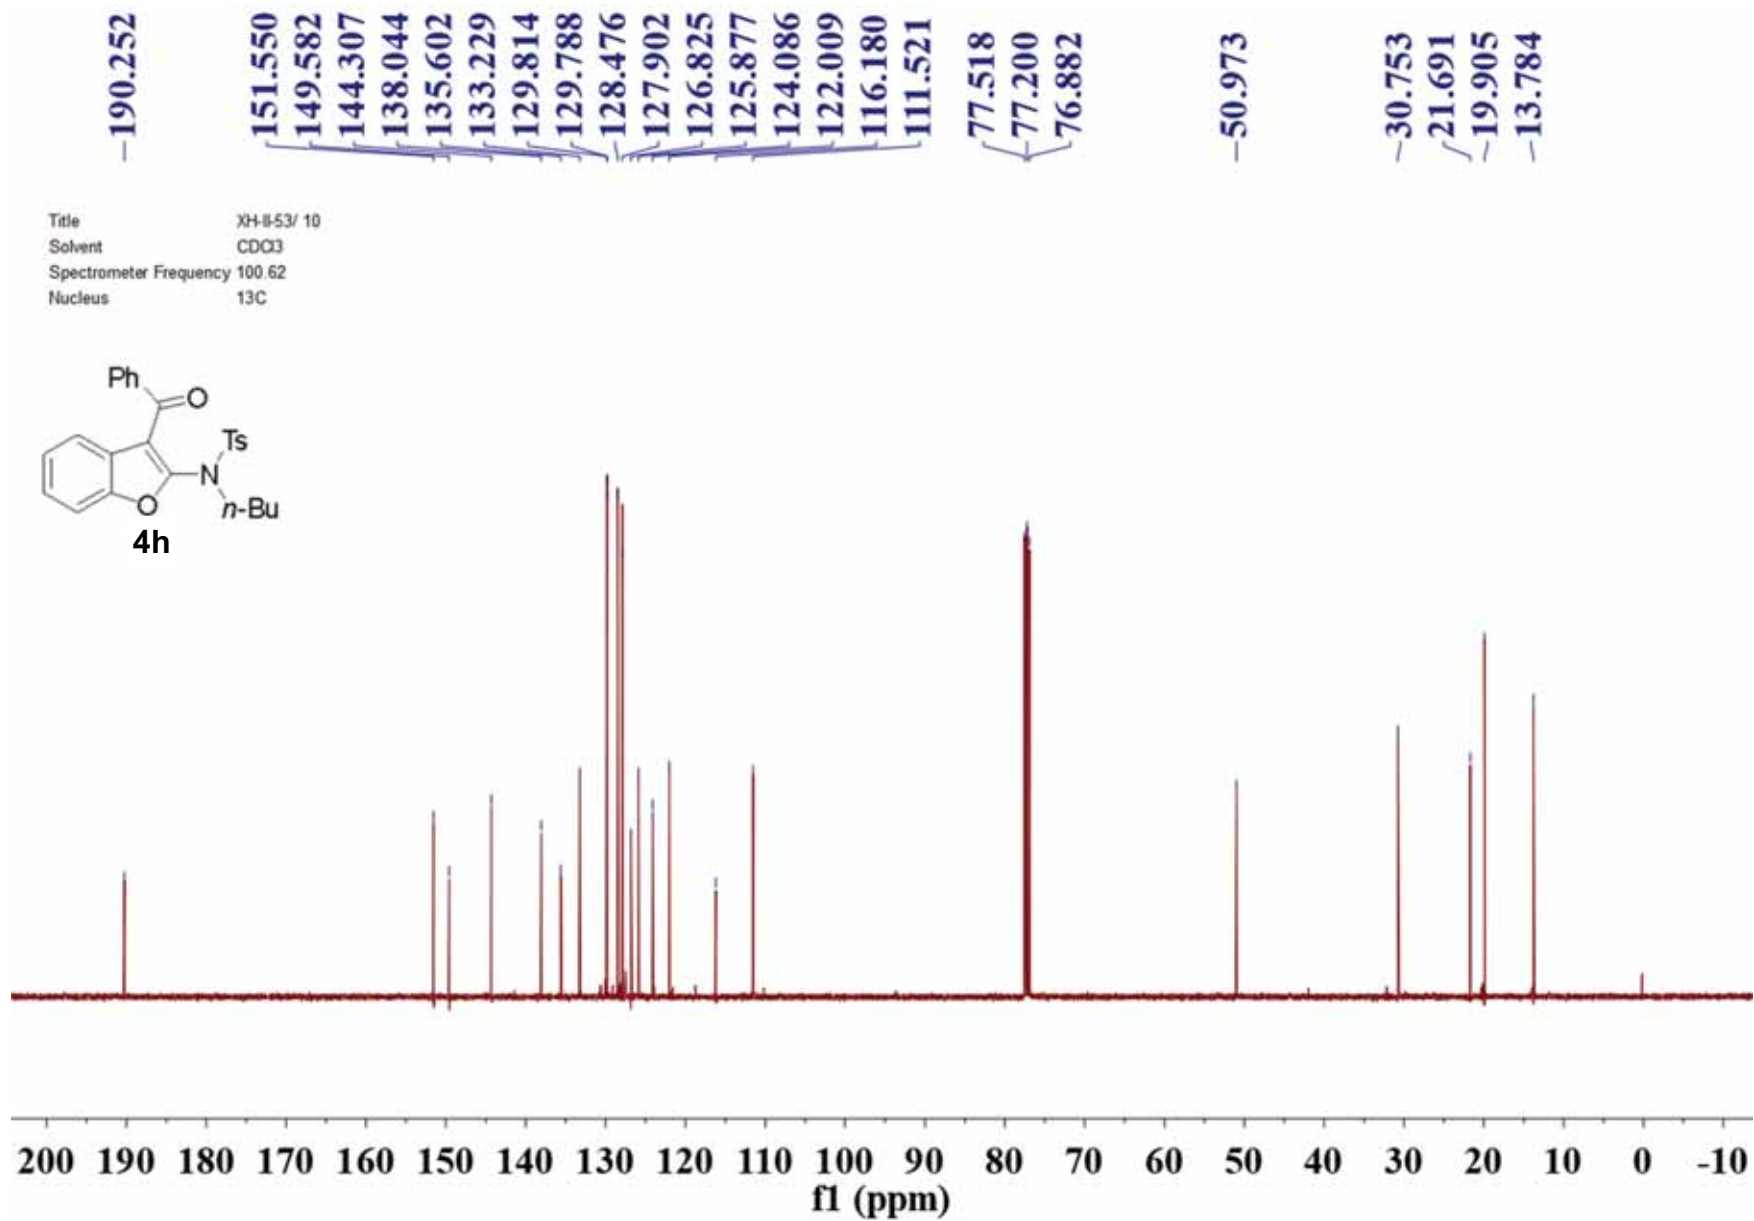

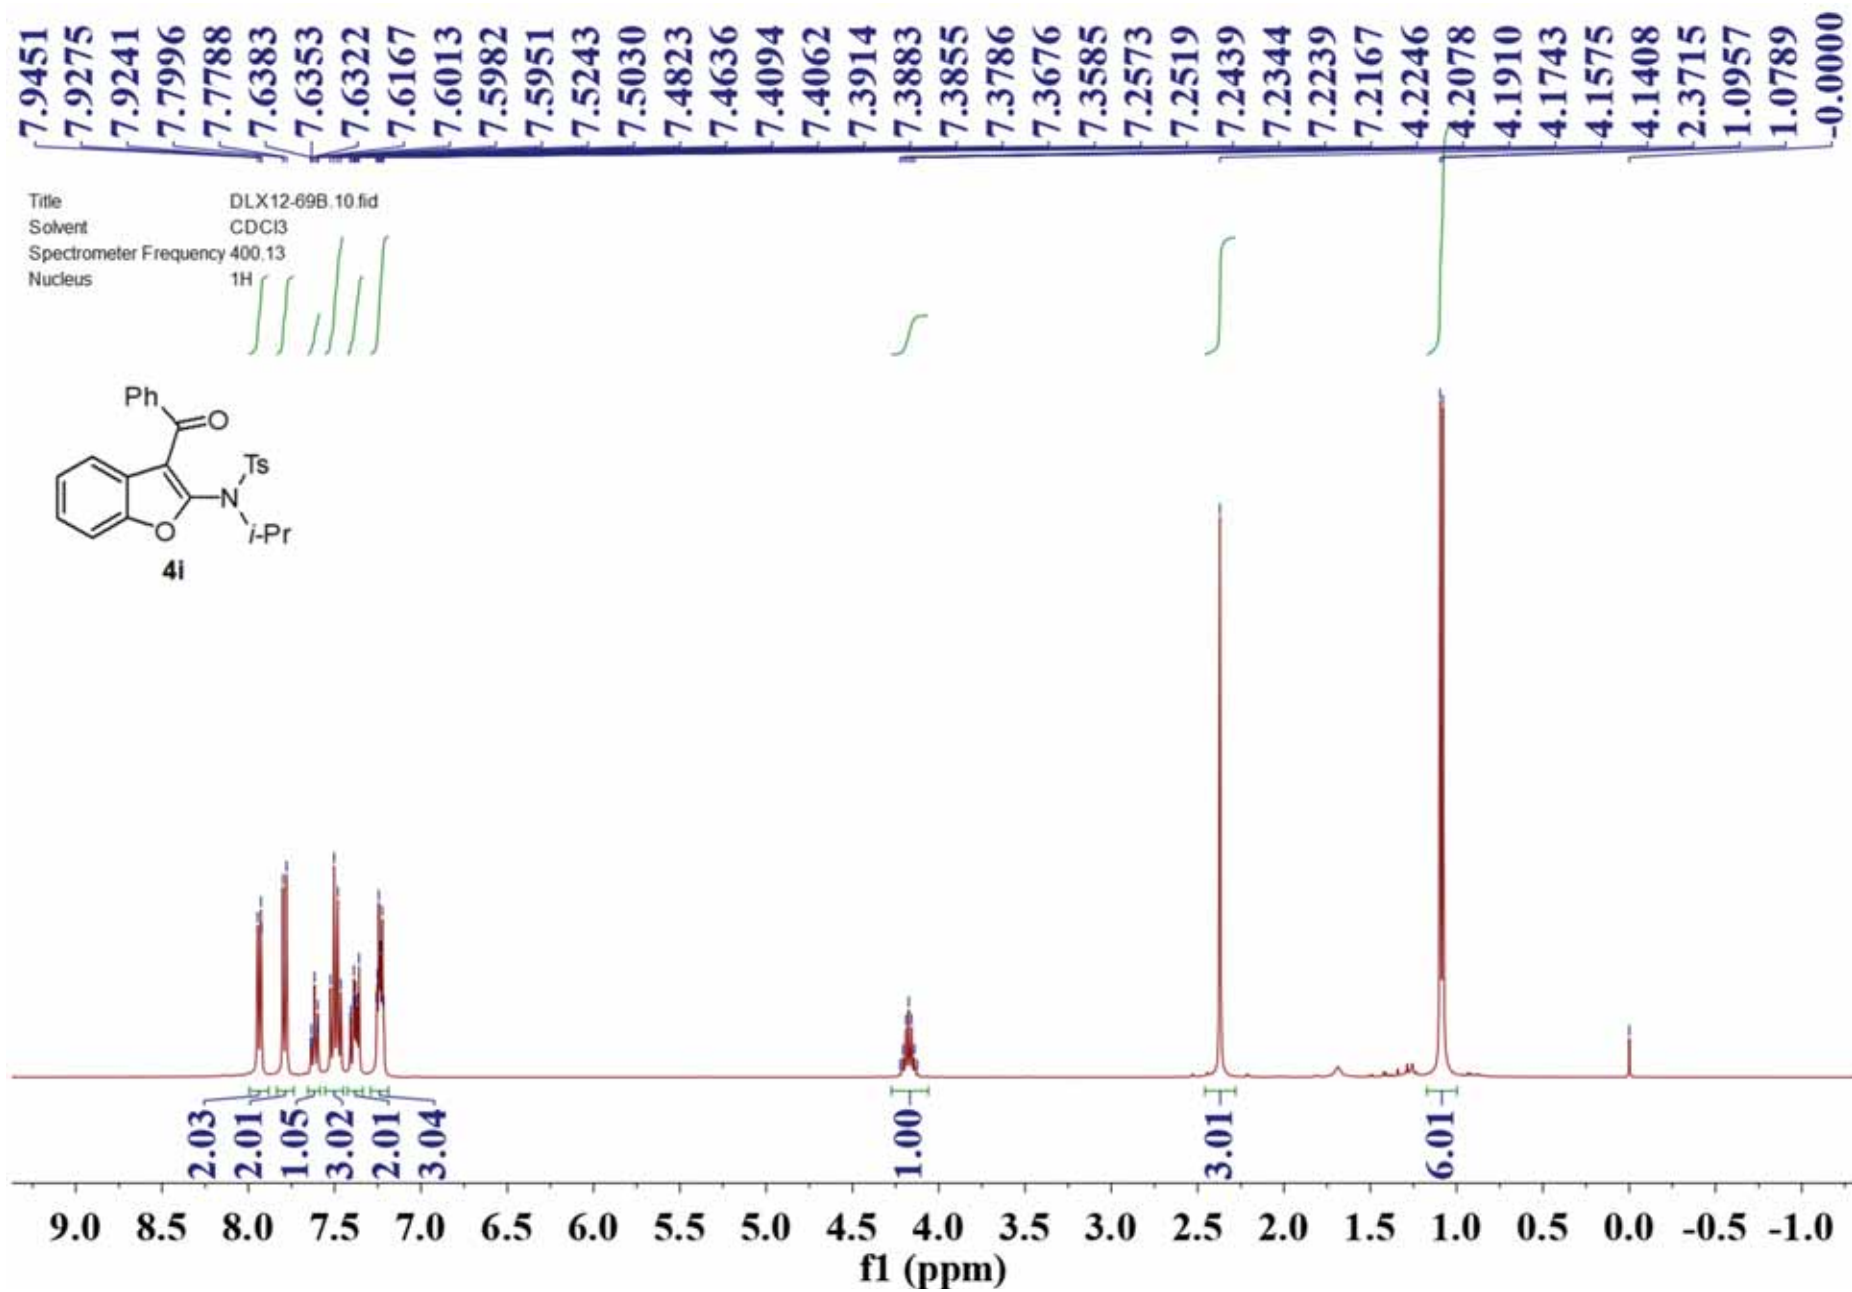

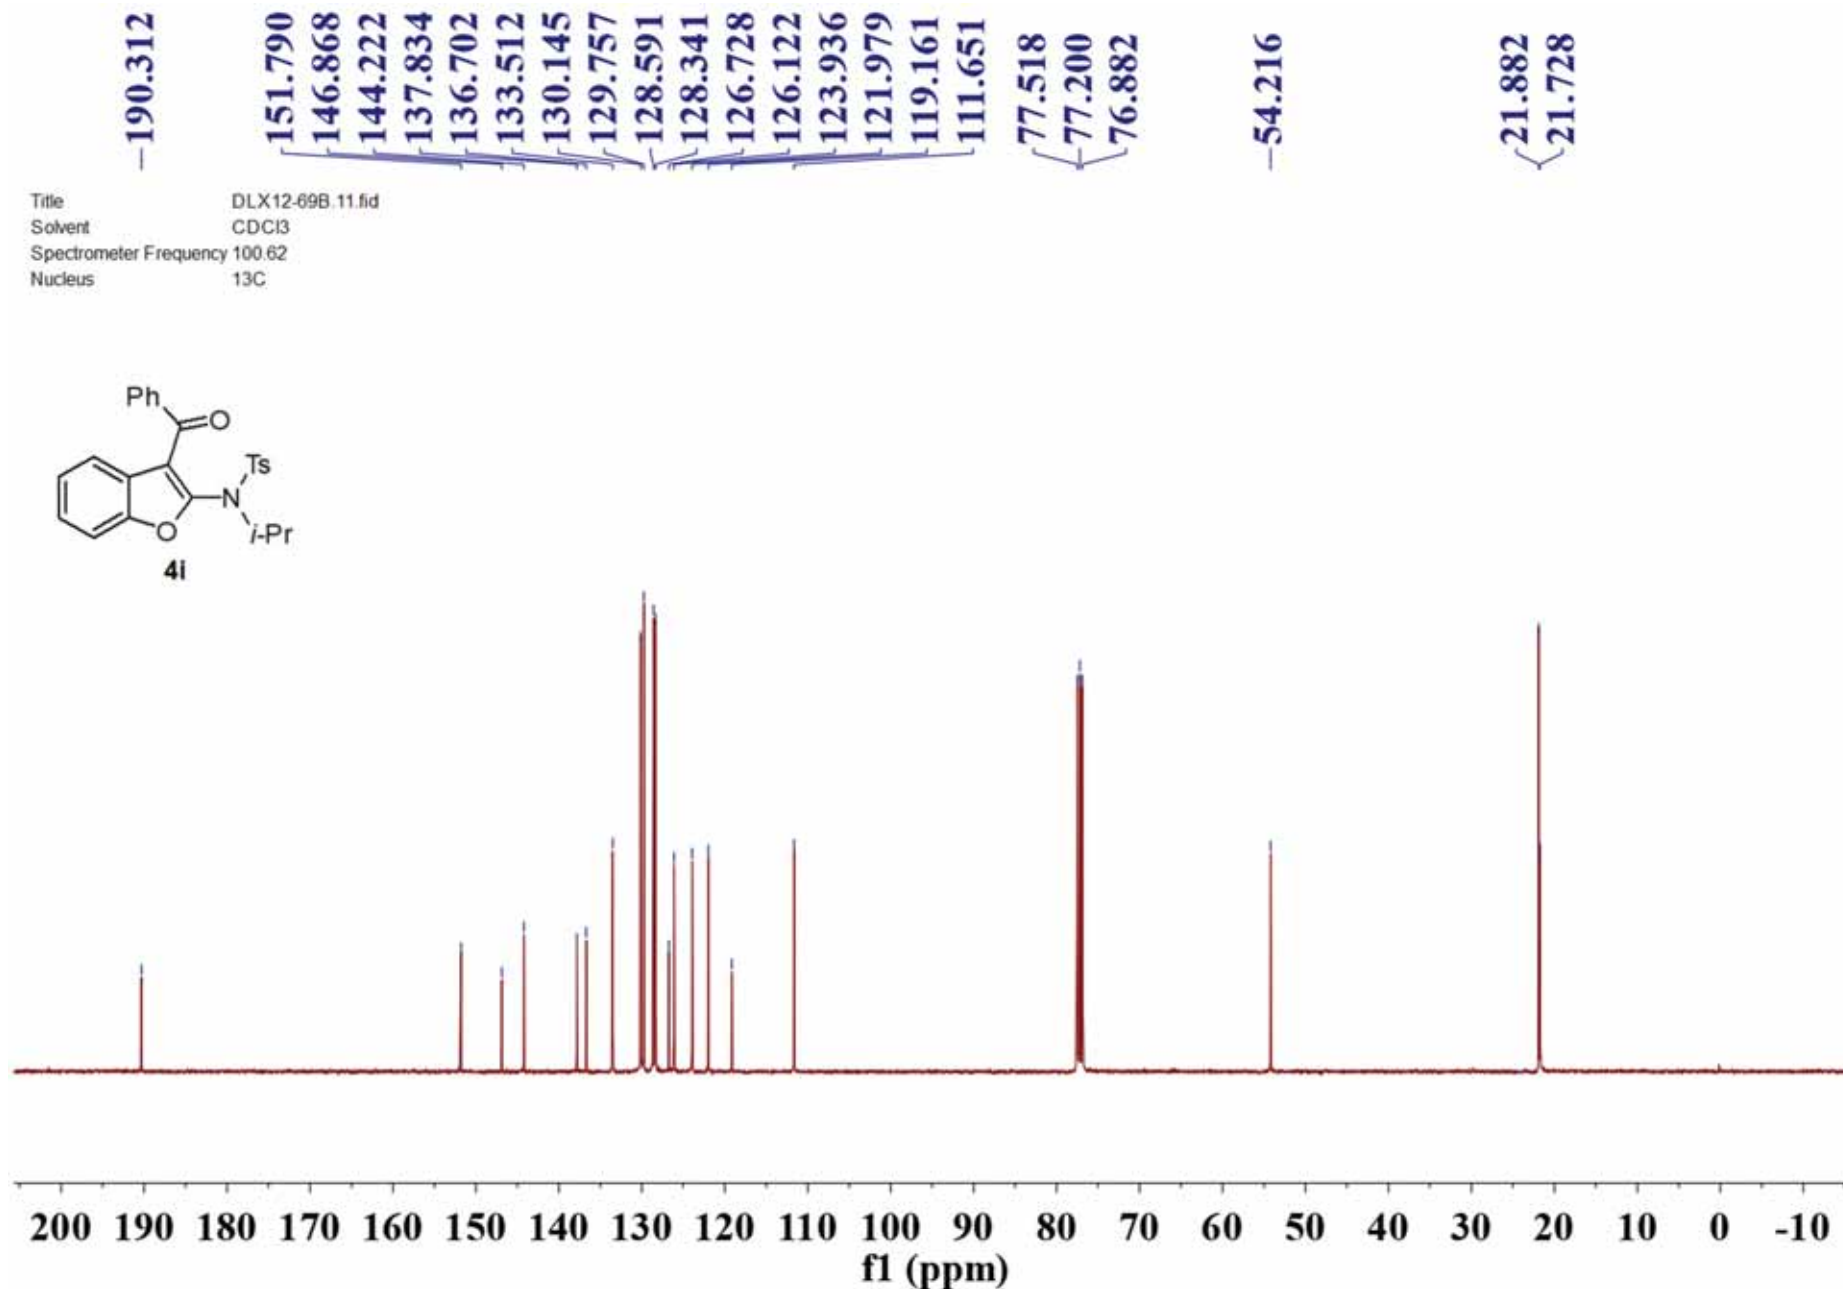



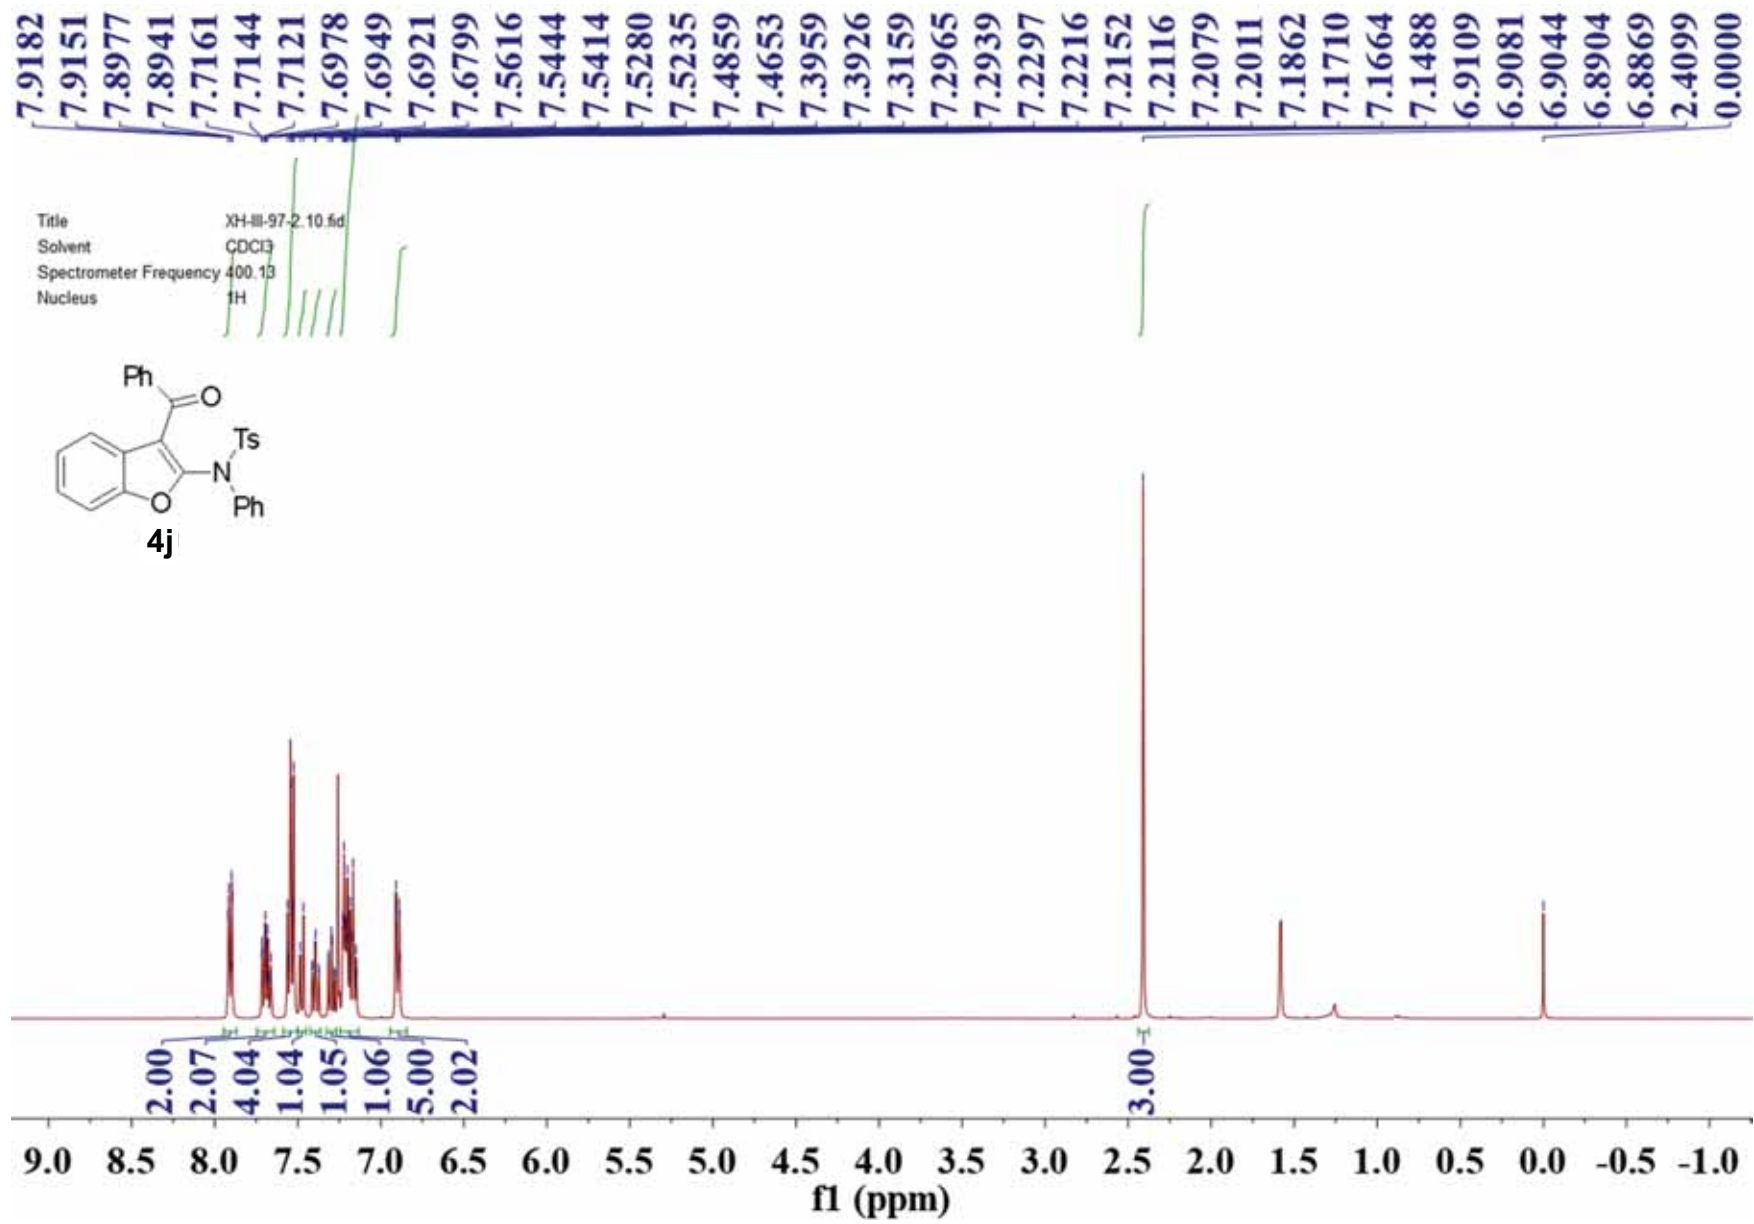

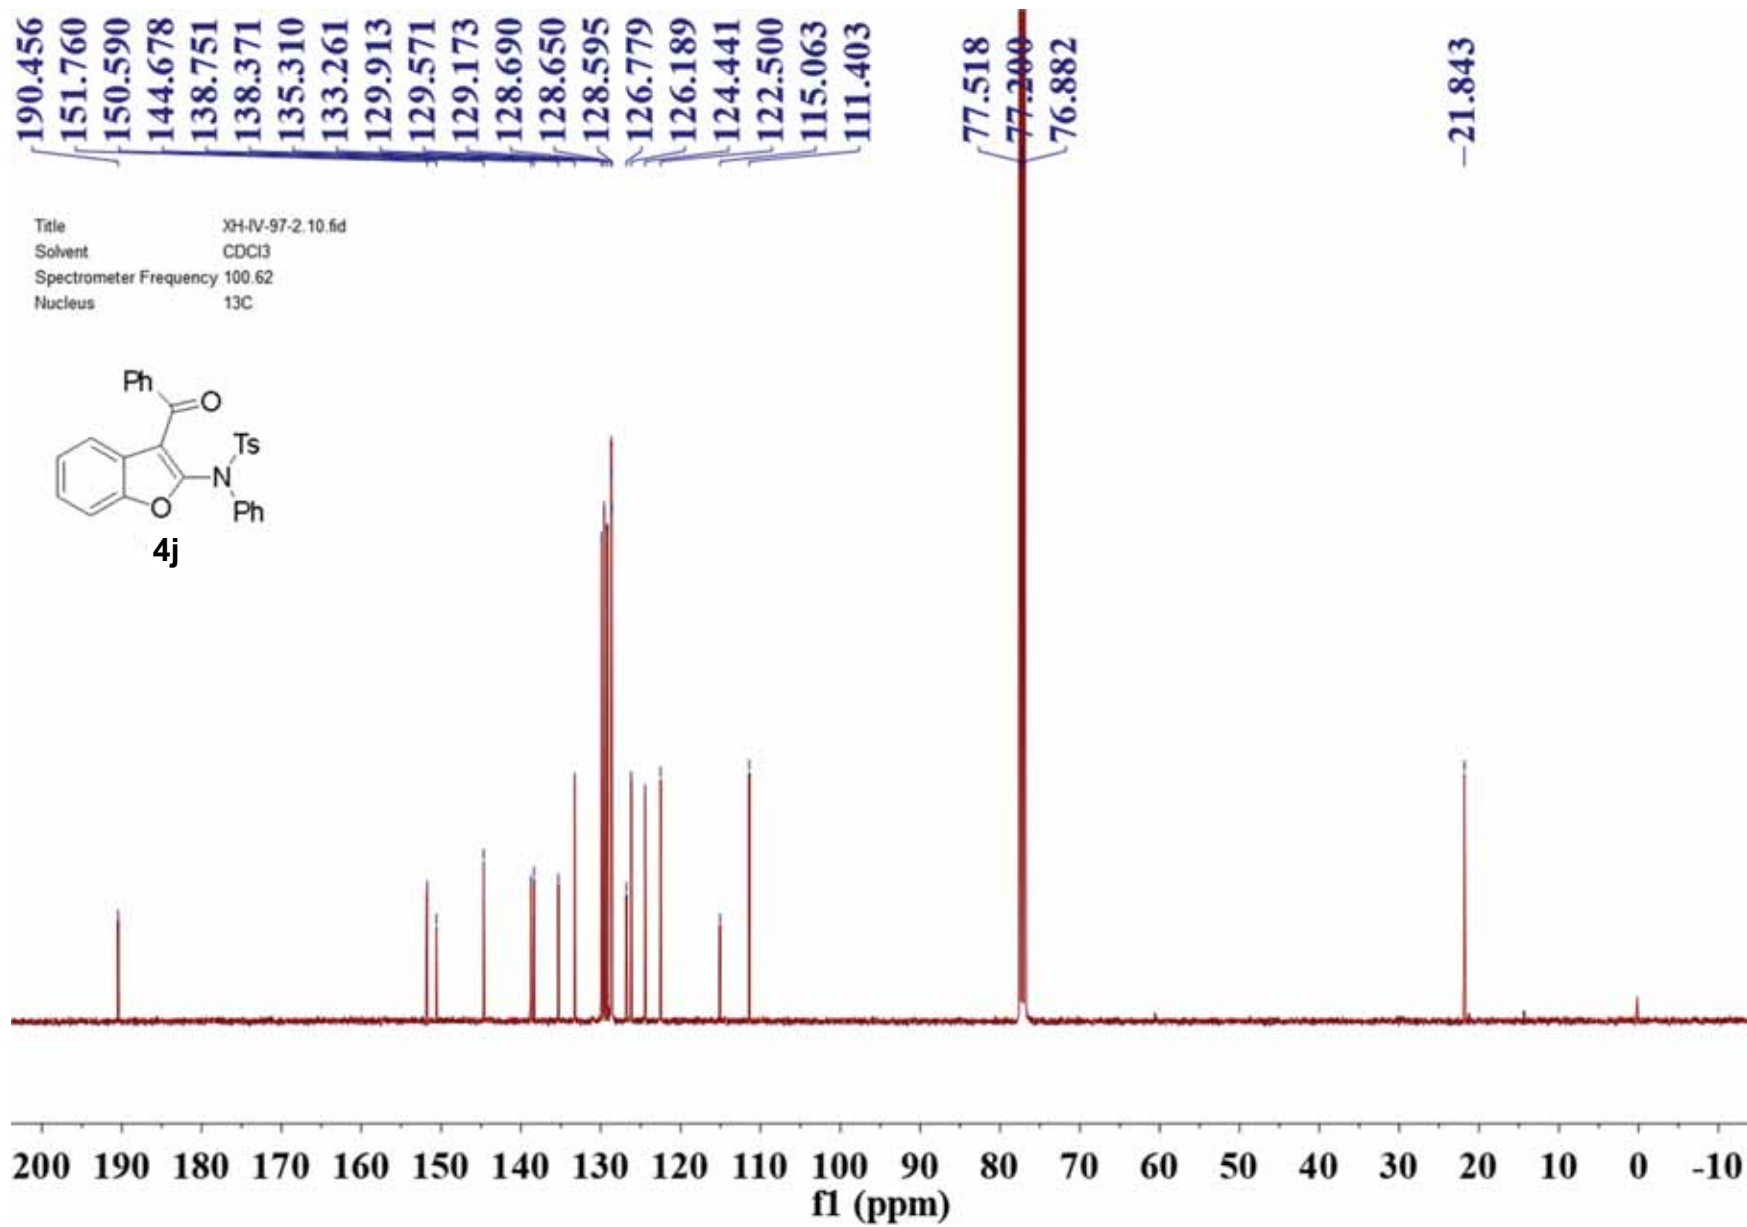

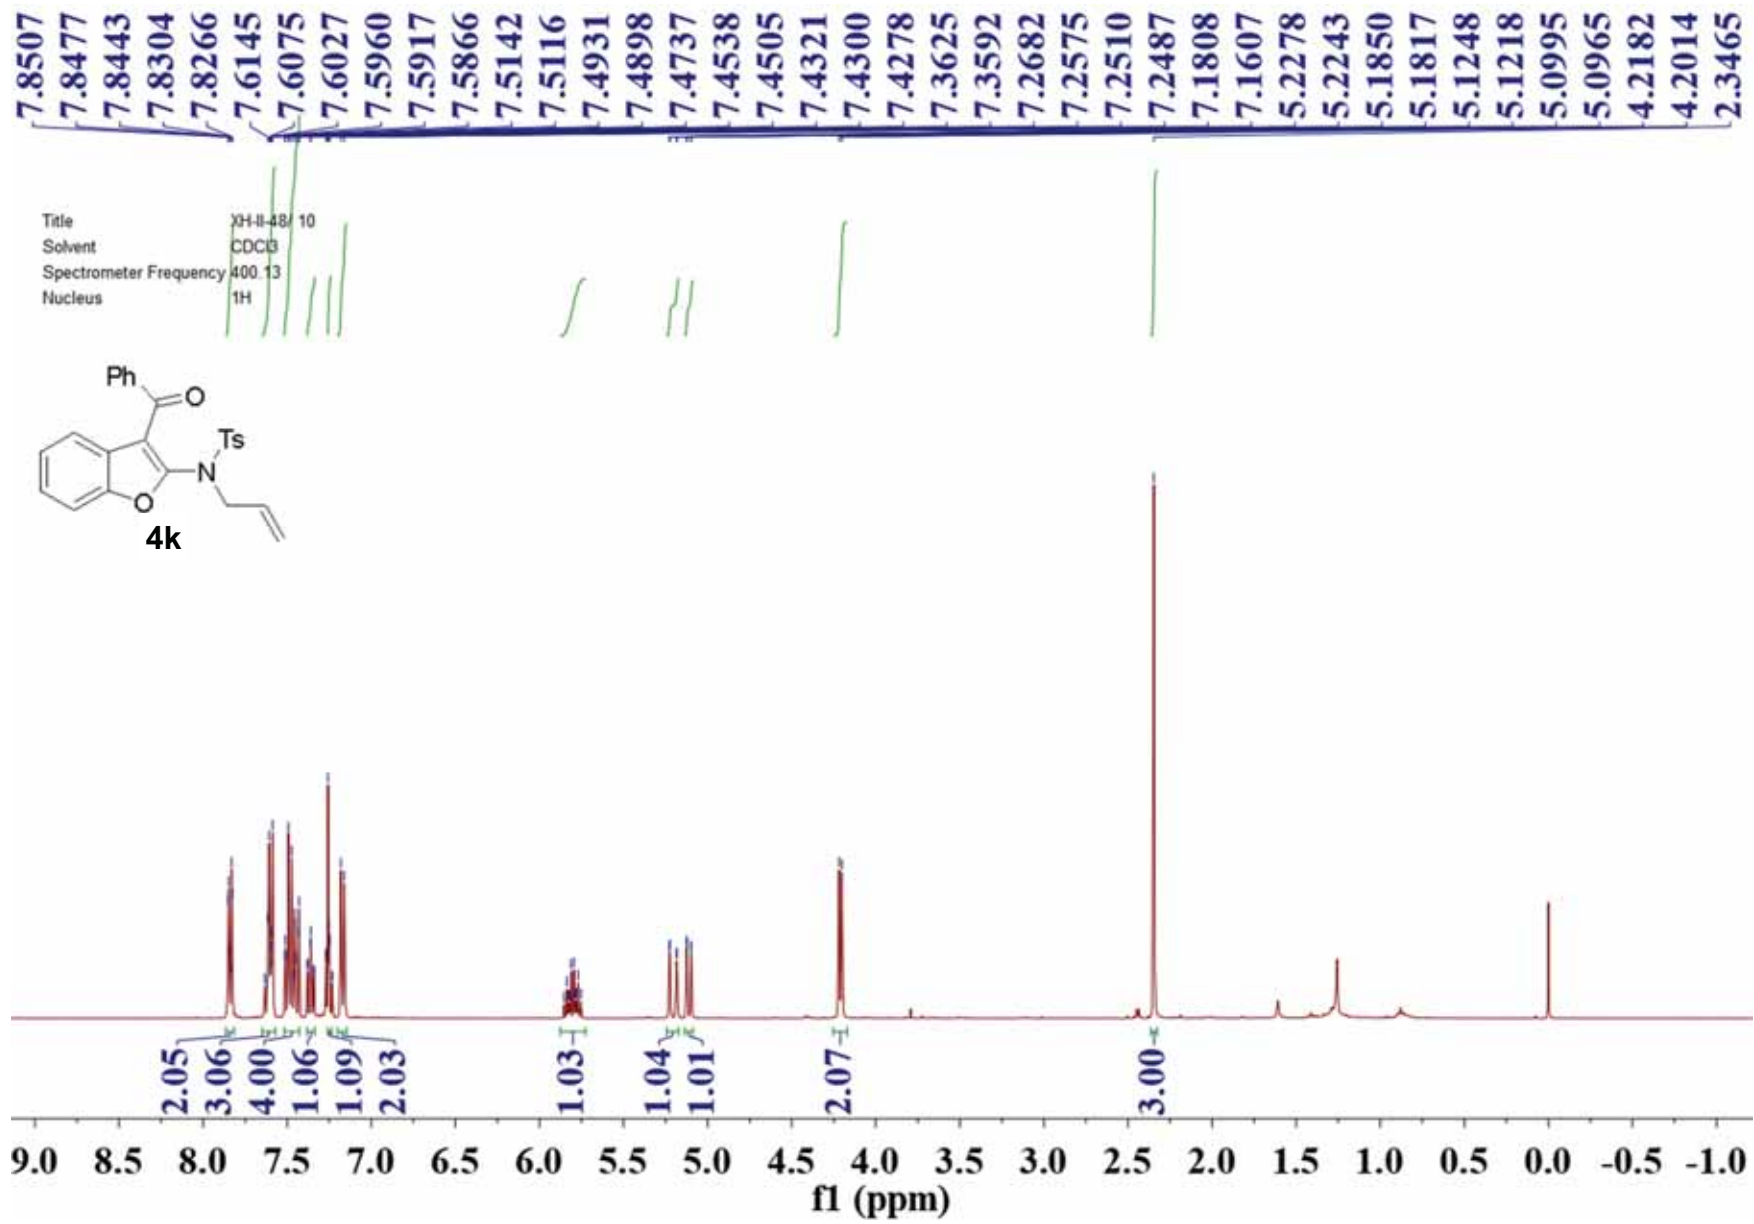

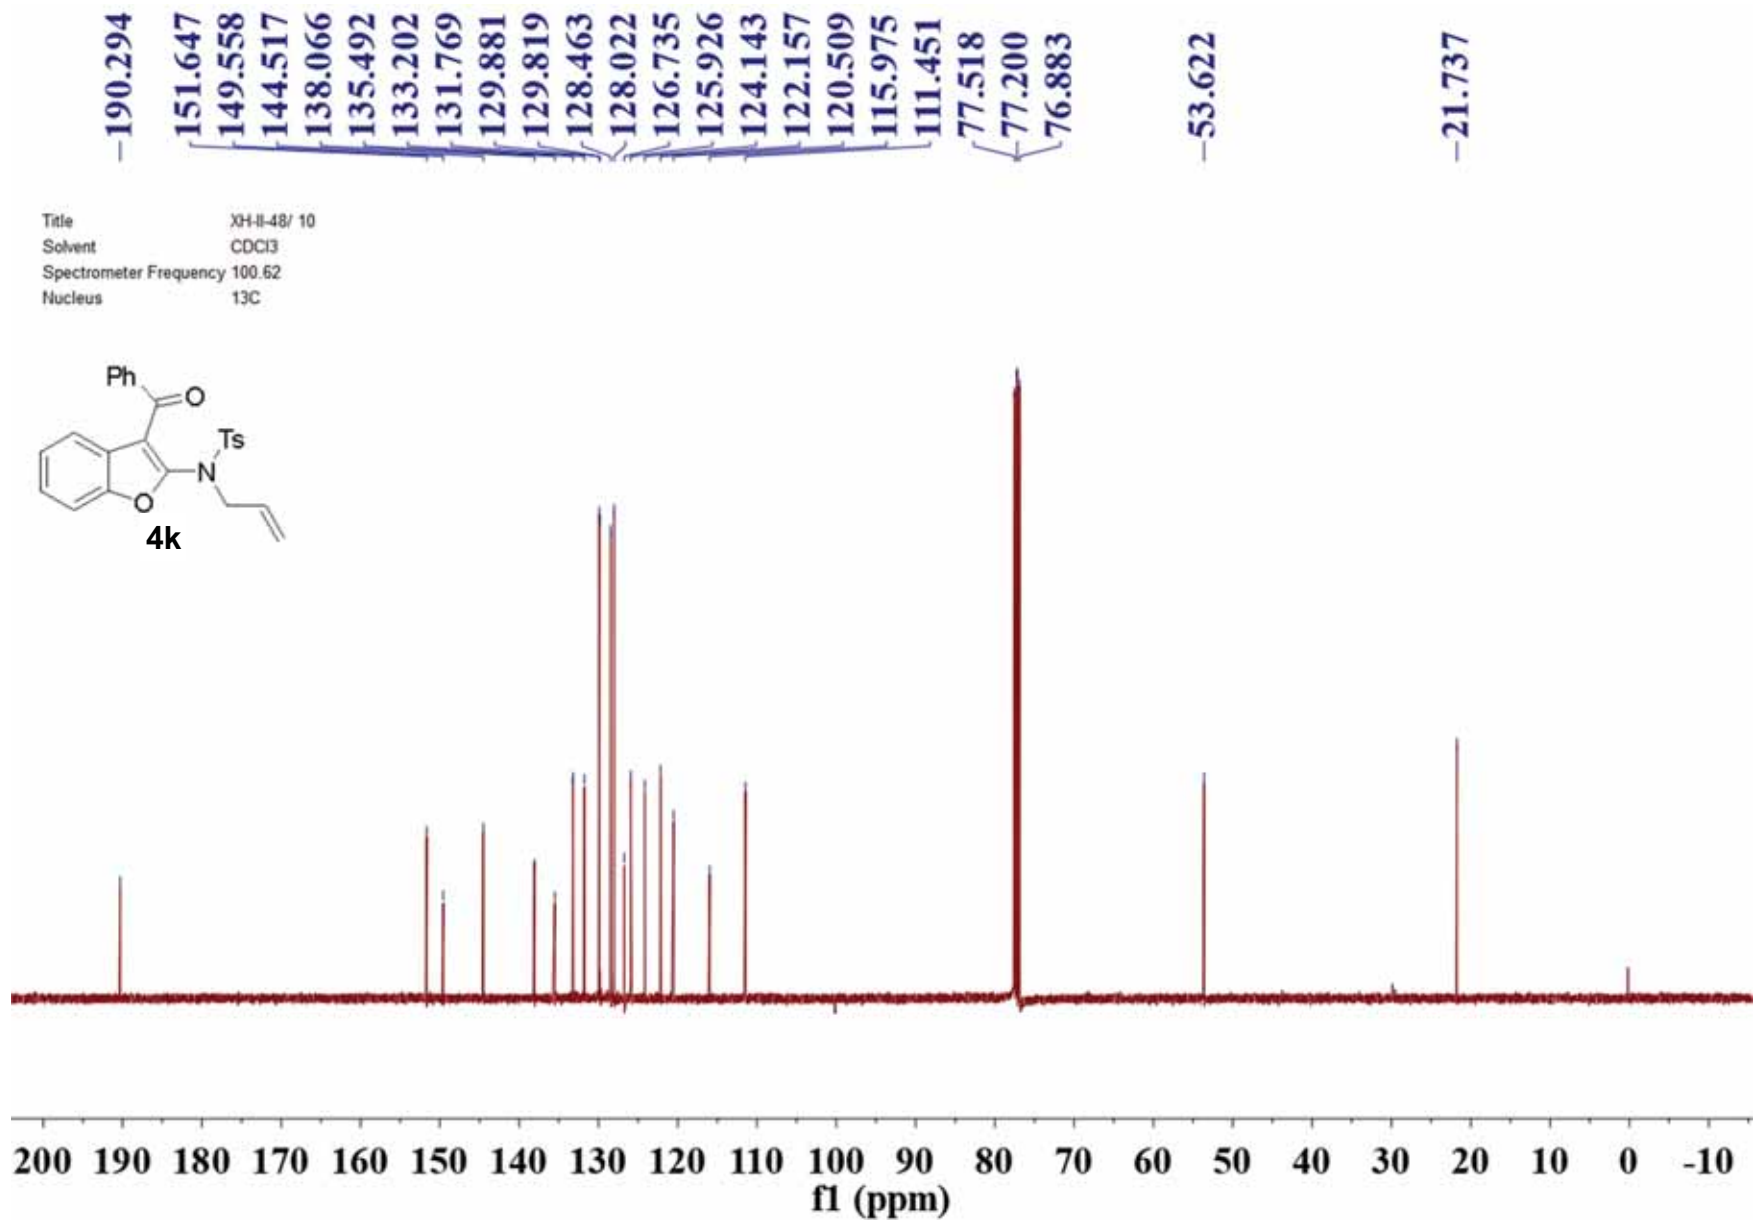

7.8681  
 7.8650  
 7.8613  
 7.8526  
 7.8477  
 7.8439  
 7.5922  
 7.5769  
 7.5736  
 7.5556  
 7.5523  
 7.5362  
 7.5329  
 7.4964  
 7.4917  
 7.4888  
 7.4799  
 7.4767  
 7.4713  
 7.4684  
 7.4623  
 7.4581  
 7.3627  
 7.3591  
 7.3439  
 7.3410  
 7.3238  
 7.3202  
 7.2845  
 7.2817  
 7.2653  
 7.2622  
 7.2465  
 4.3984  
 4.3800  
 4.3590  
 4.1378  
 4.1169  
 4.0984  
 0.0000

Title XH-III-75.10.fid  
 Solvent CDCl3  
 Spectrometer Frequency 400.13  
 Nucleus 1H

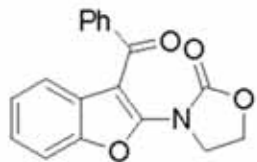

4l

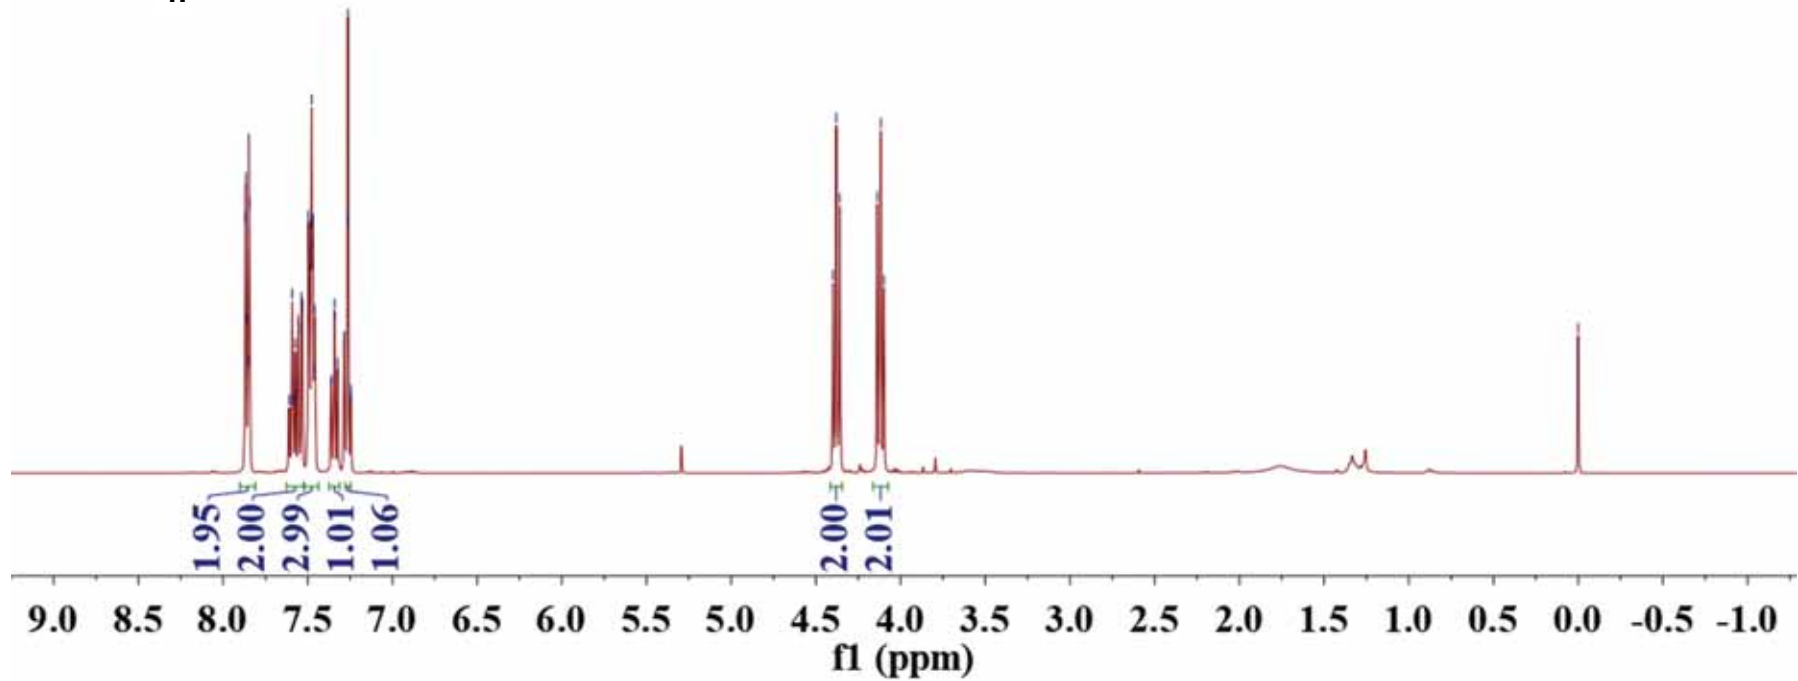

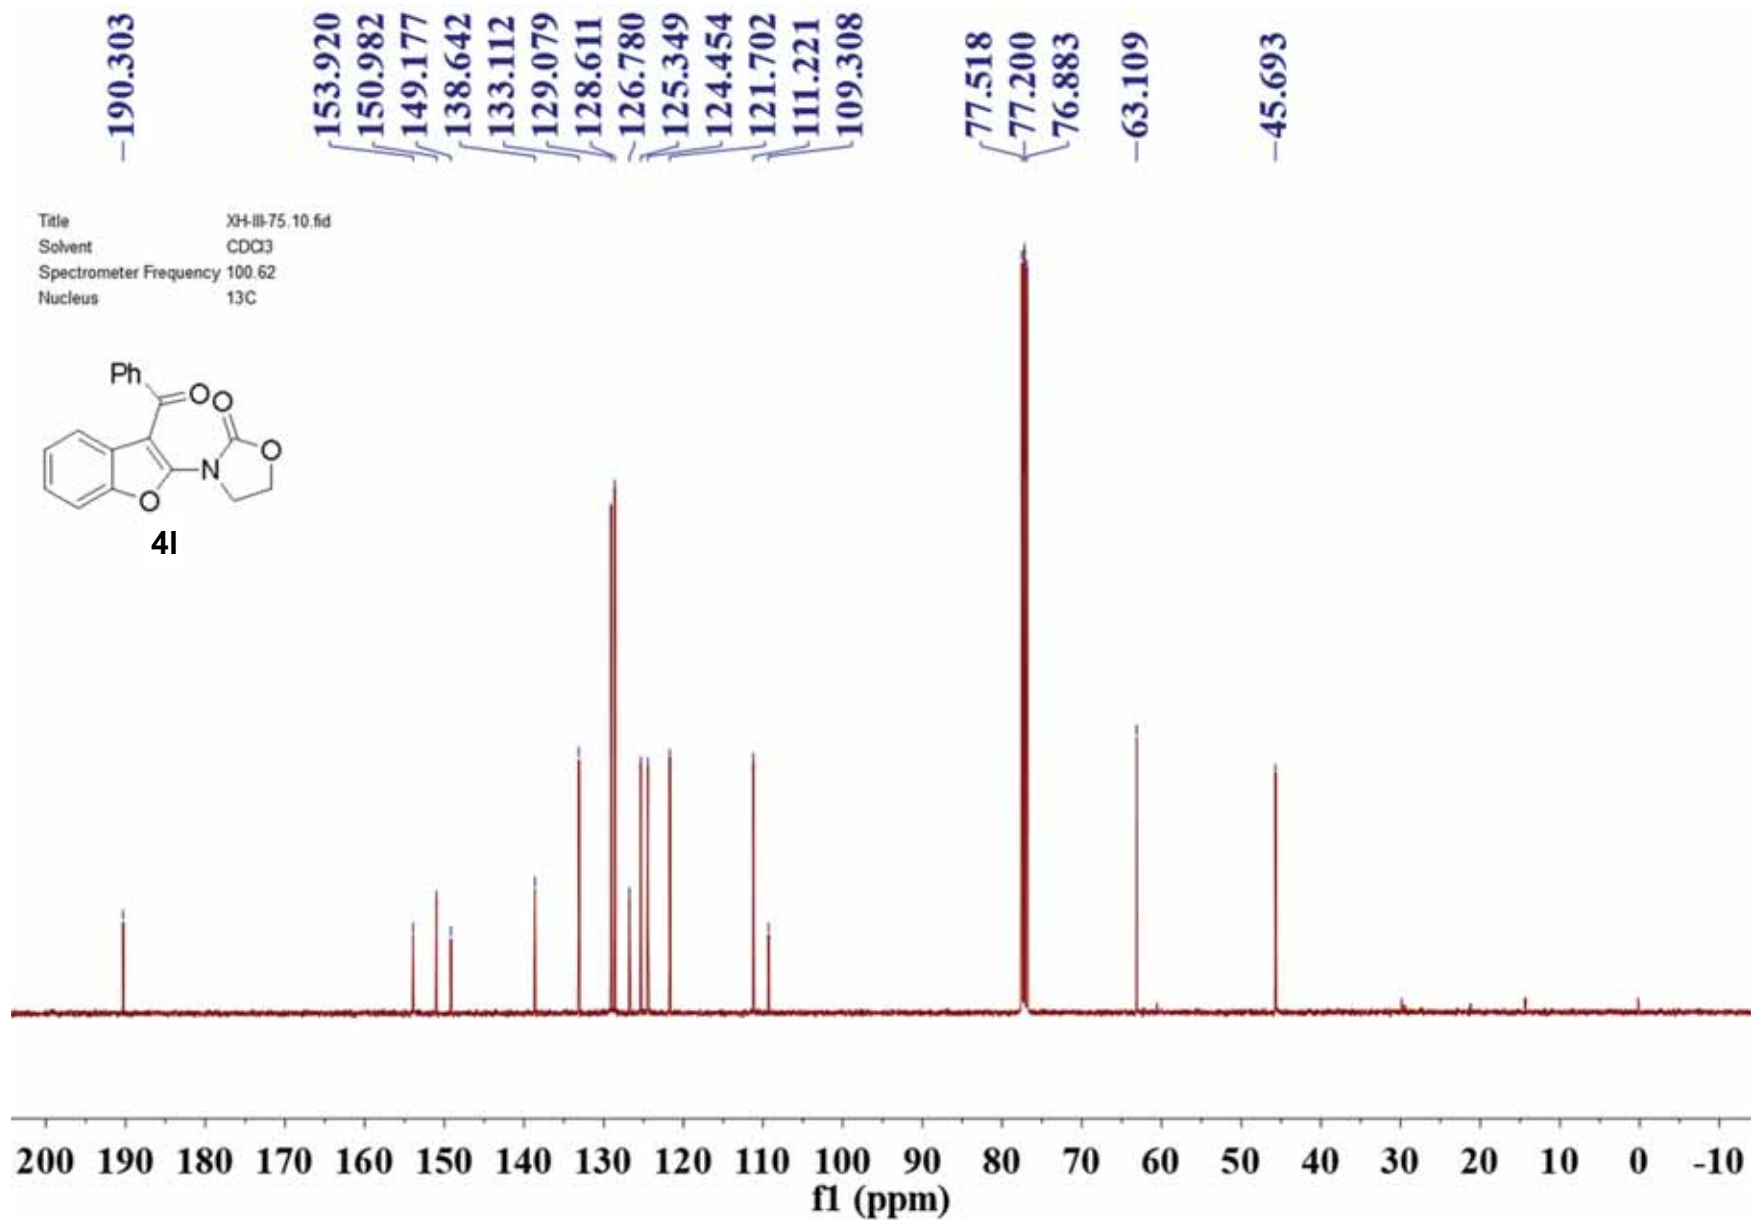

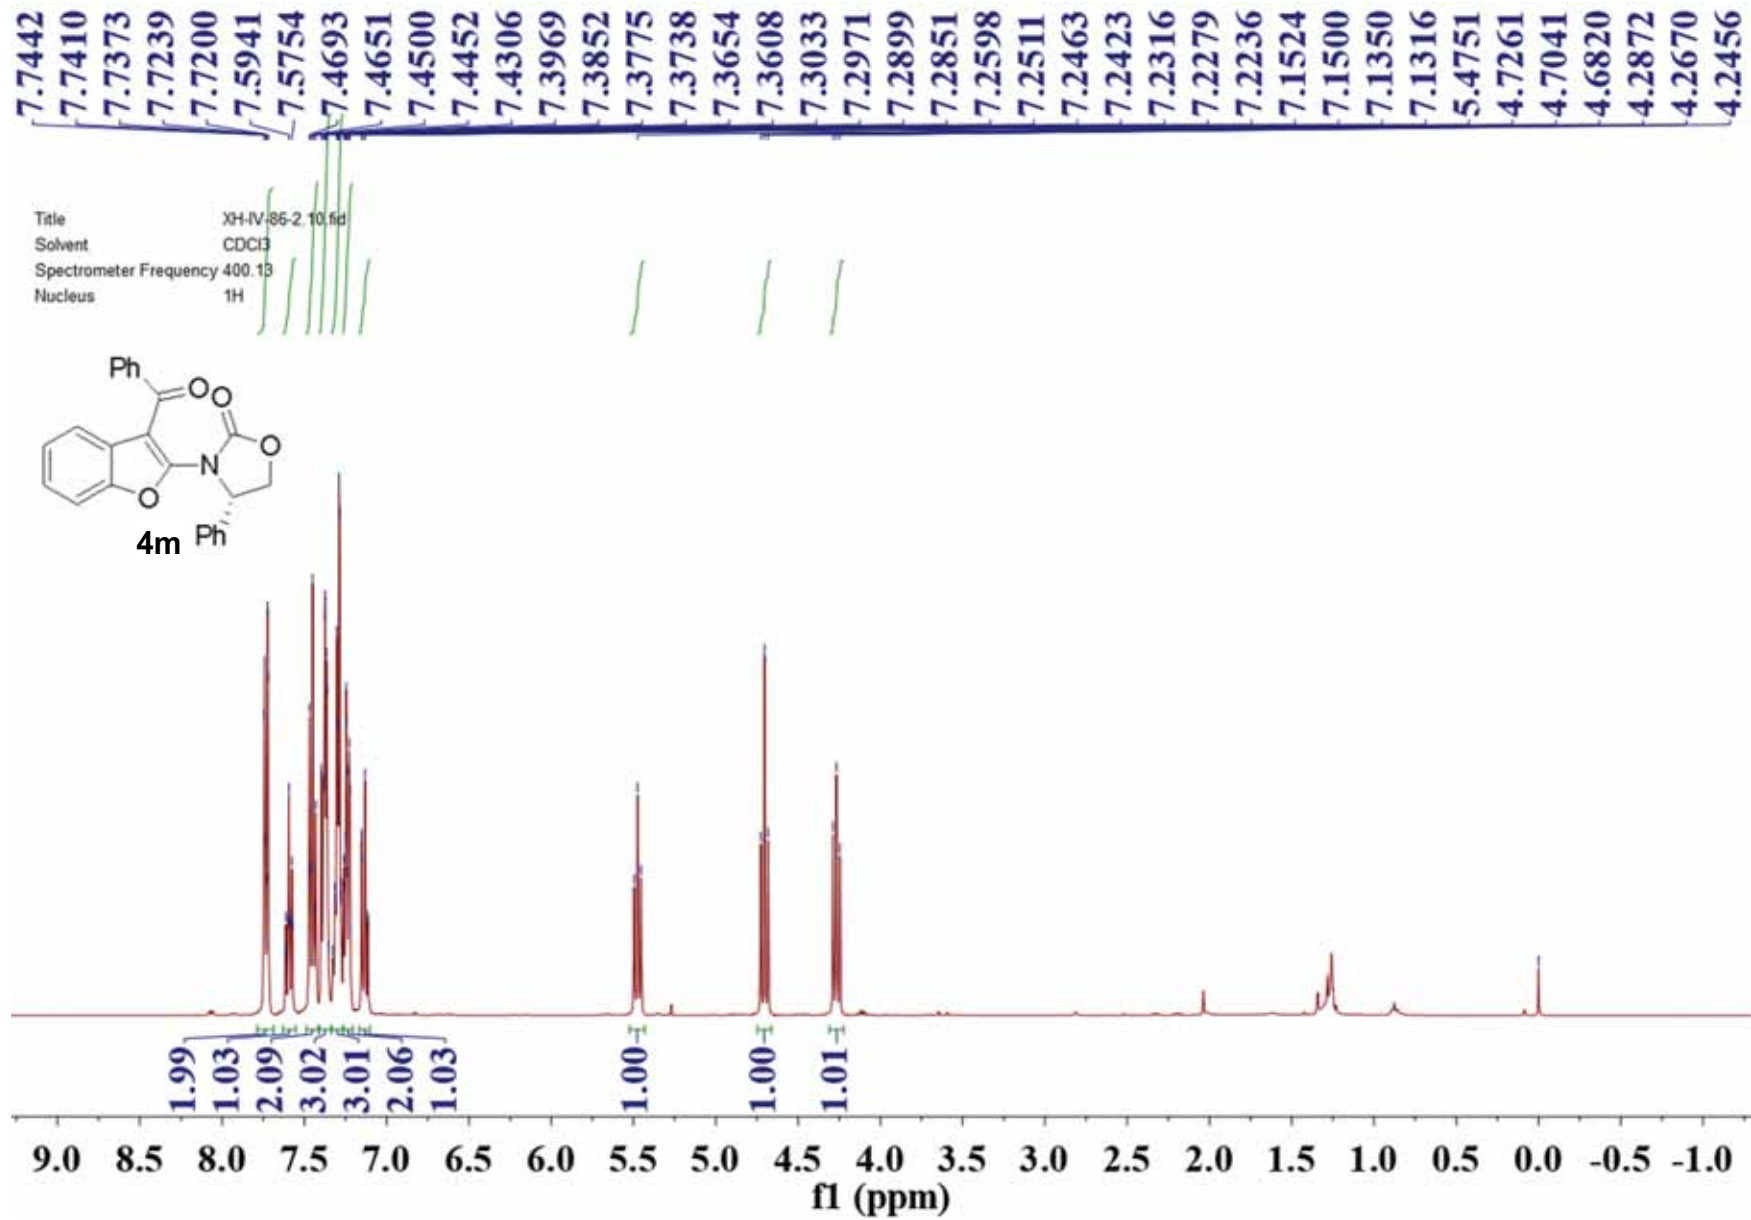

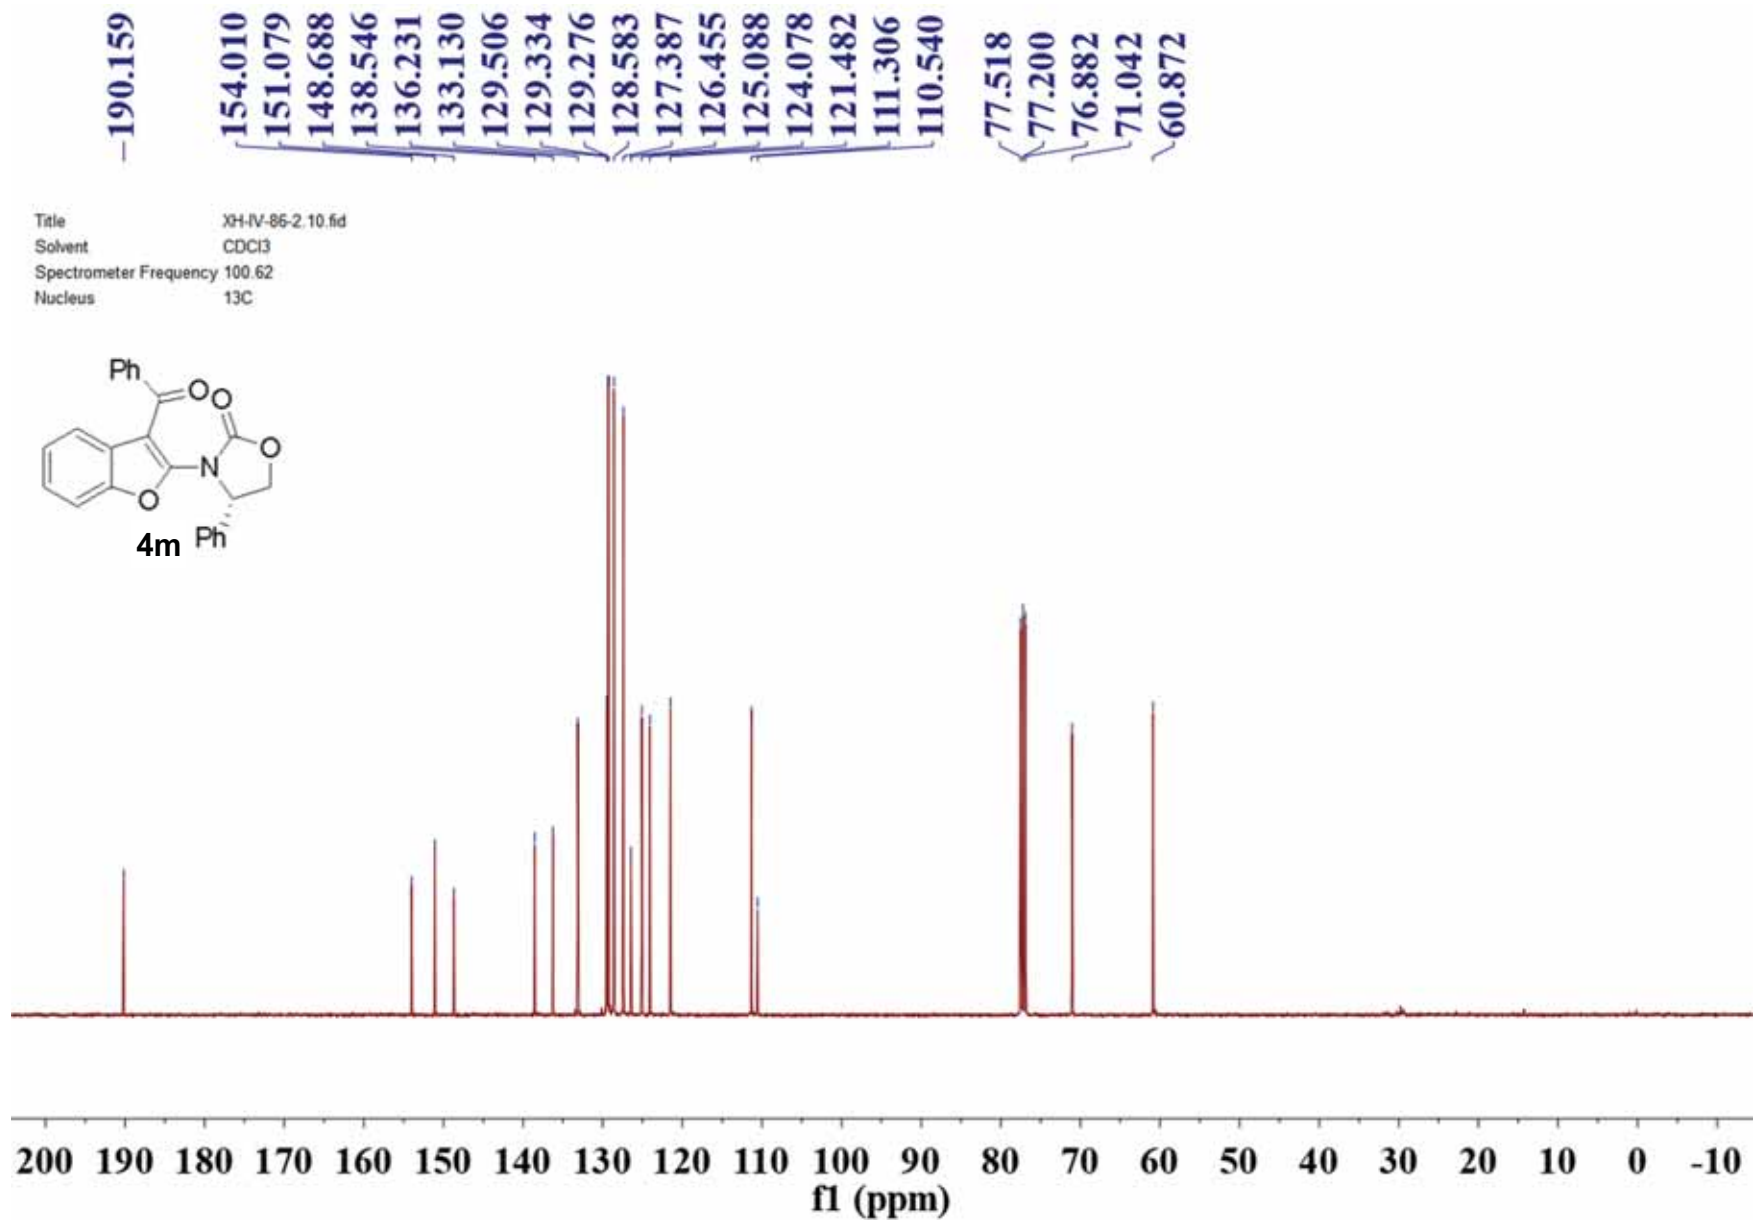



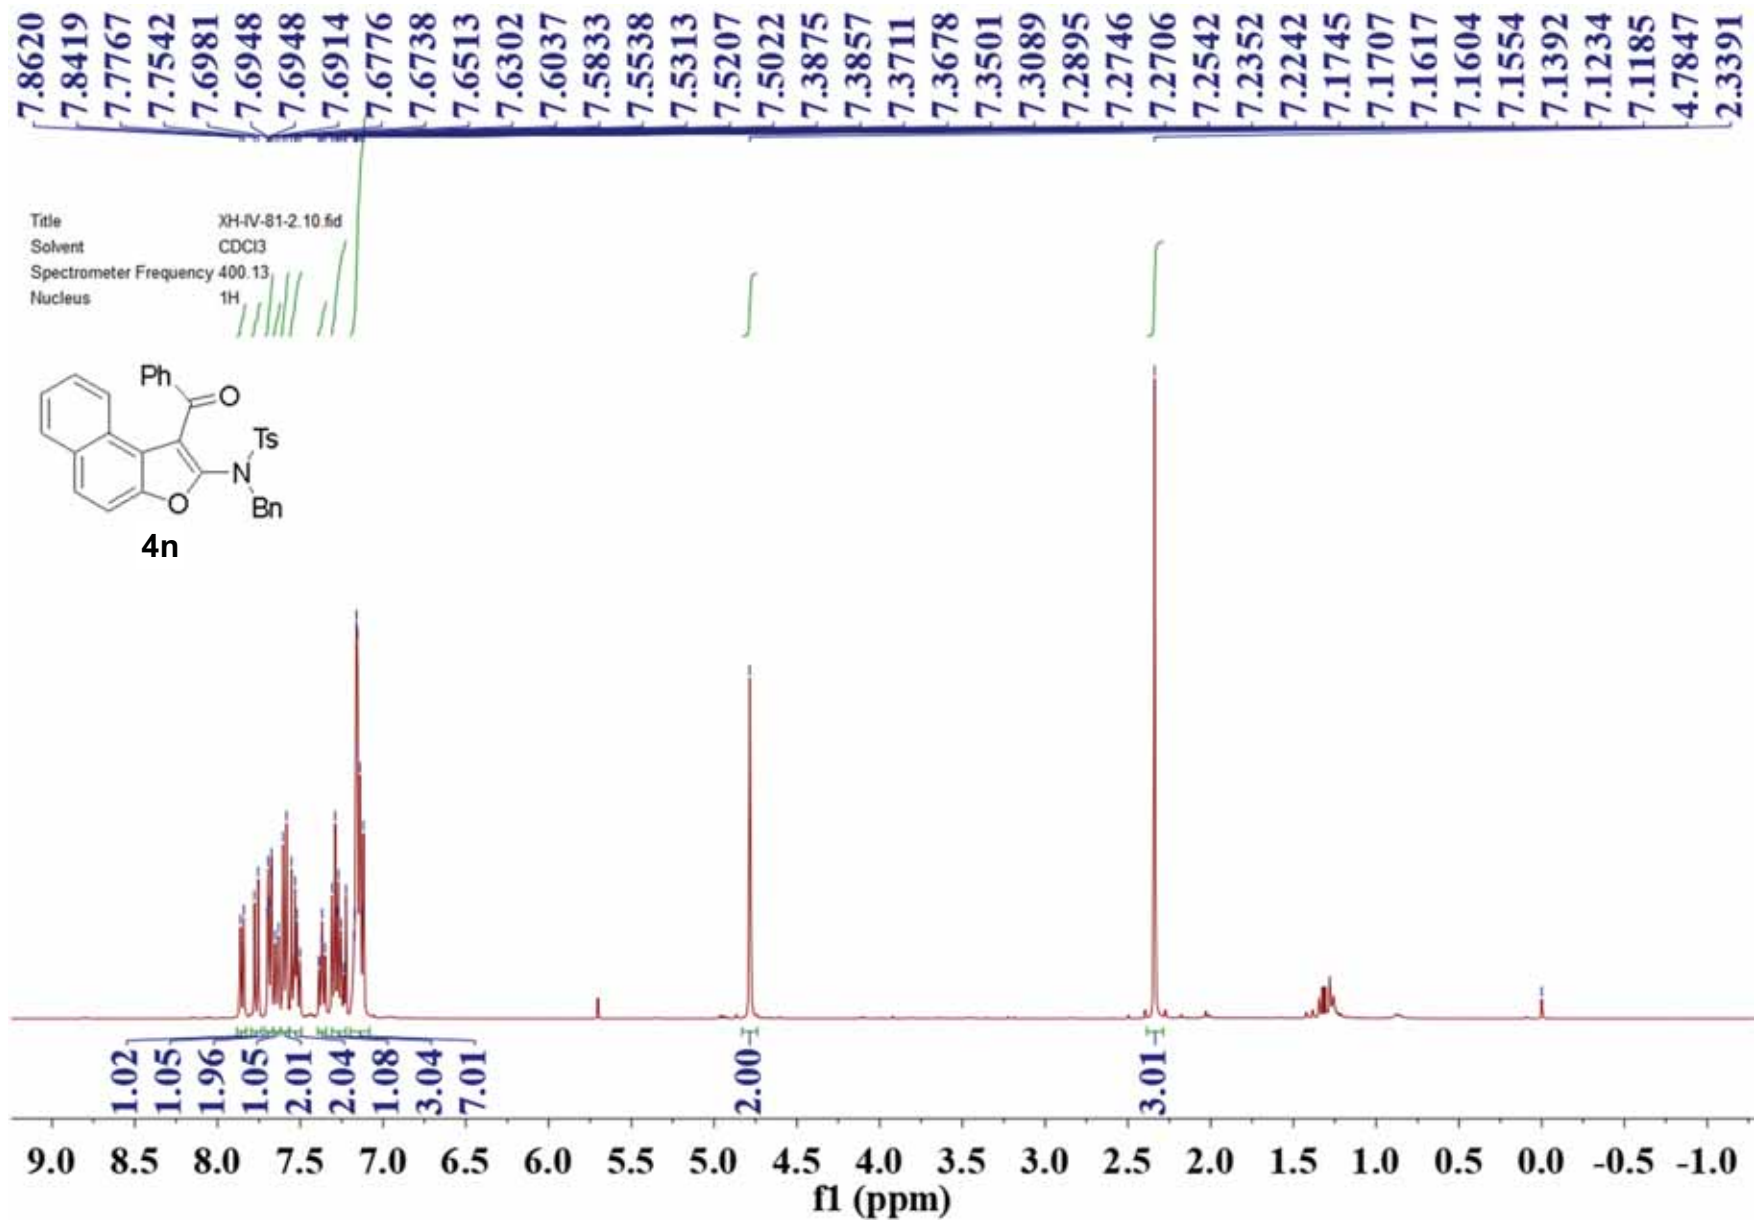

191.423  
149.539  
146.167  
144.431  
137.492  
135.489  
134.491  
133.540  
131.012  
130.003  
129.792  
129.416  
129.082  
128.640  
128.586  
128.301  
128.038  
127.751  
127.219  
126.774  
125.064  
124.710  
121.062  
118.662  
111.952  
77.518  
77.200  
76.883  
55.097

-21.723

Title XH-IV-81-2.10.fid  
Solvent CDCl3  
Spectrometer Frequency 100.62  
Nucleus 13C

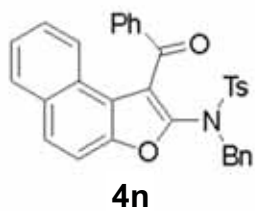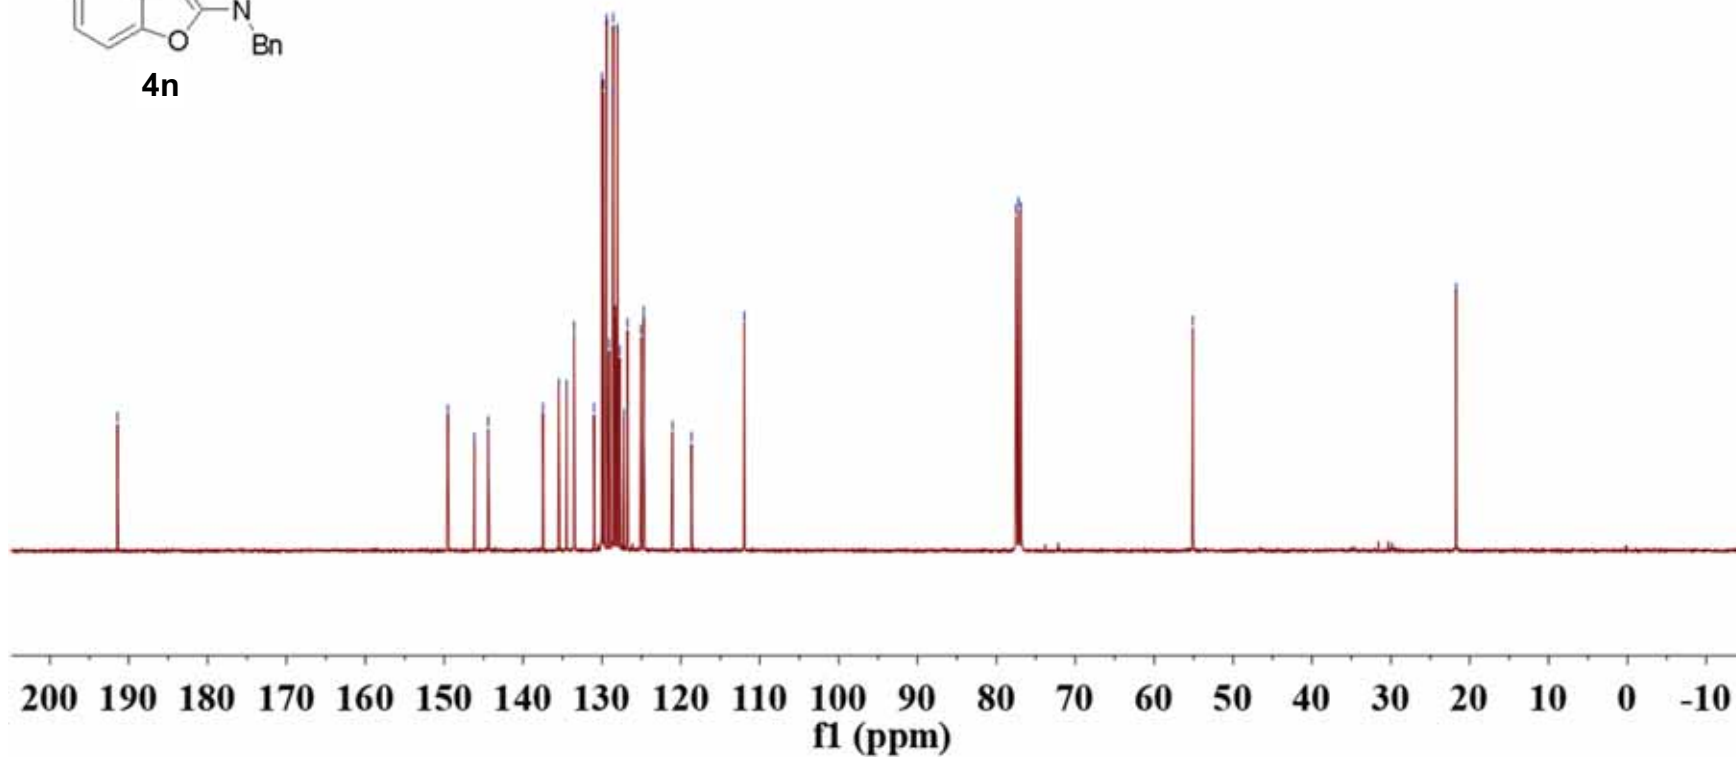

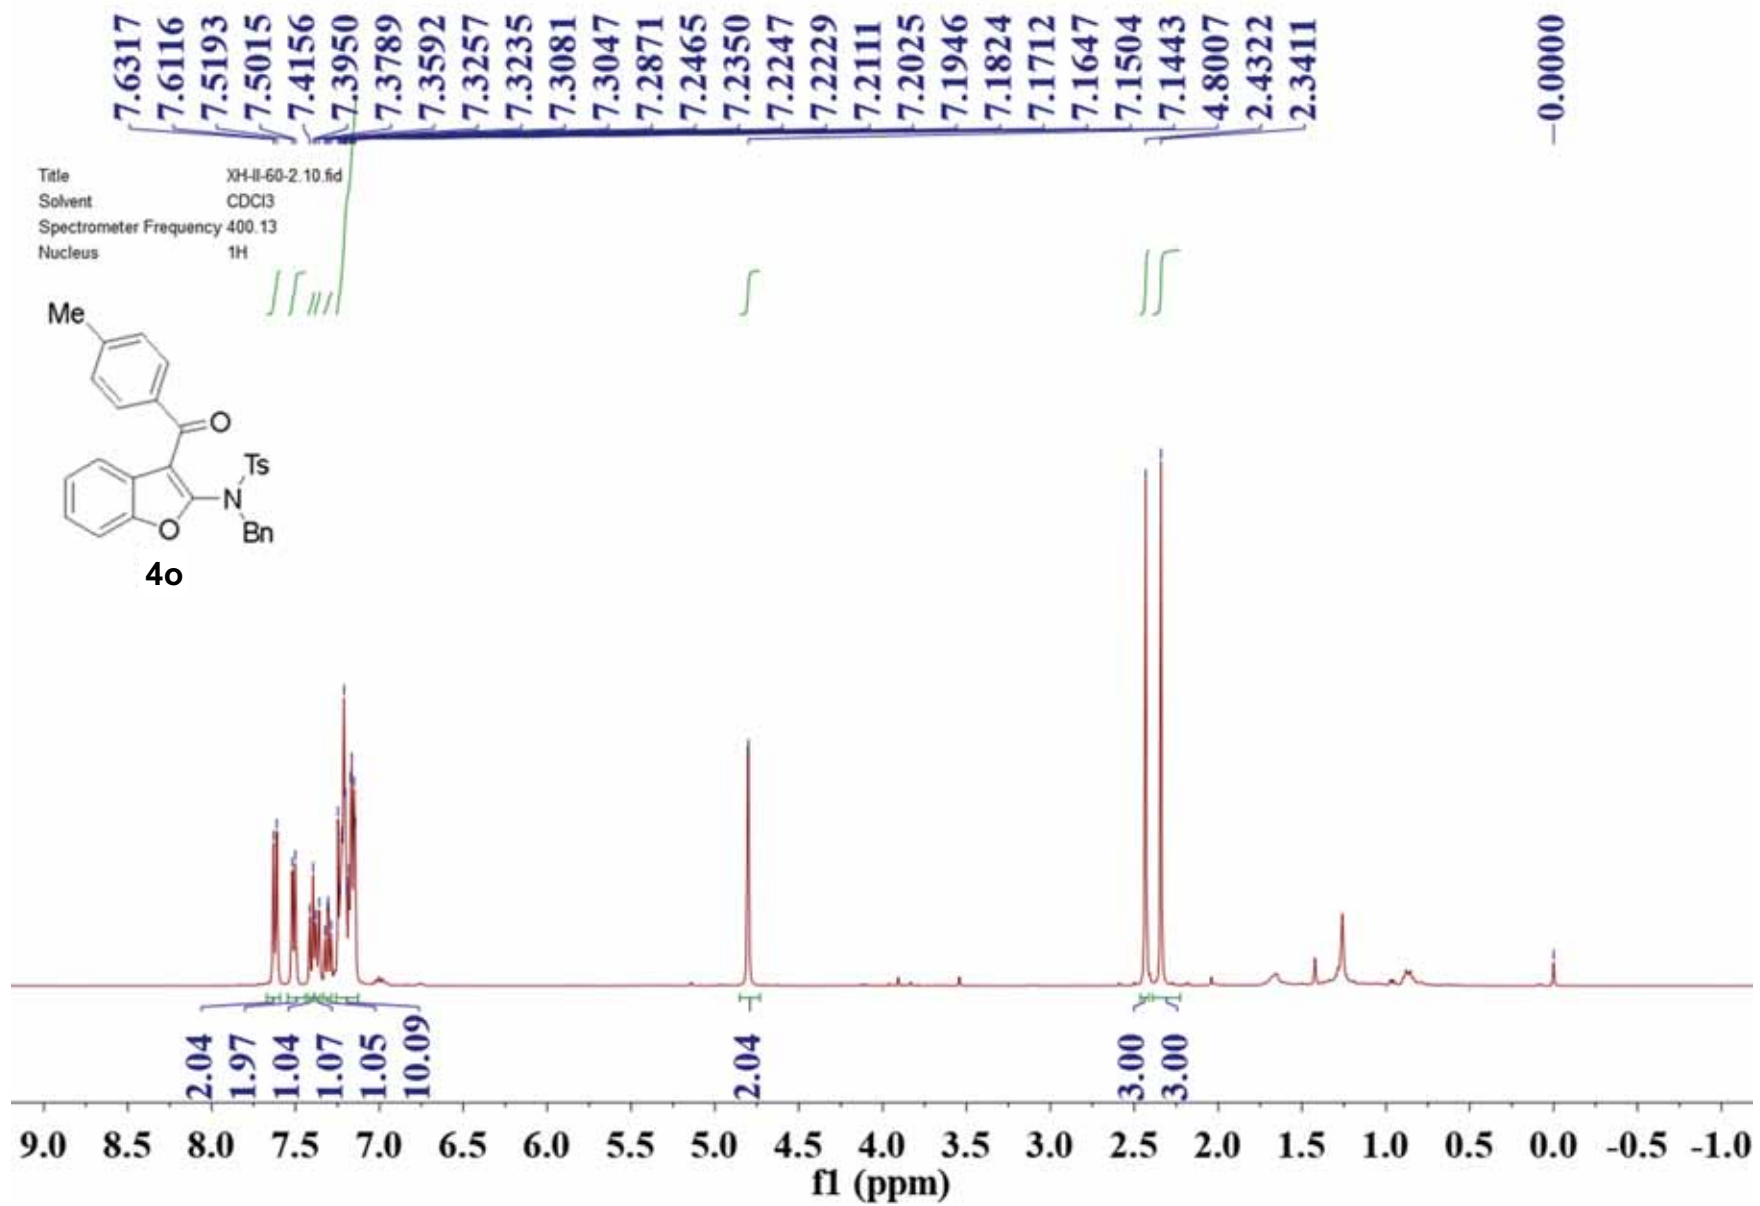

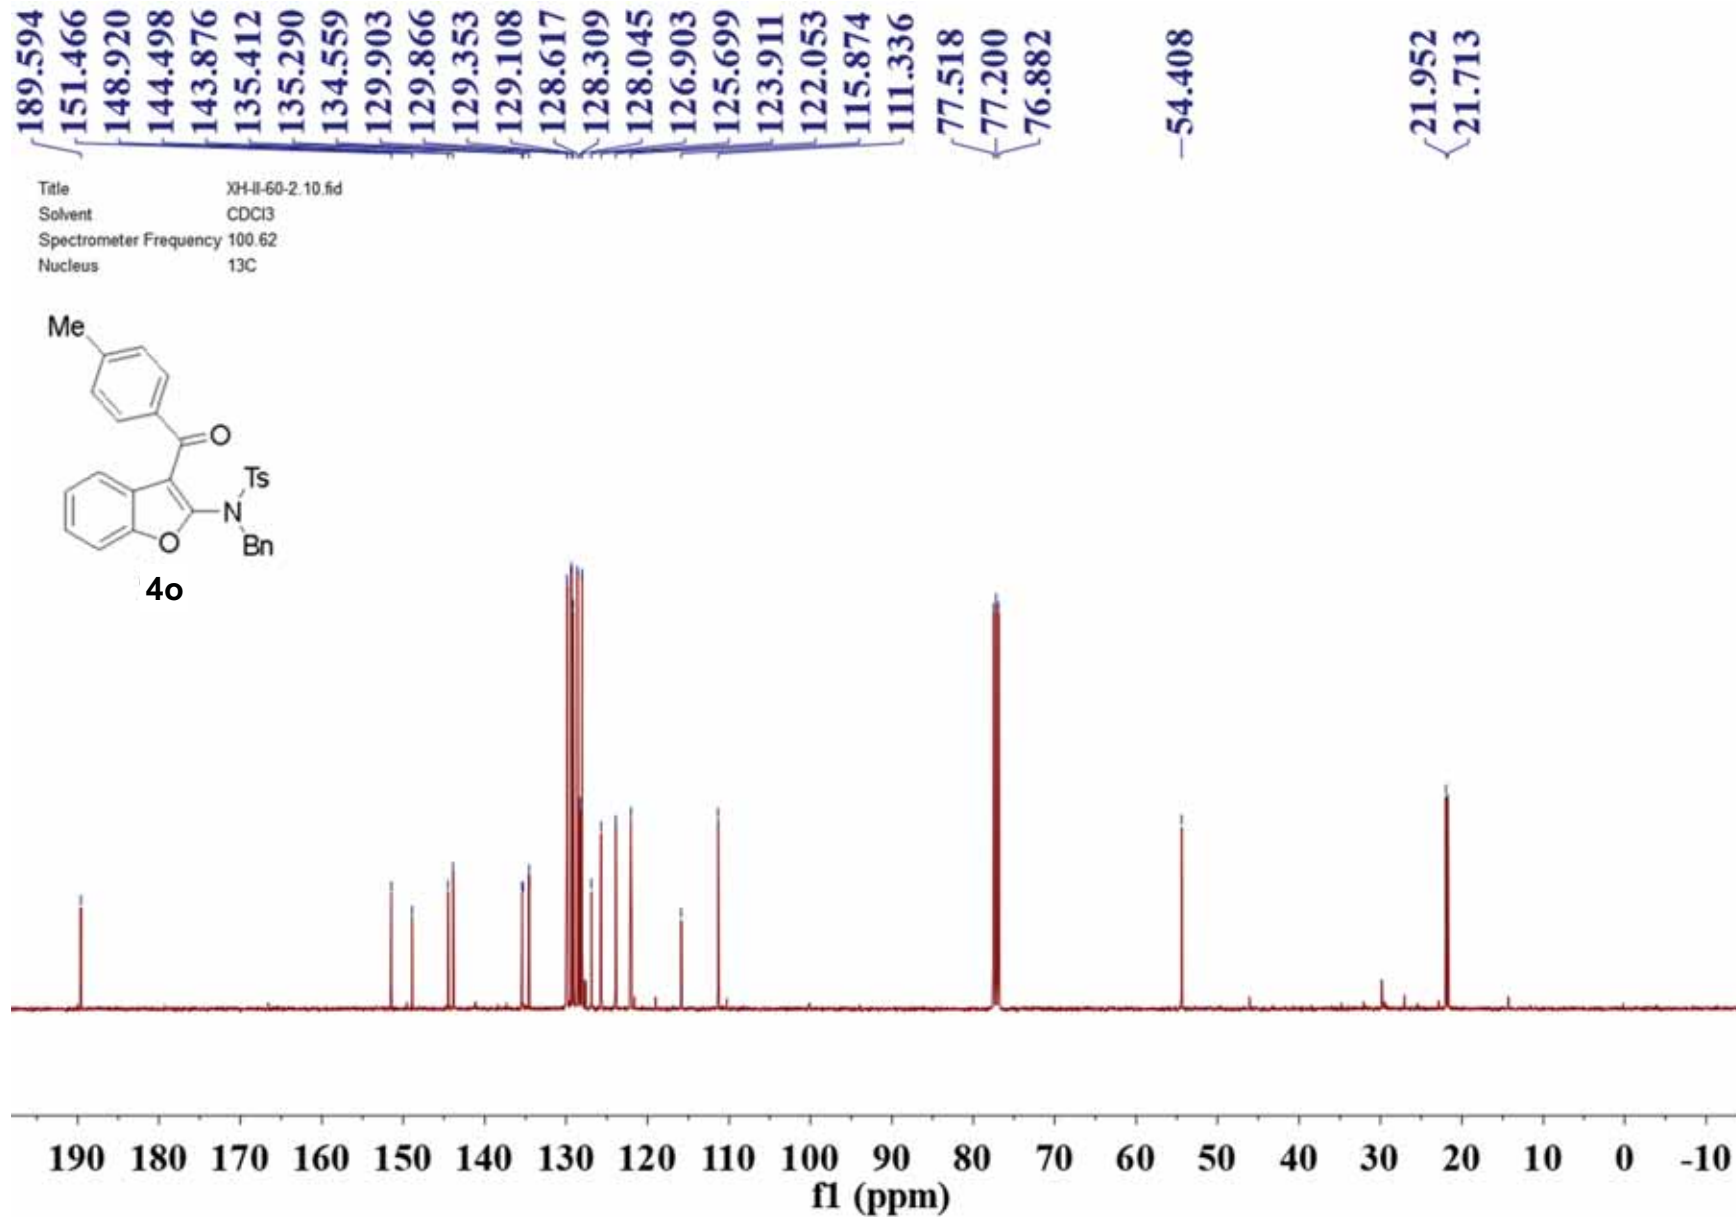

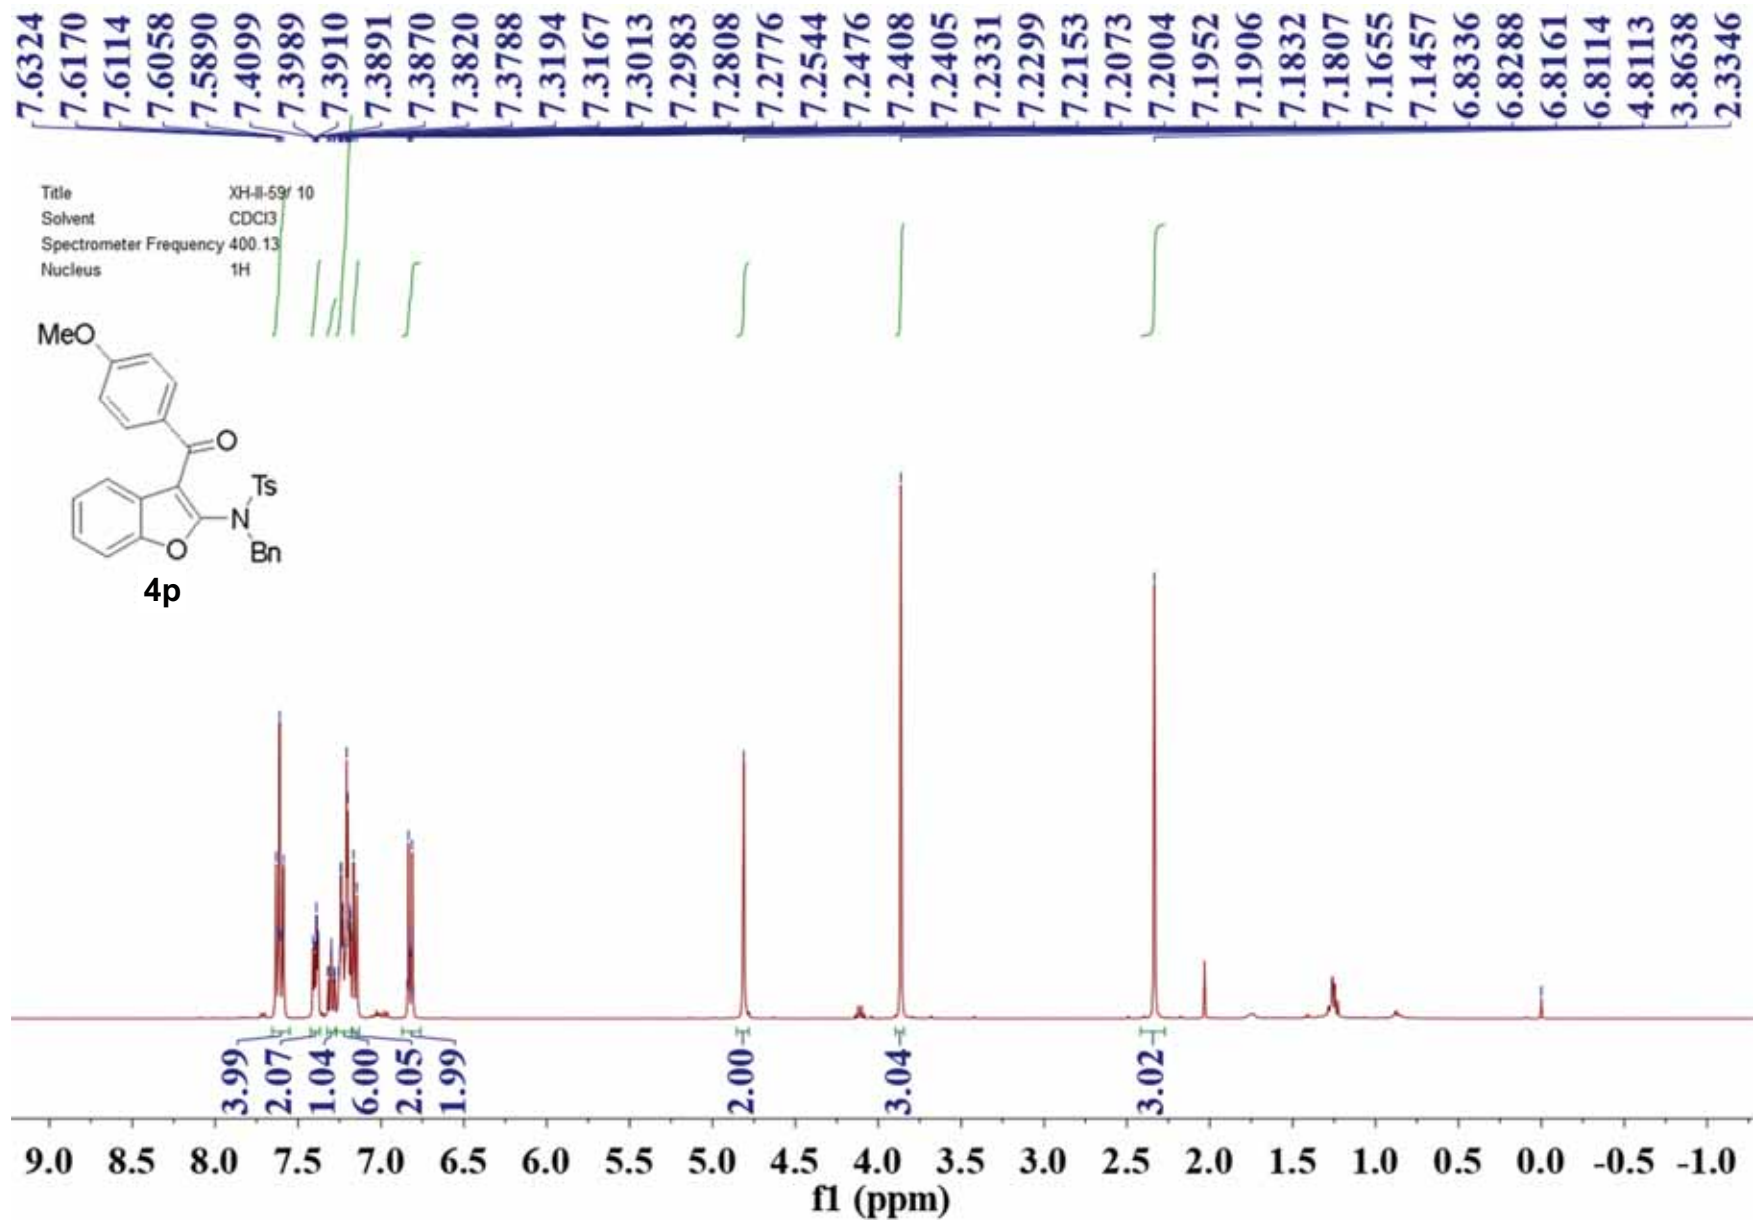

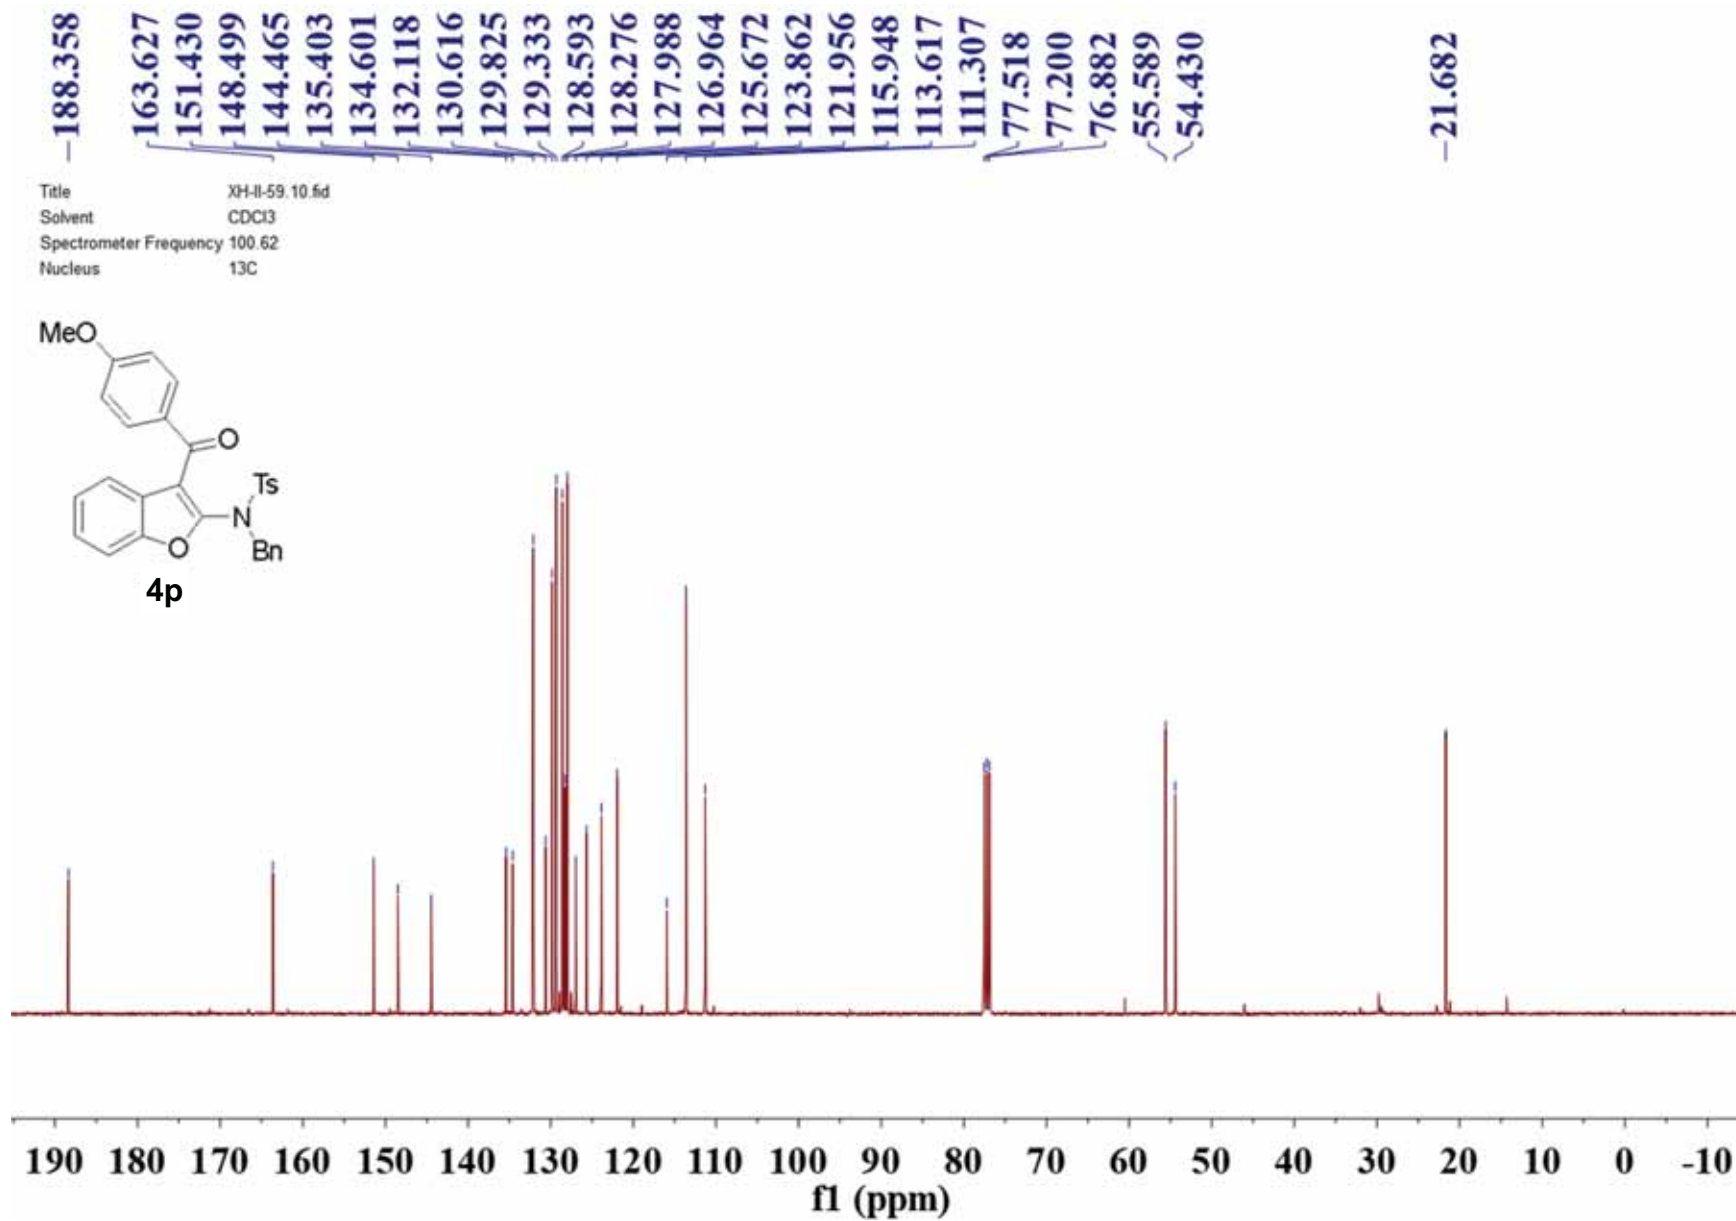

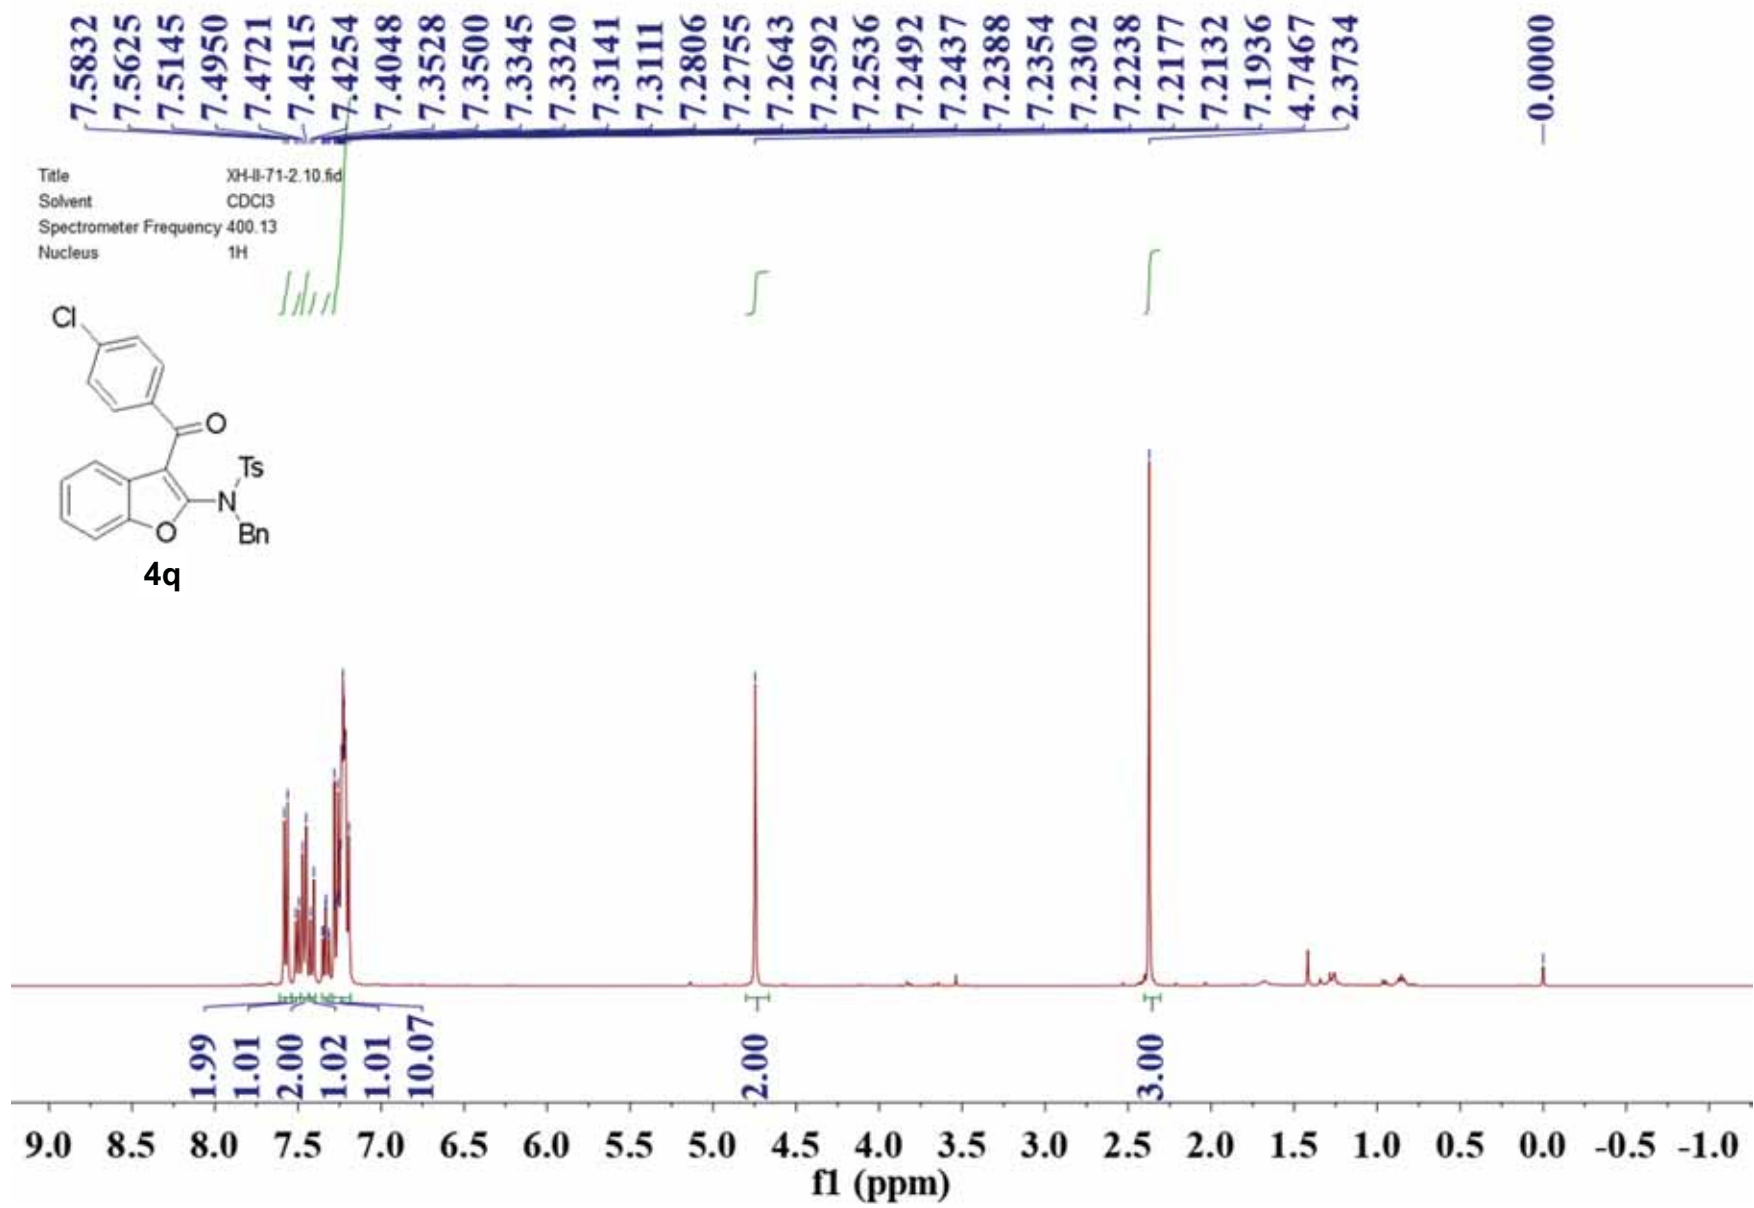

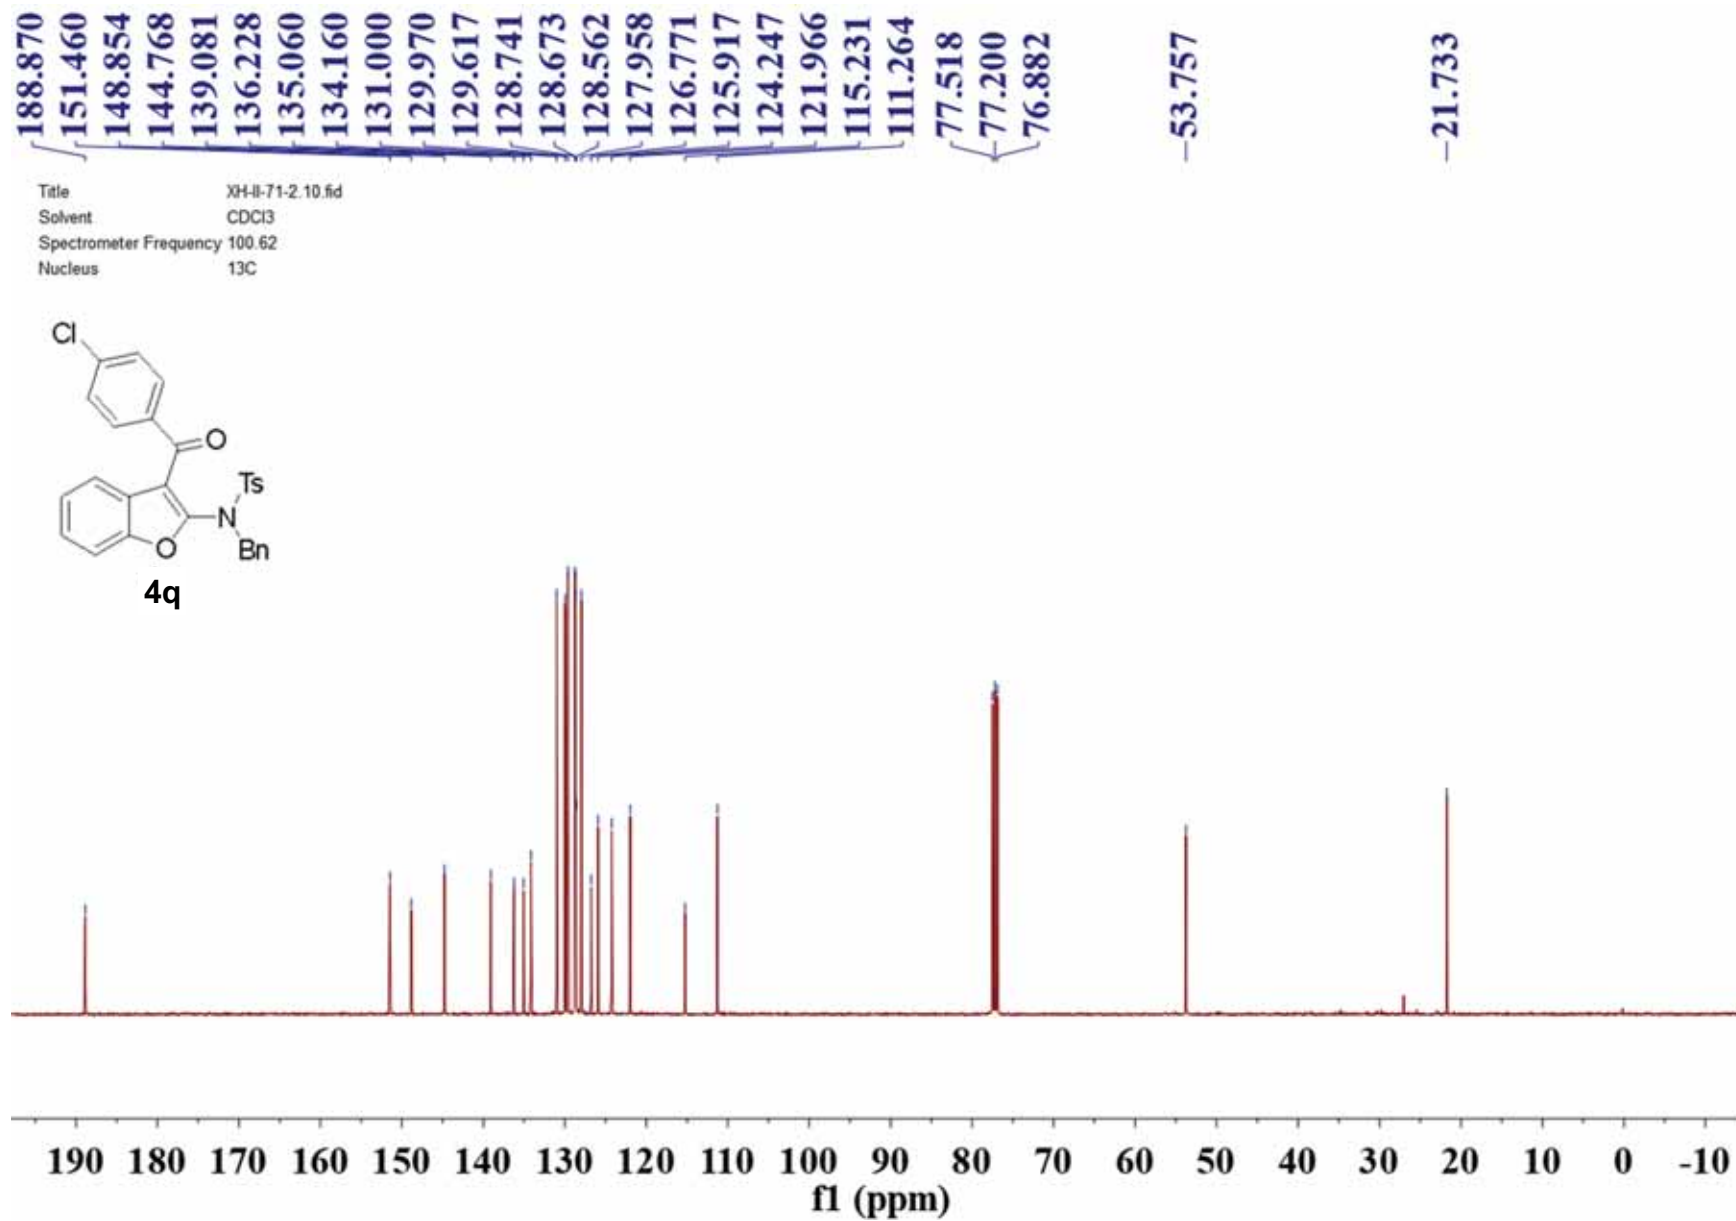



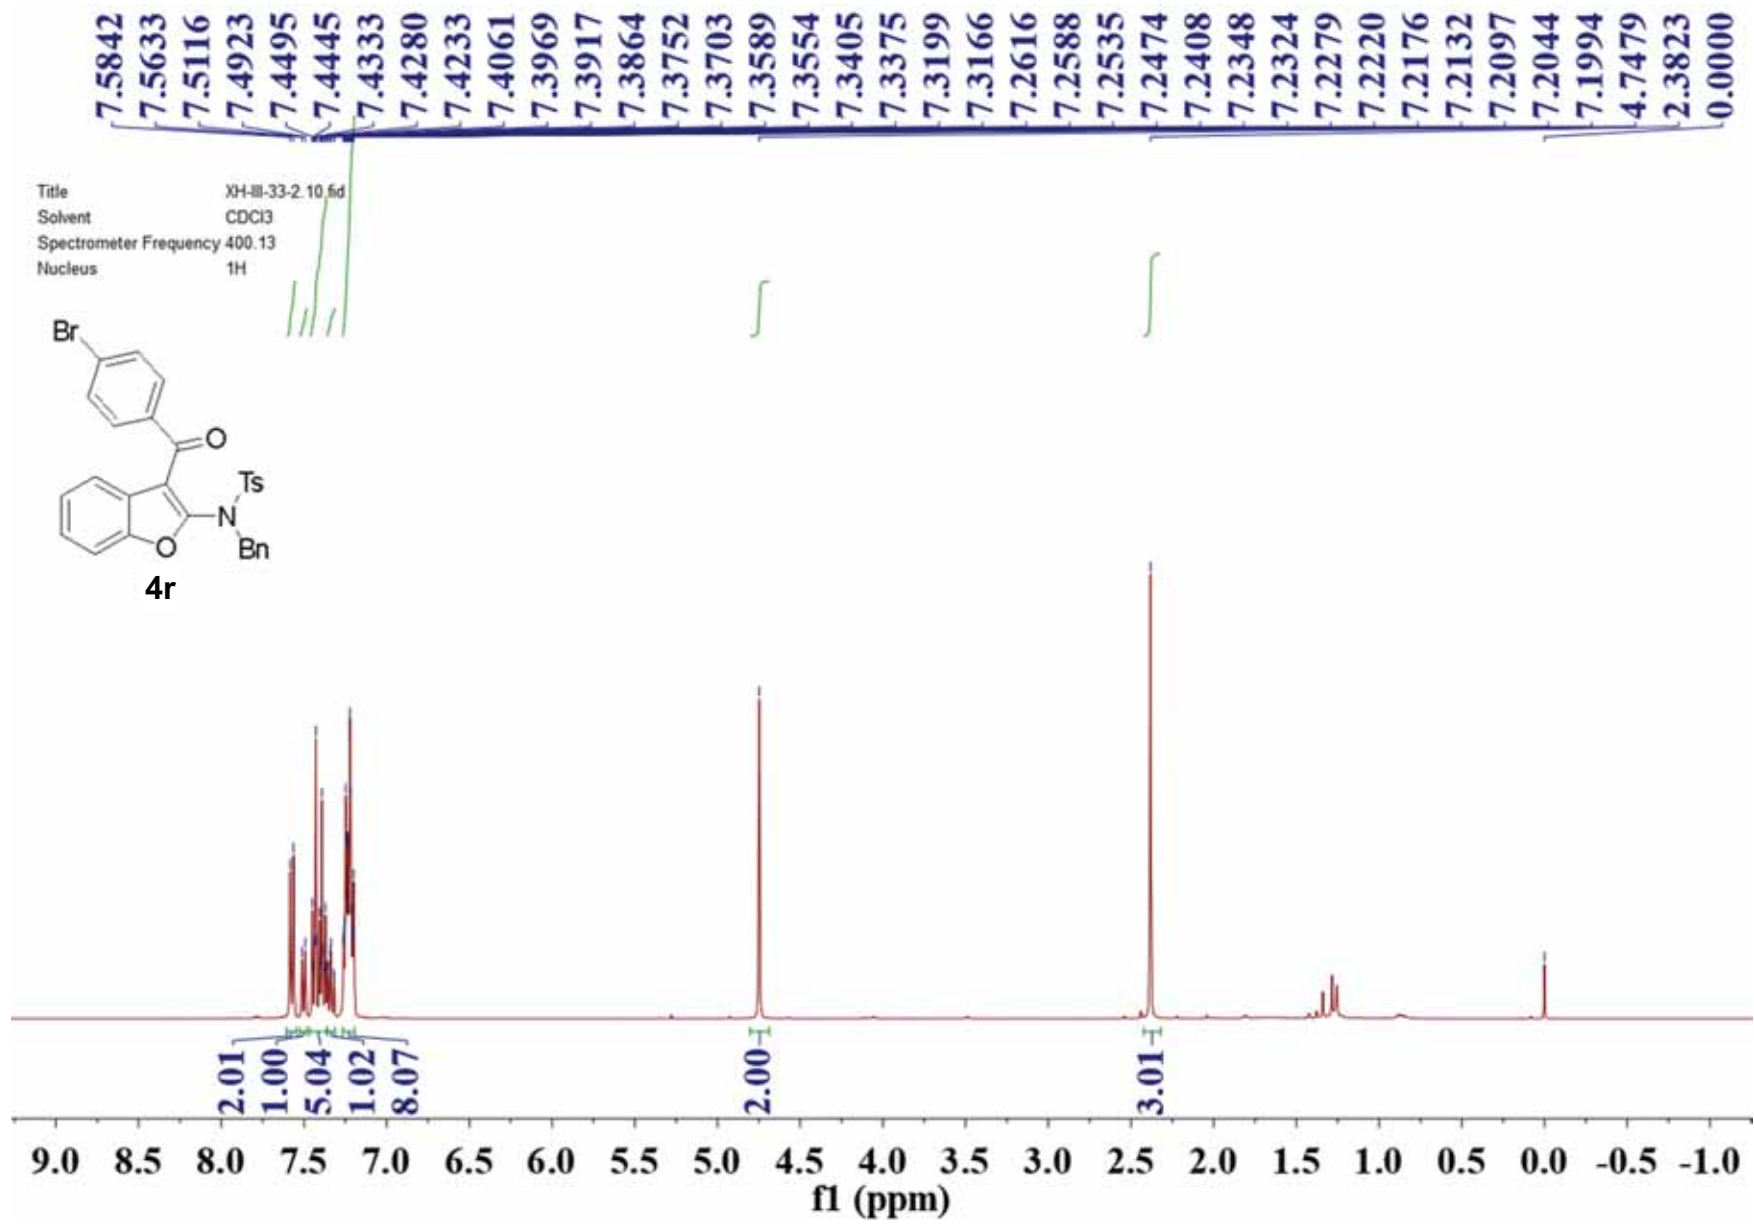

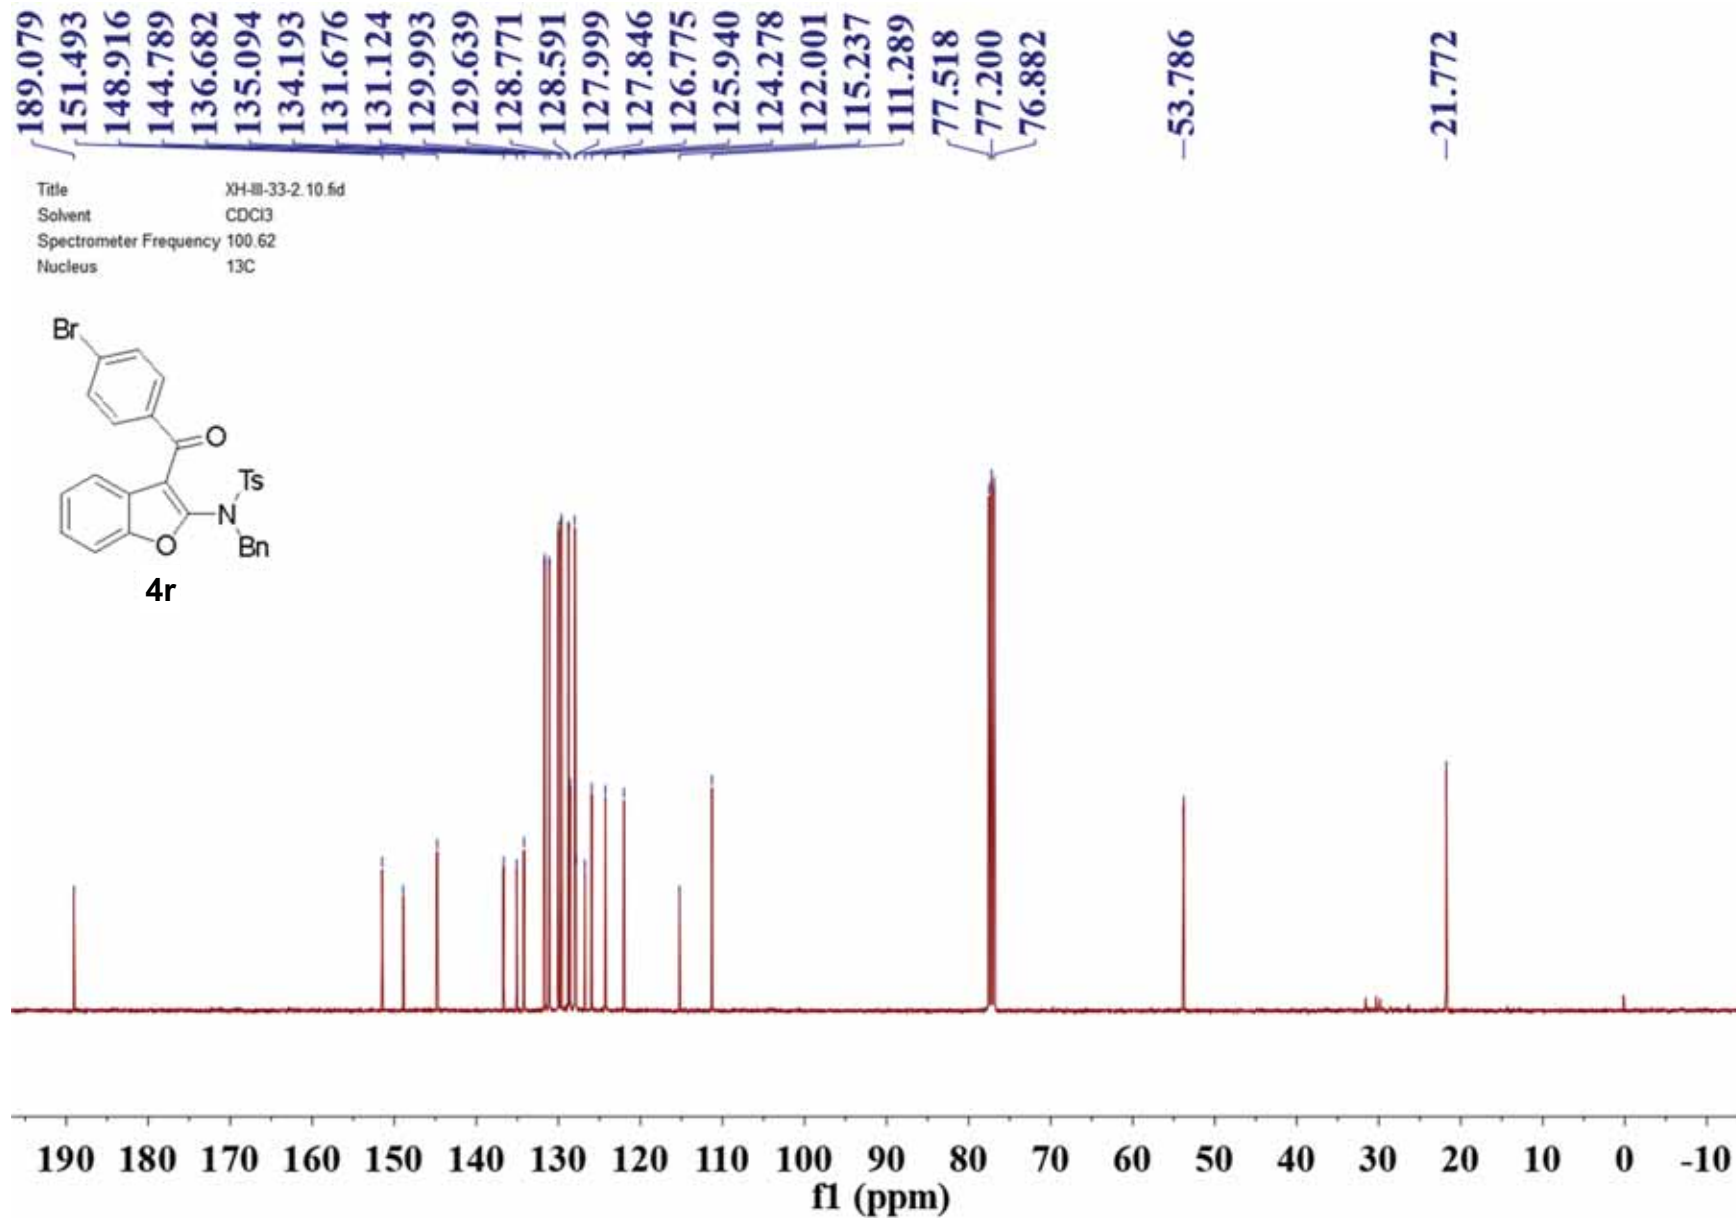

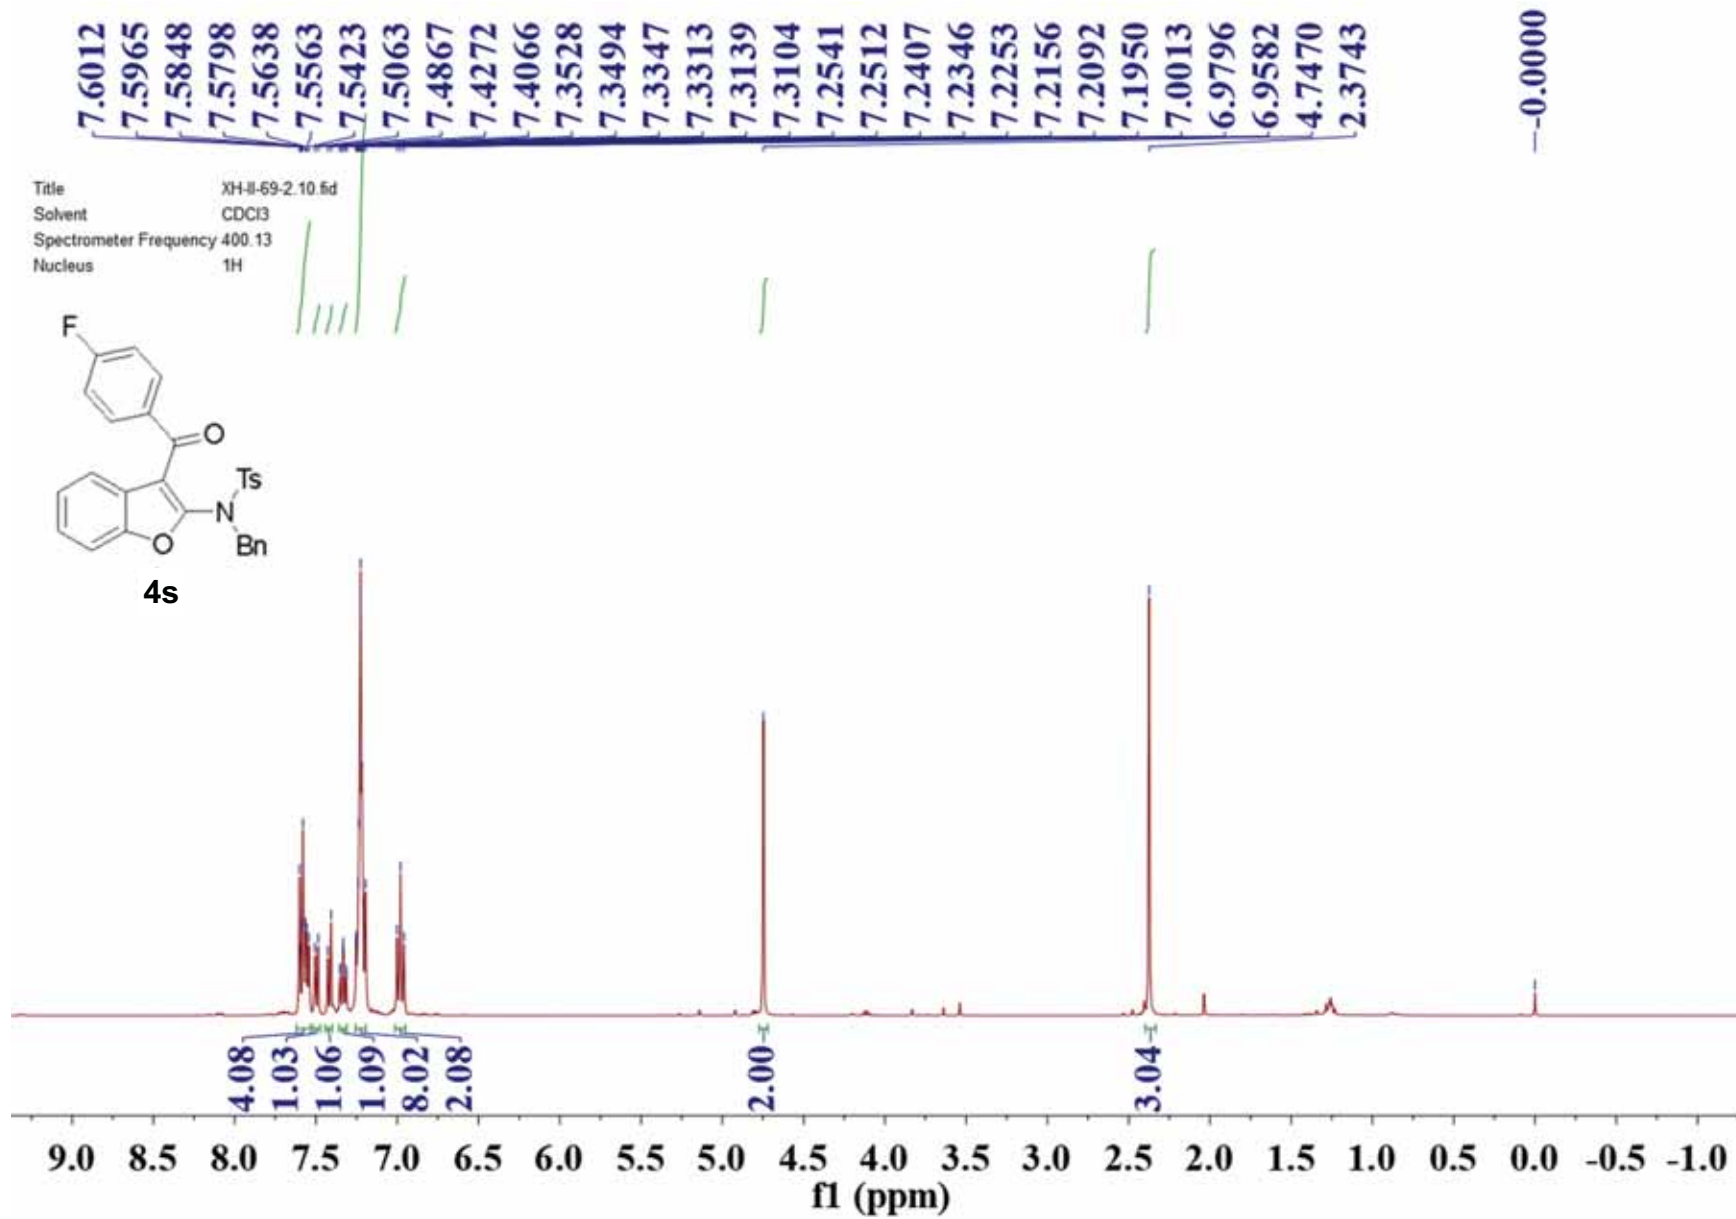

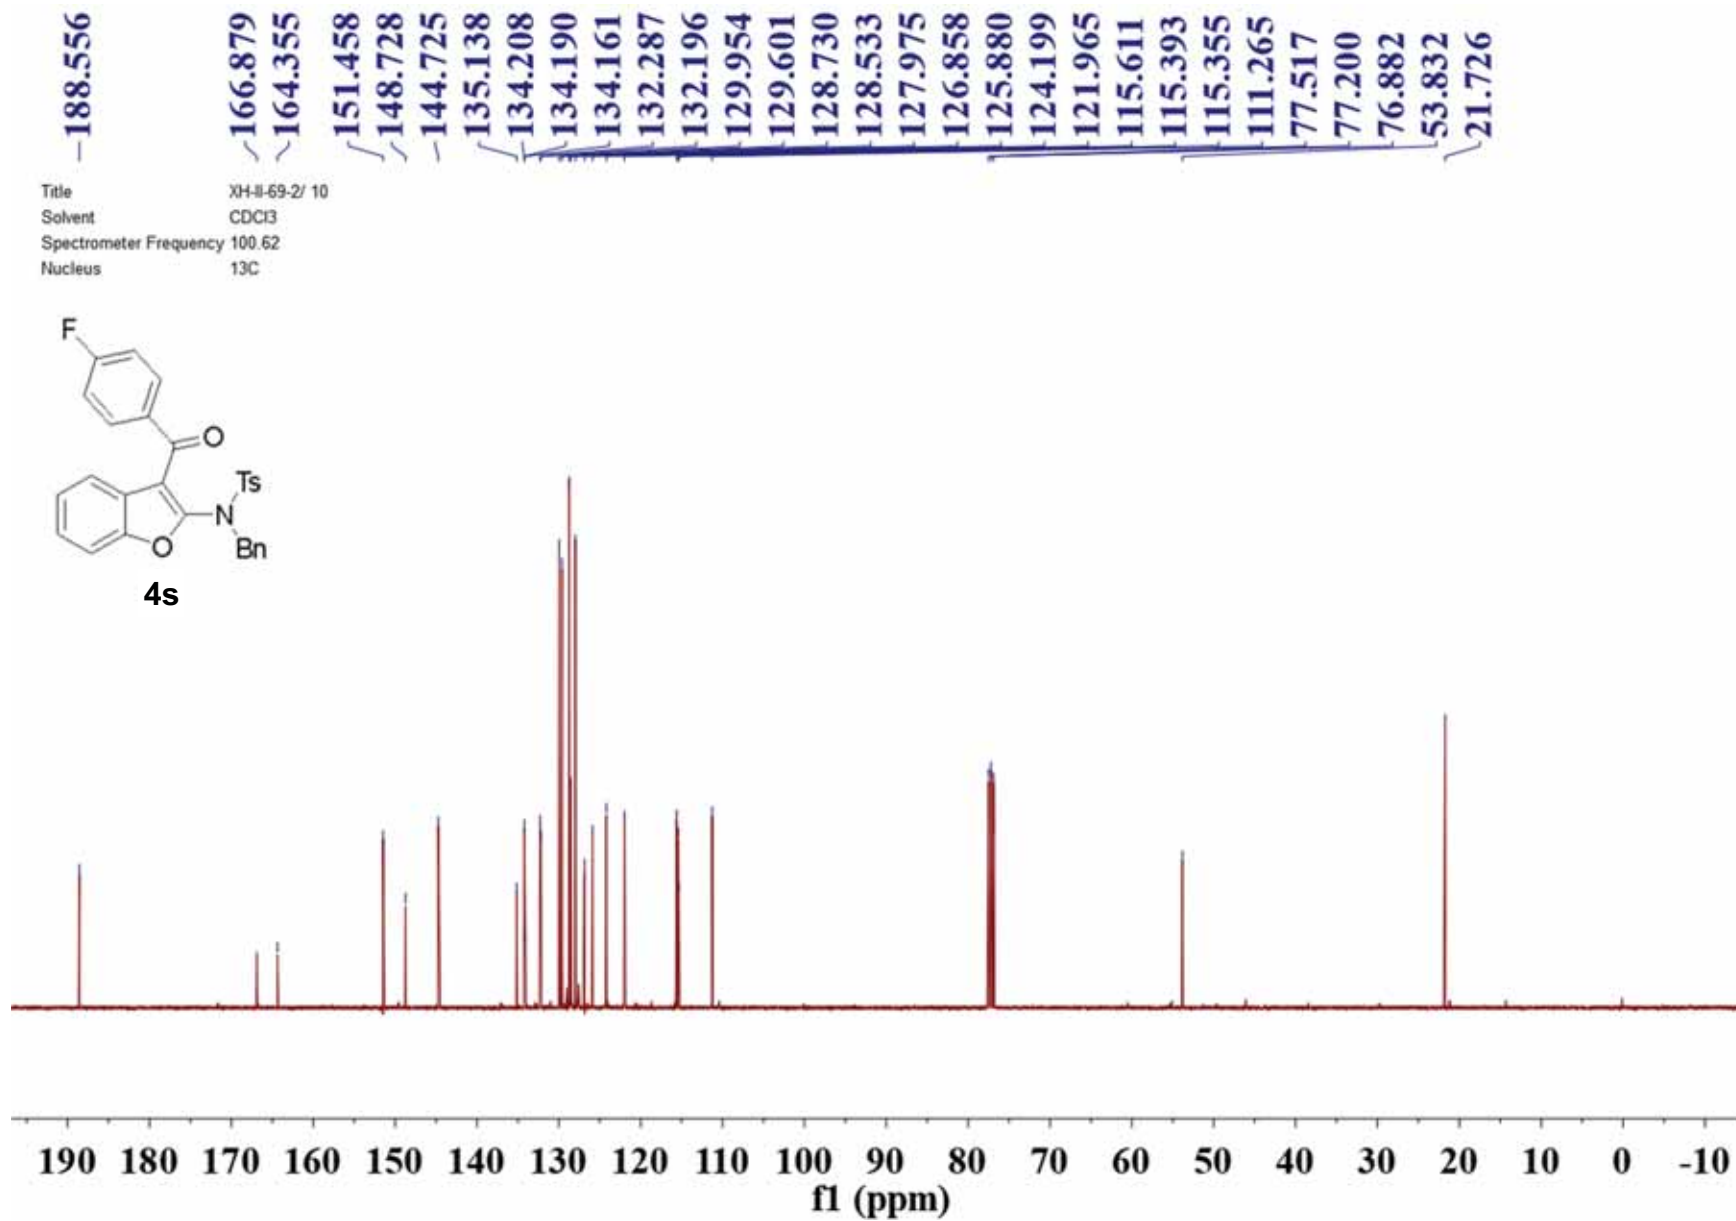

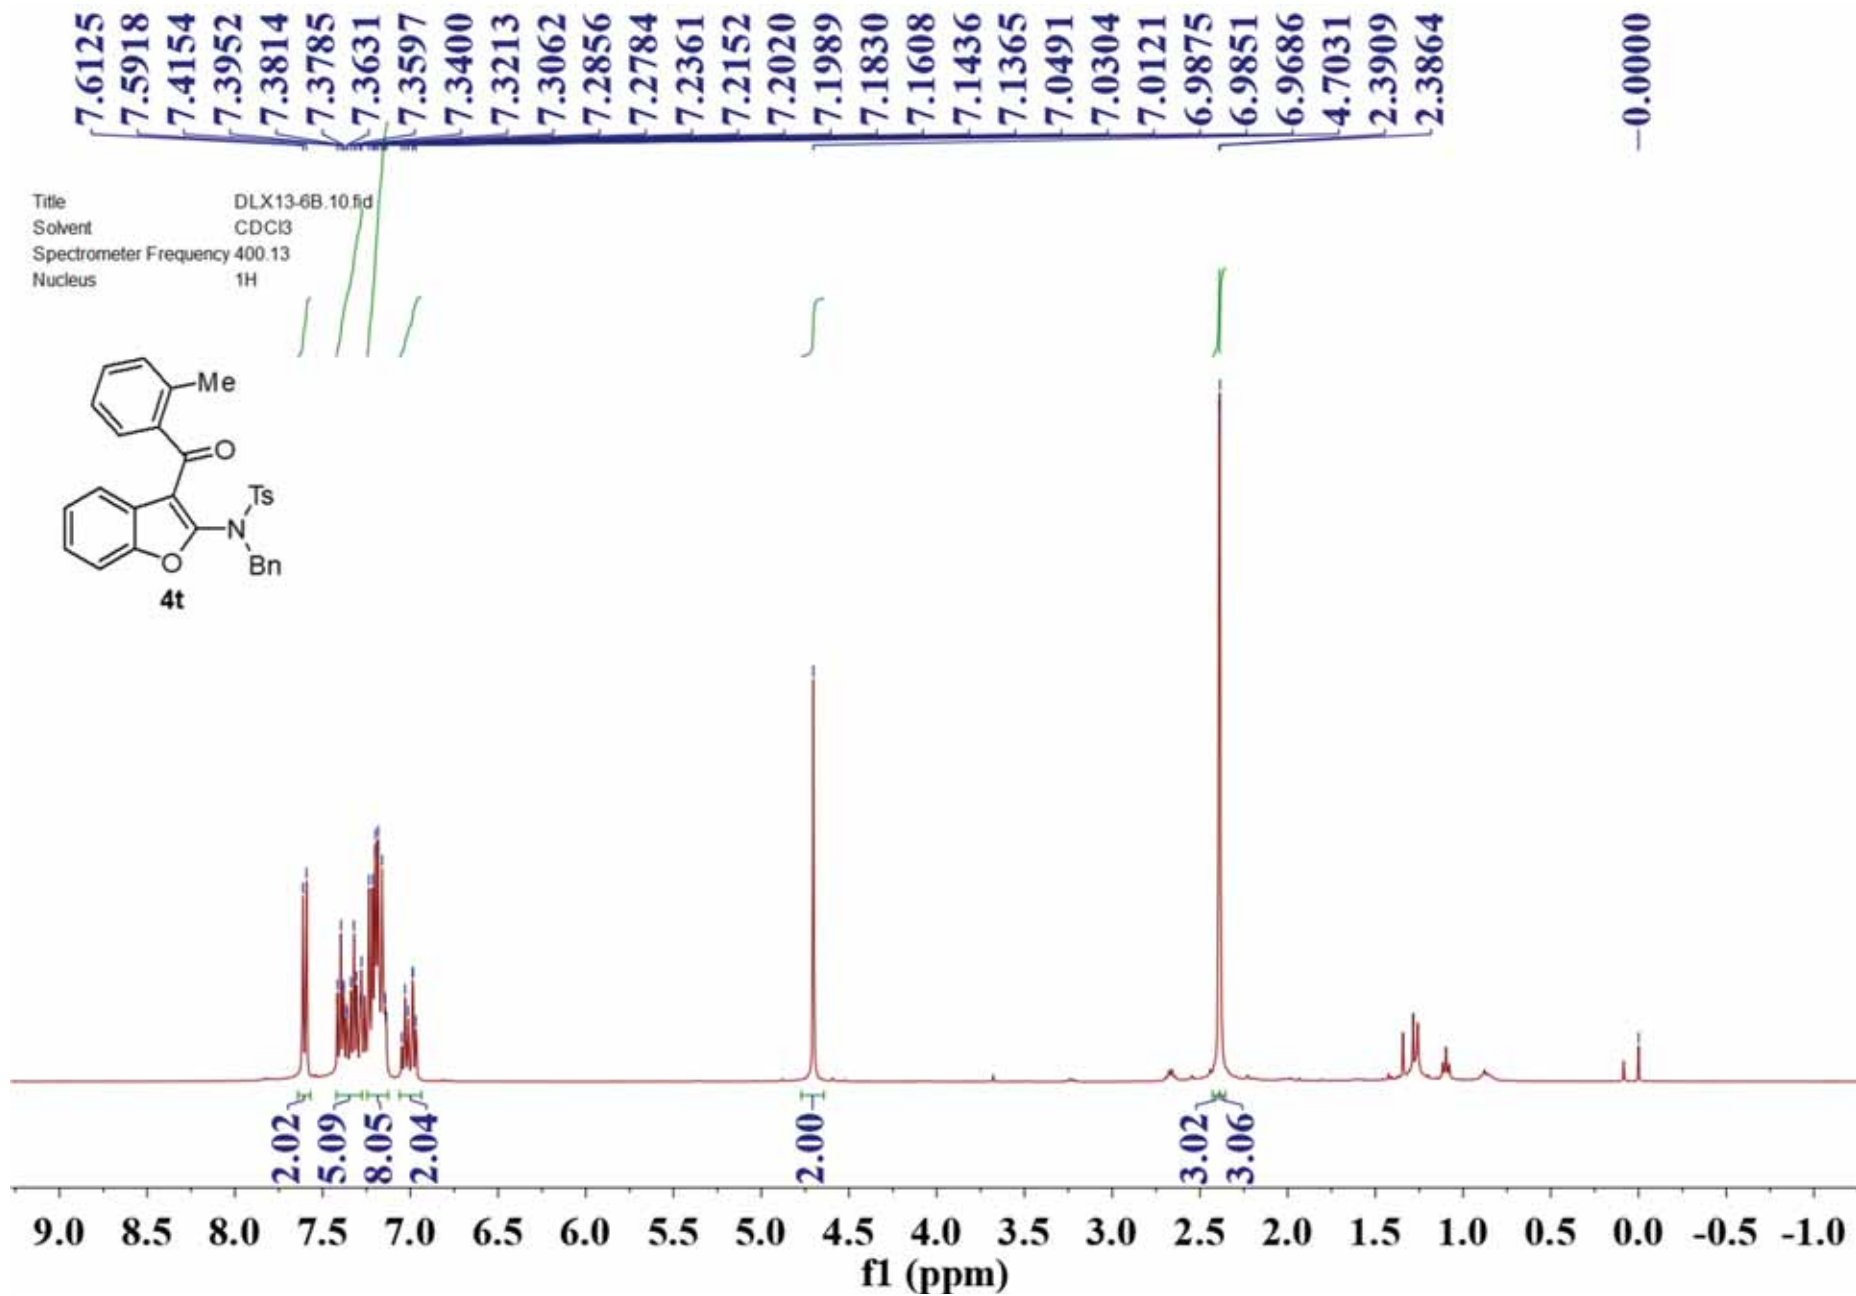

192.080  
 151.424  
 150.013  
 144.610  
 138.572  
 138.008  
 135.349  
 134.247  
 131.385  
 130.974  
 129.887  
 129.469  
 129.419  
 128.621  
 128.343  
 128.135  
 126.595  
 125.747  
 125.523  
 124.228  
 122.090  
 116.205  
 111.213  
 77.518  
 77.200  
 76.882  
 -53.686  
 21.753  
 20.107

Title DLX13-6B.10.fid  
 Solvent CDCl3  
 Spectrometer Frequency 400.13  
 Nucleus 1H

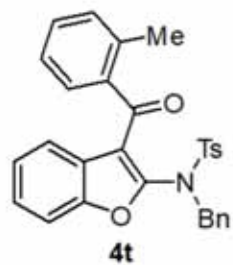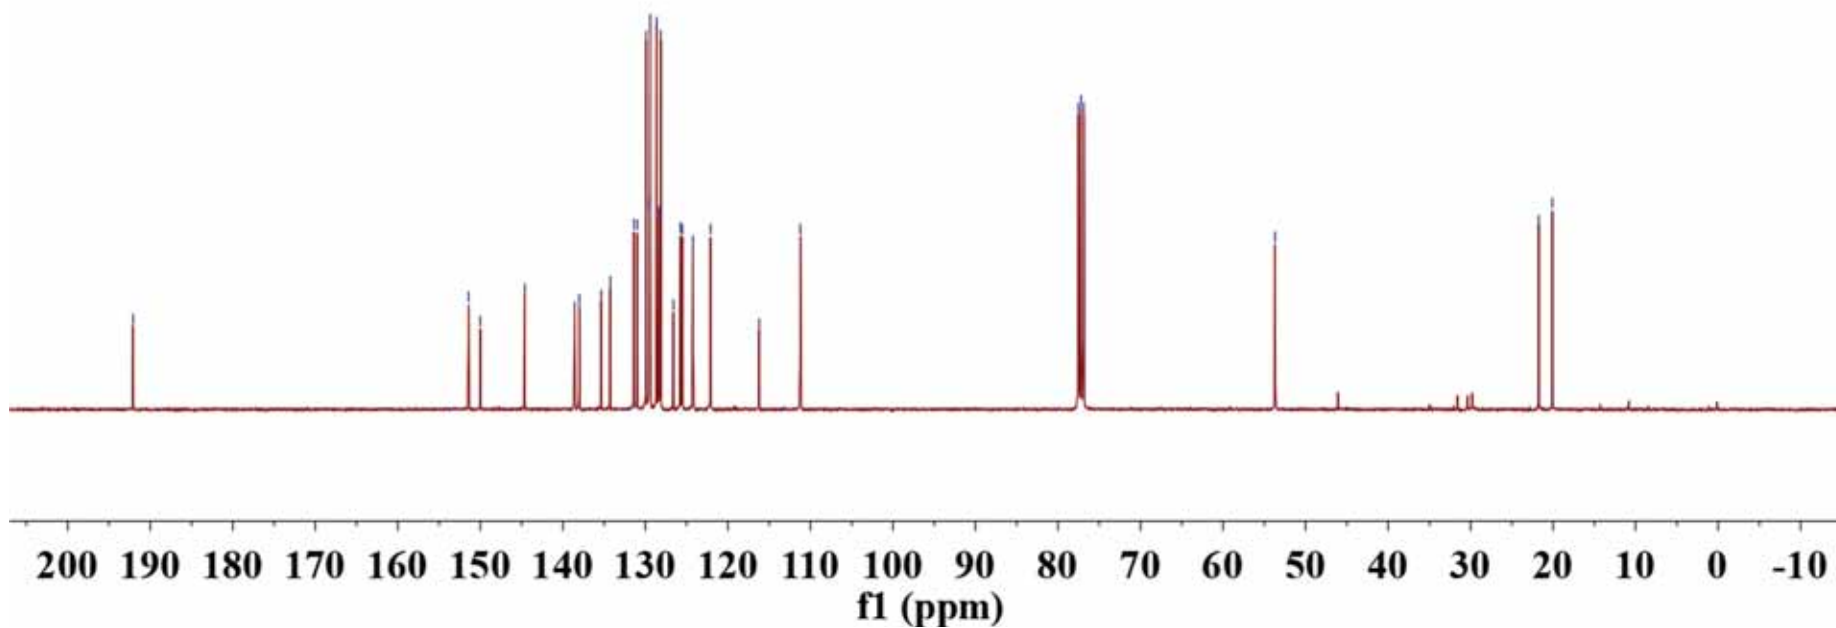

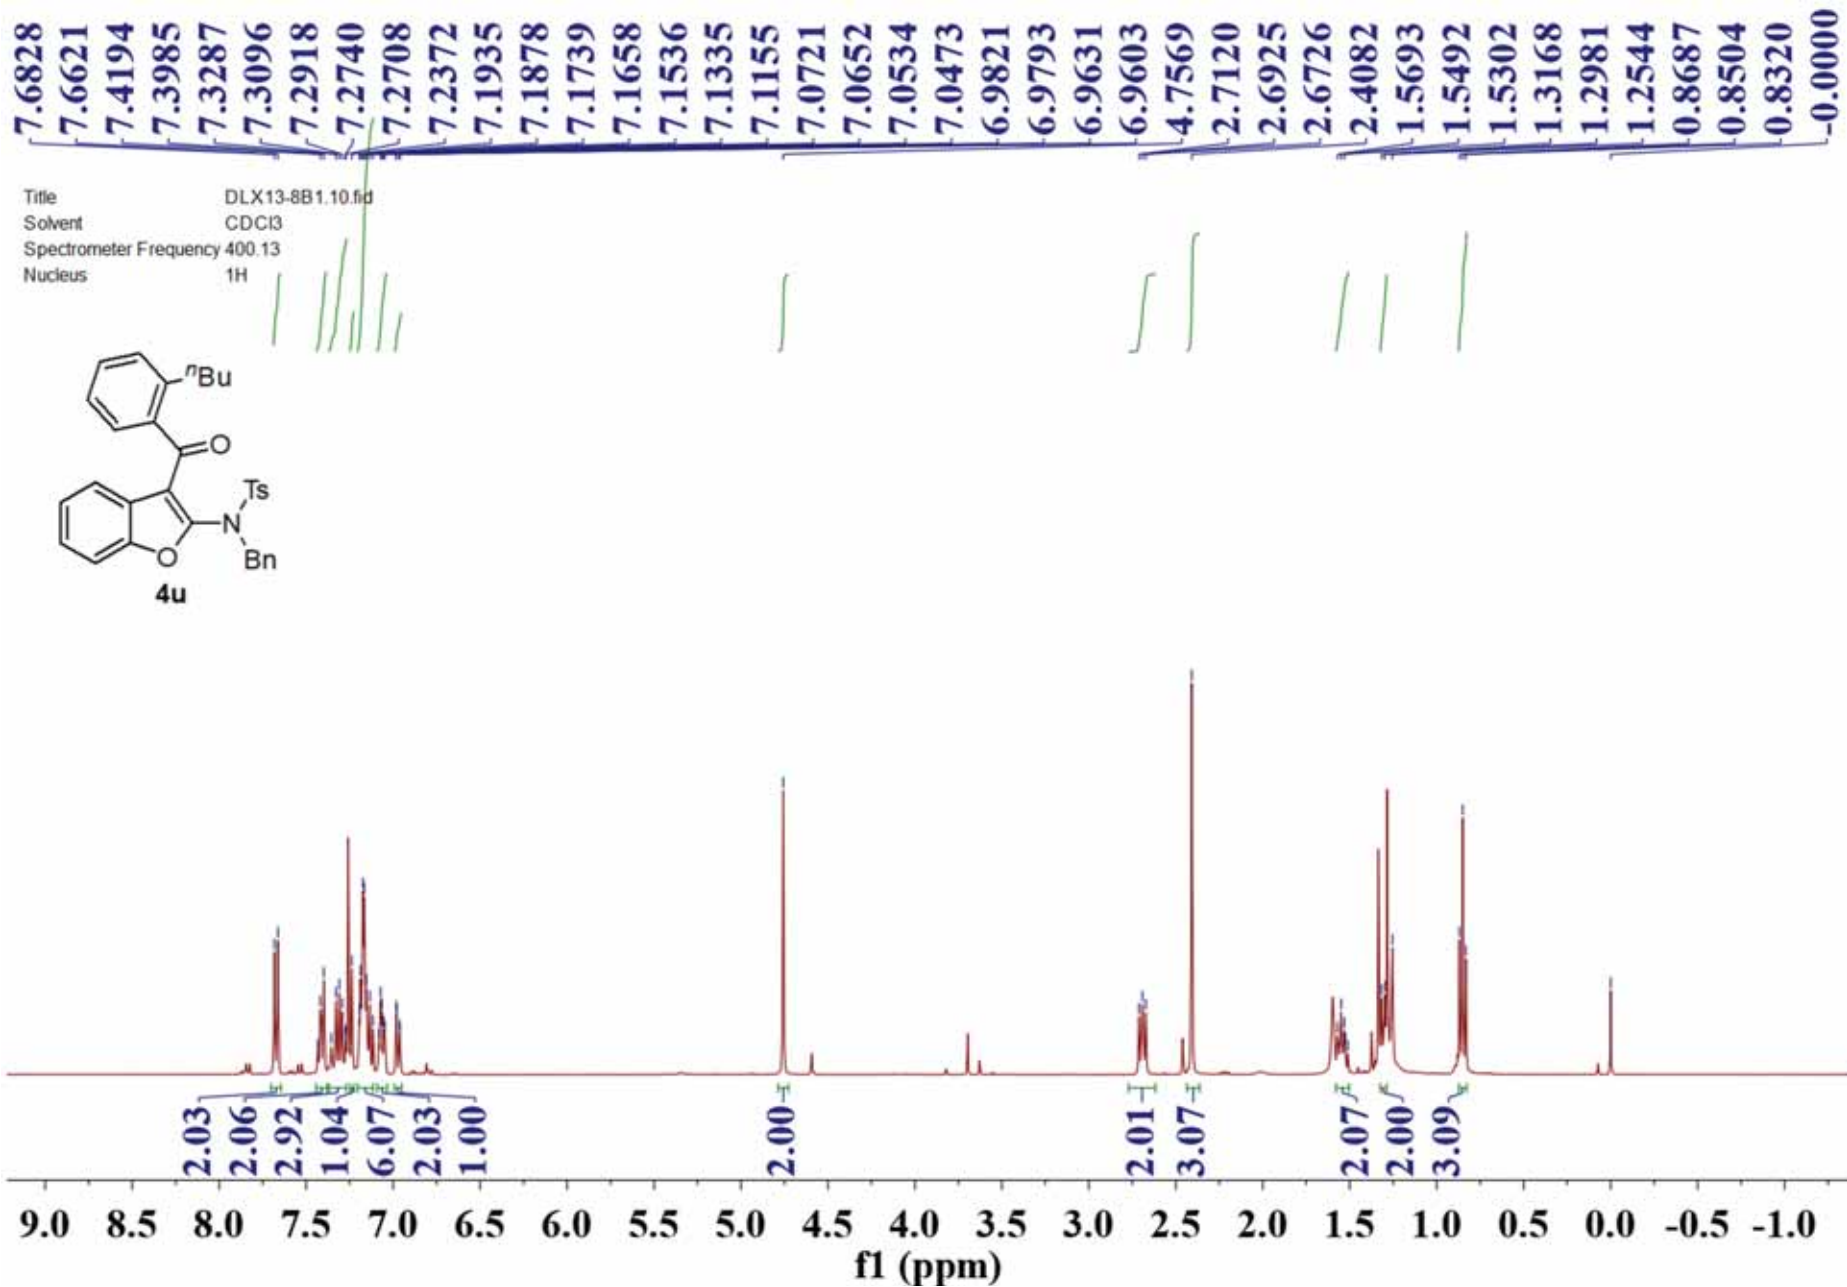

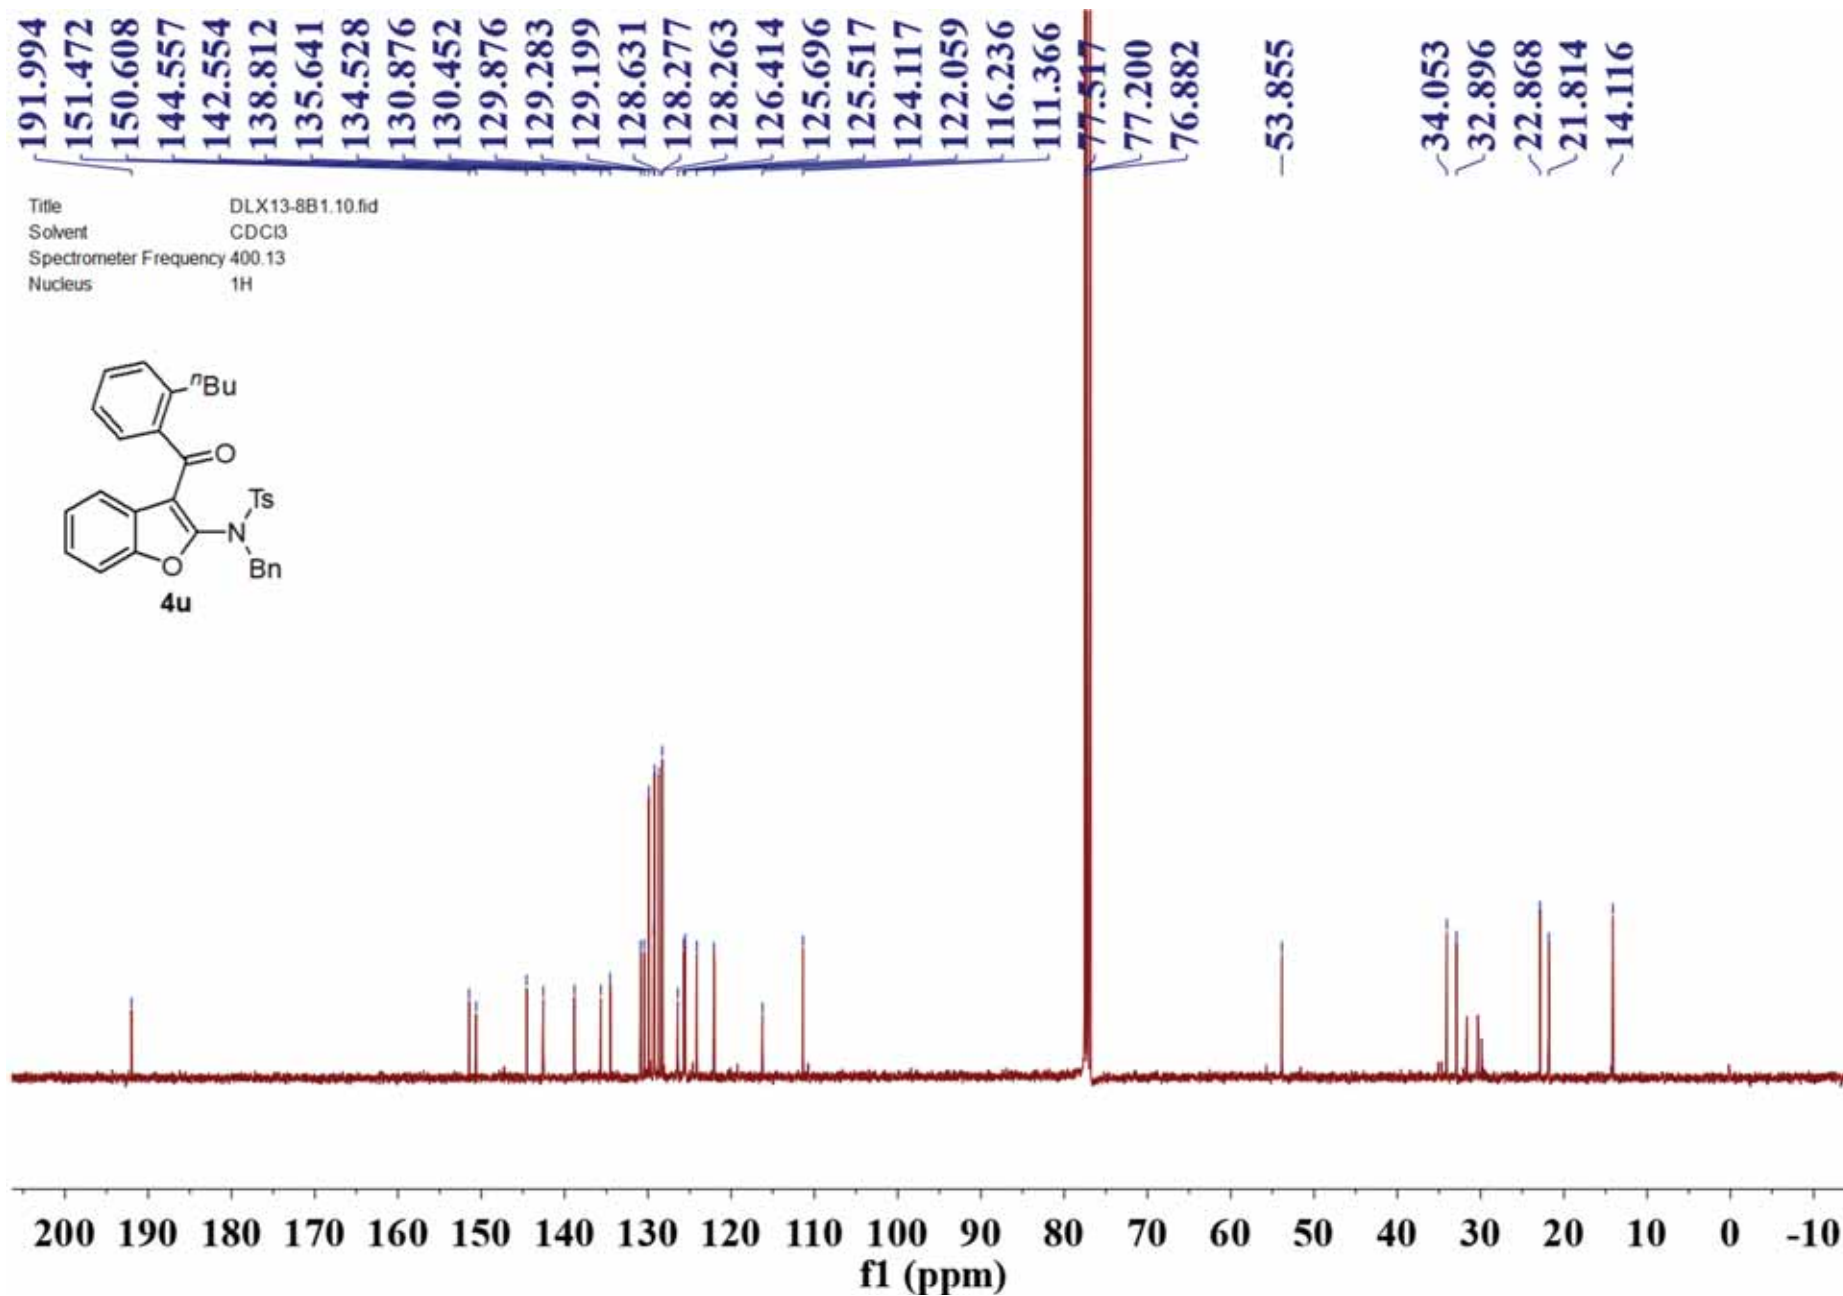



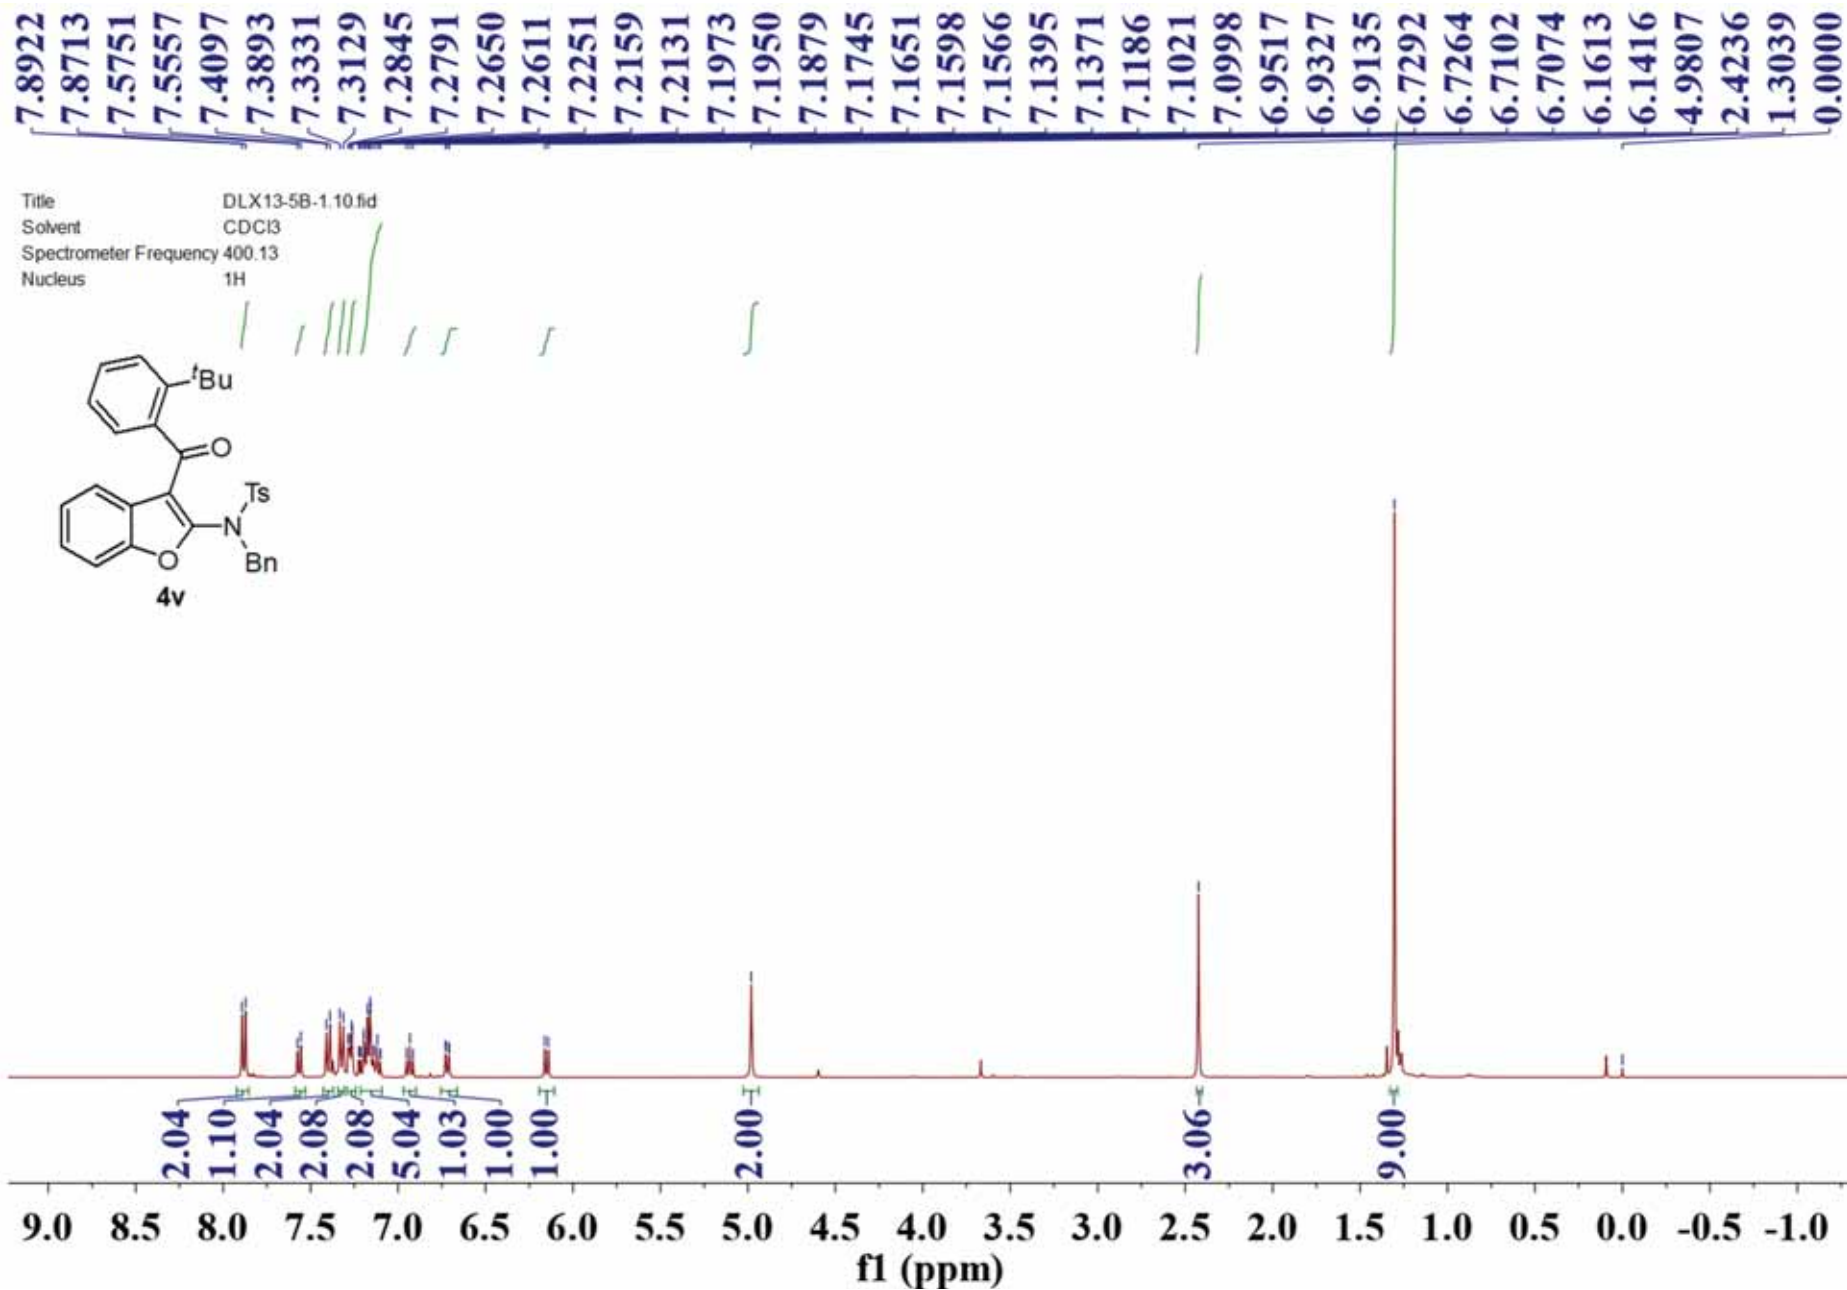

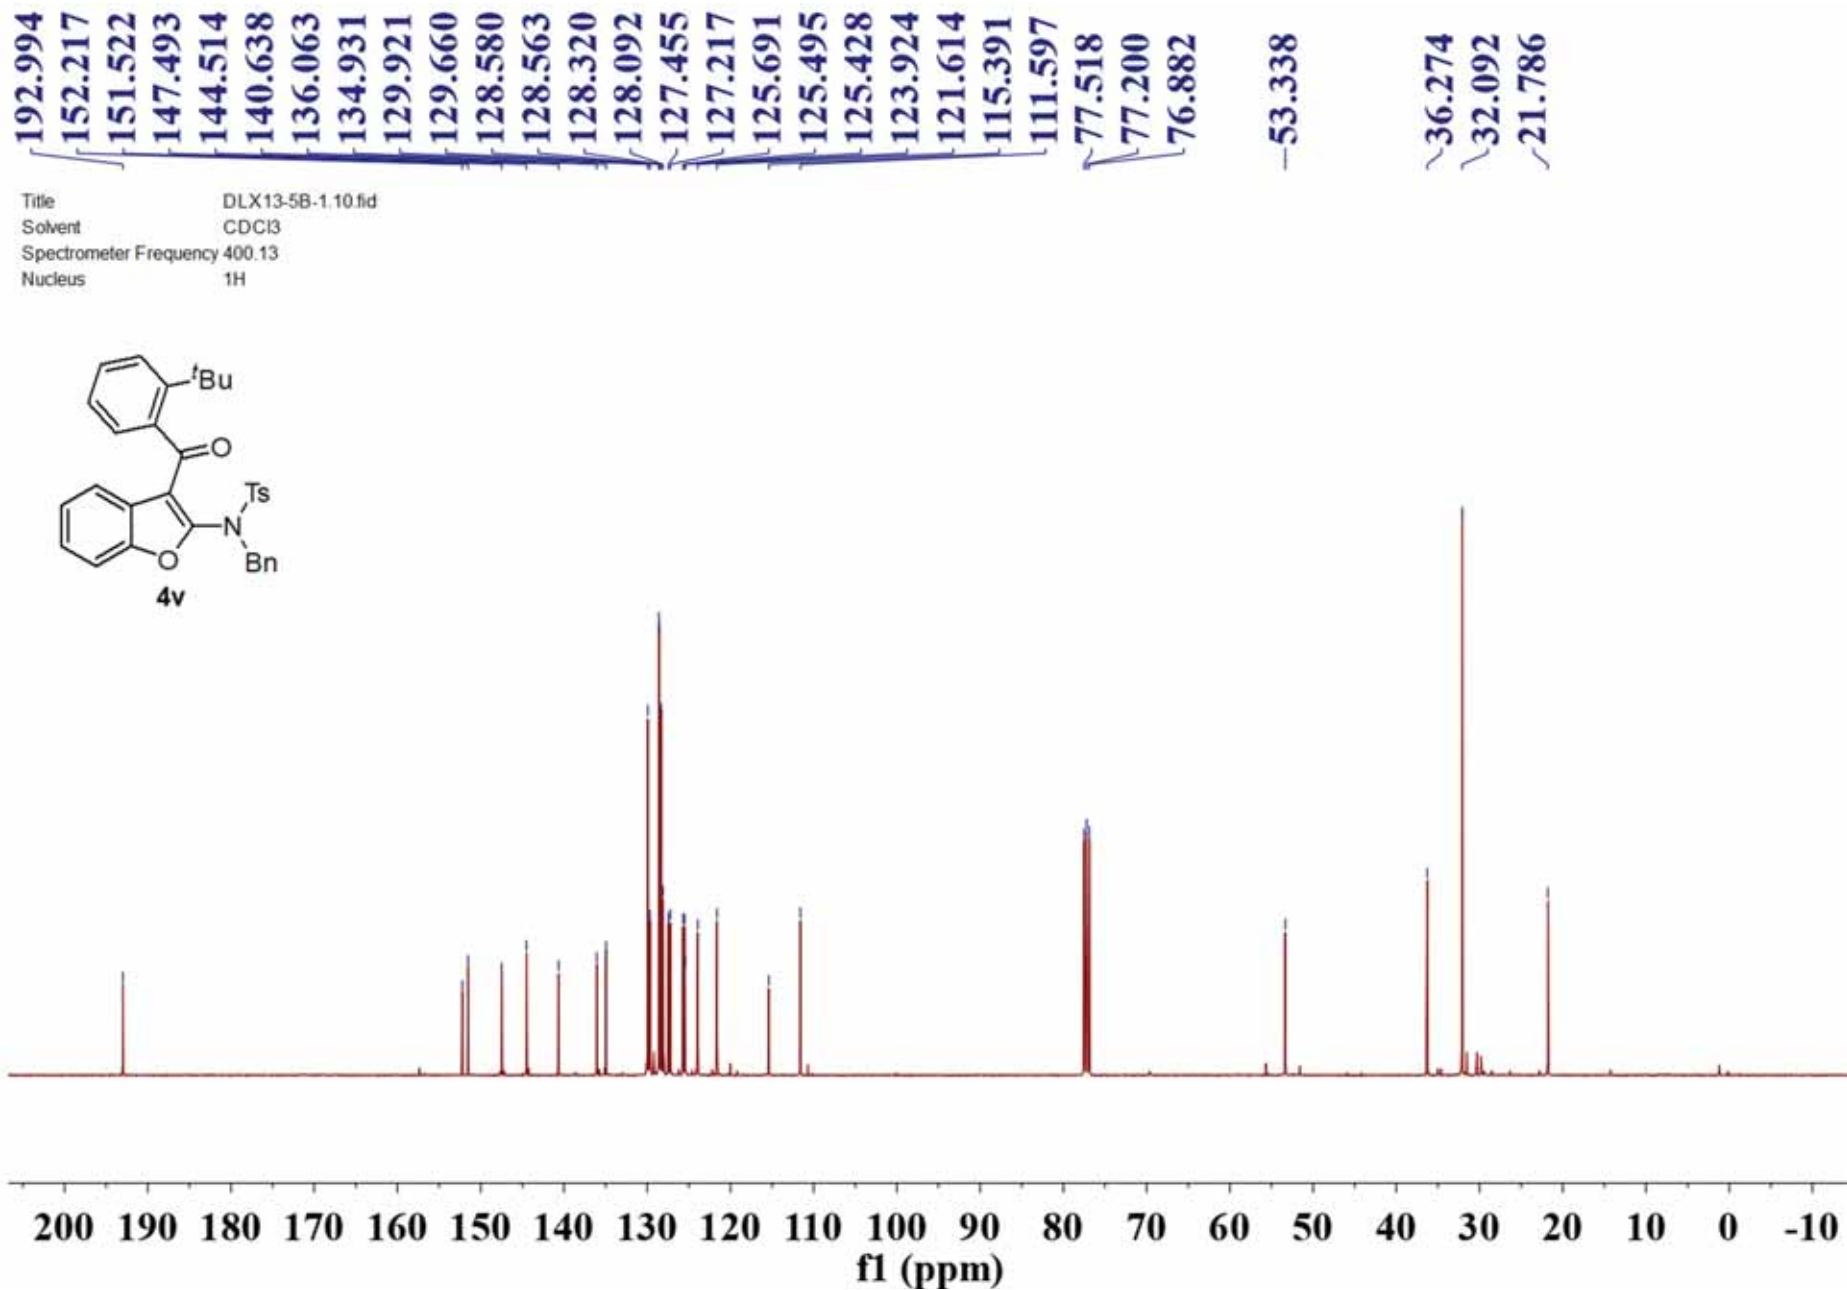

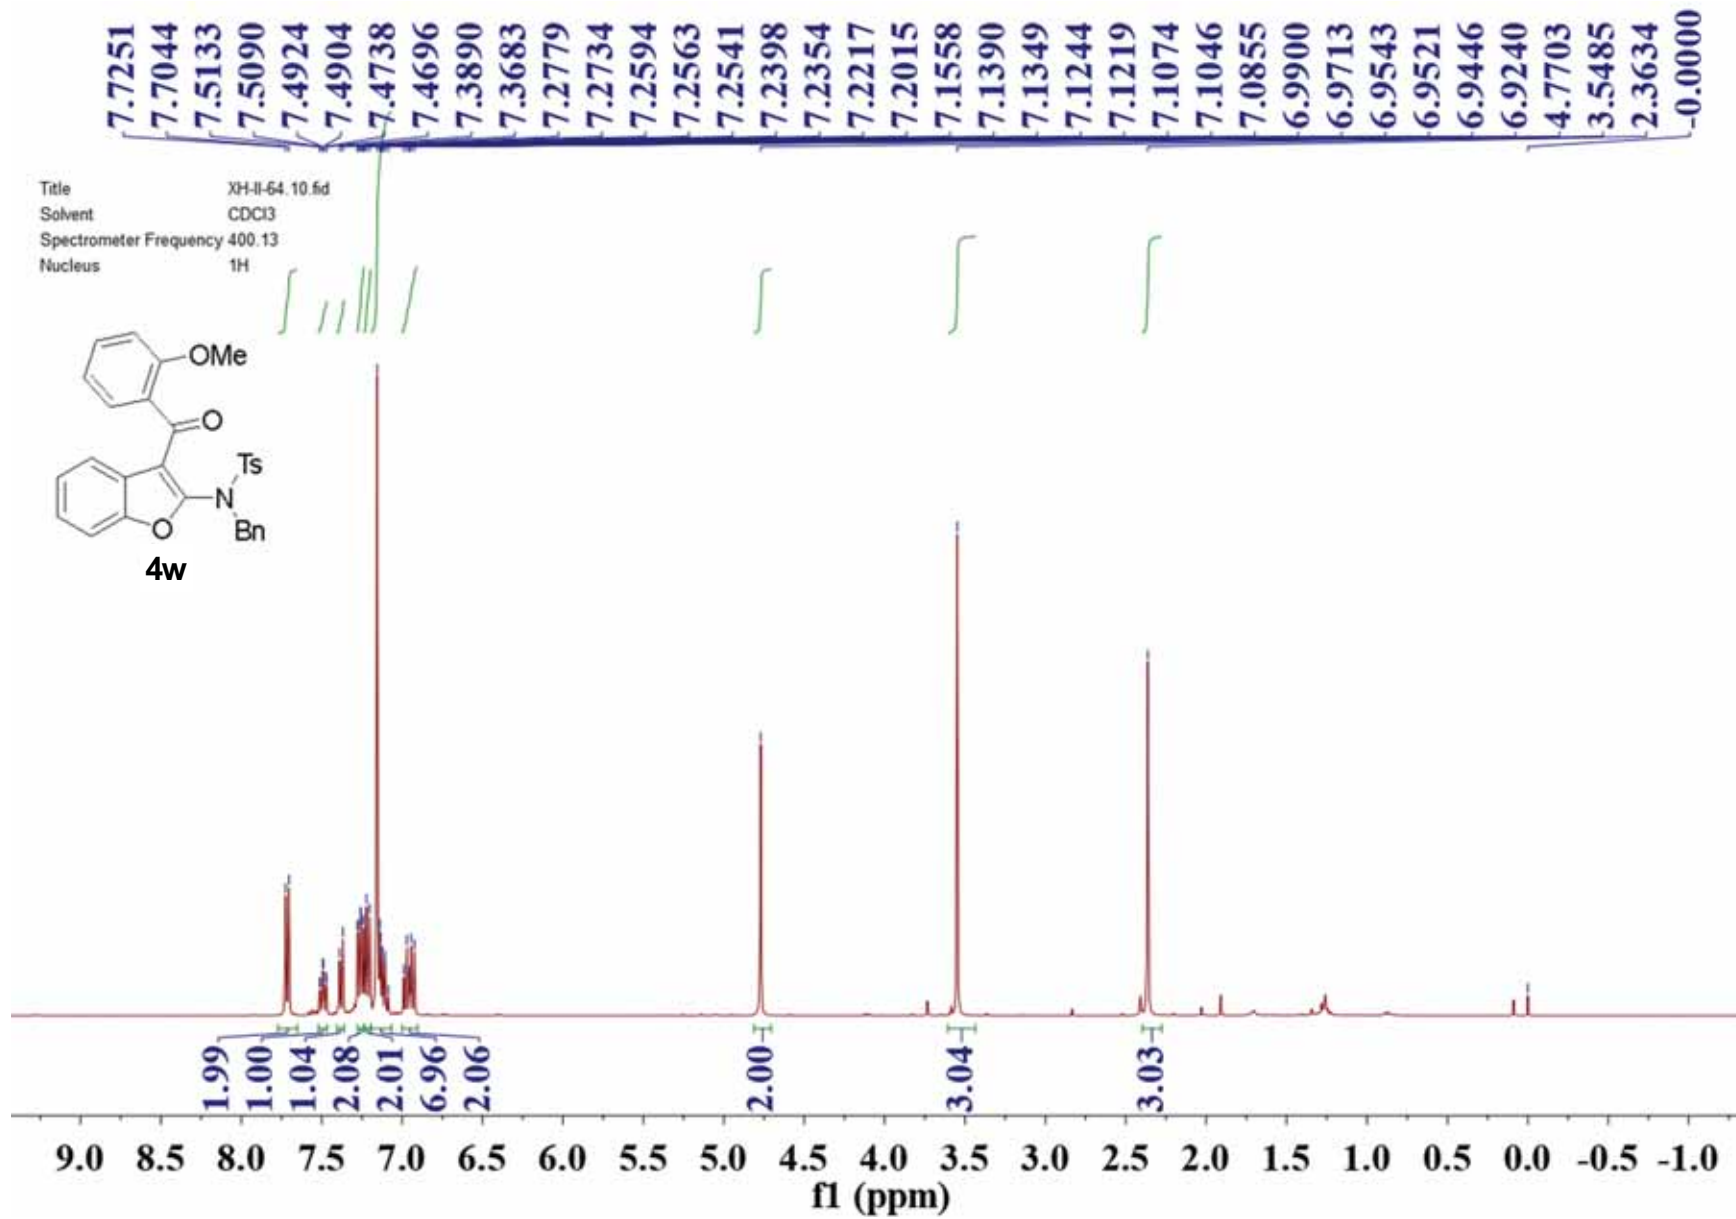

189.436  
 157.797  
 151.349  
 150.544  
 144.339  
 135.891  
 134.861  
 132.879  
 130.215  
 129.725  
 129.380  
 128.938  
 128.453  
 128.176  
 127.984  
 126.105  
 125.512  
 123.863  
 121.548  
 120.538  
 116.701  
 111.583  
 111.317  
 77.518  
 77.200  
 76.883  
 55.603  
 54.310

-21.701

Title XH-II-64.10.fid  
 Solvent CDCl3  
 Spectrometer Frequency 100.62  
 Nucleus 13C

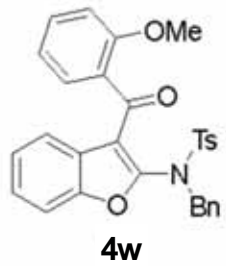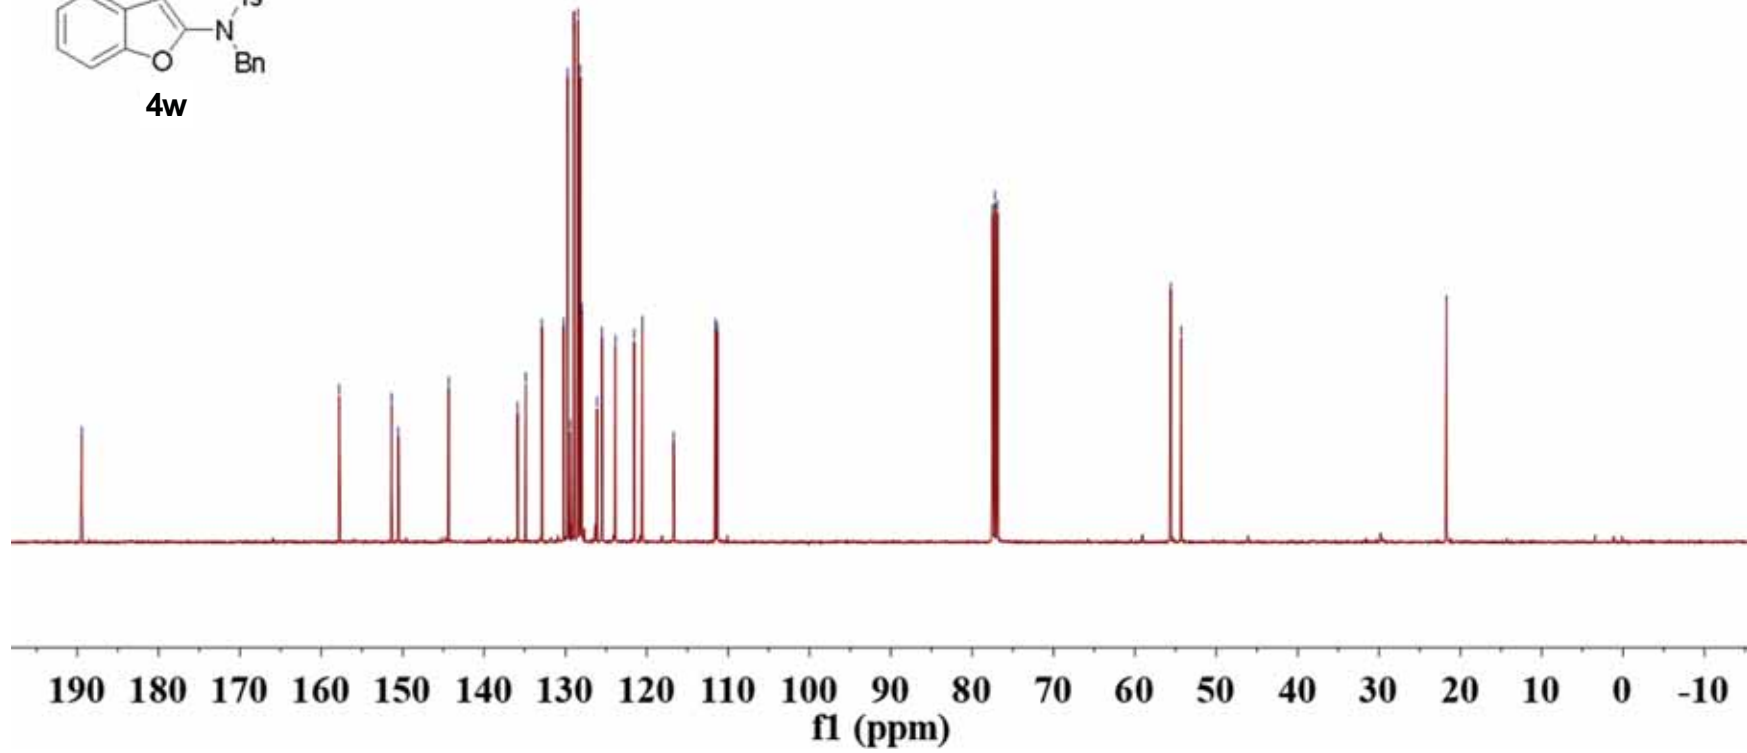

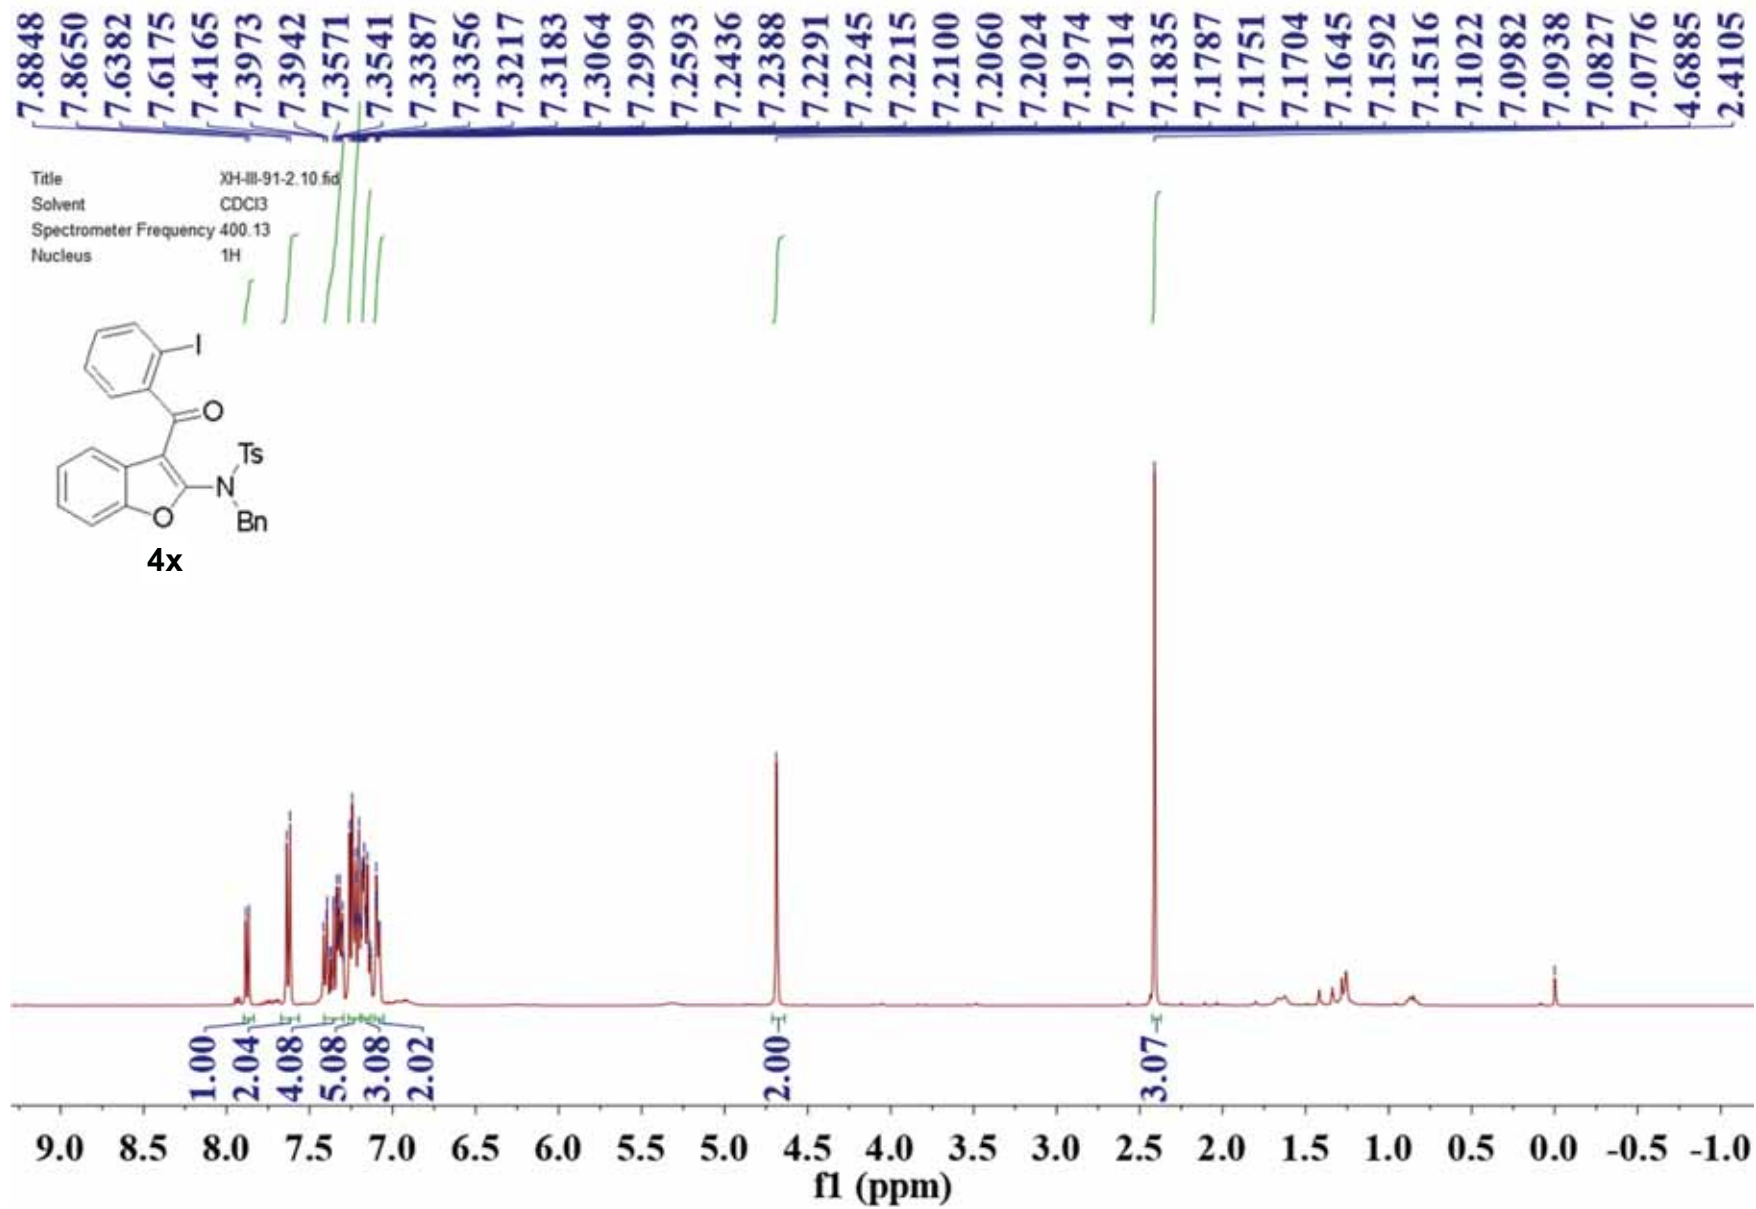

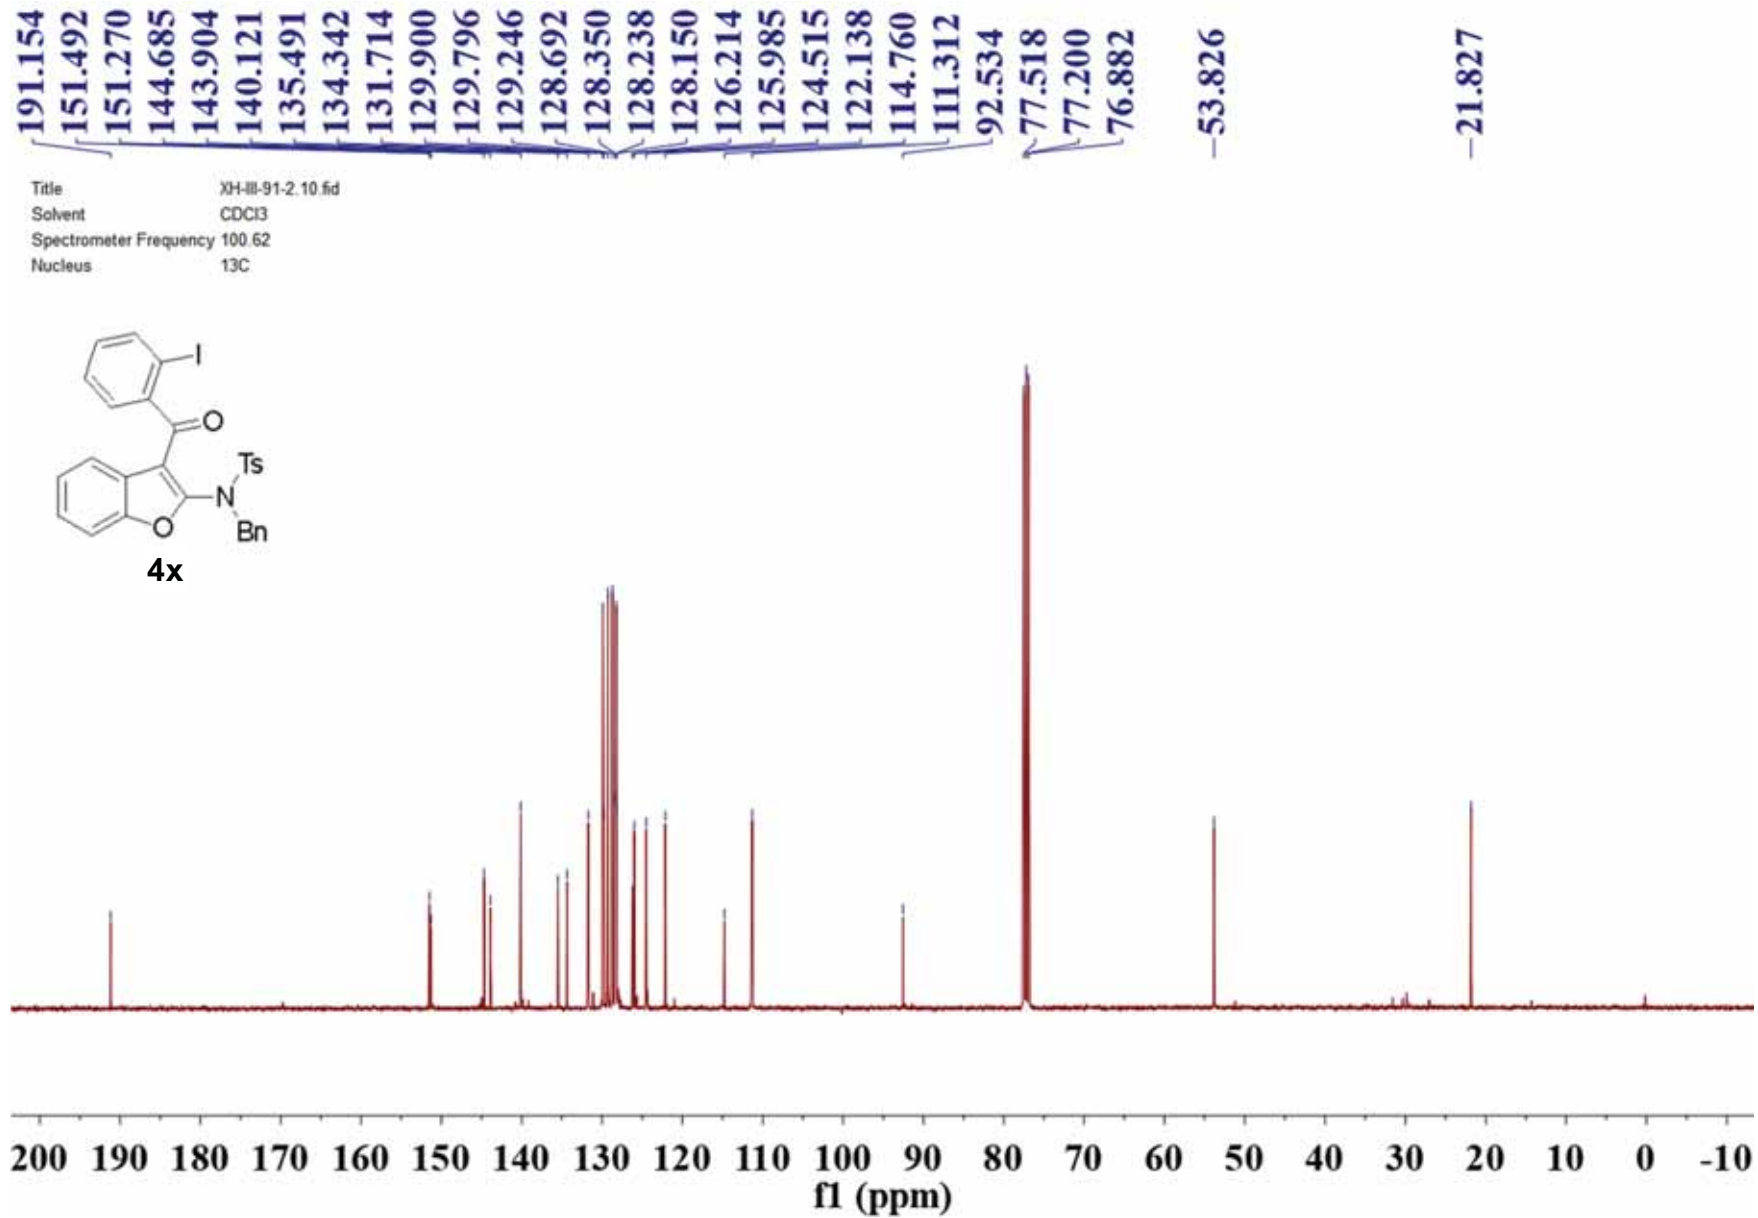

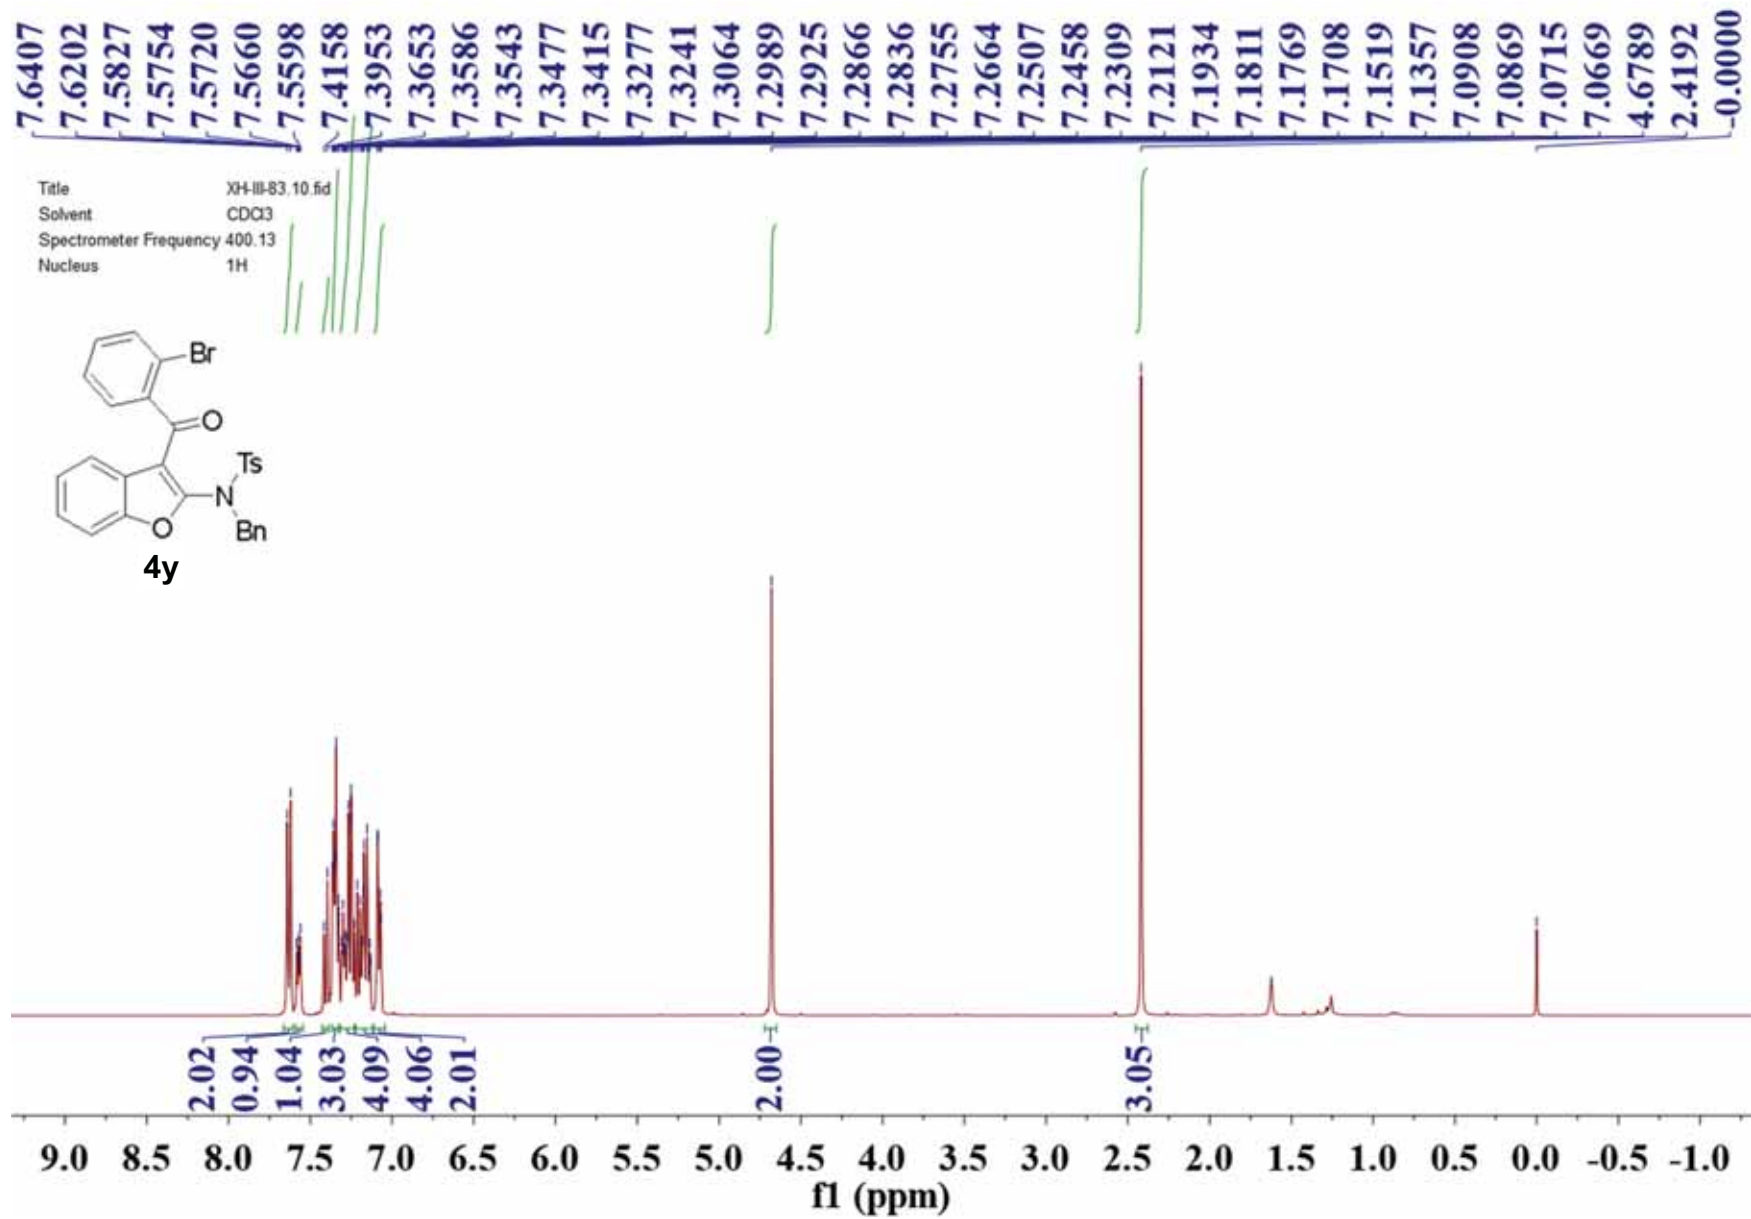

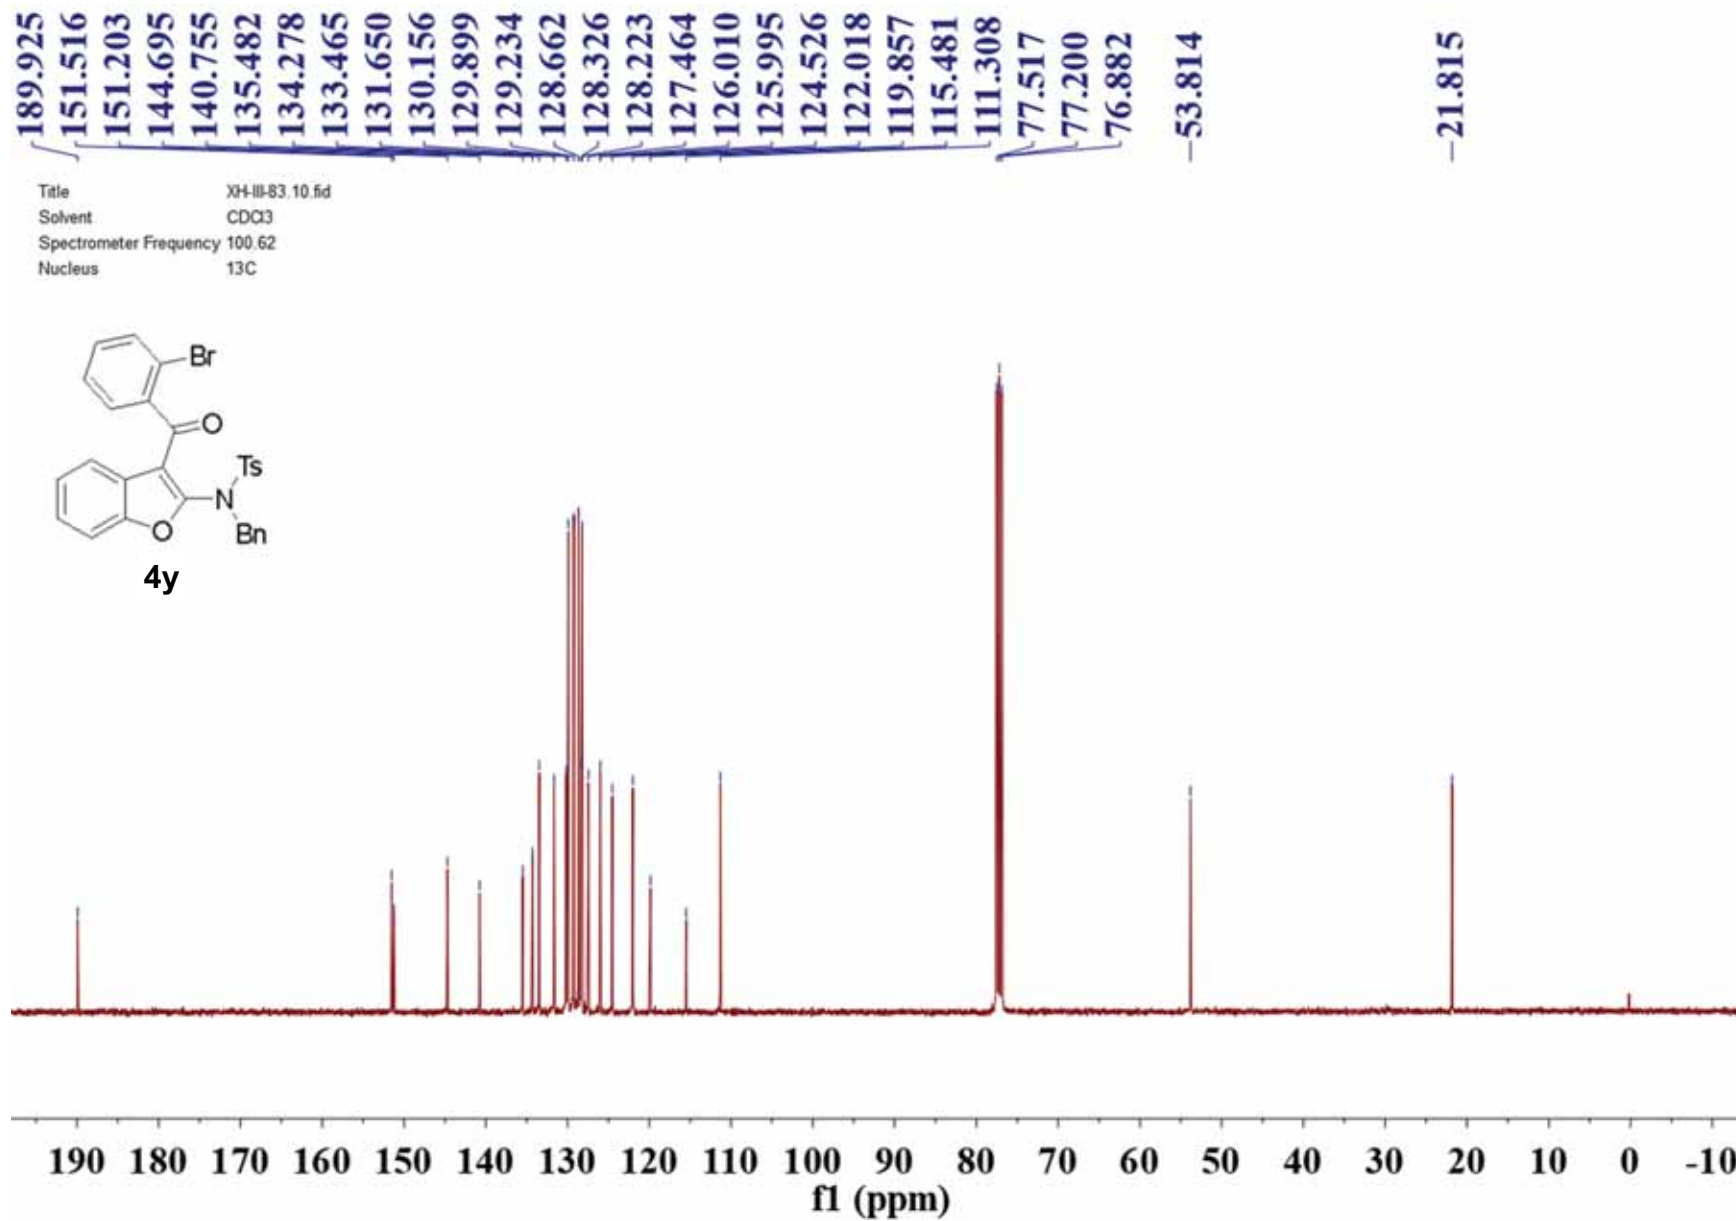



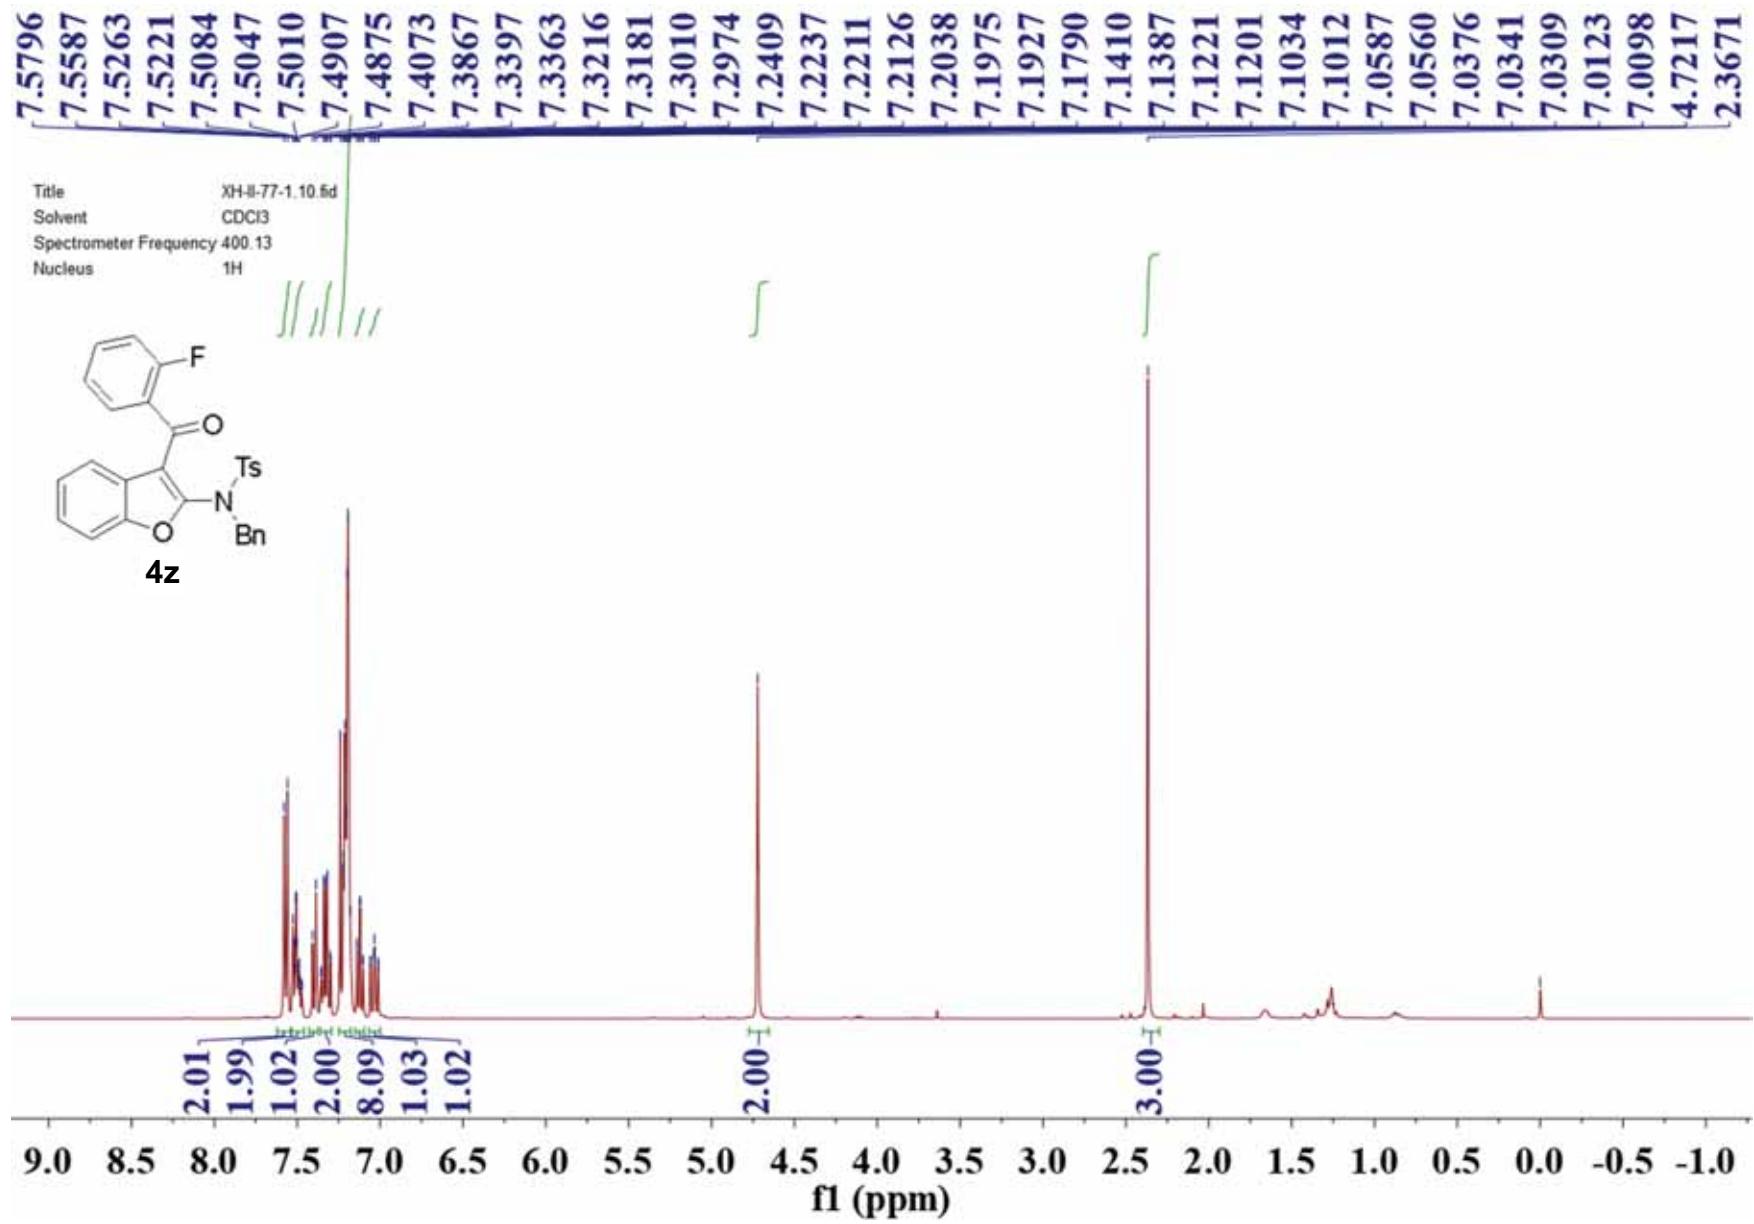

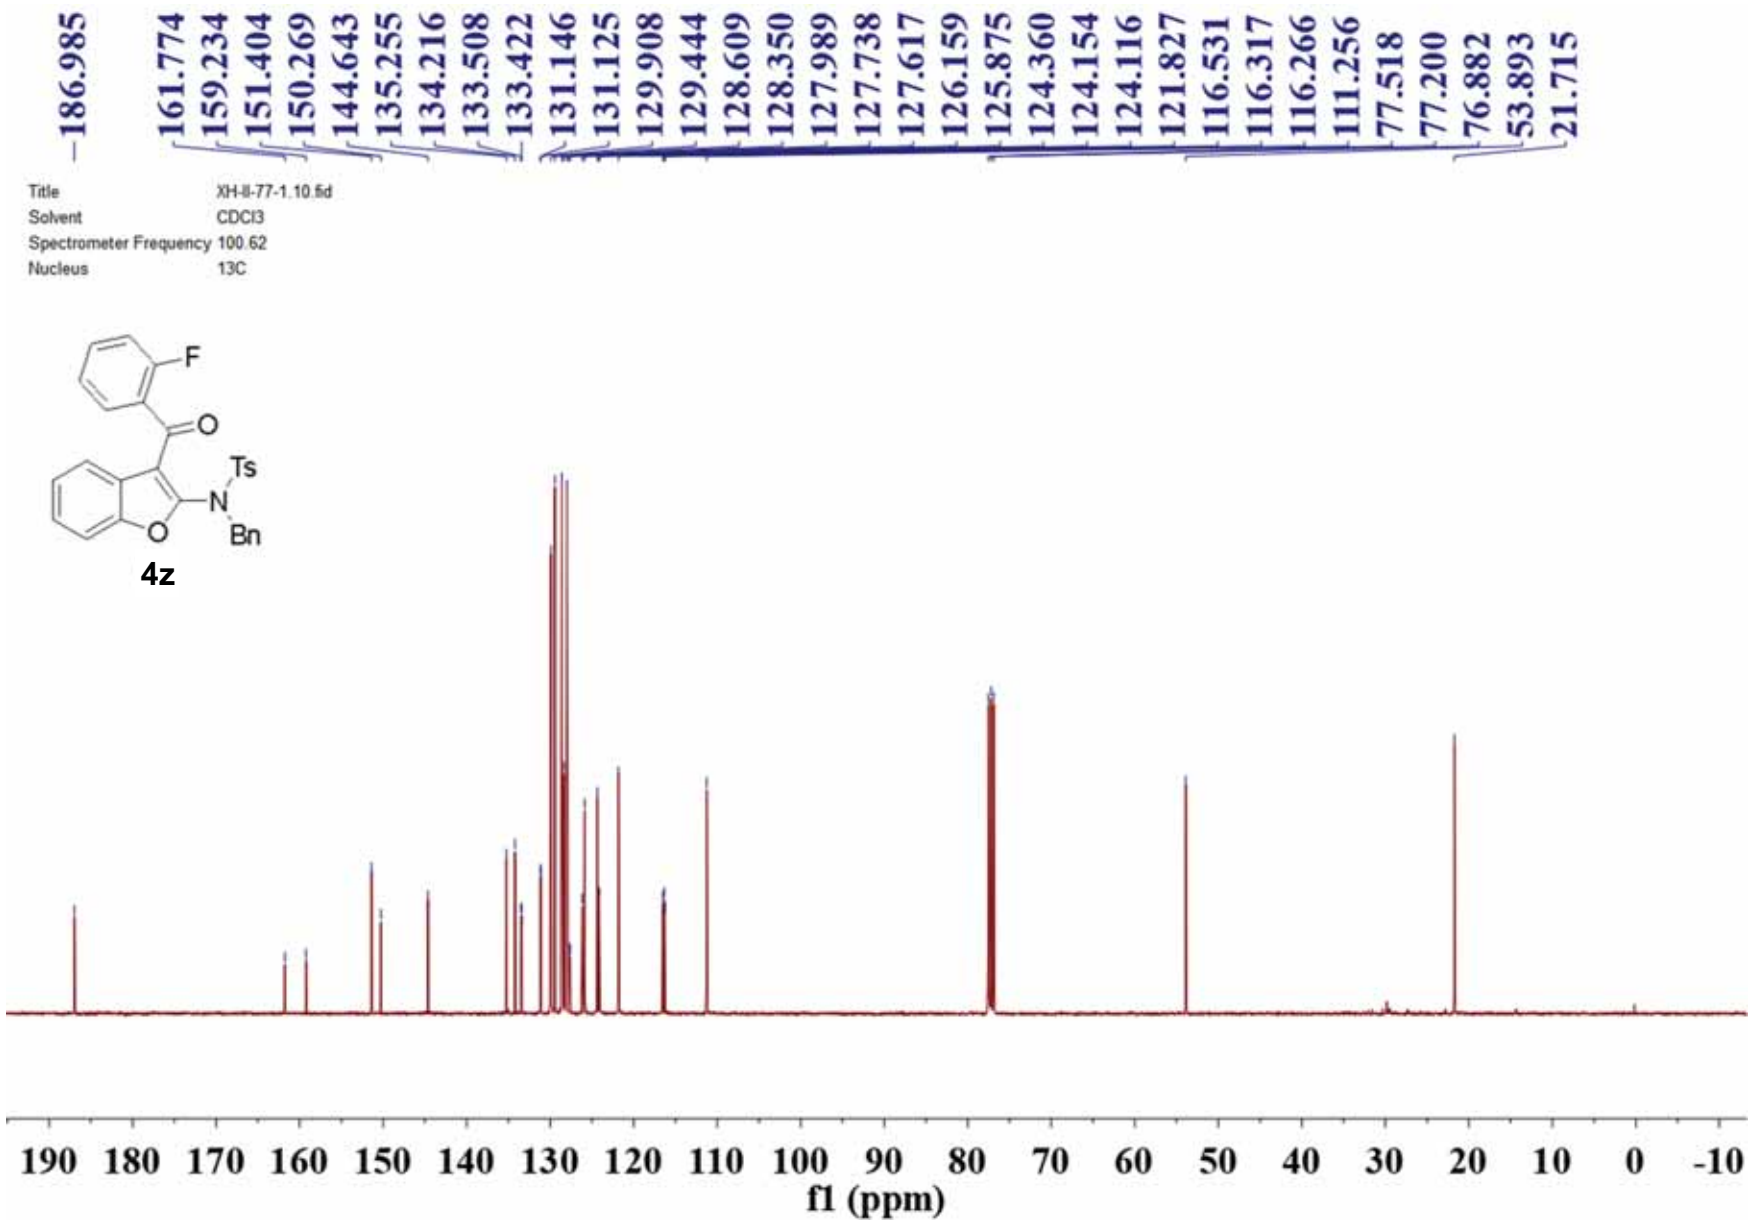

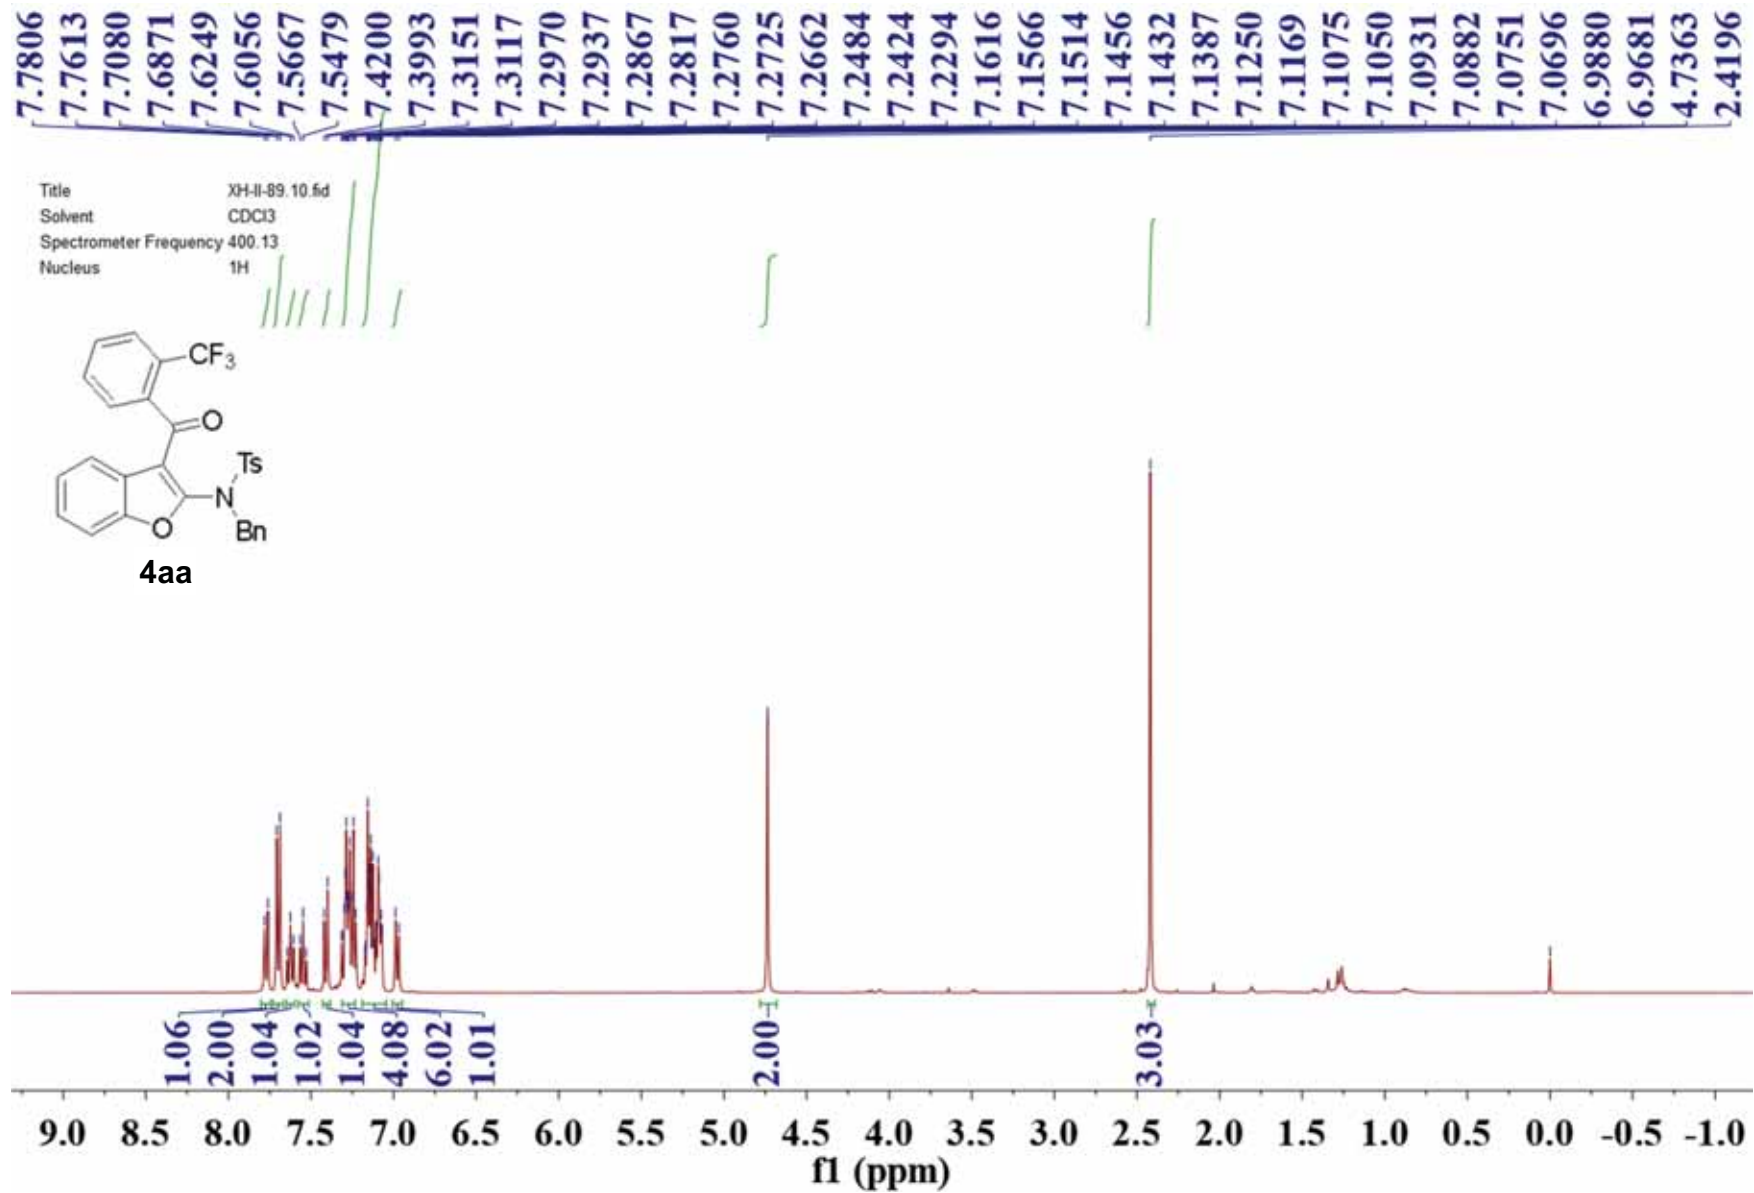

189.046  
 152.029  
 151.463  
 144.760  
 138.859  
 138.839  
 138.819  
 138.800  
 135.570  
 134.312  
 131.903  
 130.407  
 129.902  
 128.922  
 128.761  
 128.636  
 128.291  
 128.269  
 128.247  
 127.926  
 127.605  
 127.283  
 127.028  
 126.980  
 126.931  
 126.884  
 126.019  
 125.666  
 125.022  
 124.474  
 122.298  
 121.766  
 119.571  
 115.189  
 111.482  
 77.518  
 77.200  
 76.882  
 53.956  
 21.768

Title XH-II-89/ 10  
 Solvent CDCl<sub>3</sub>  
 Spectrometer Frequency 100.62  
 Nucleus <sup>13</sup>C

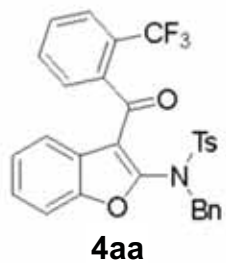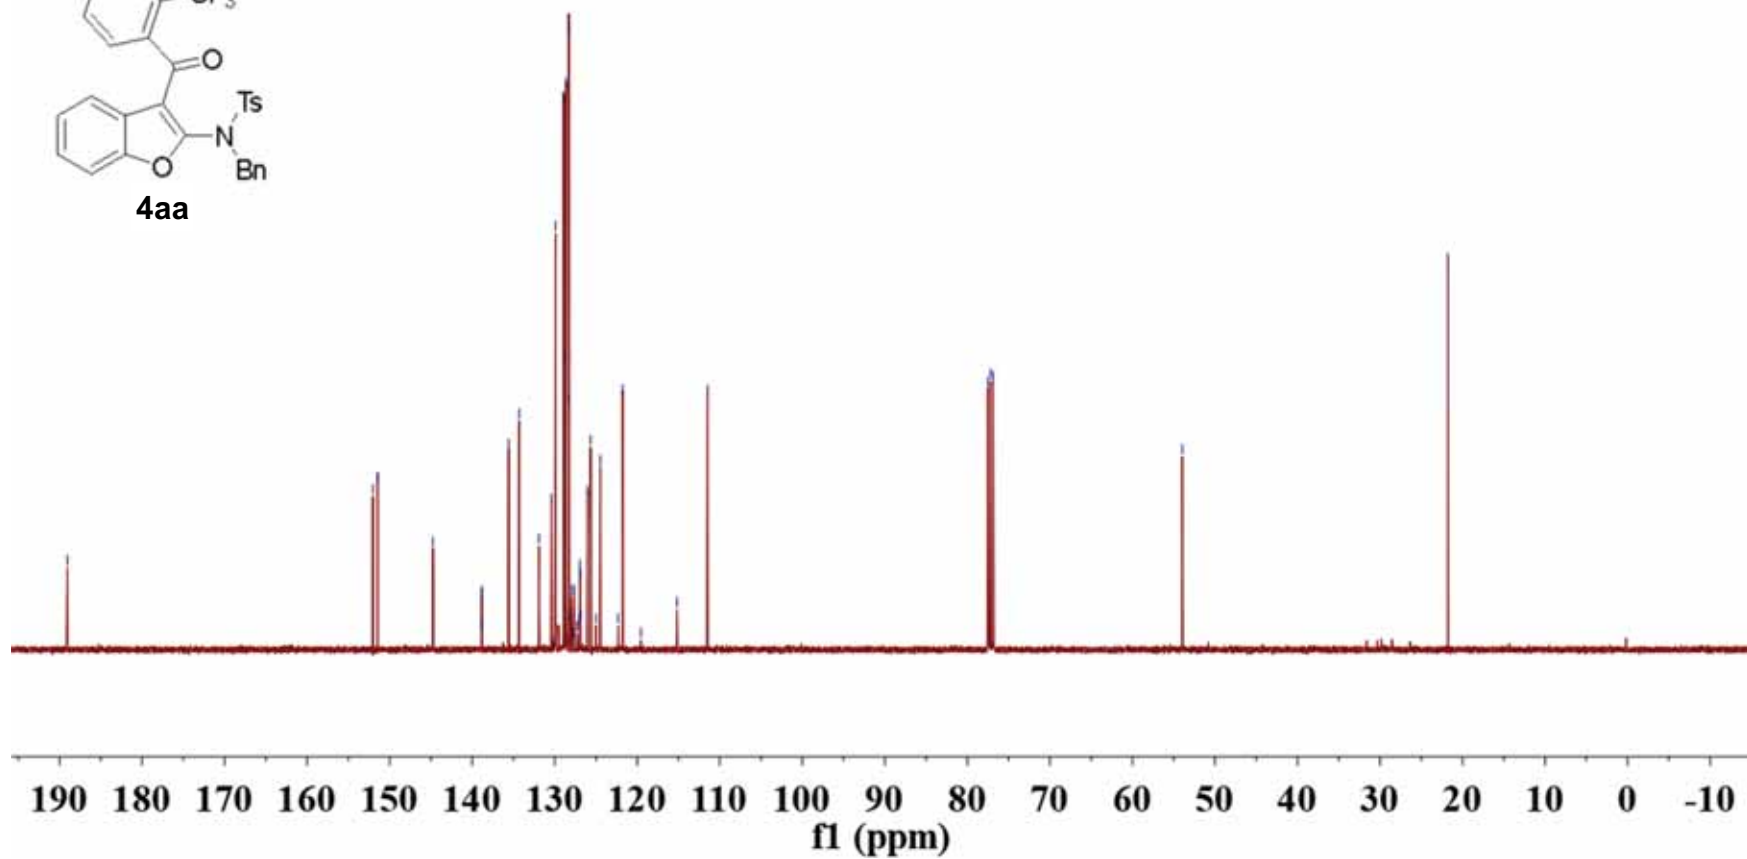

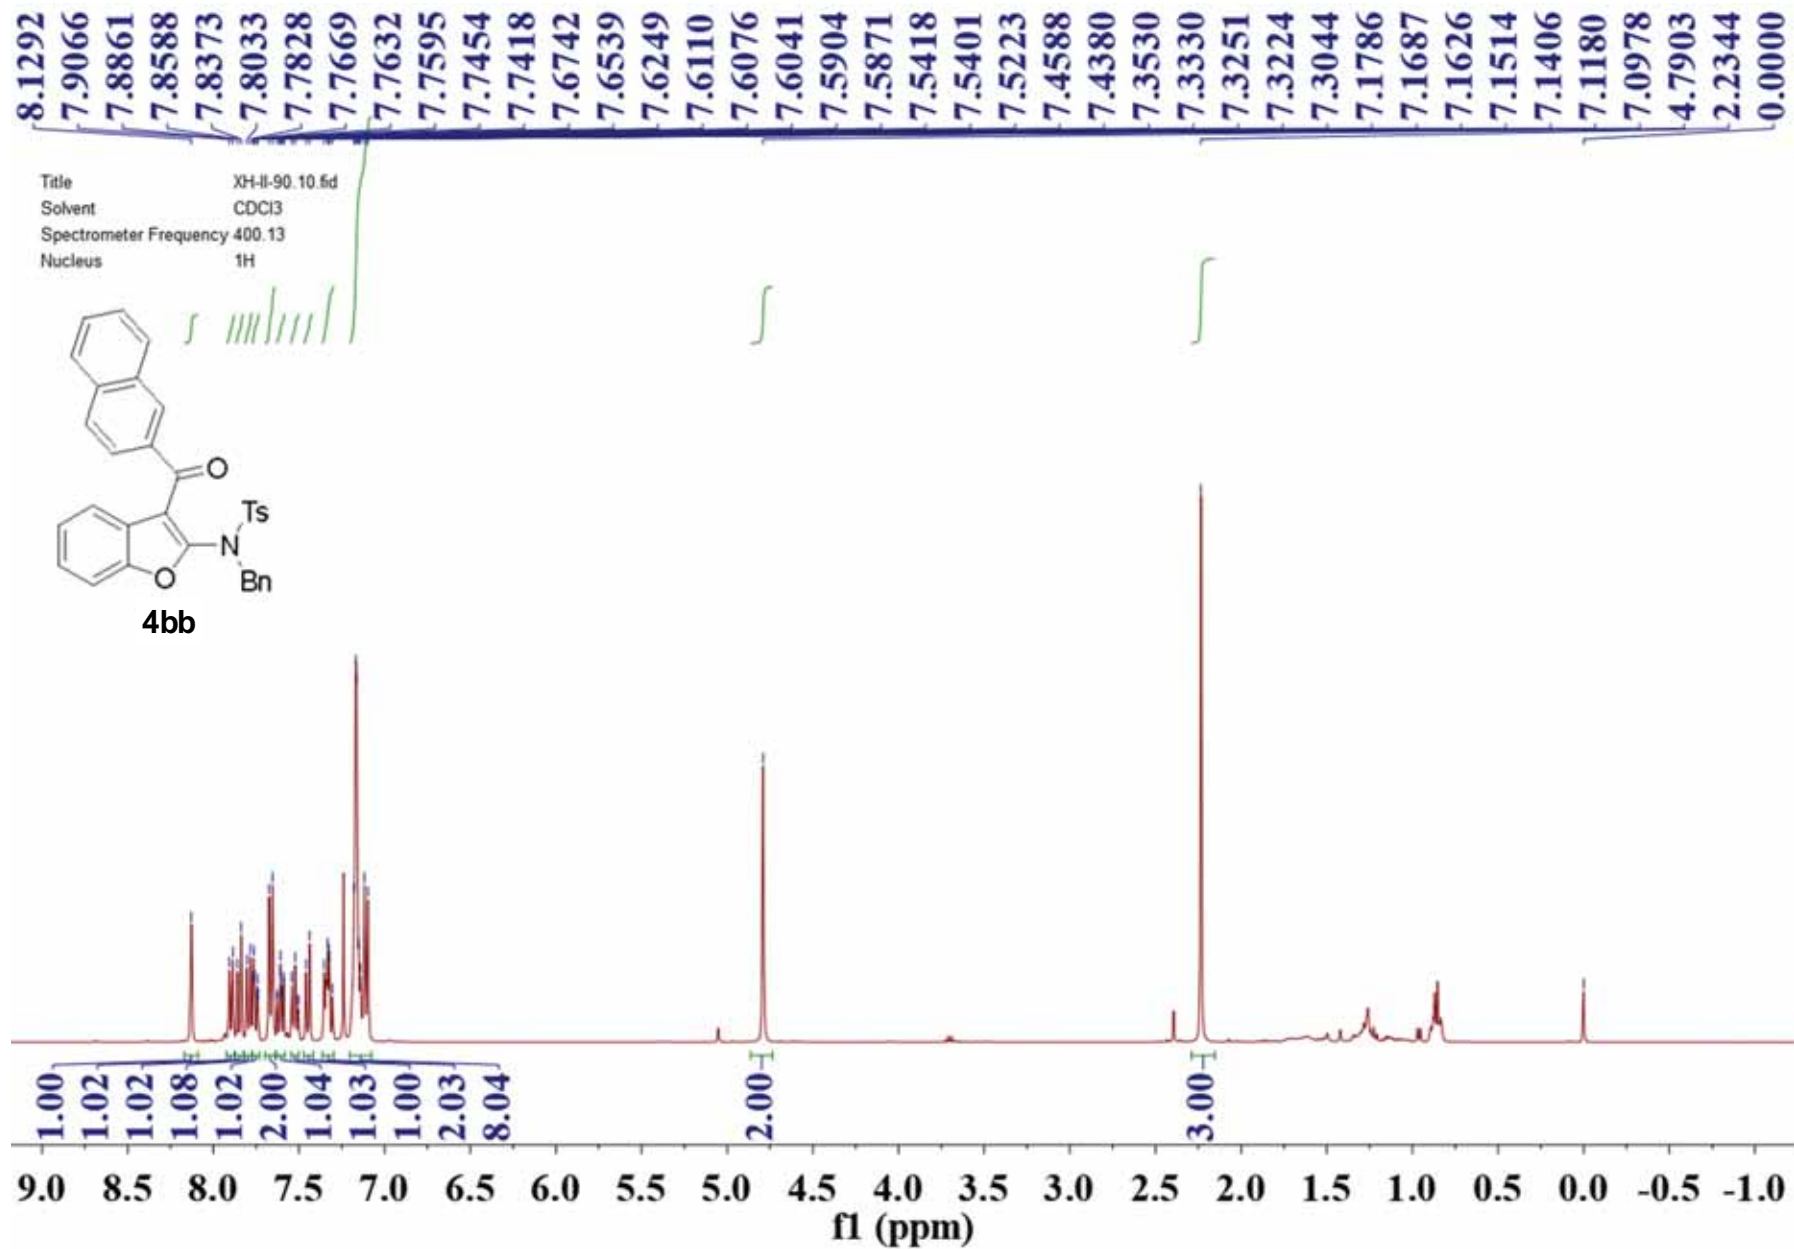

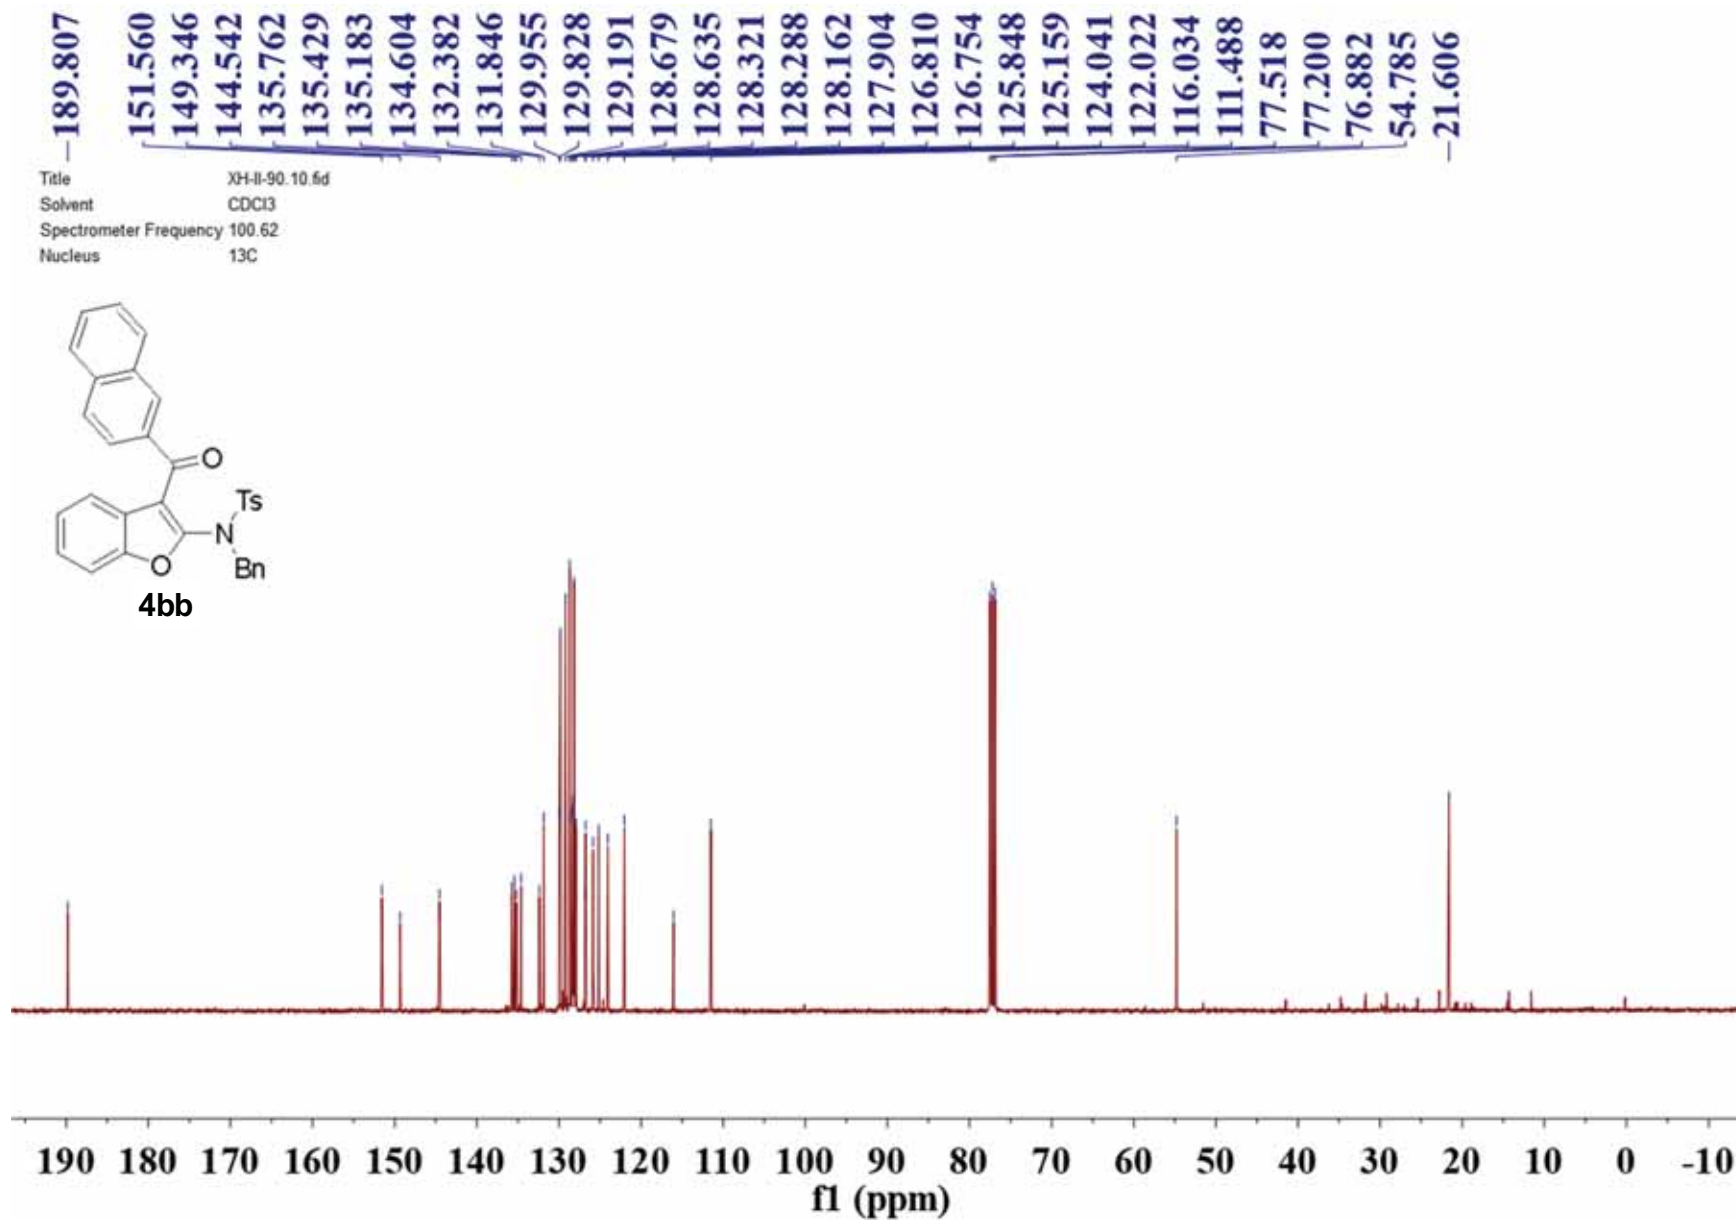

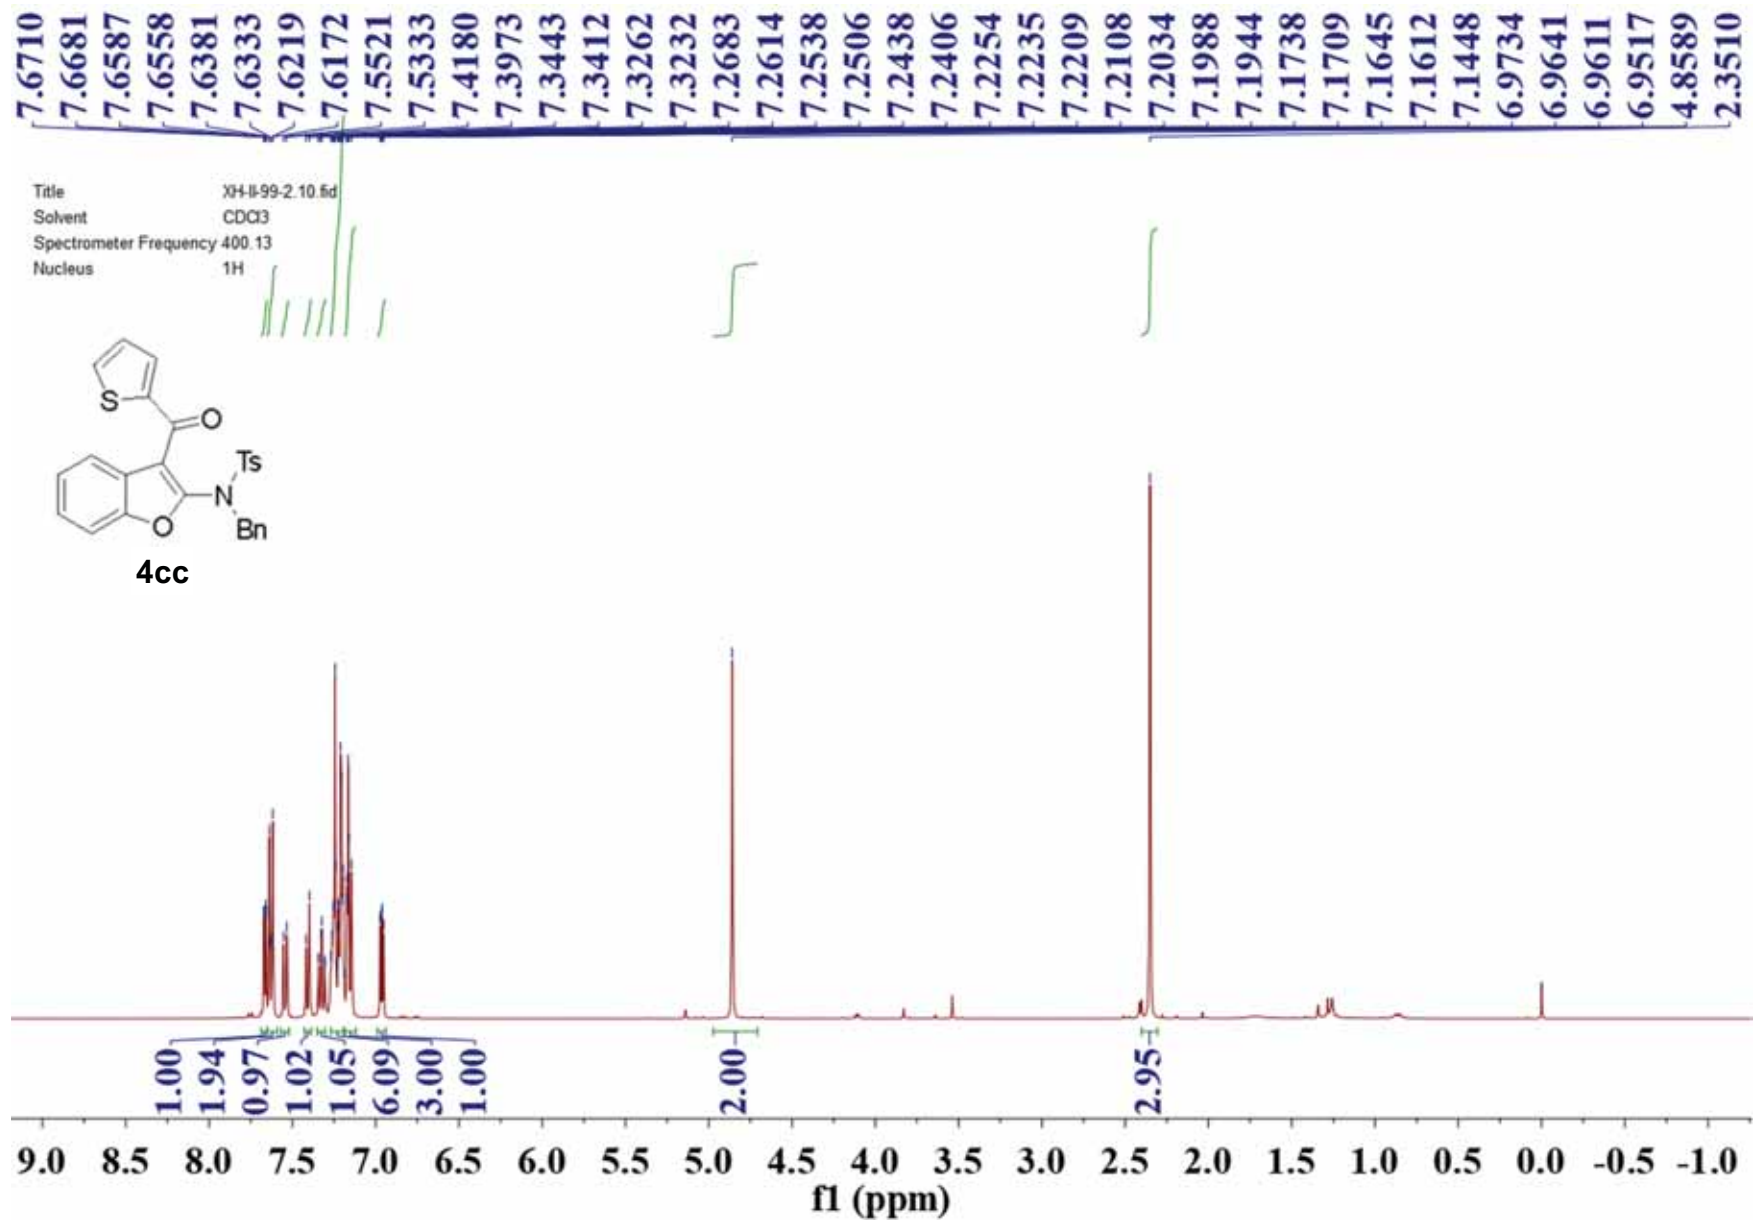

181.391  
 151.514  
 148.307  
 144.571  
 144.258  
 135.376  
 135.038  
 134.581  
 134.523  
 129.844  
 129.340  
 128.672  
 128.375  
 128.039  
 127.957  
 126.482  
 125.932  
 123.984  
 121.795  
 115.932  
 111.428  
 77.518  
 77.200  
 76.882  
 -54.750  
 -21.745

Title XH-II-99-2.10.fid  
 Solvent CDCl3  
 Spectrometer Frequency 100.62  
 Nucleus 13C

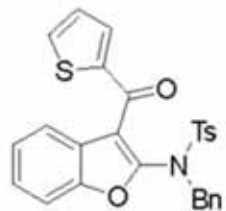

4cc

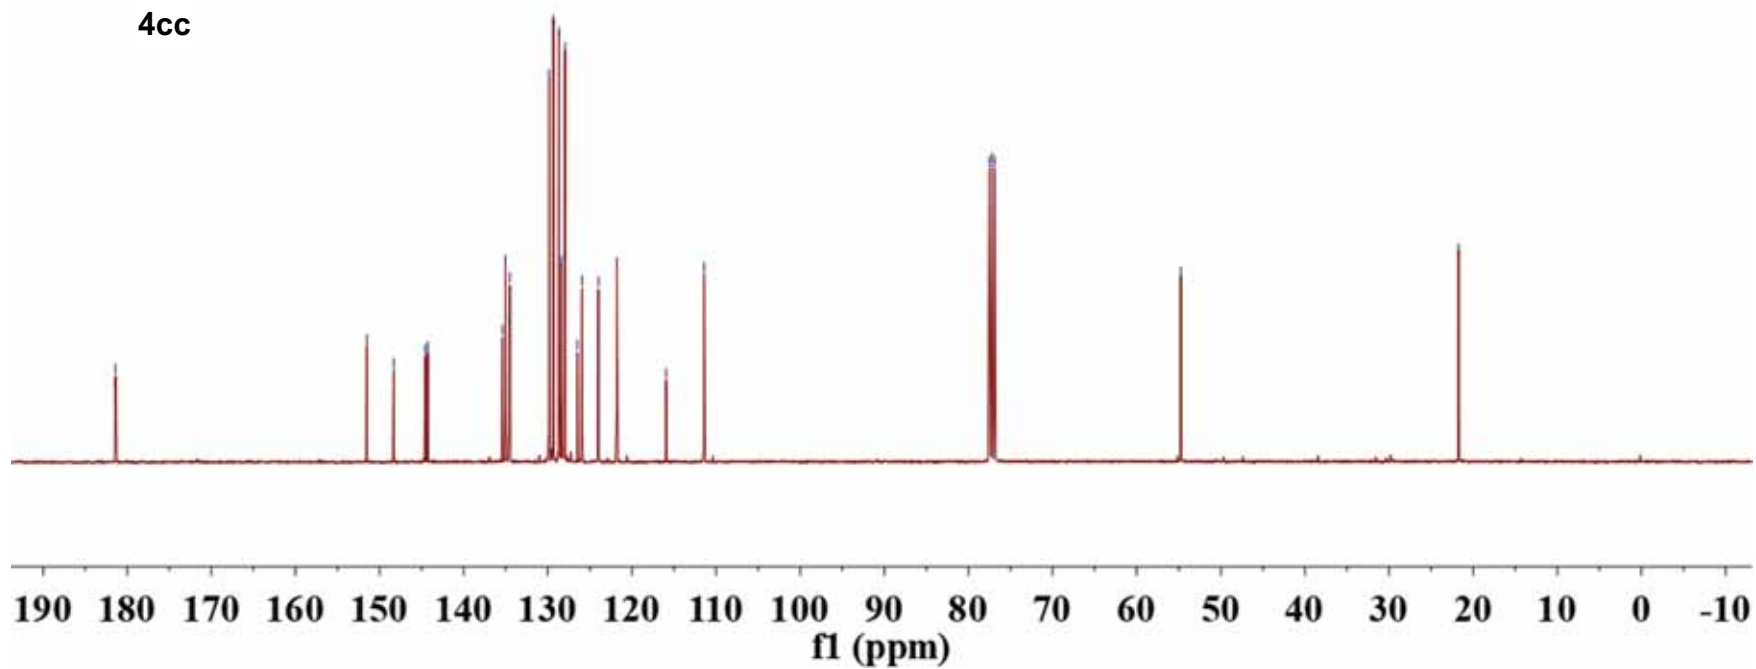



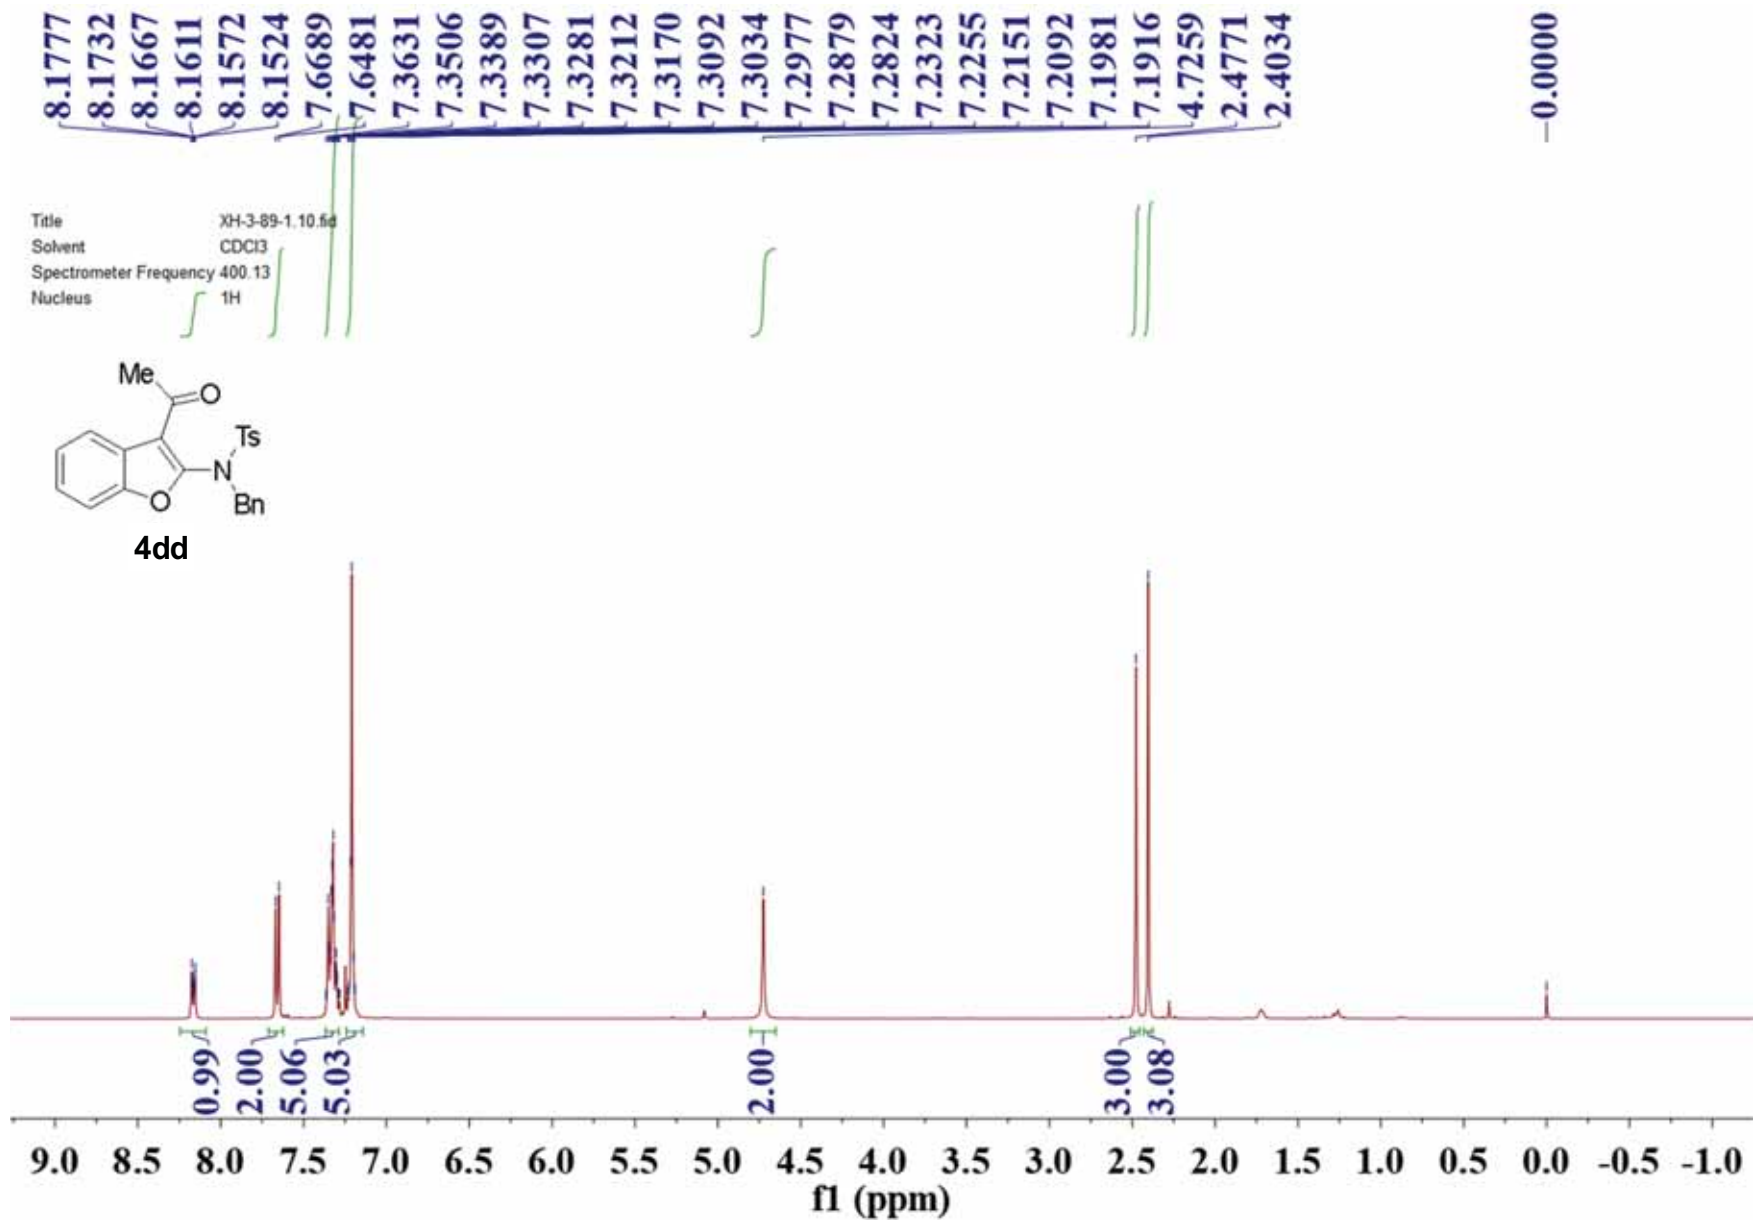

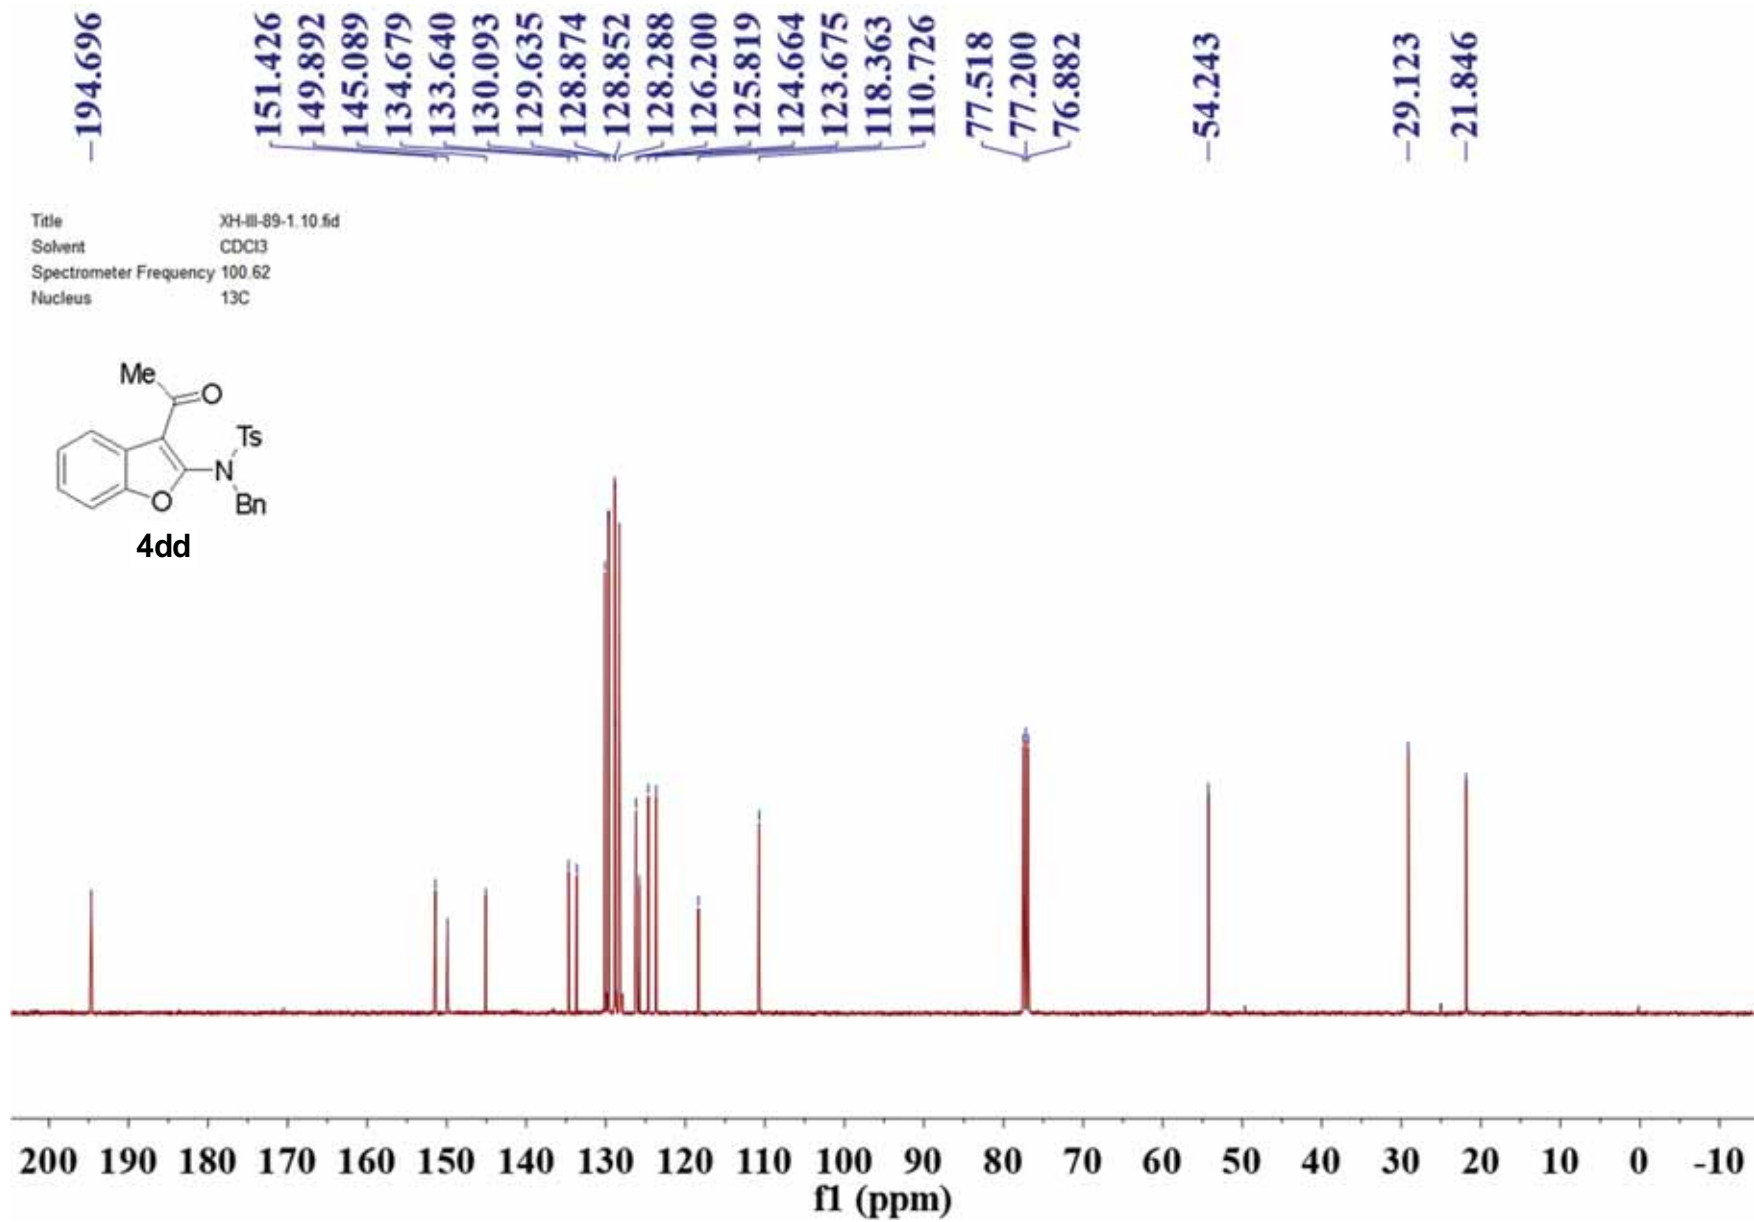

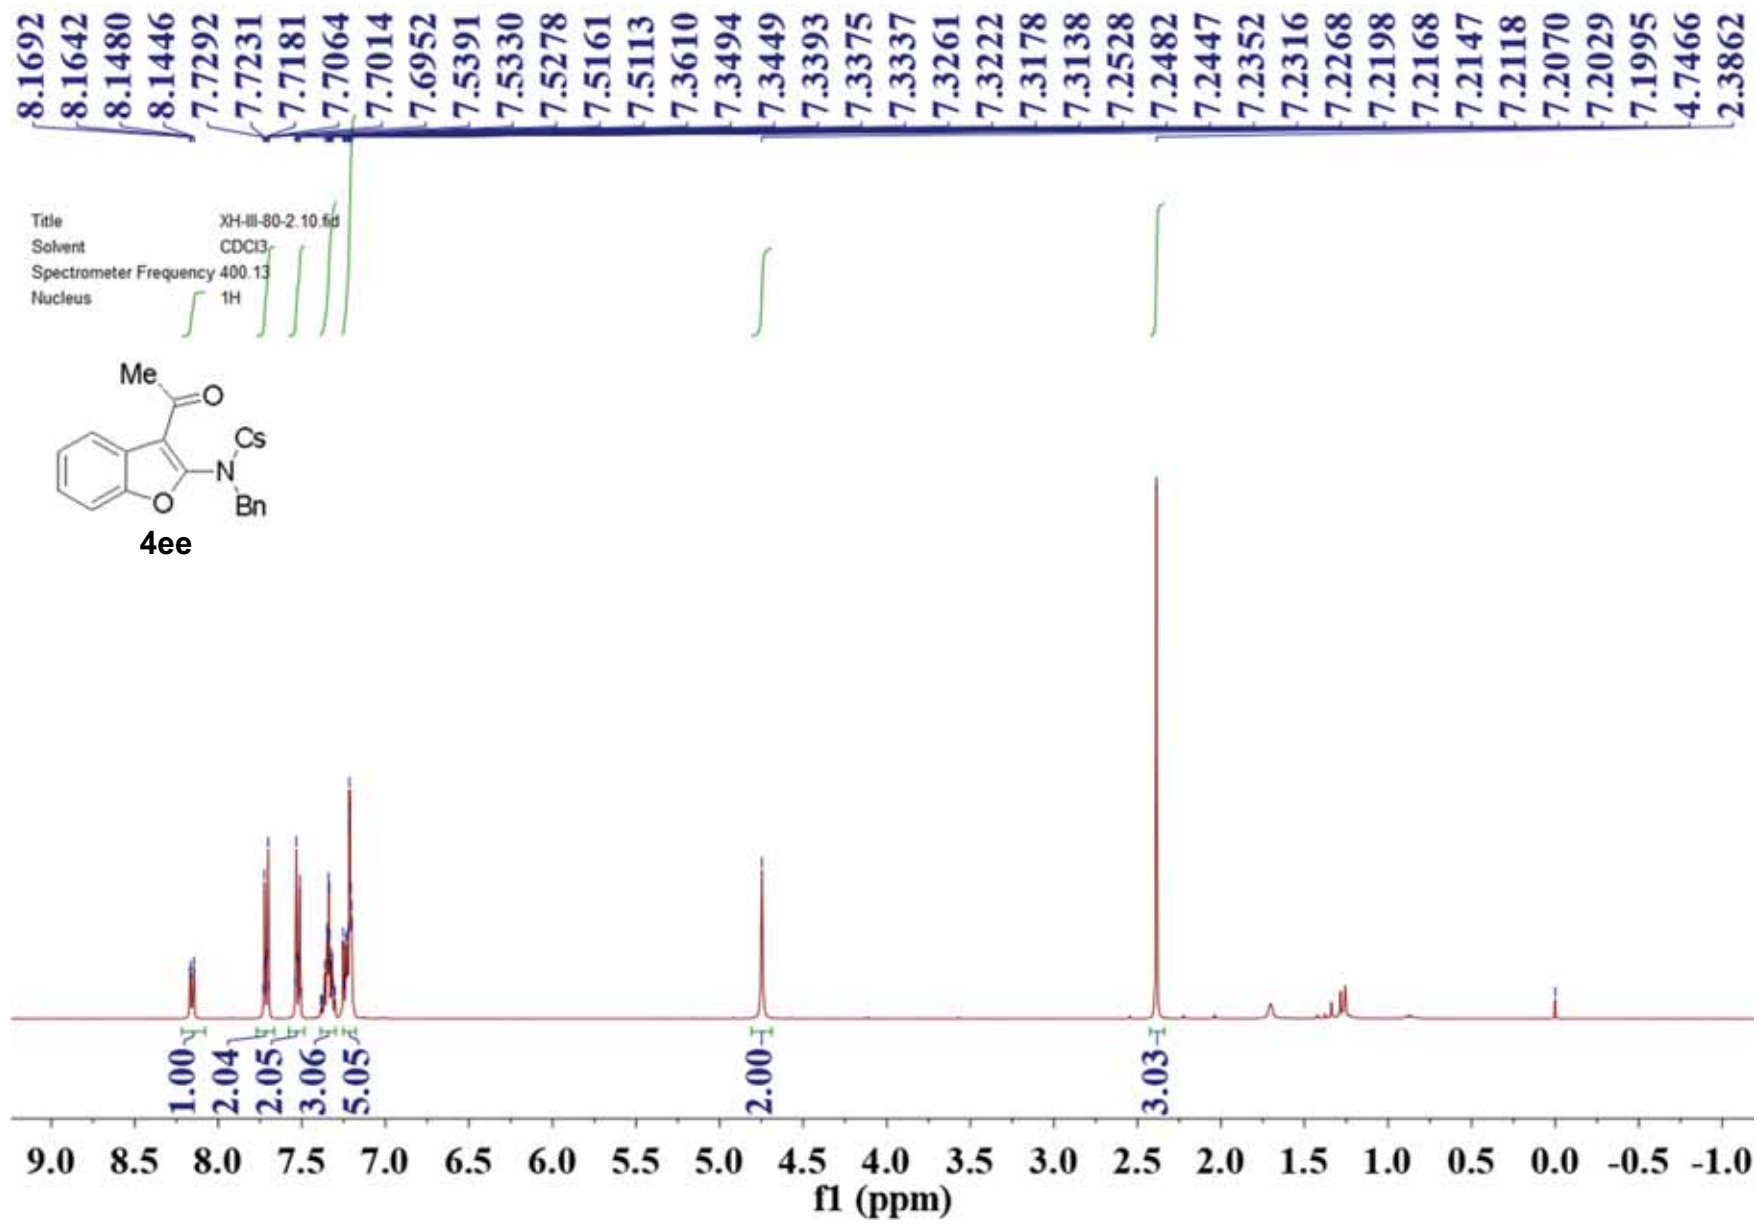

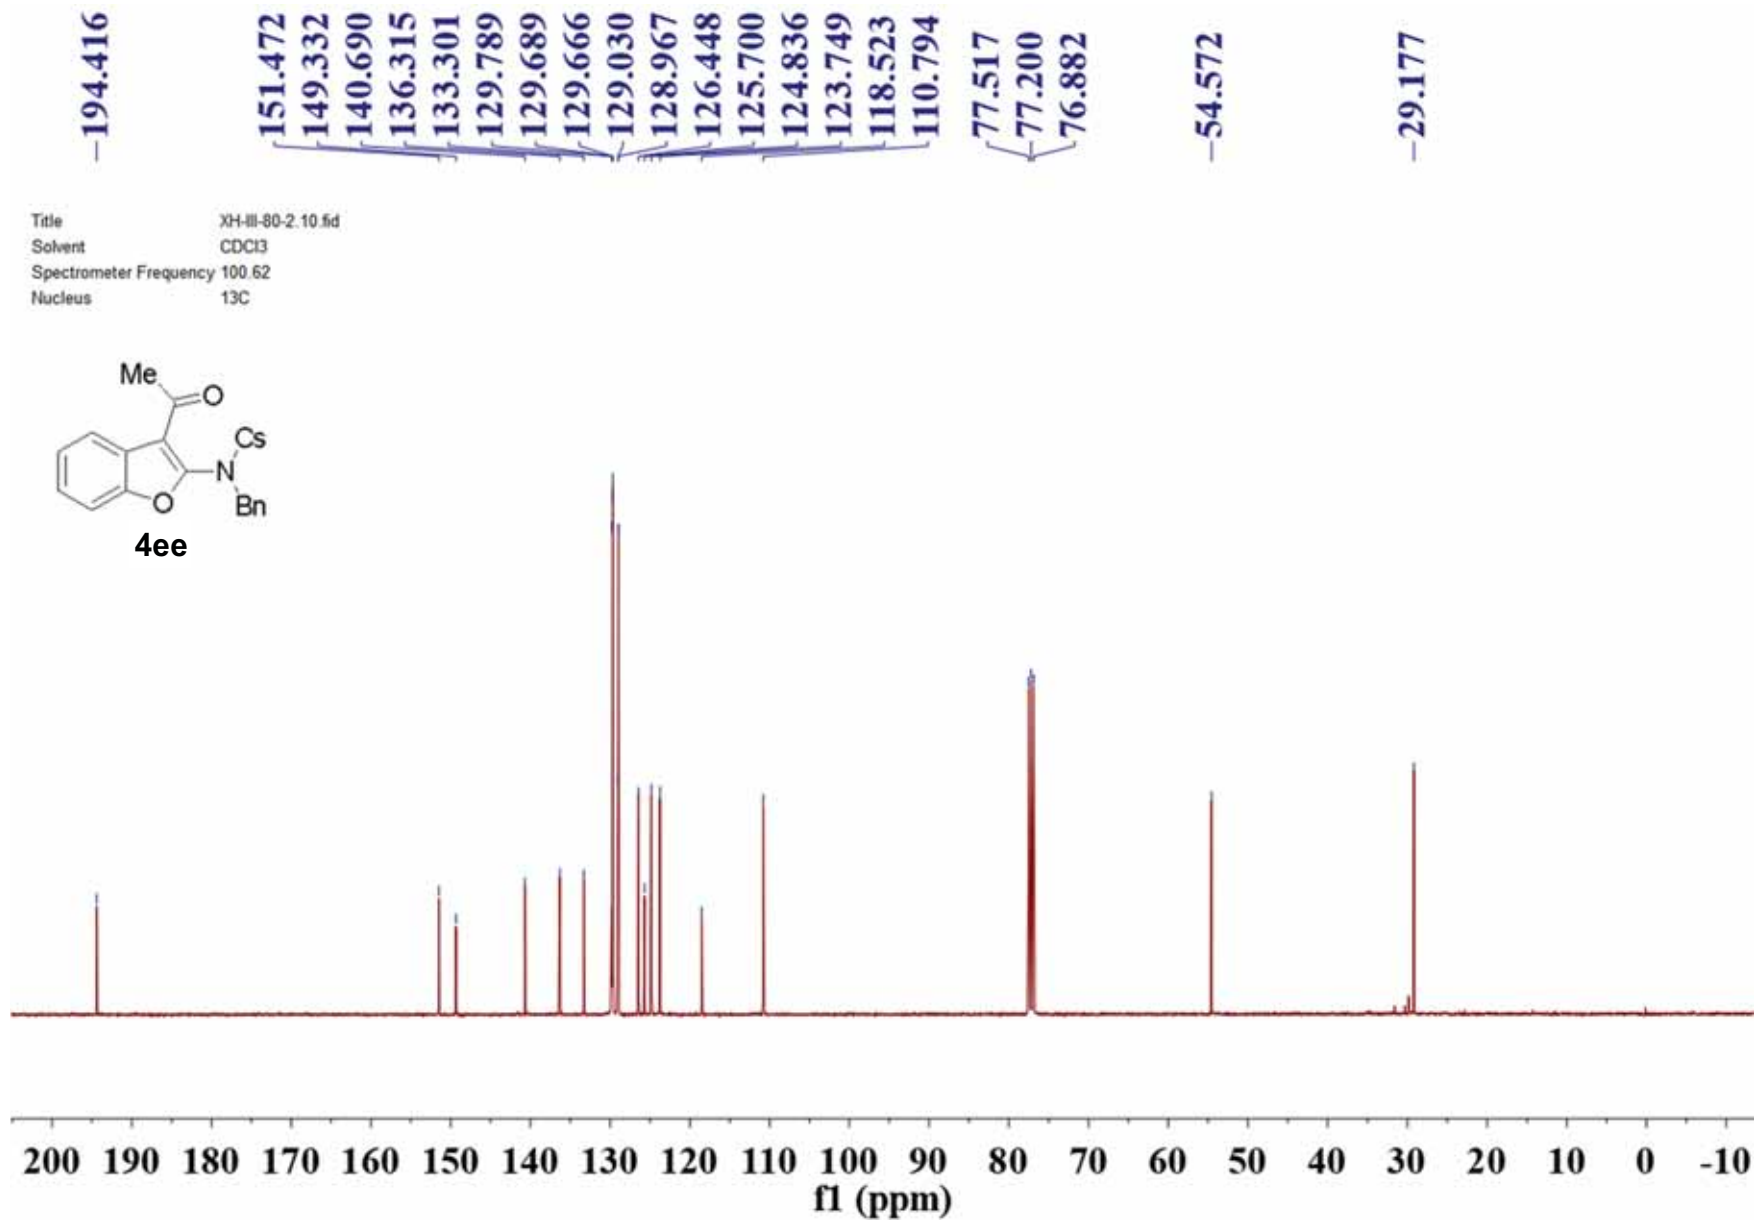

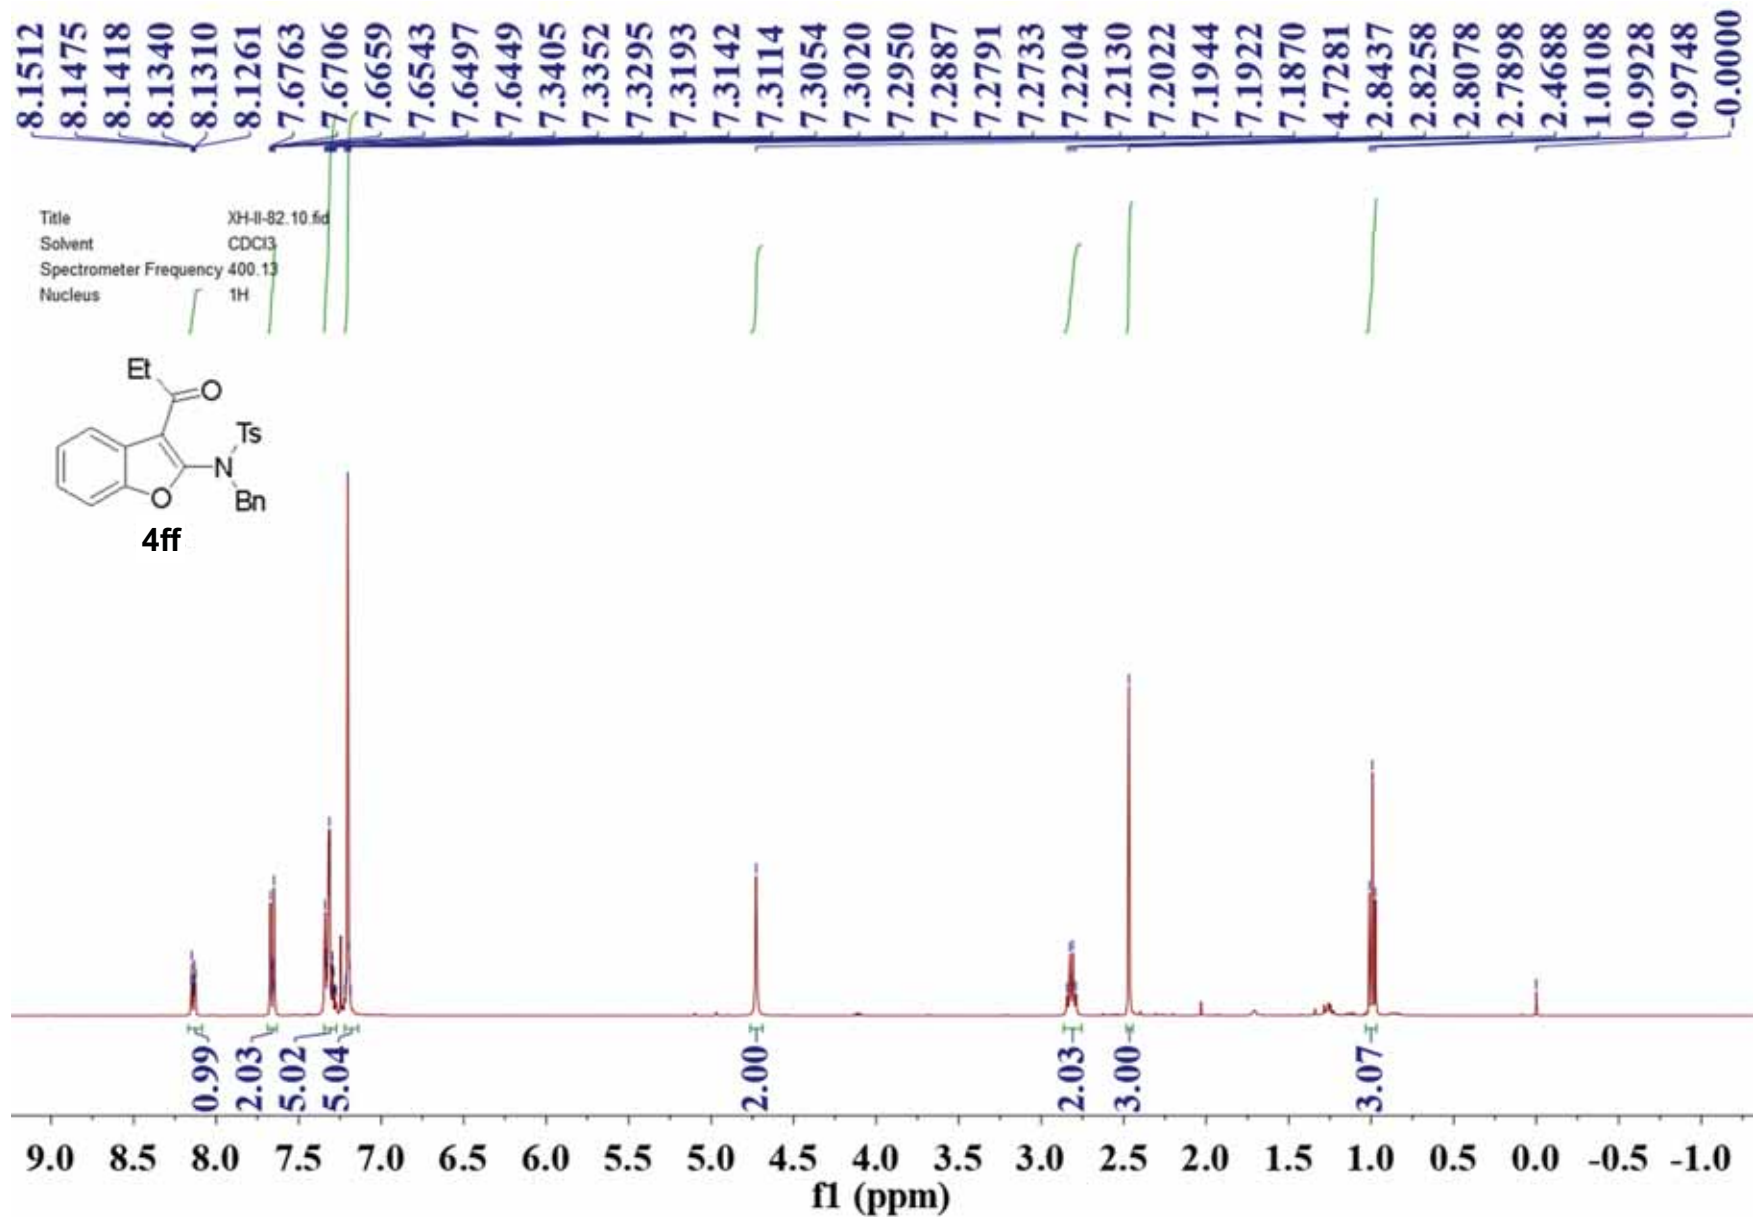

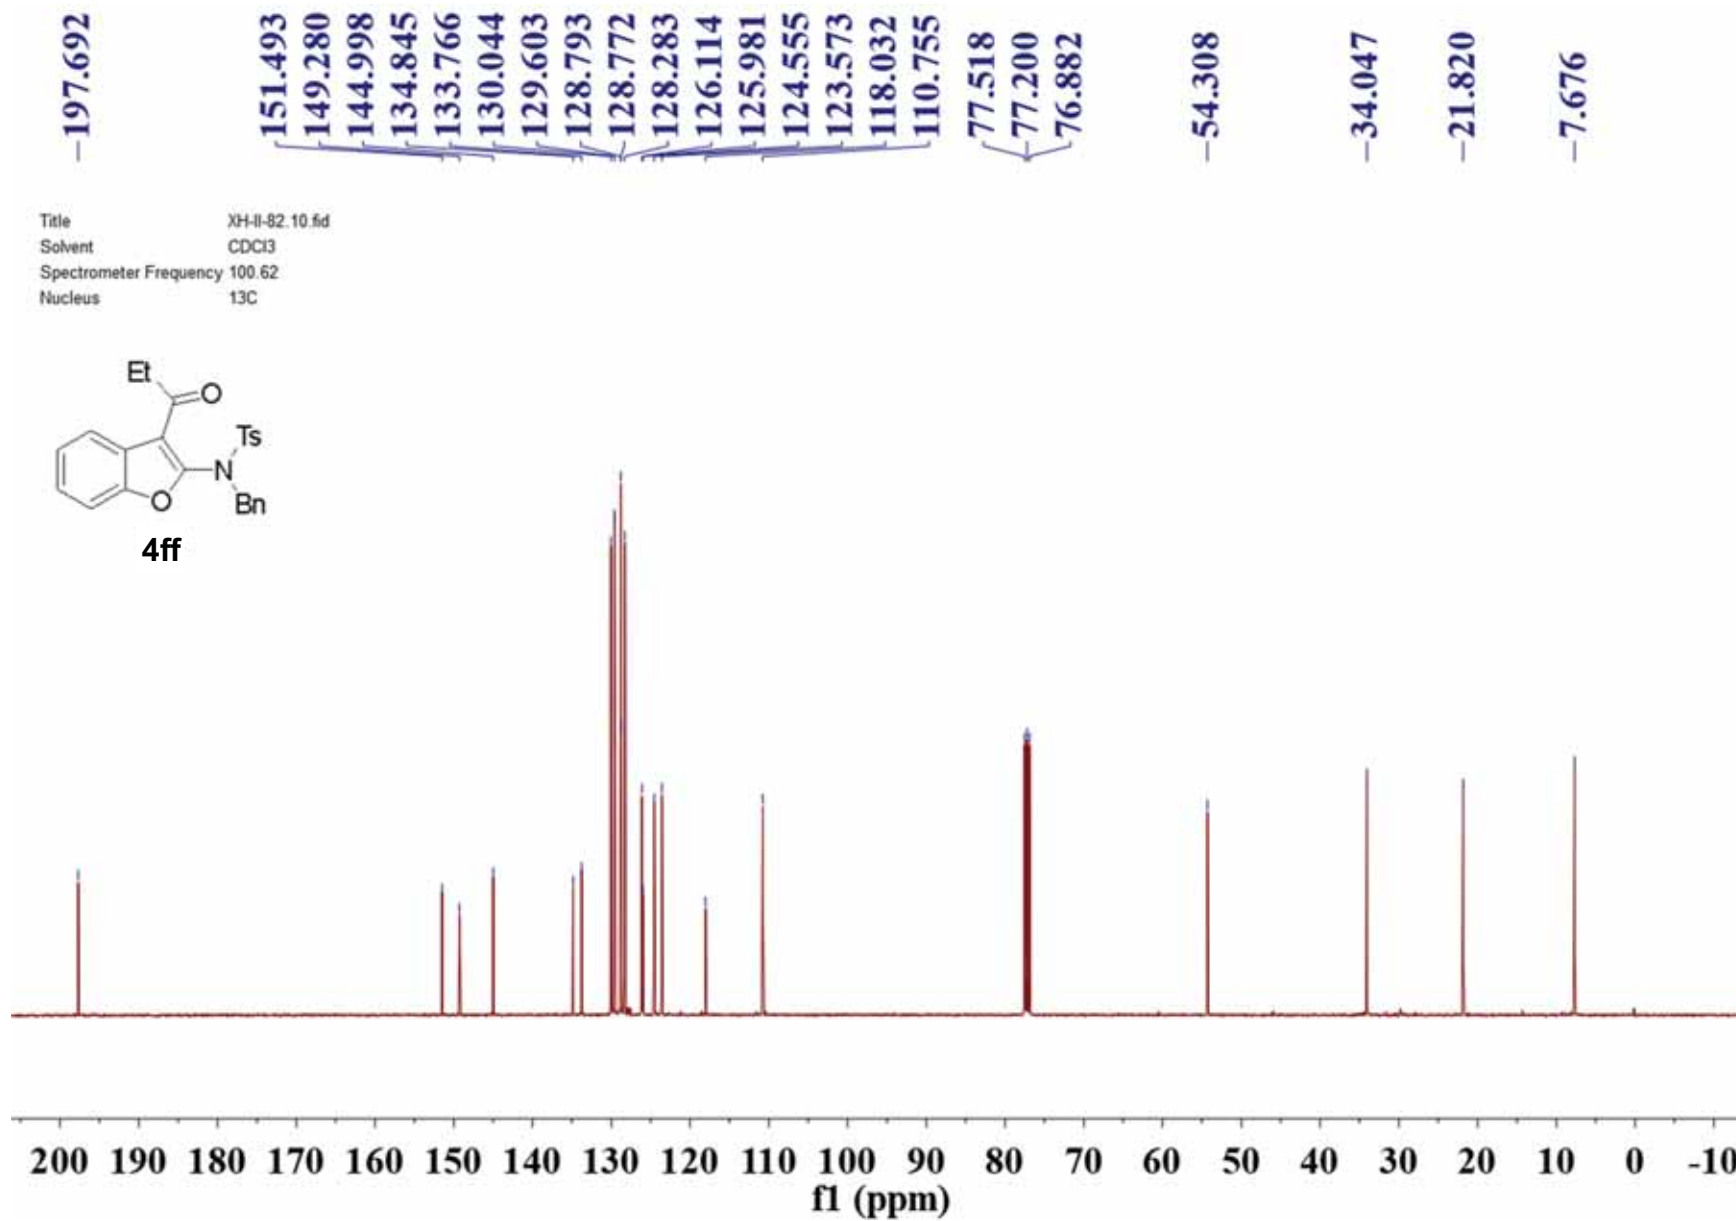

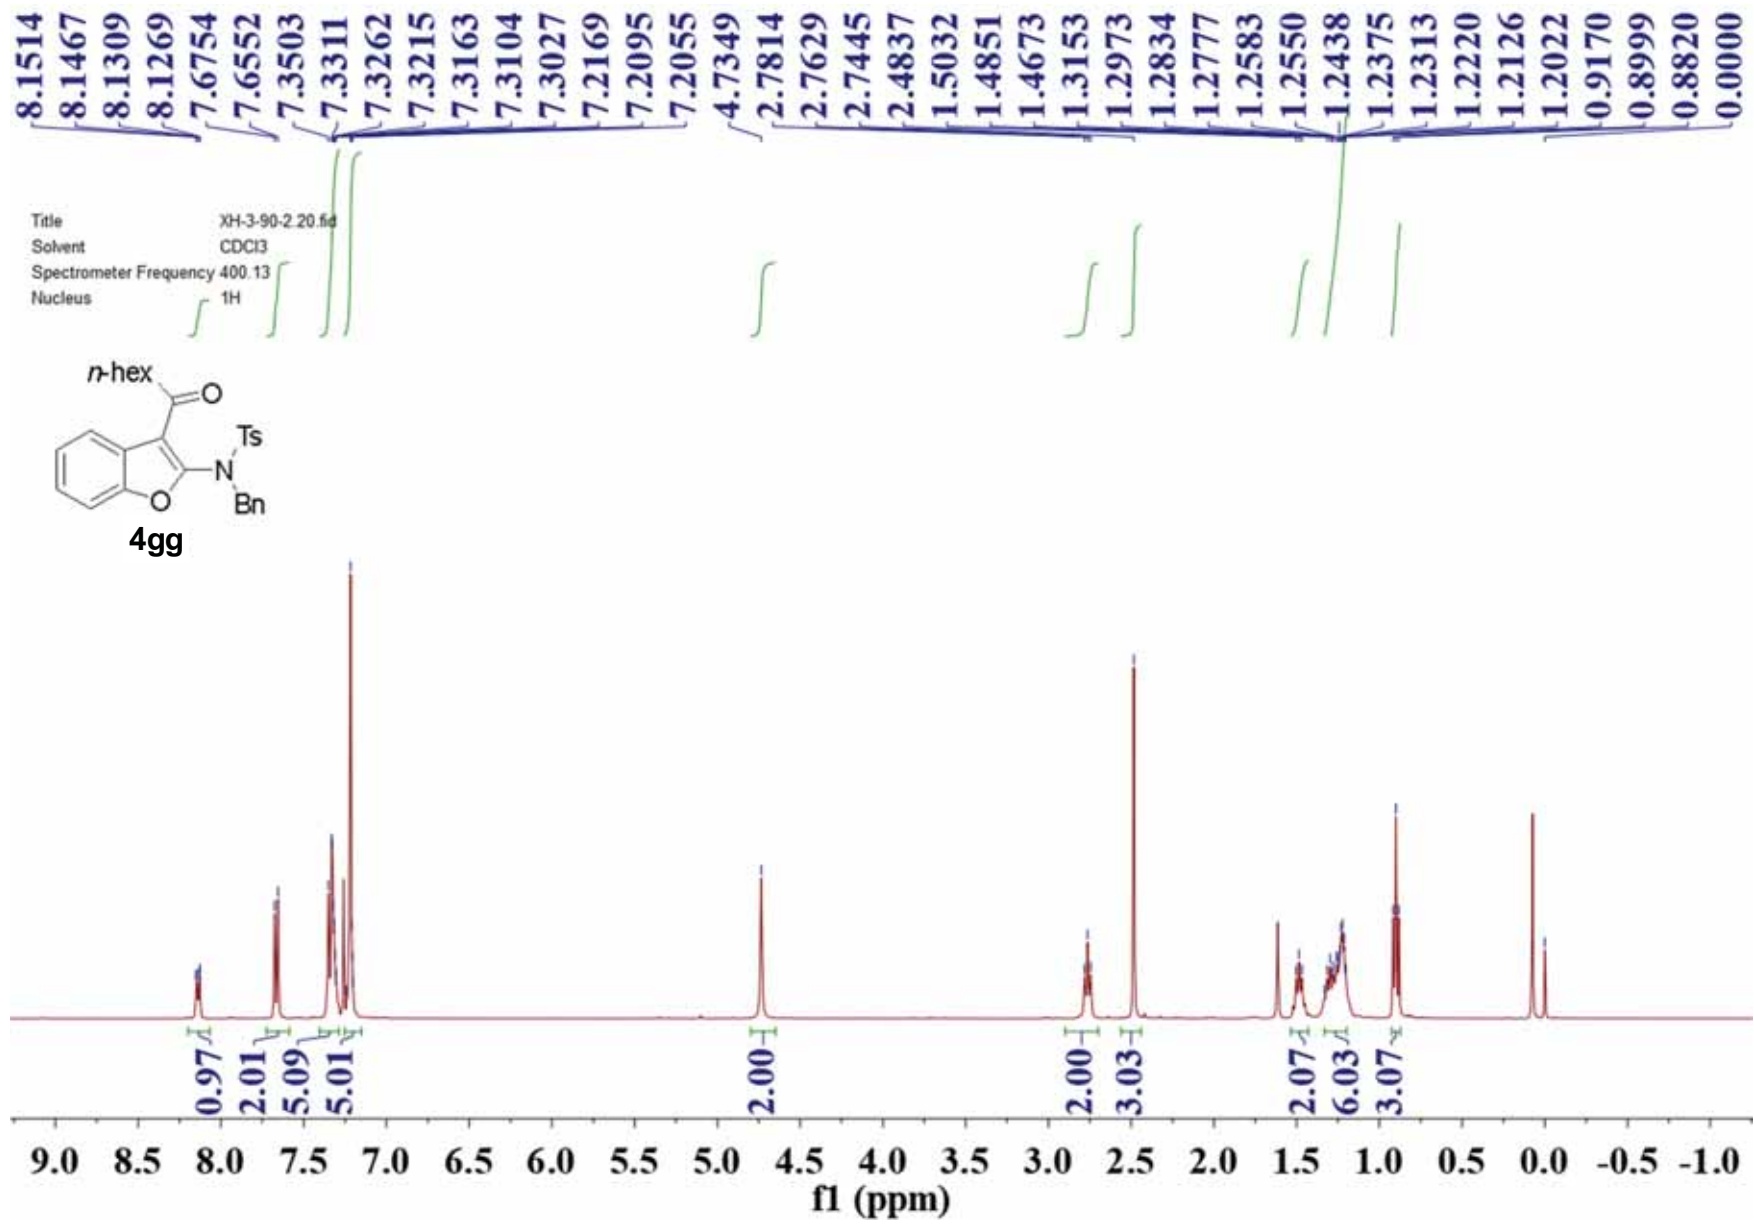

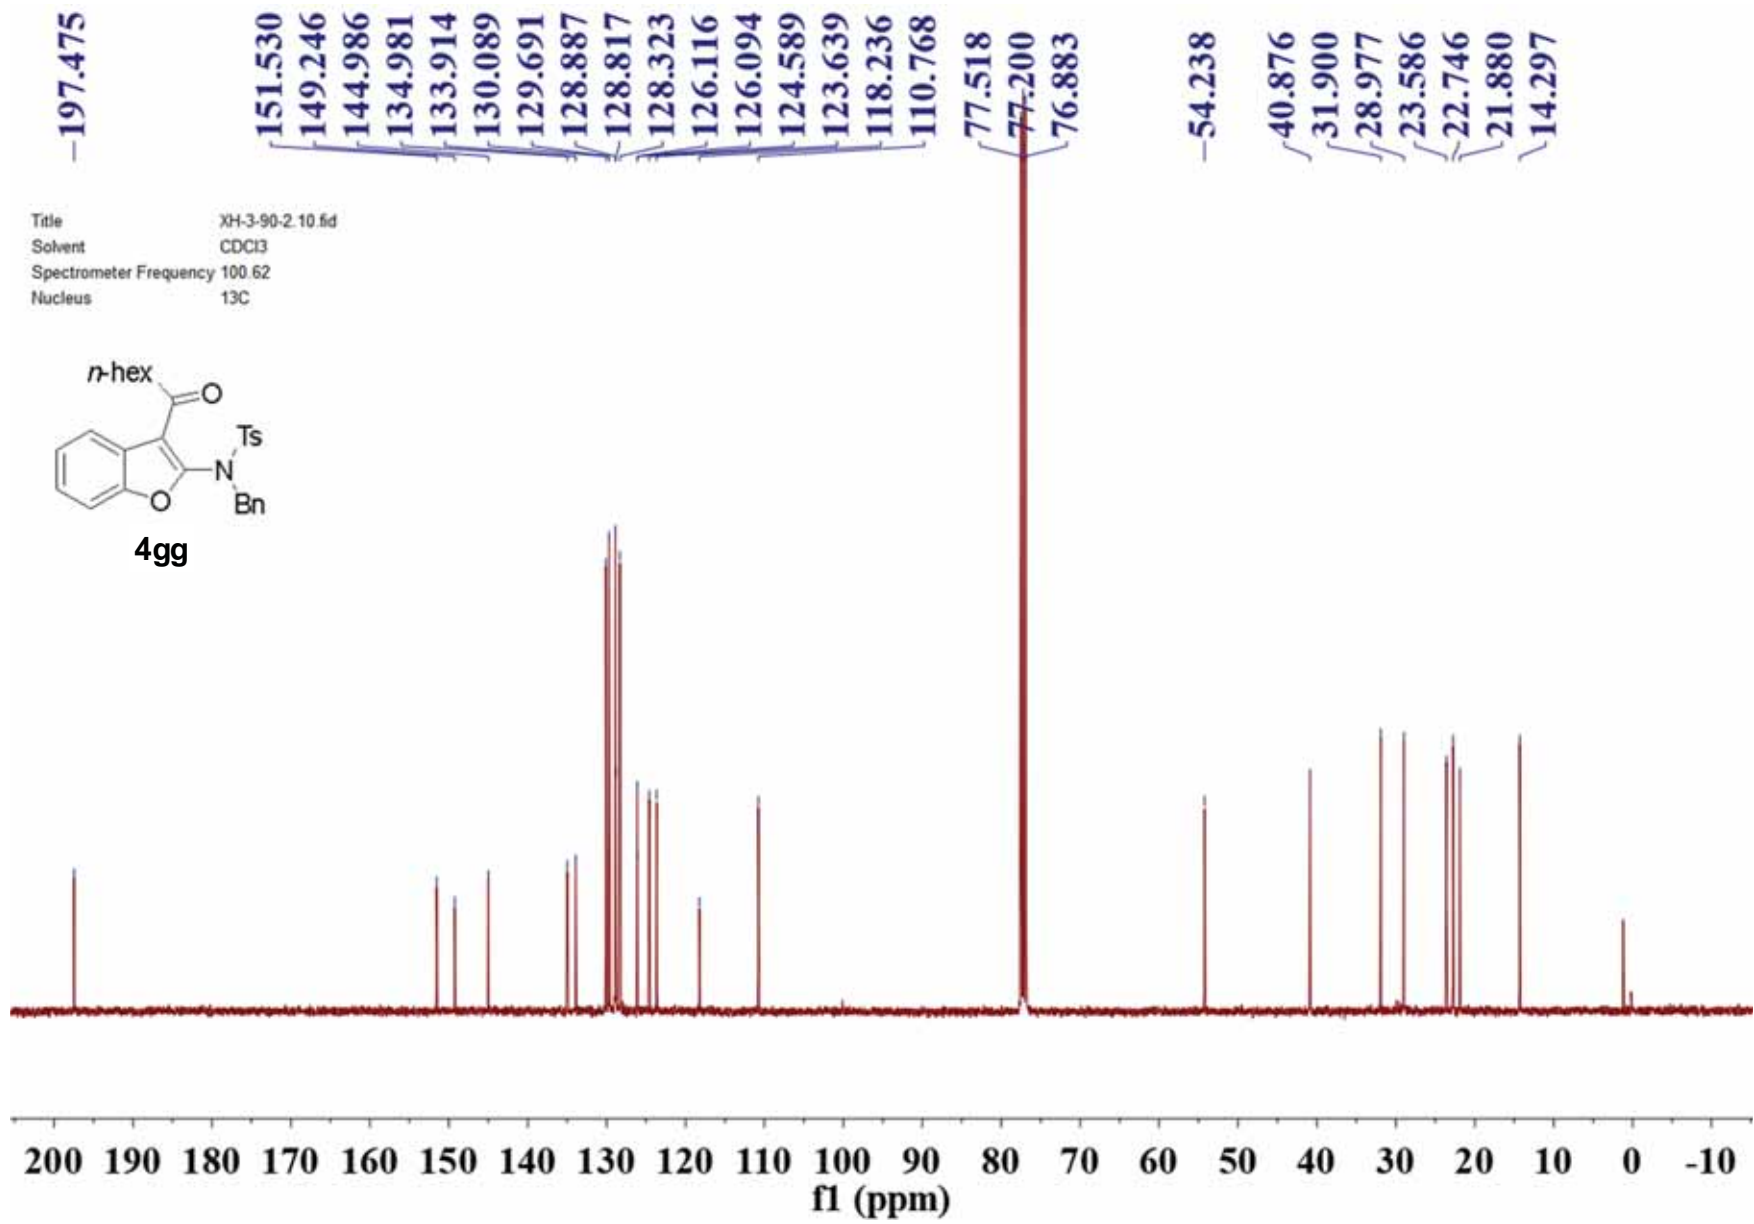



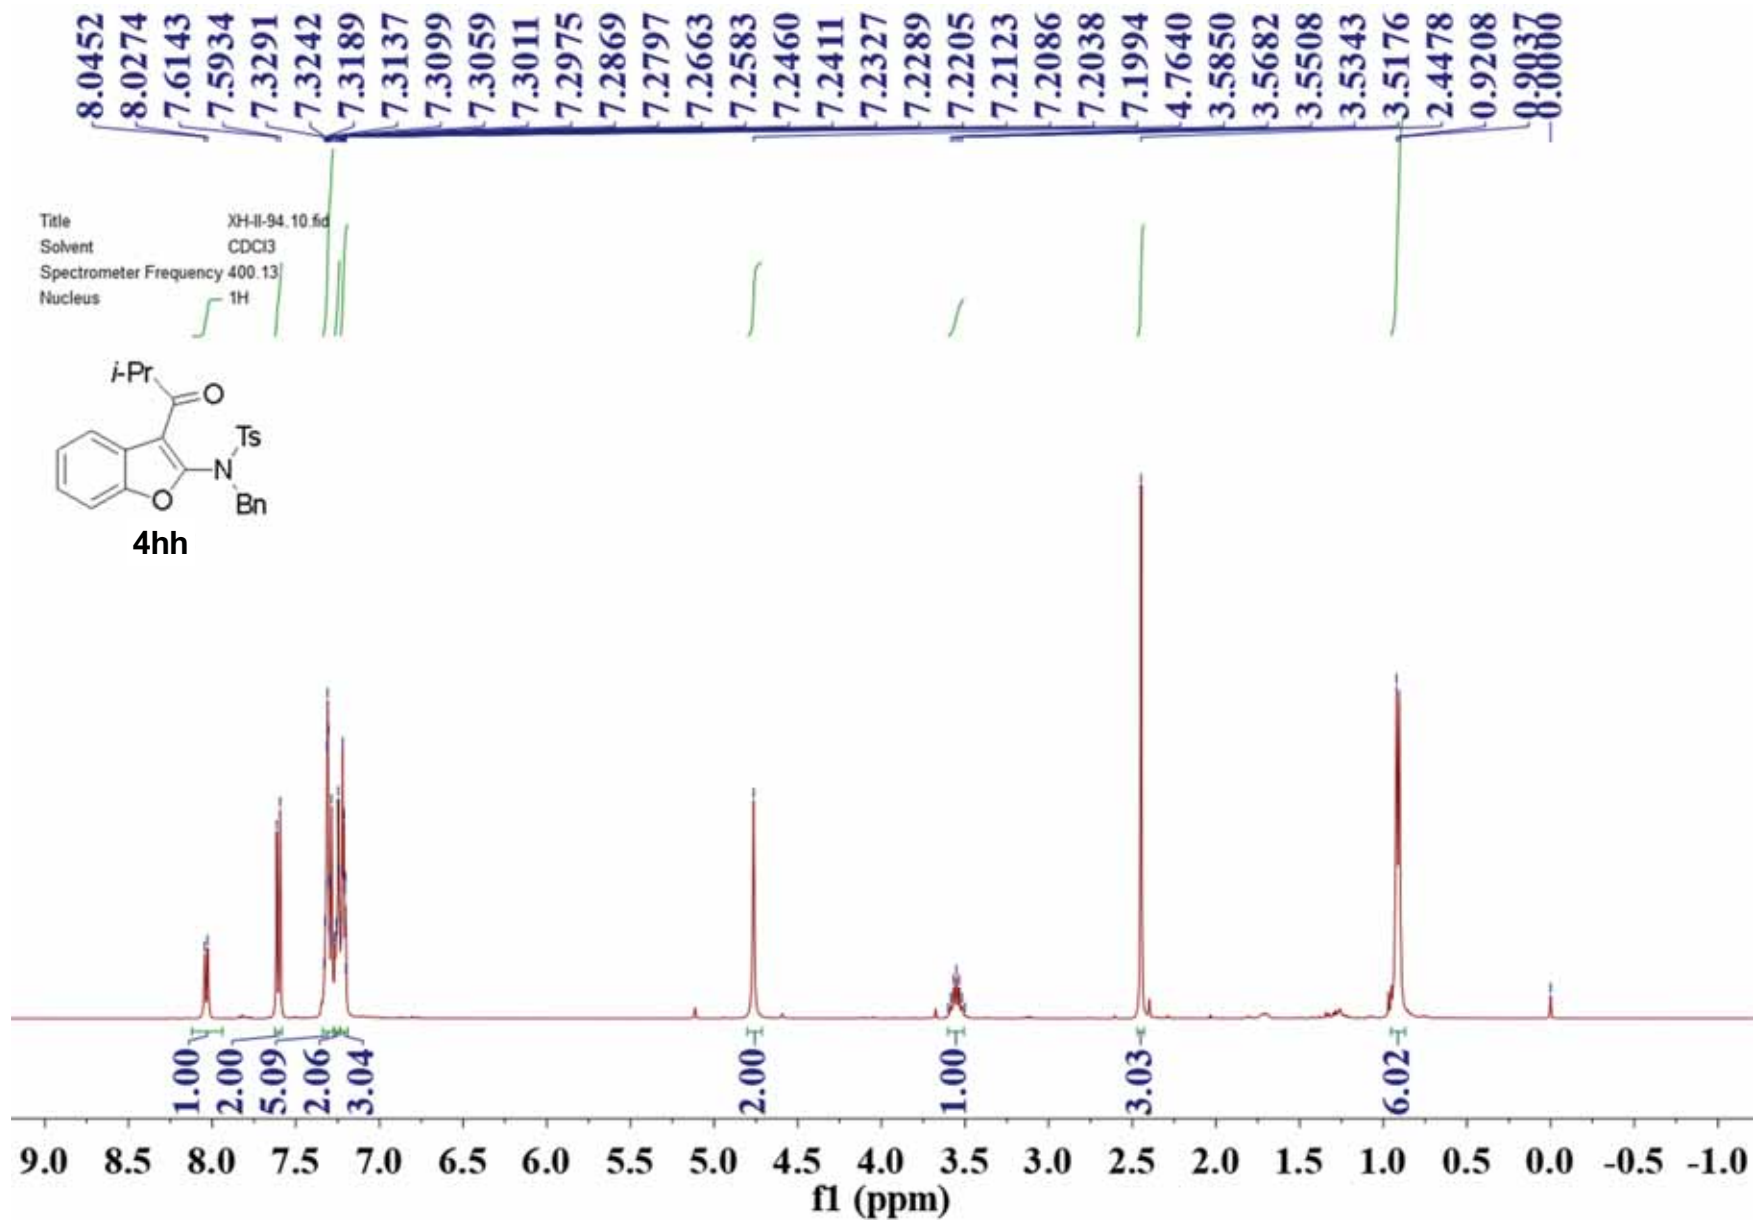

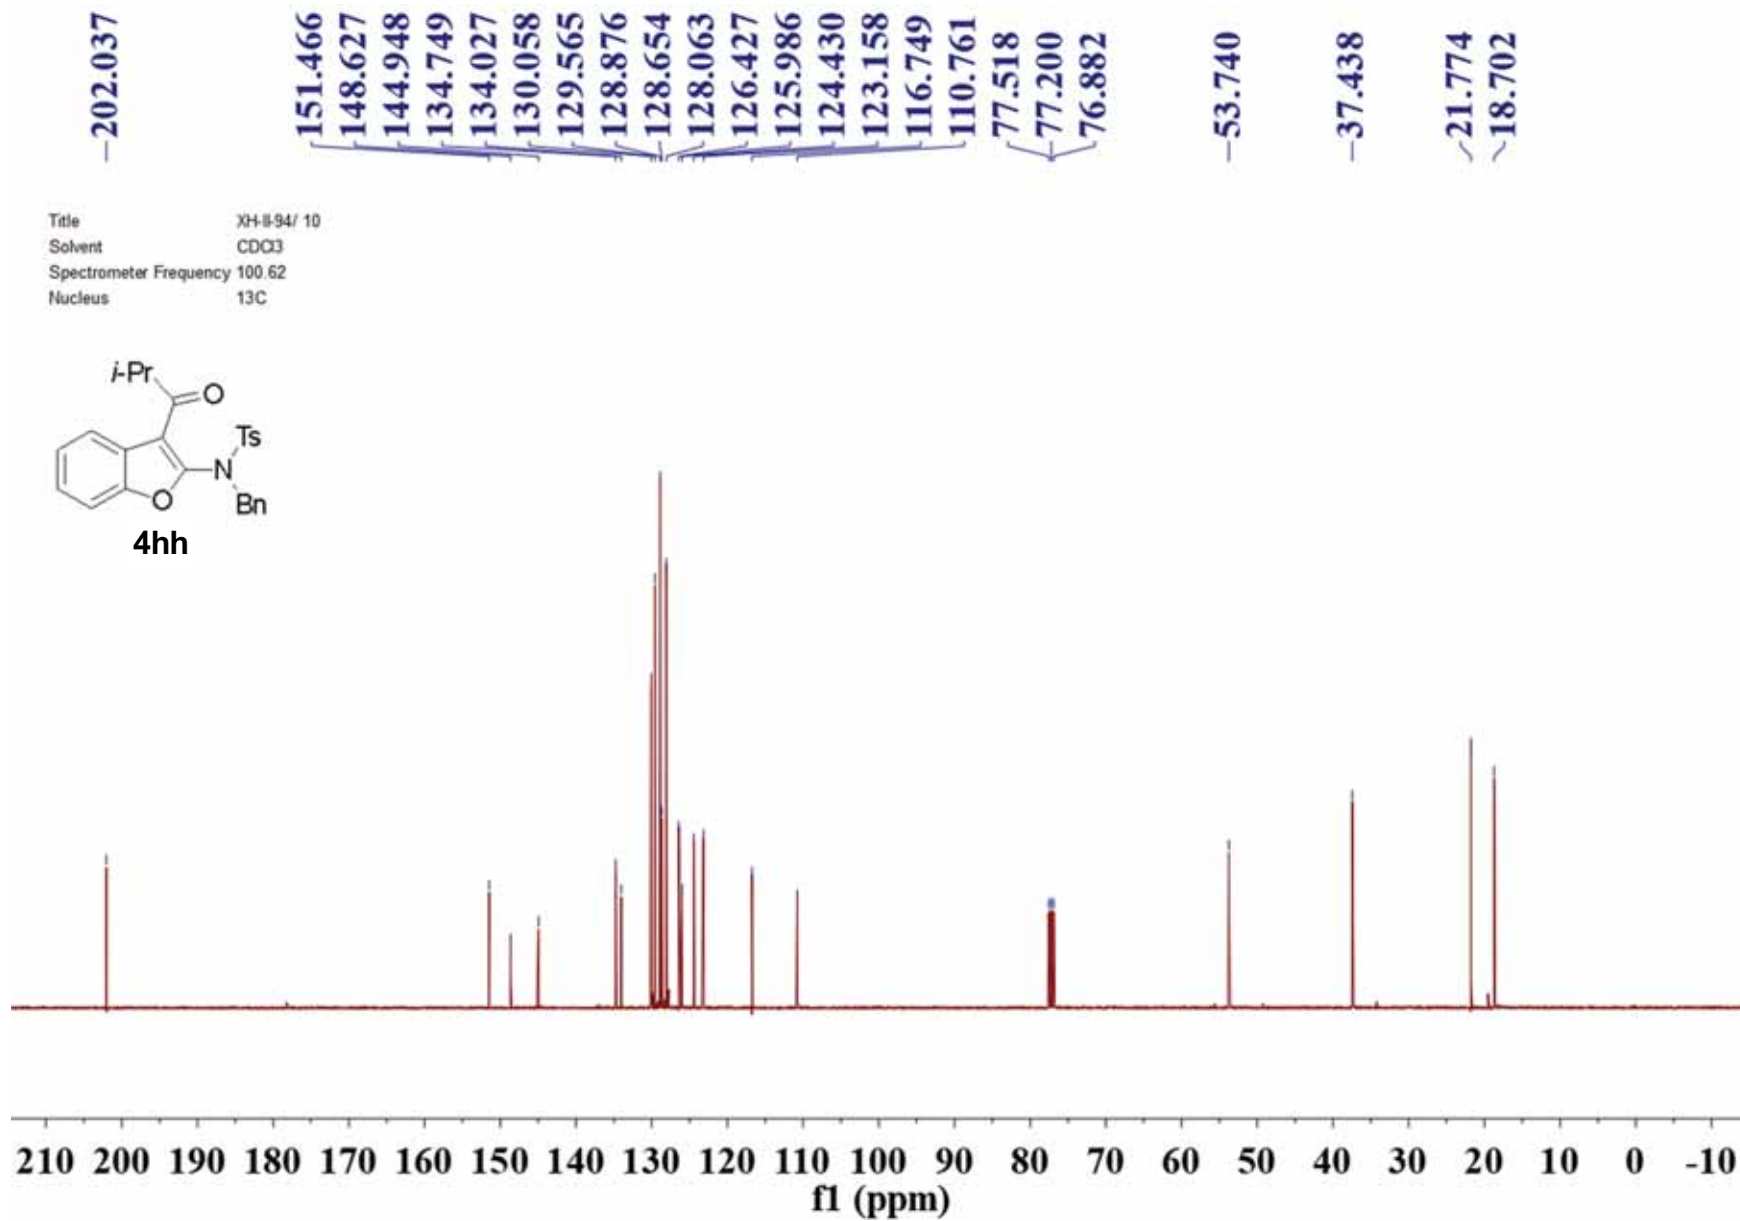

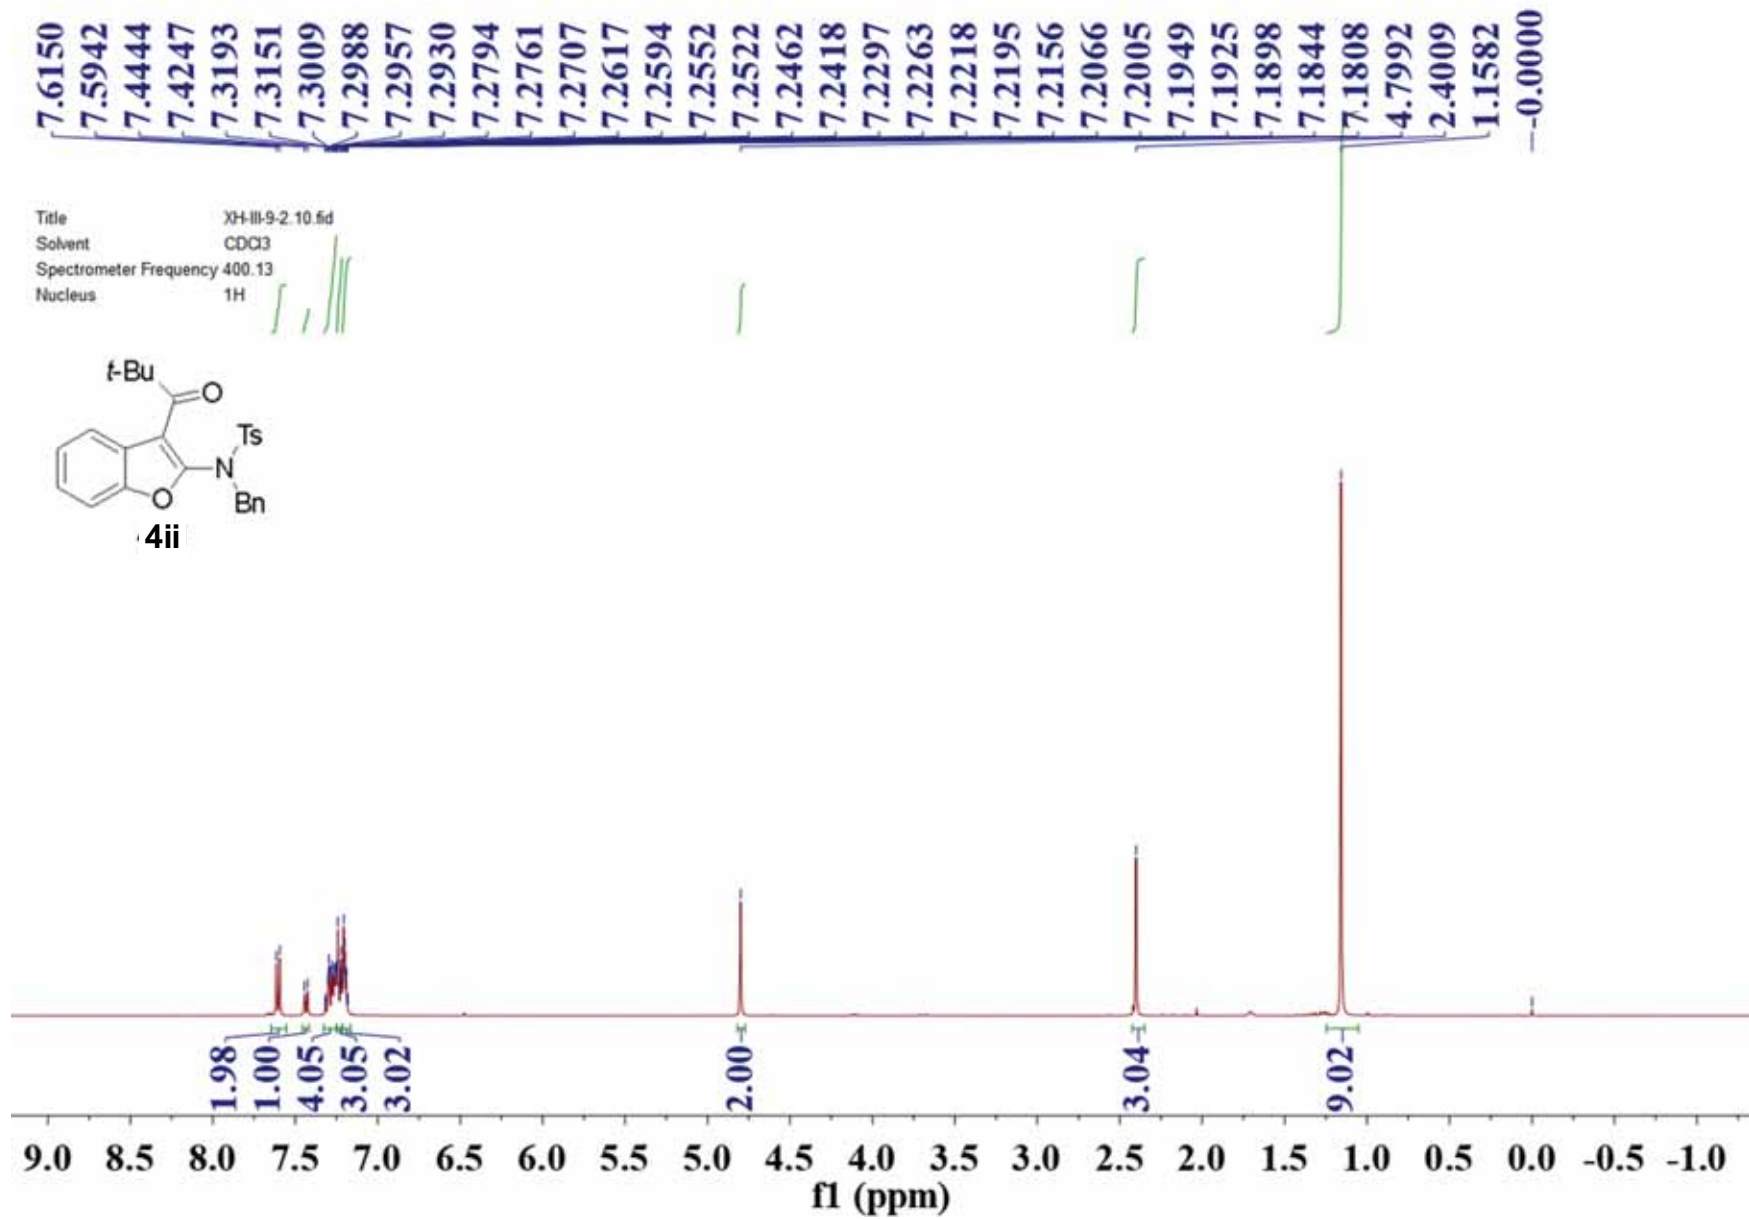

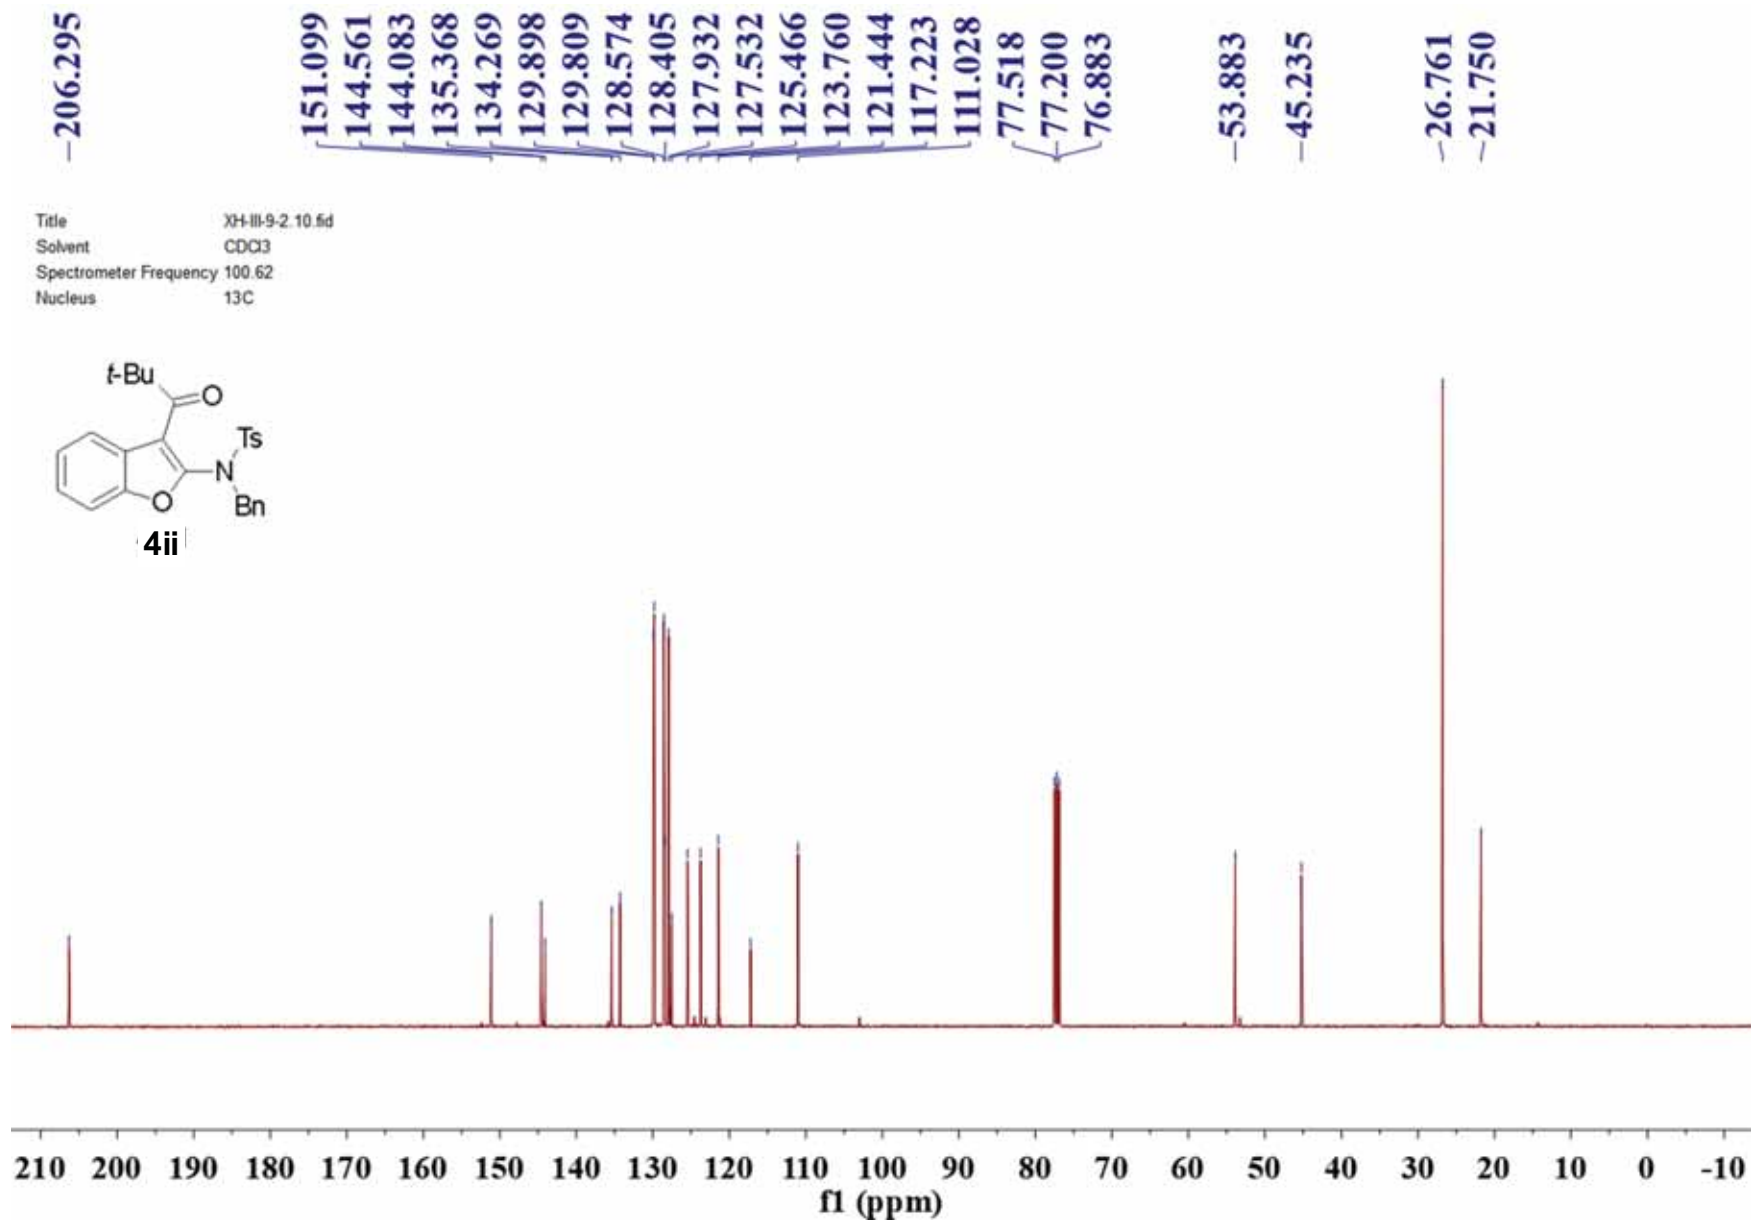

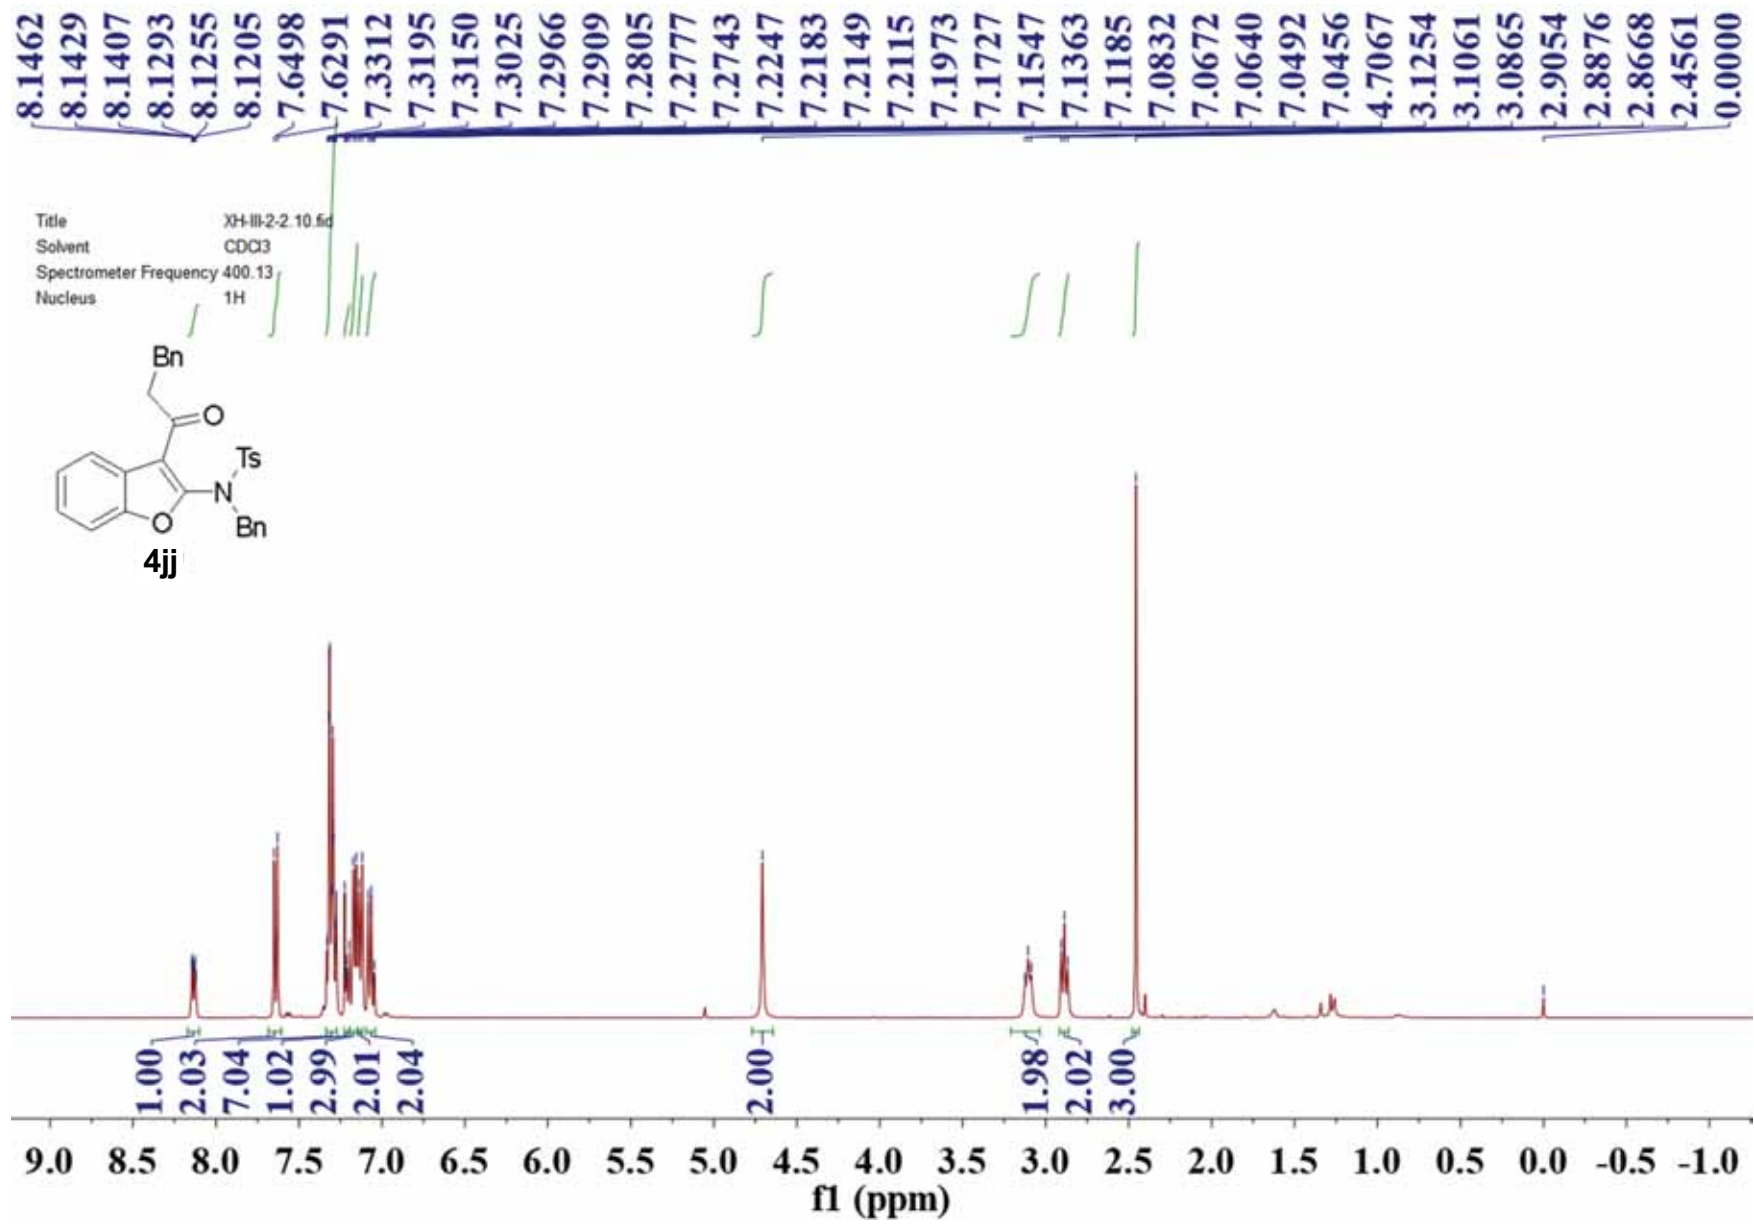

196.096  
151.522  
149.425  
145.048  
141.413  
134.782  
133.711  
130.084  
129.591  
128.845  
128.742  
128.593  
128.433  
128.268  
126.184  
125.931  
125.921  
124.619  
123.544  
118.069  
110.778

77.518  
77.200  
76.882

-54.185

-41.992

-29.448

-21.833

Title XH-III-2-2/ 10  
Solvent CDCl3  
Spectrometer Frequency 100.62  
Nucleus 13C

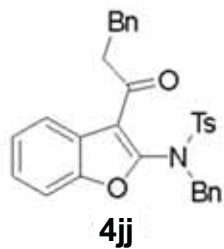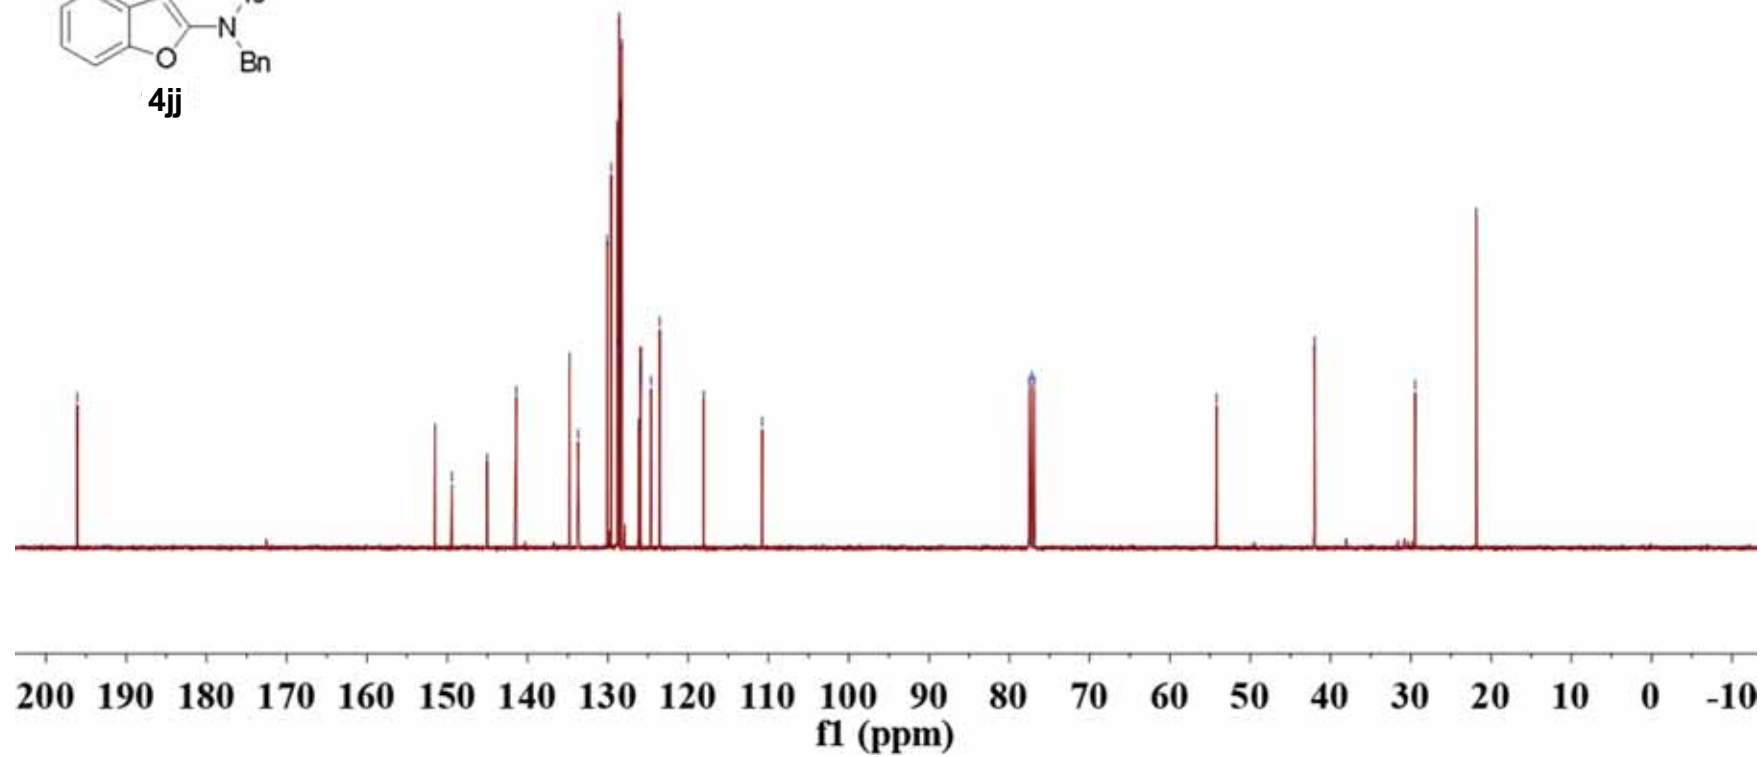

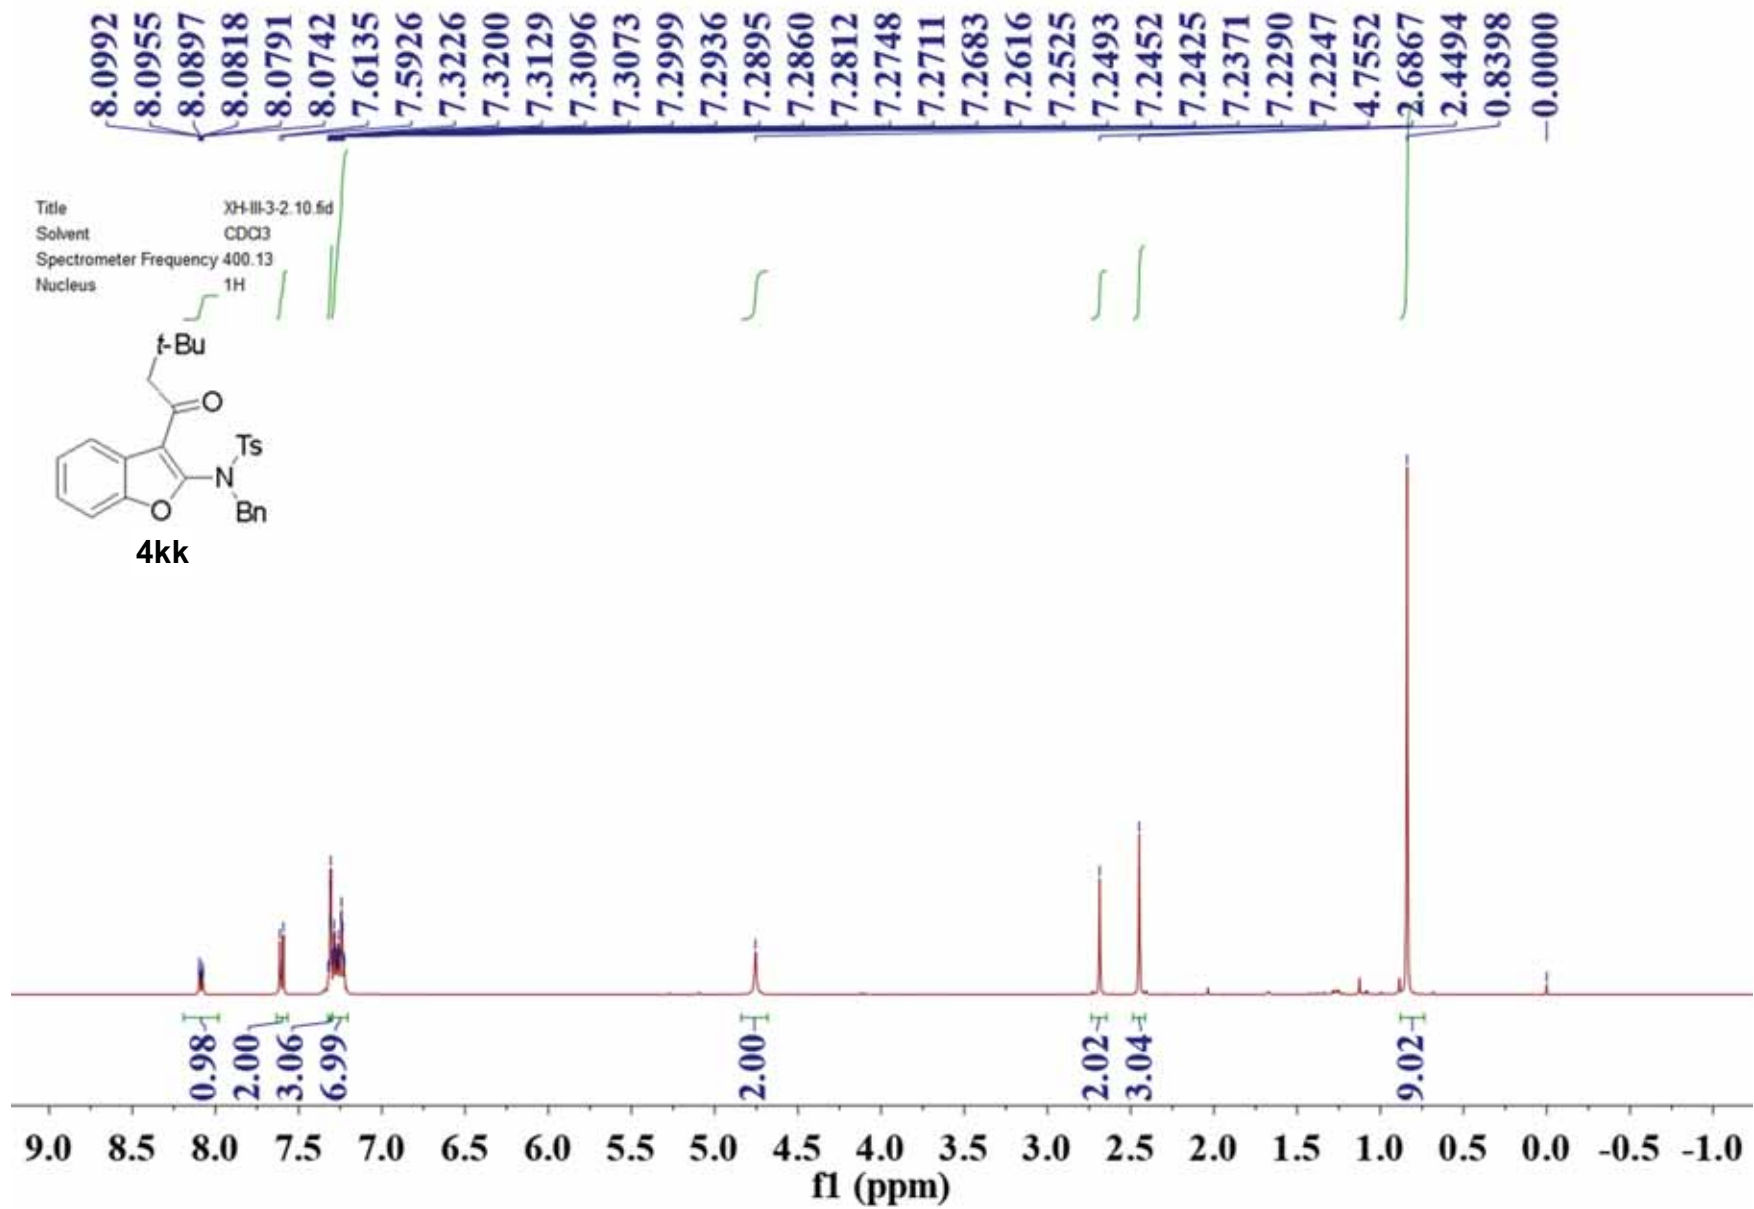

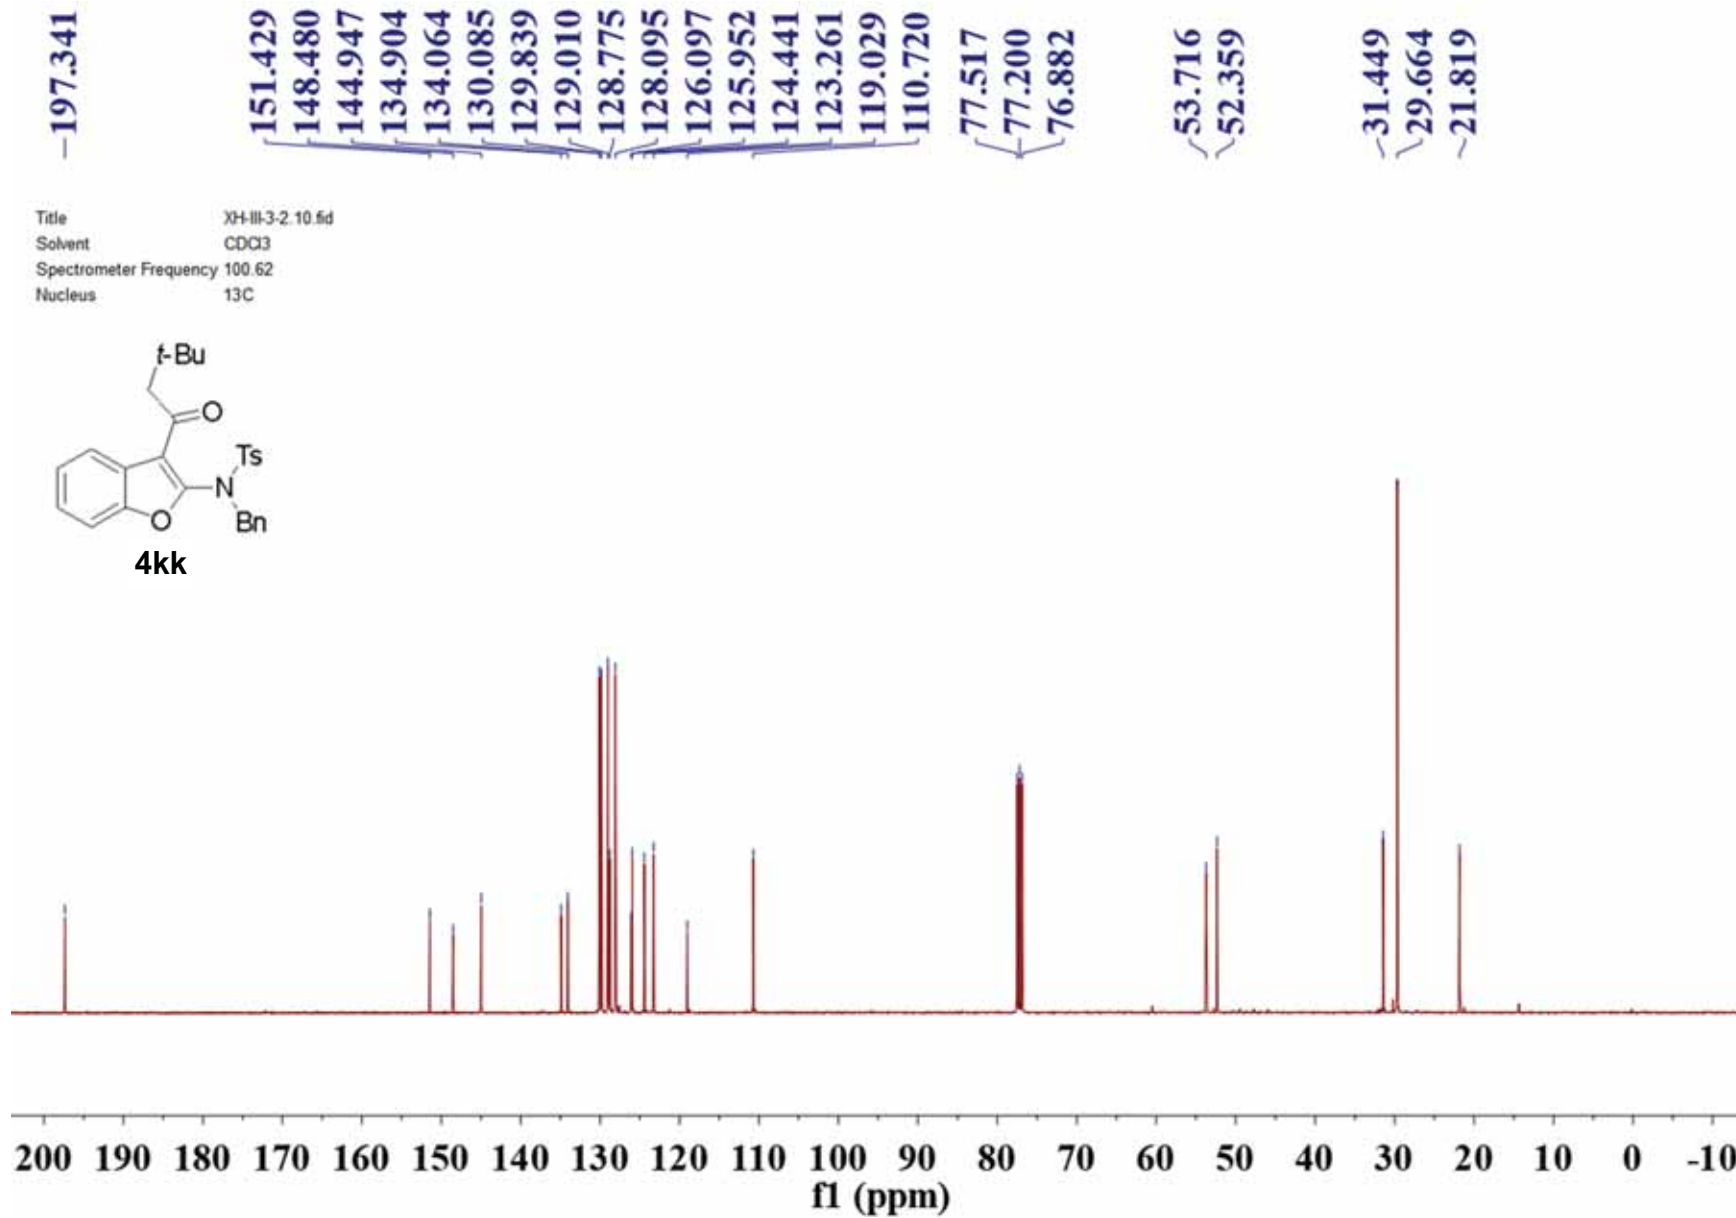



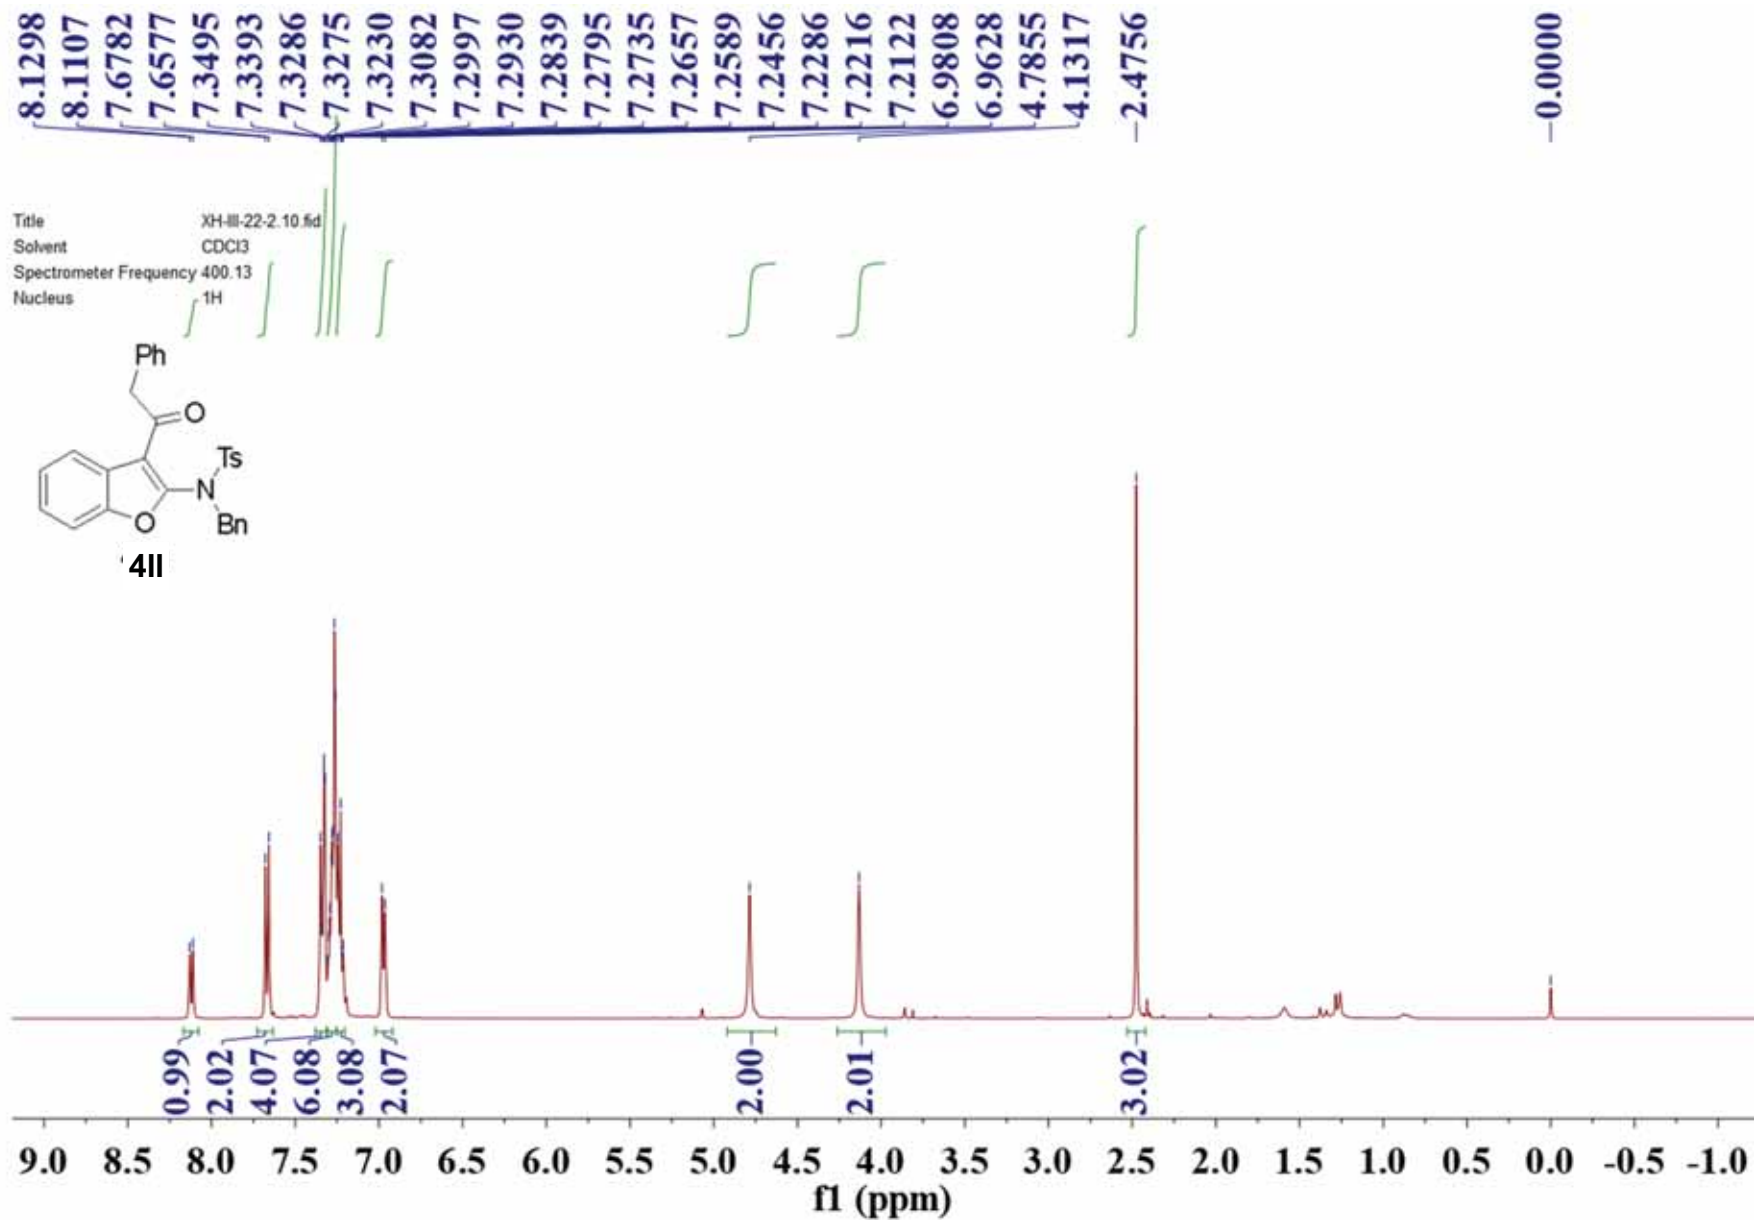

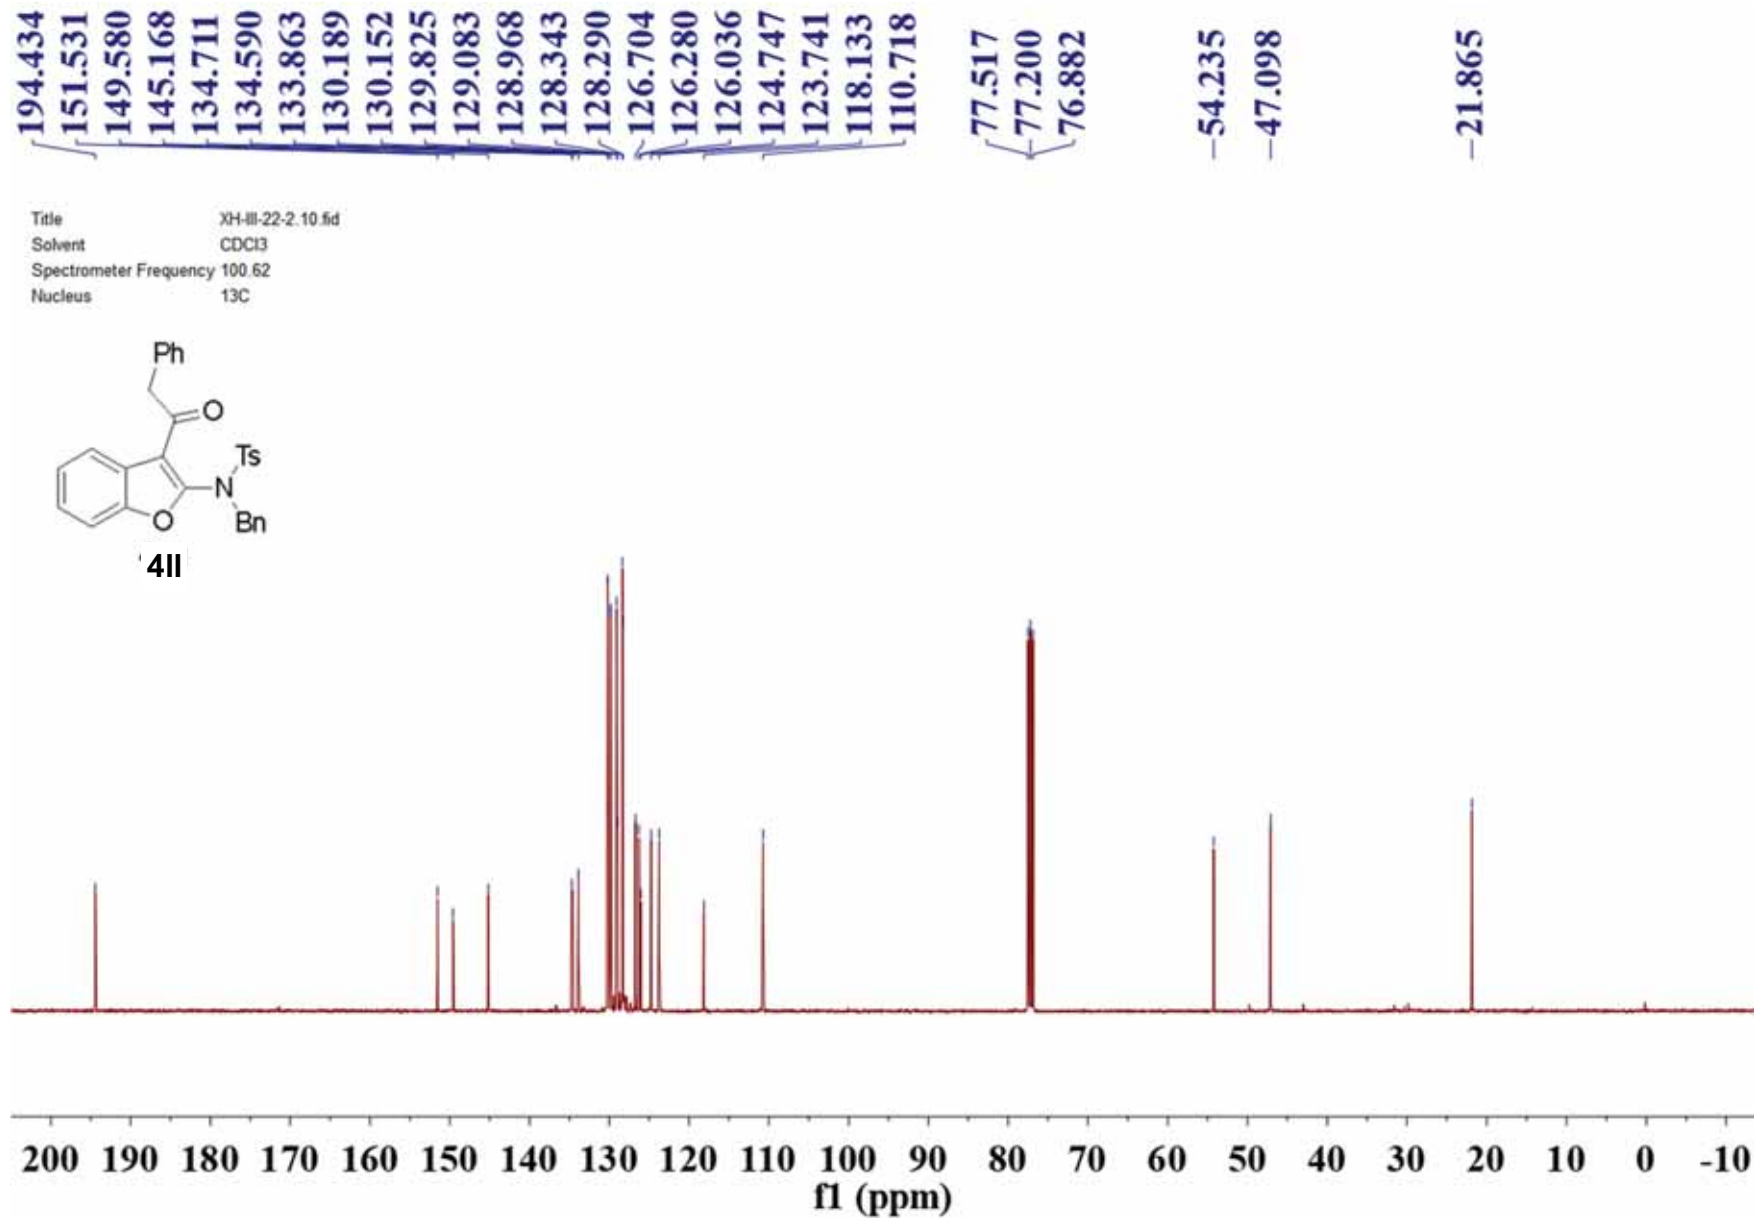

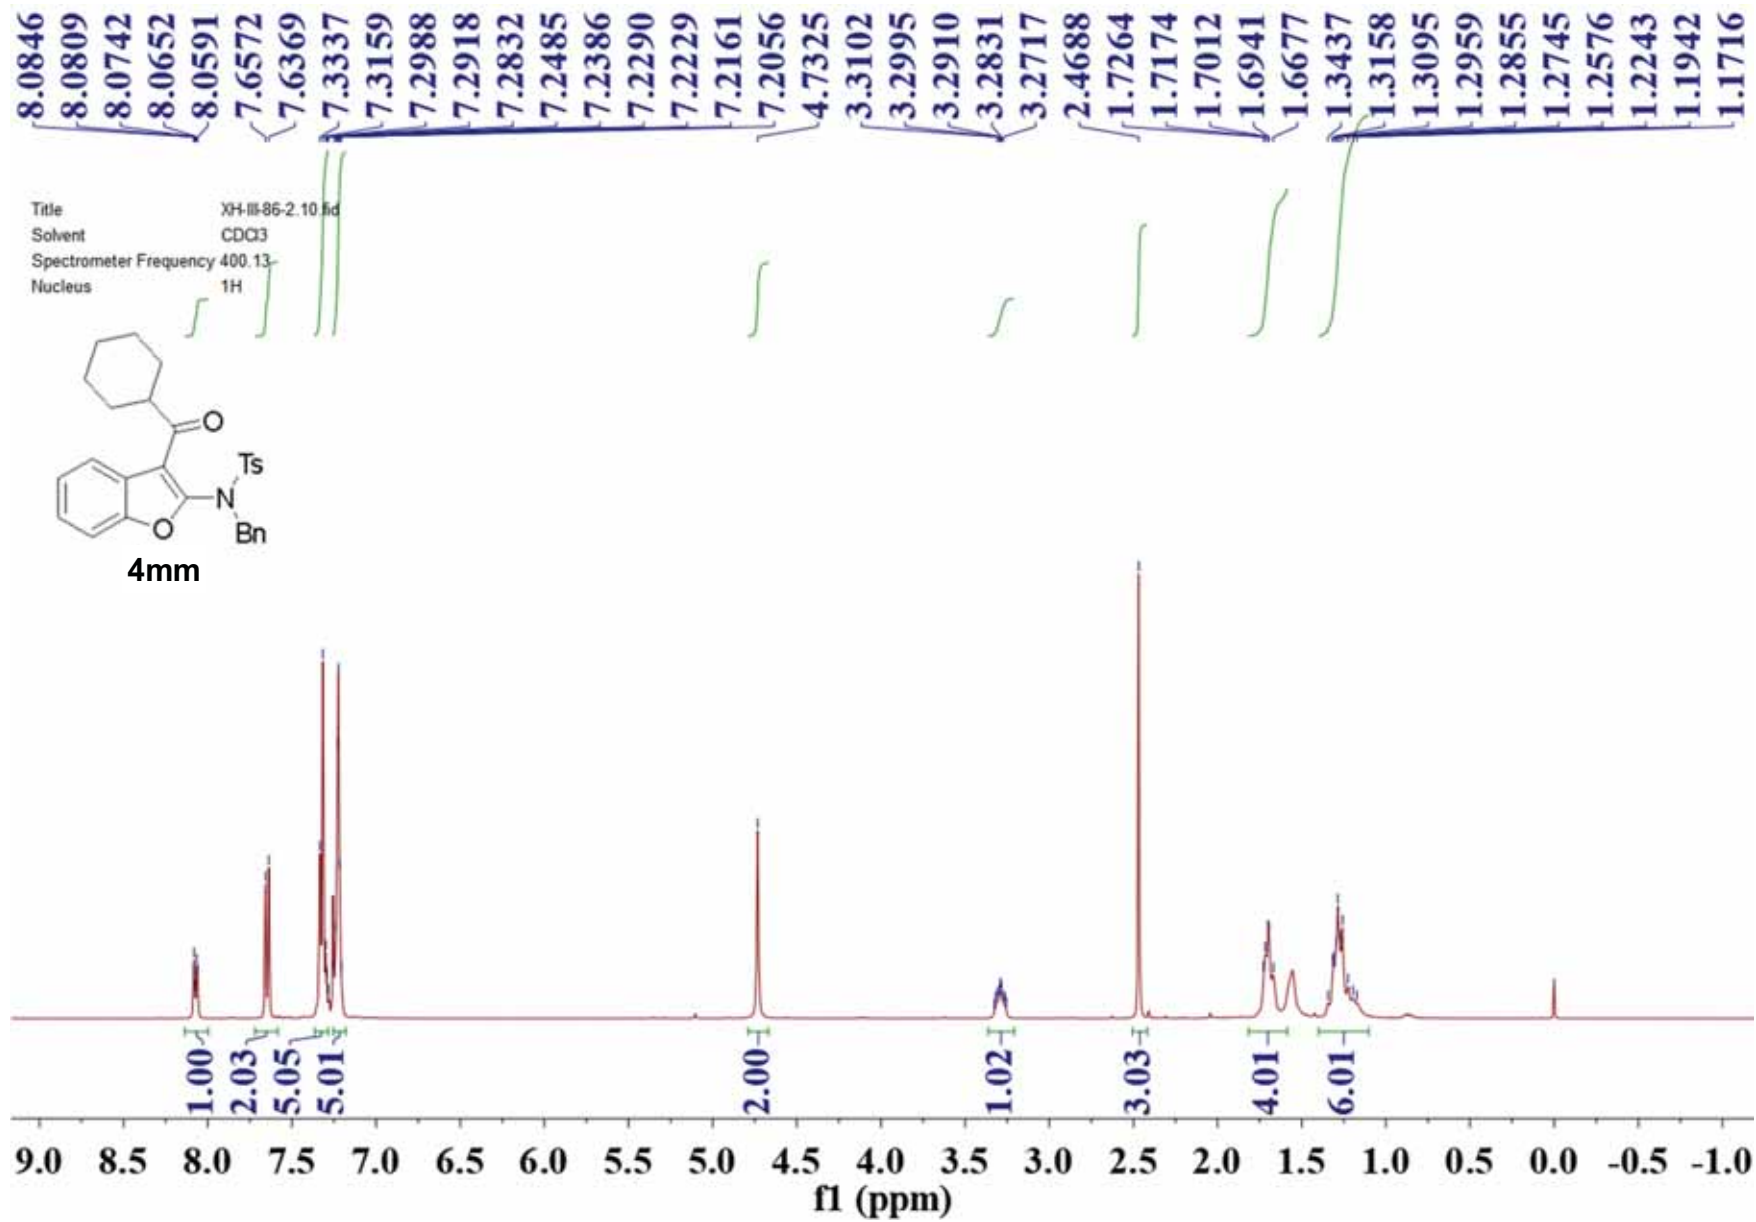

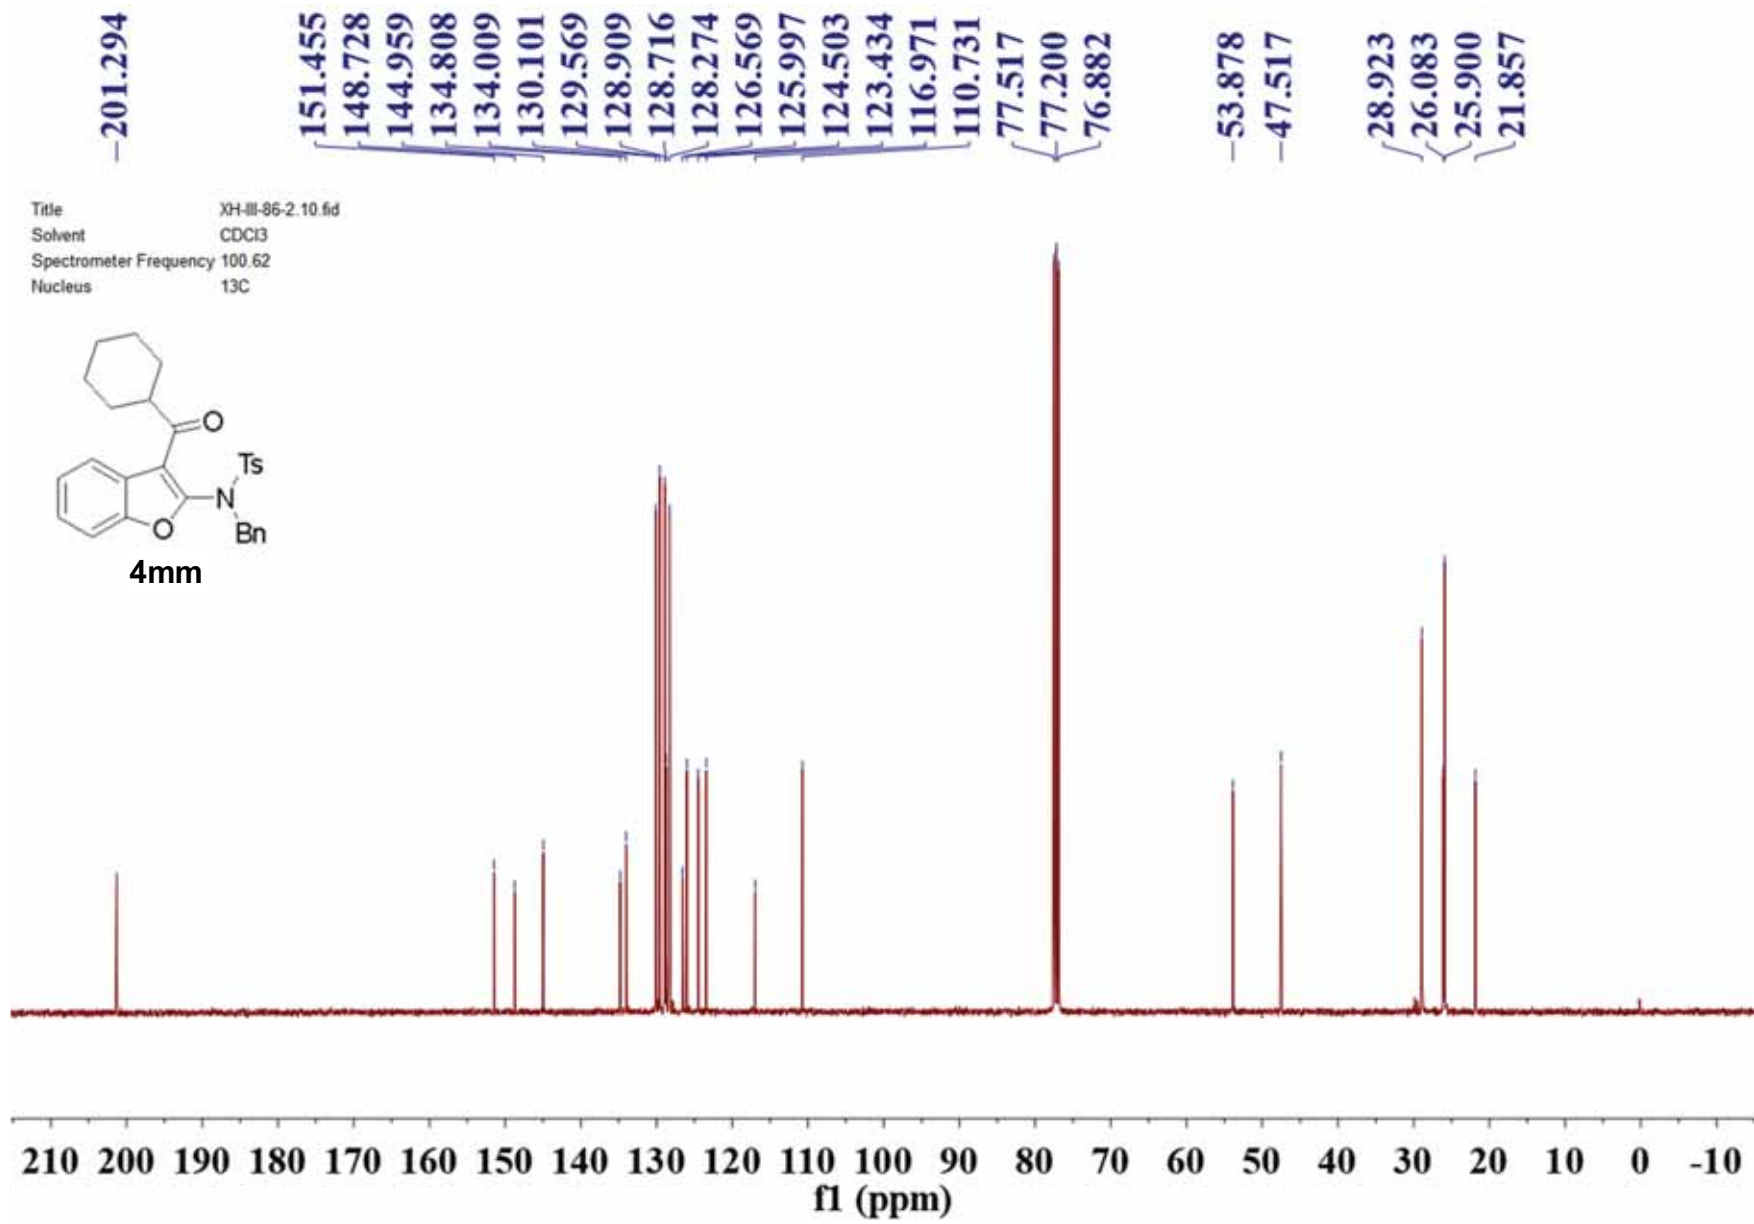

# <sup>1</sup>H NMR and <sup>13</sup>C NMR Spectra of 3-Unsubstituted 2-Amidobenzofurans 3.

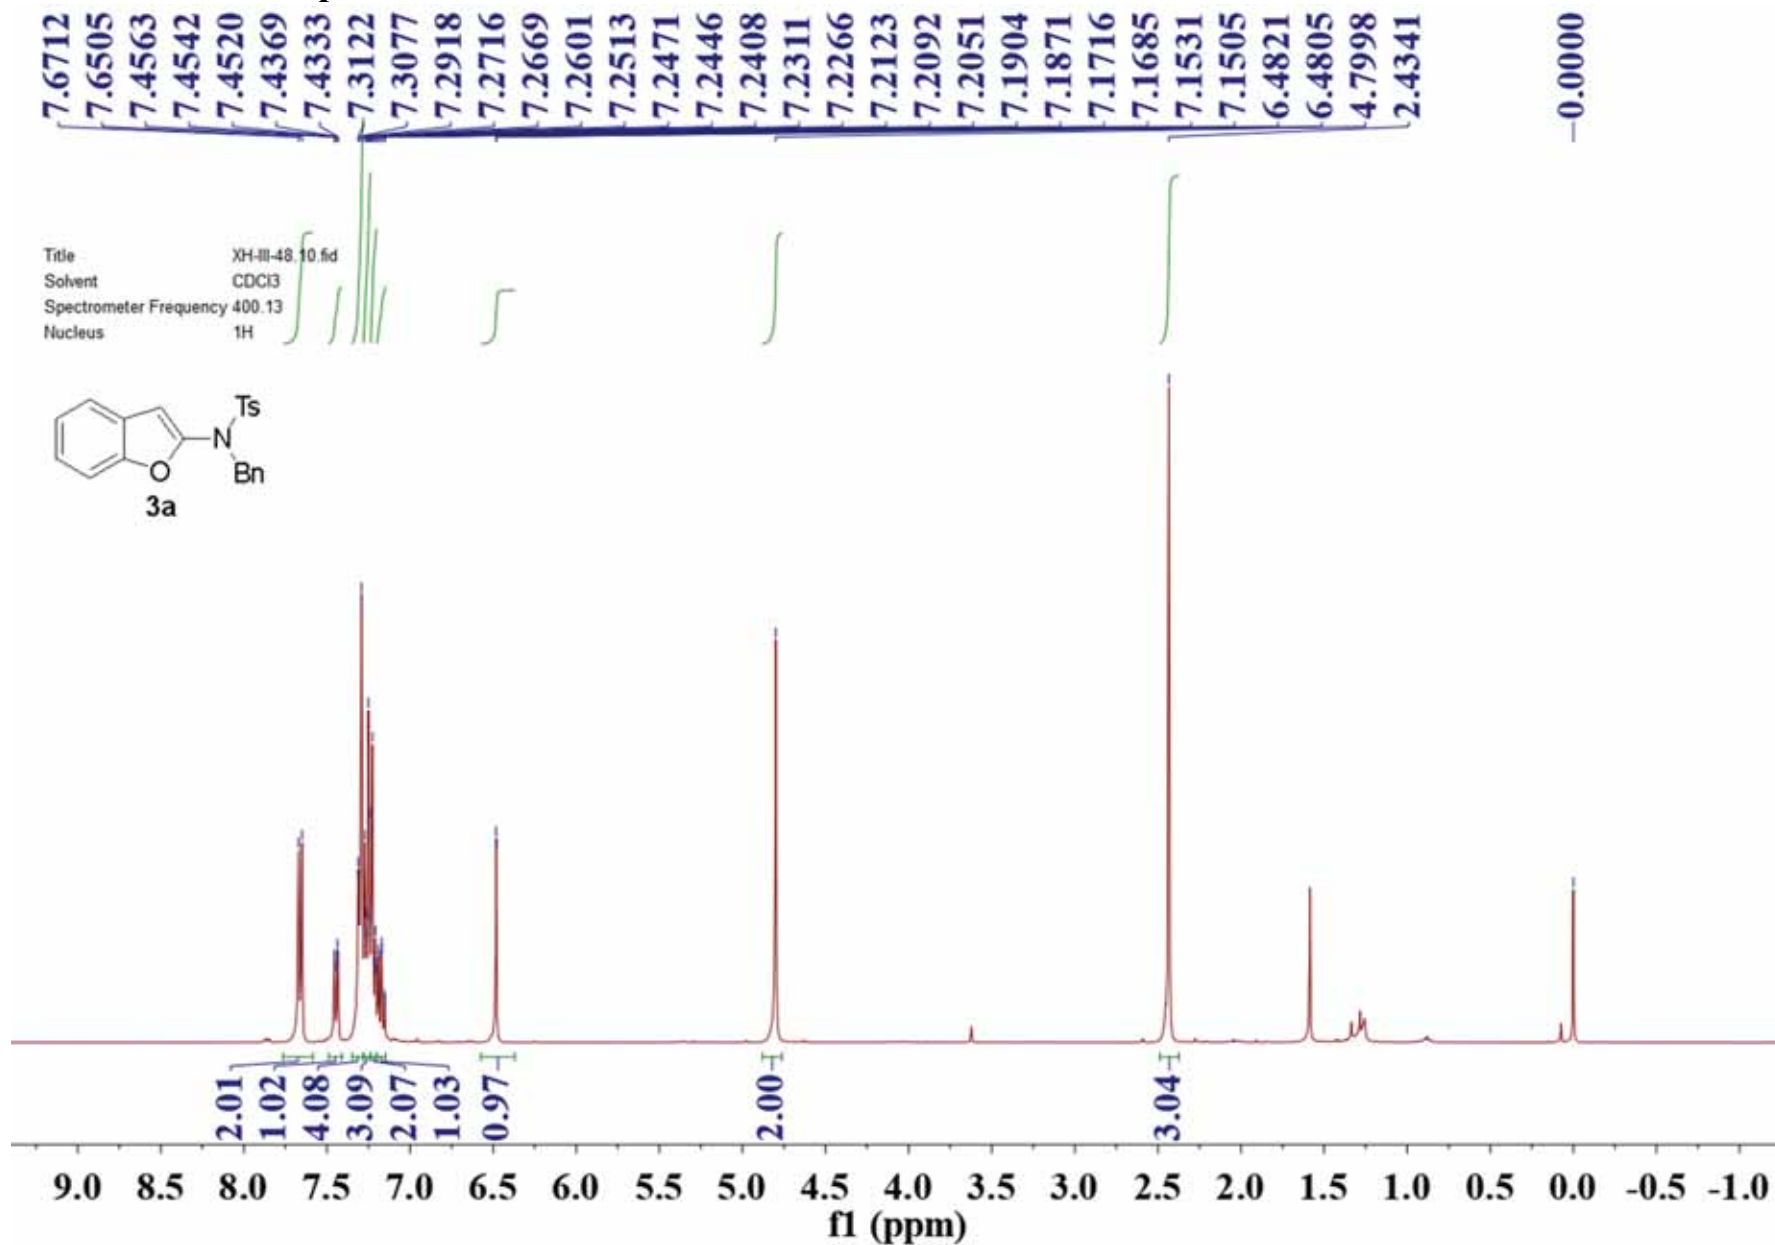

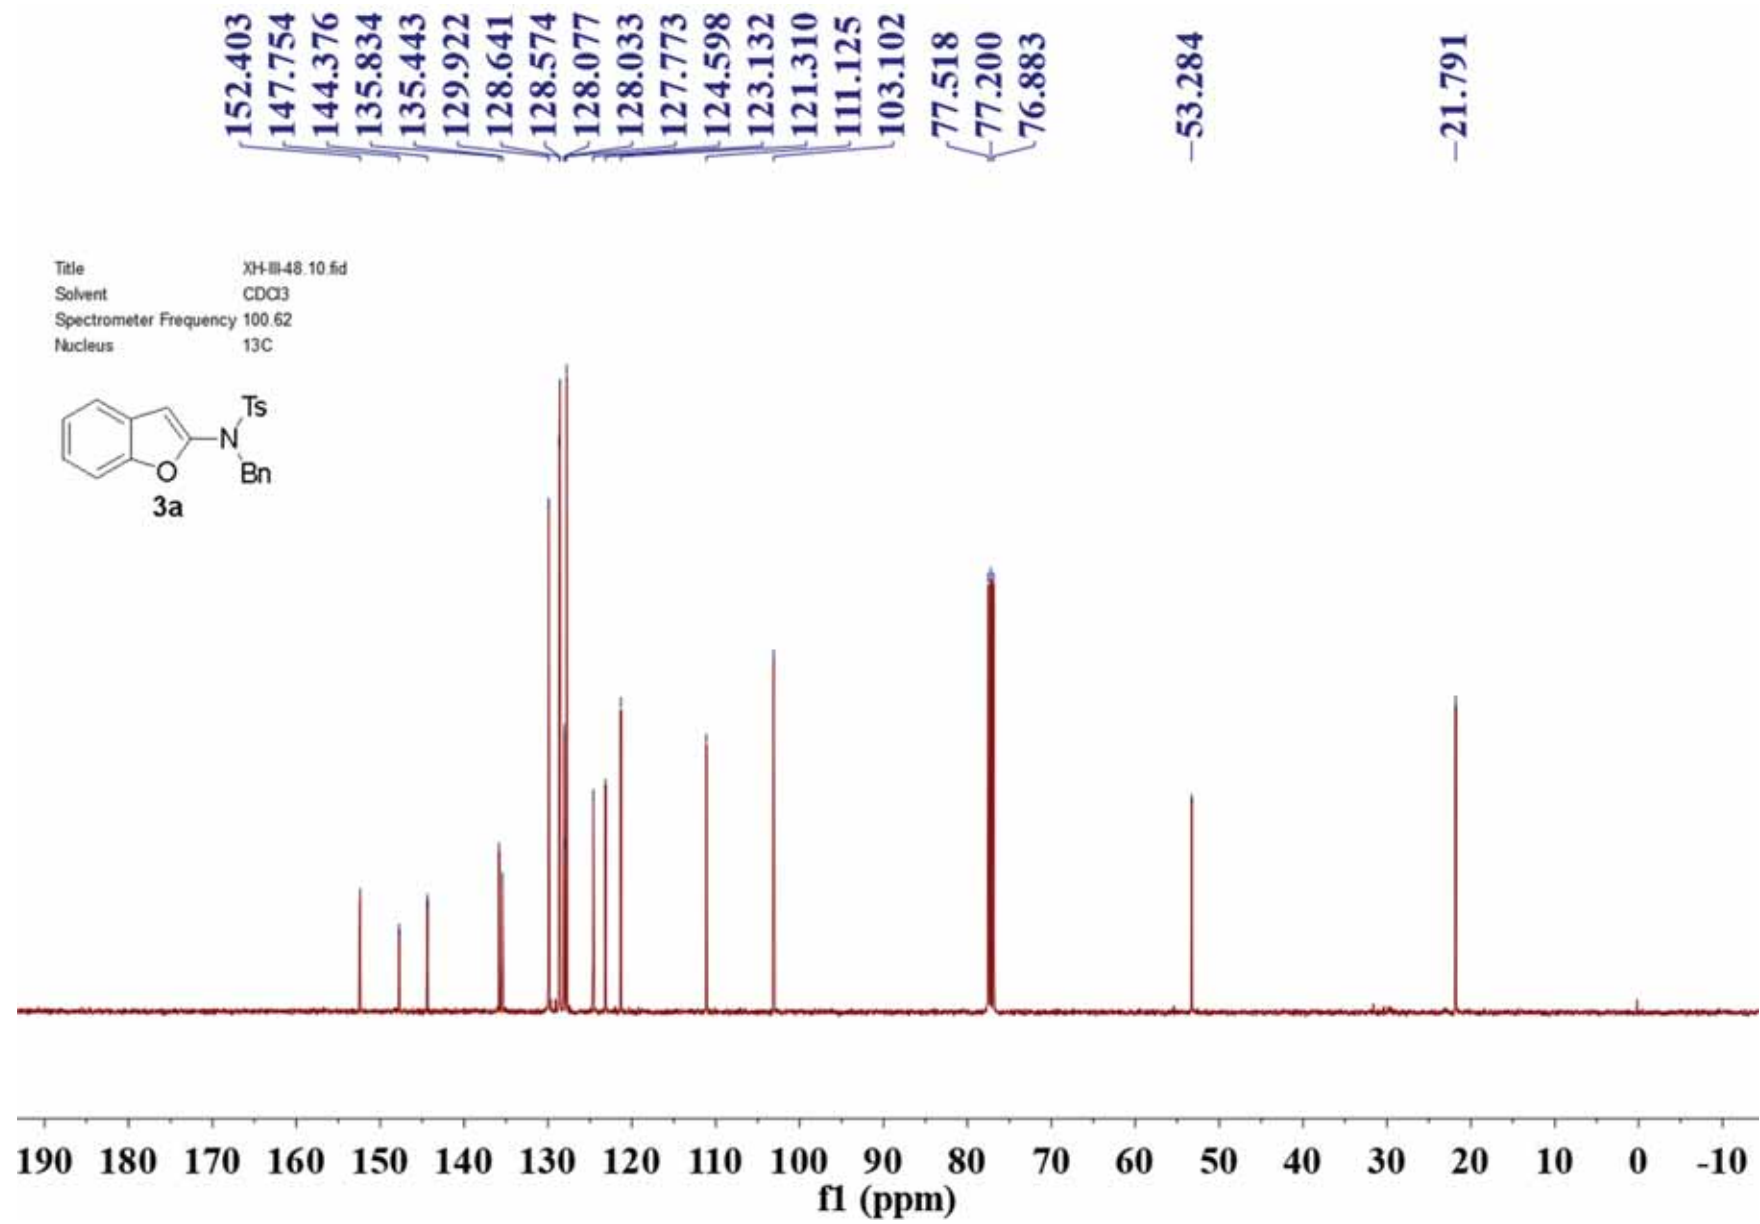

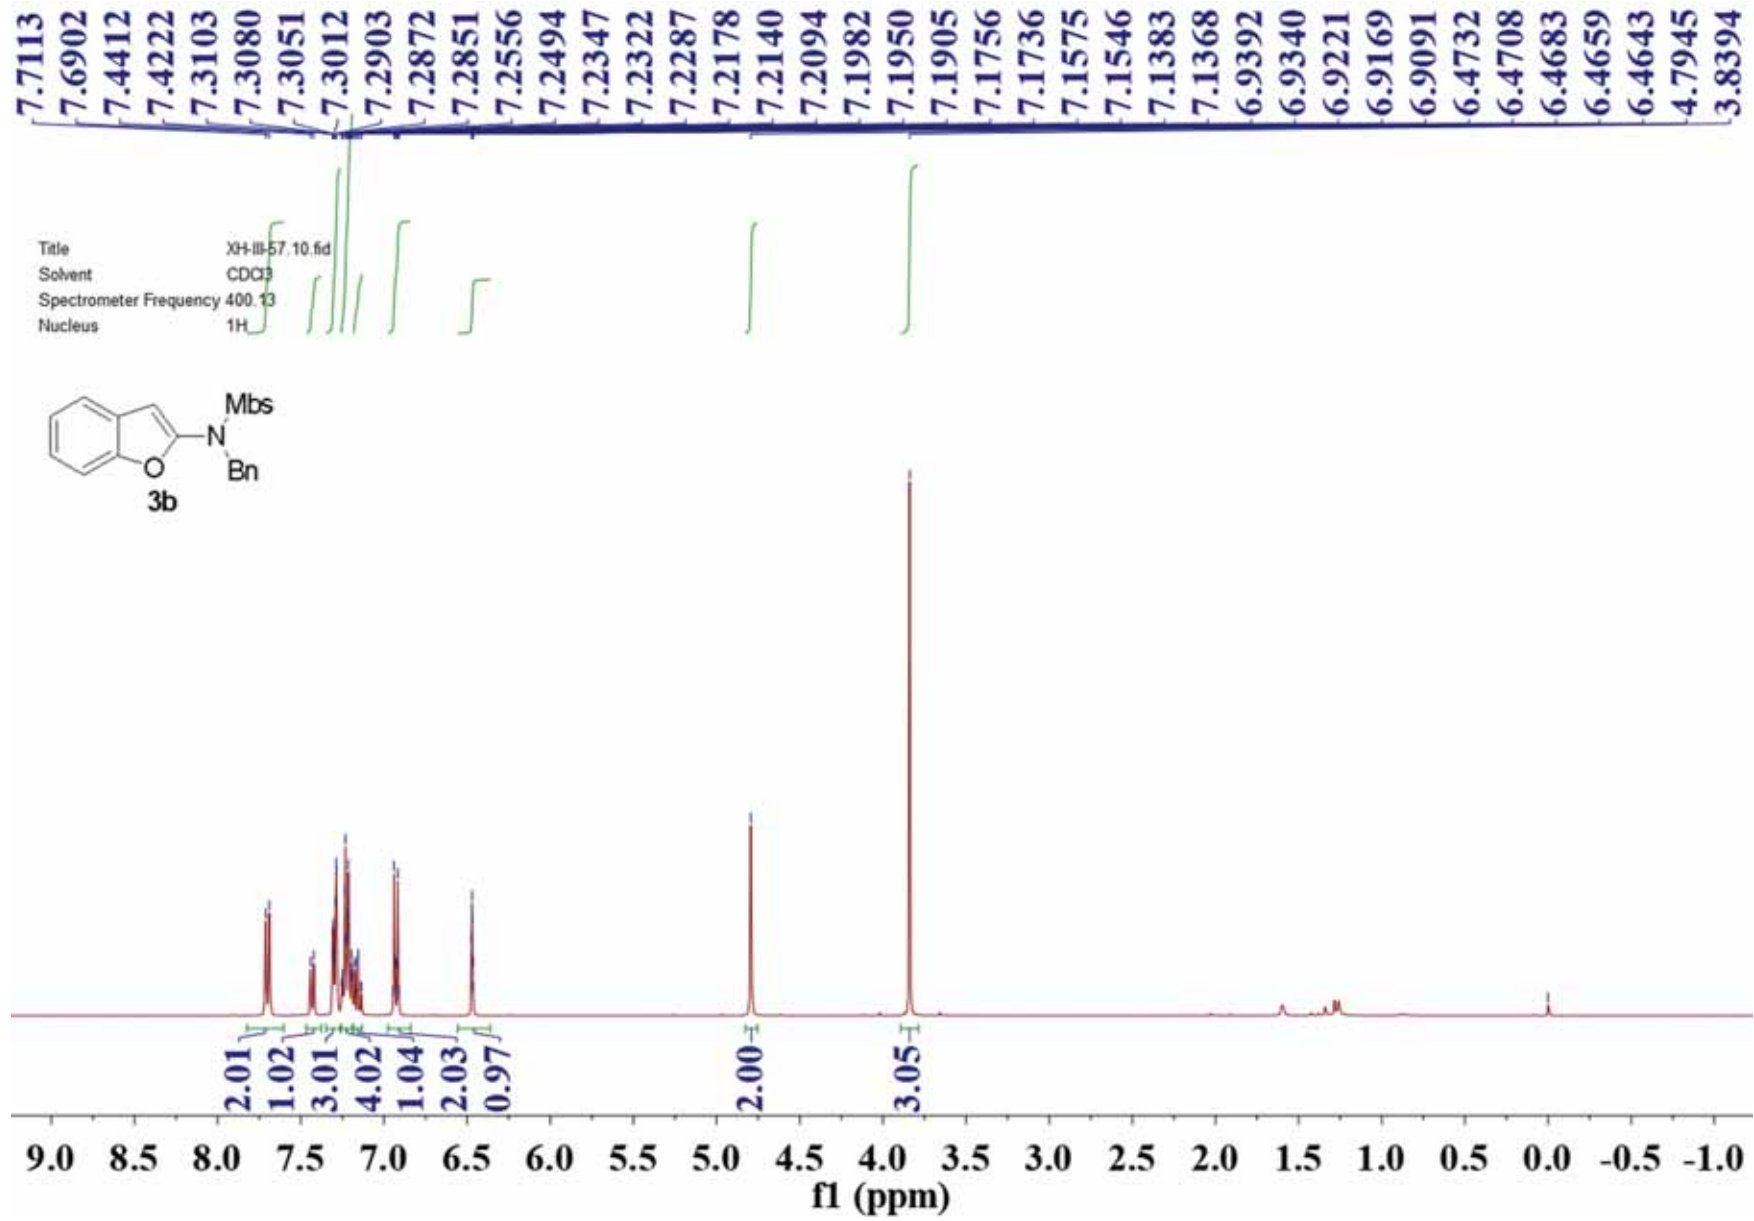

-163.512  
 -152.387  
 -147.928  
 135.499  
 130.330  
 129.921  
 128.620  
 128.558  
 128.040  
 124.567  
 123.115  
 121.274  
 114.433  
 111.114  
 102.992  
 77.518  
 77.200  
 76.882  
 55.782  
 53.261

Title XH-III-57.10.fid  
 Solvent CDCl3  
 Spectrometer Frequency 100.62  
 Nucleus 13C

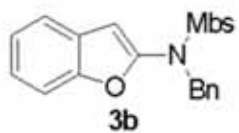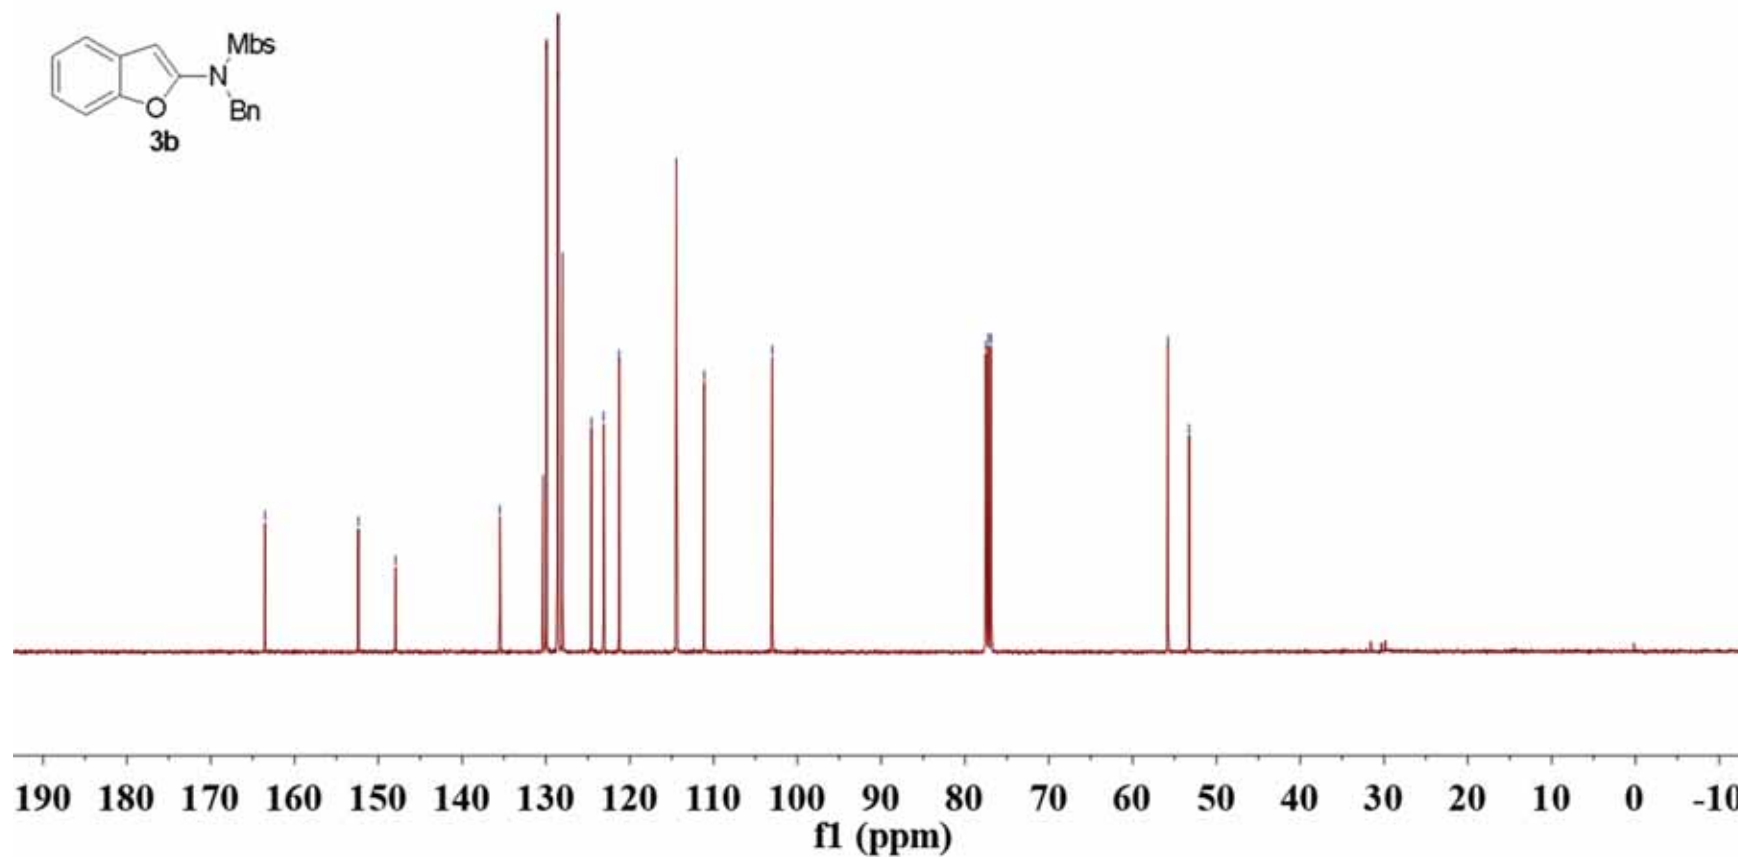



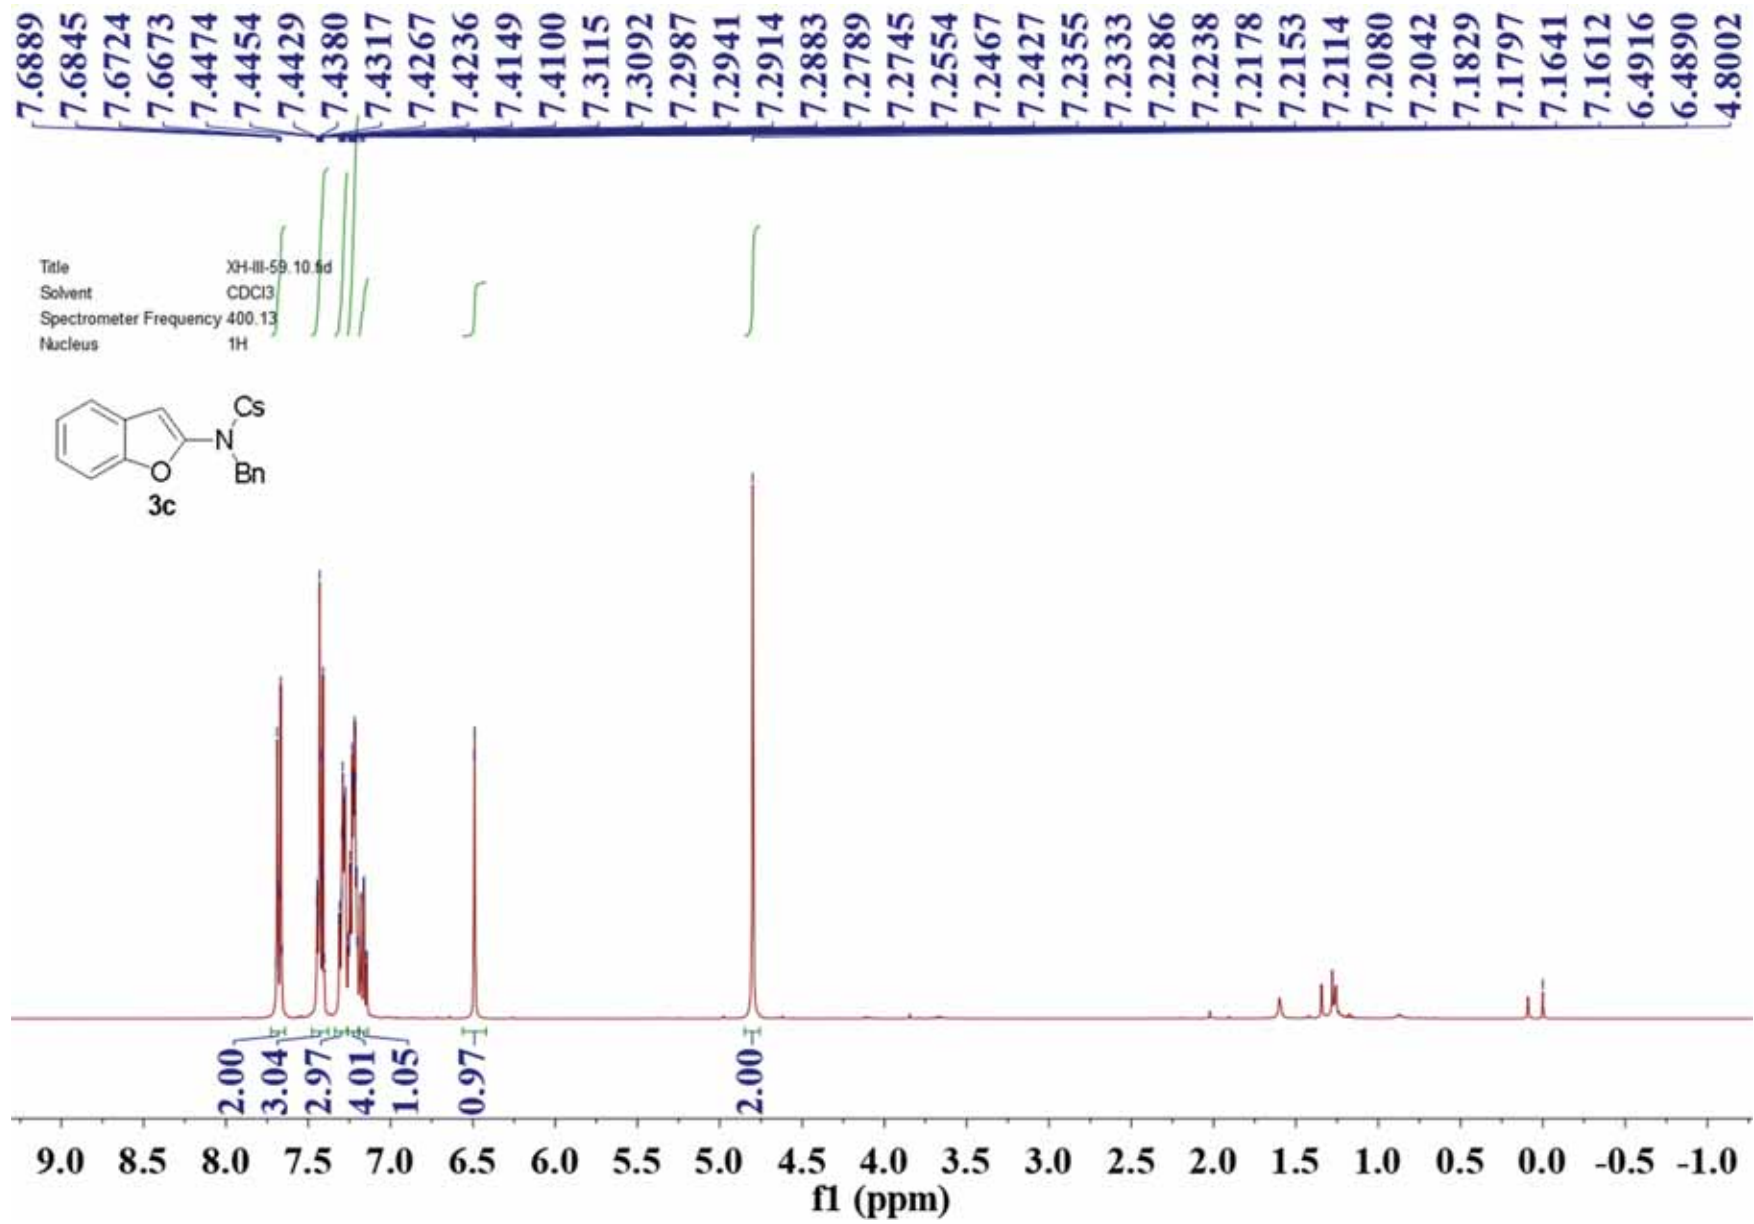

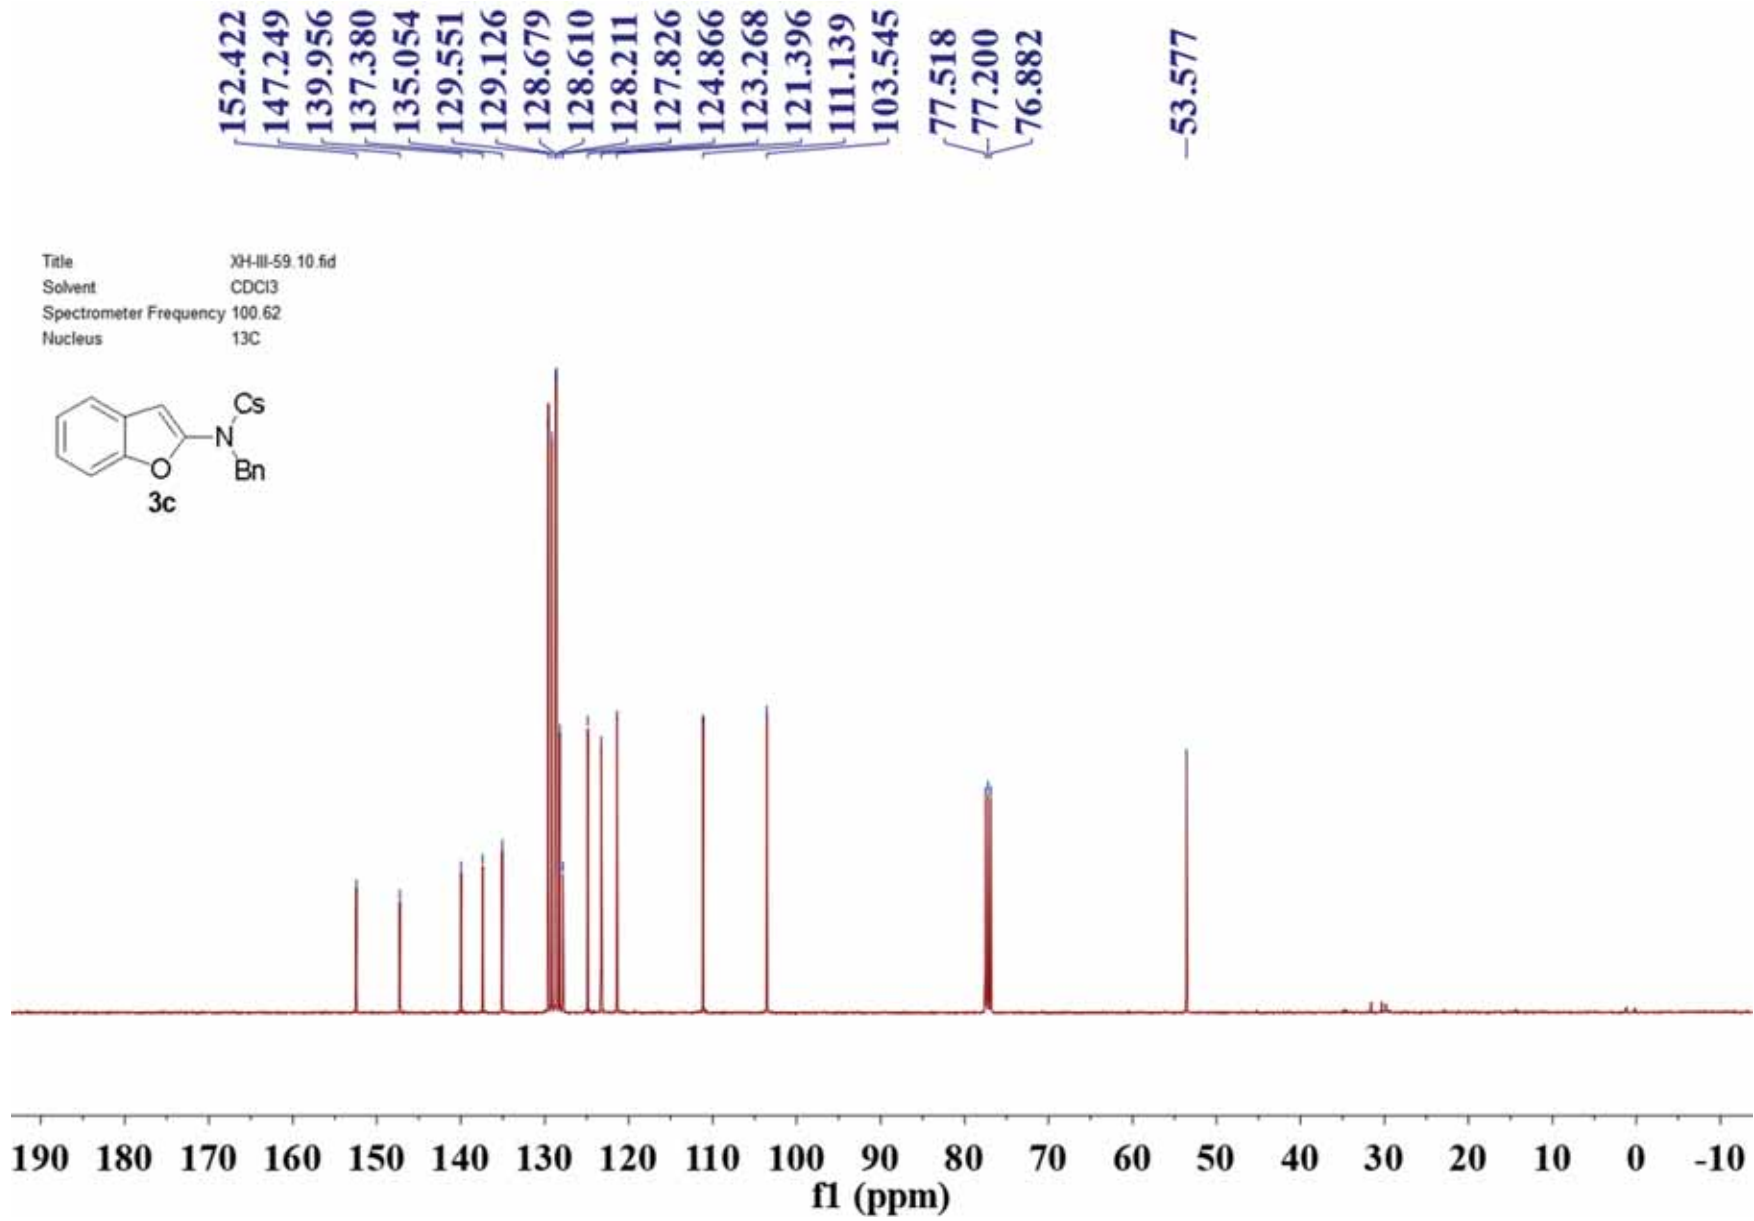

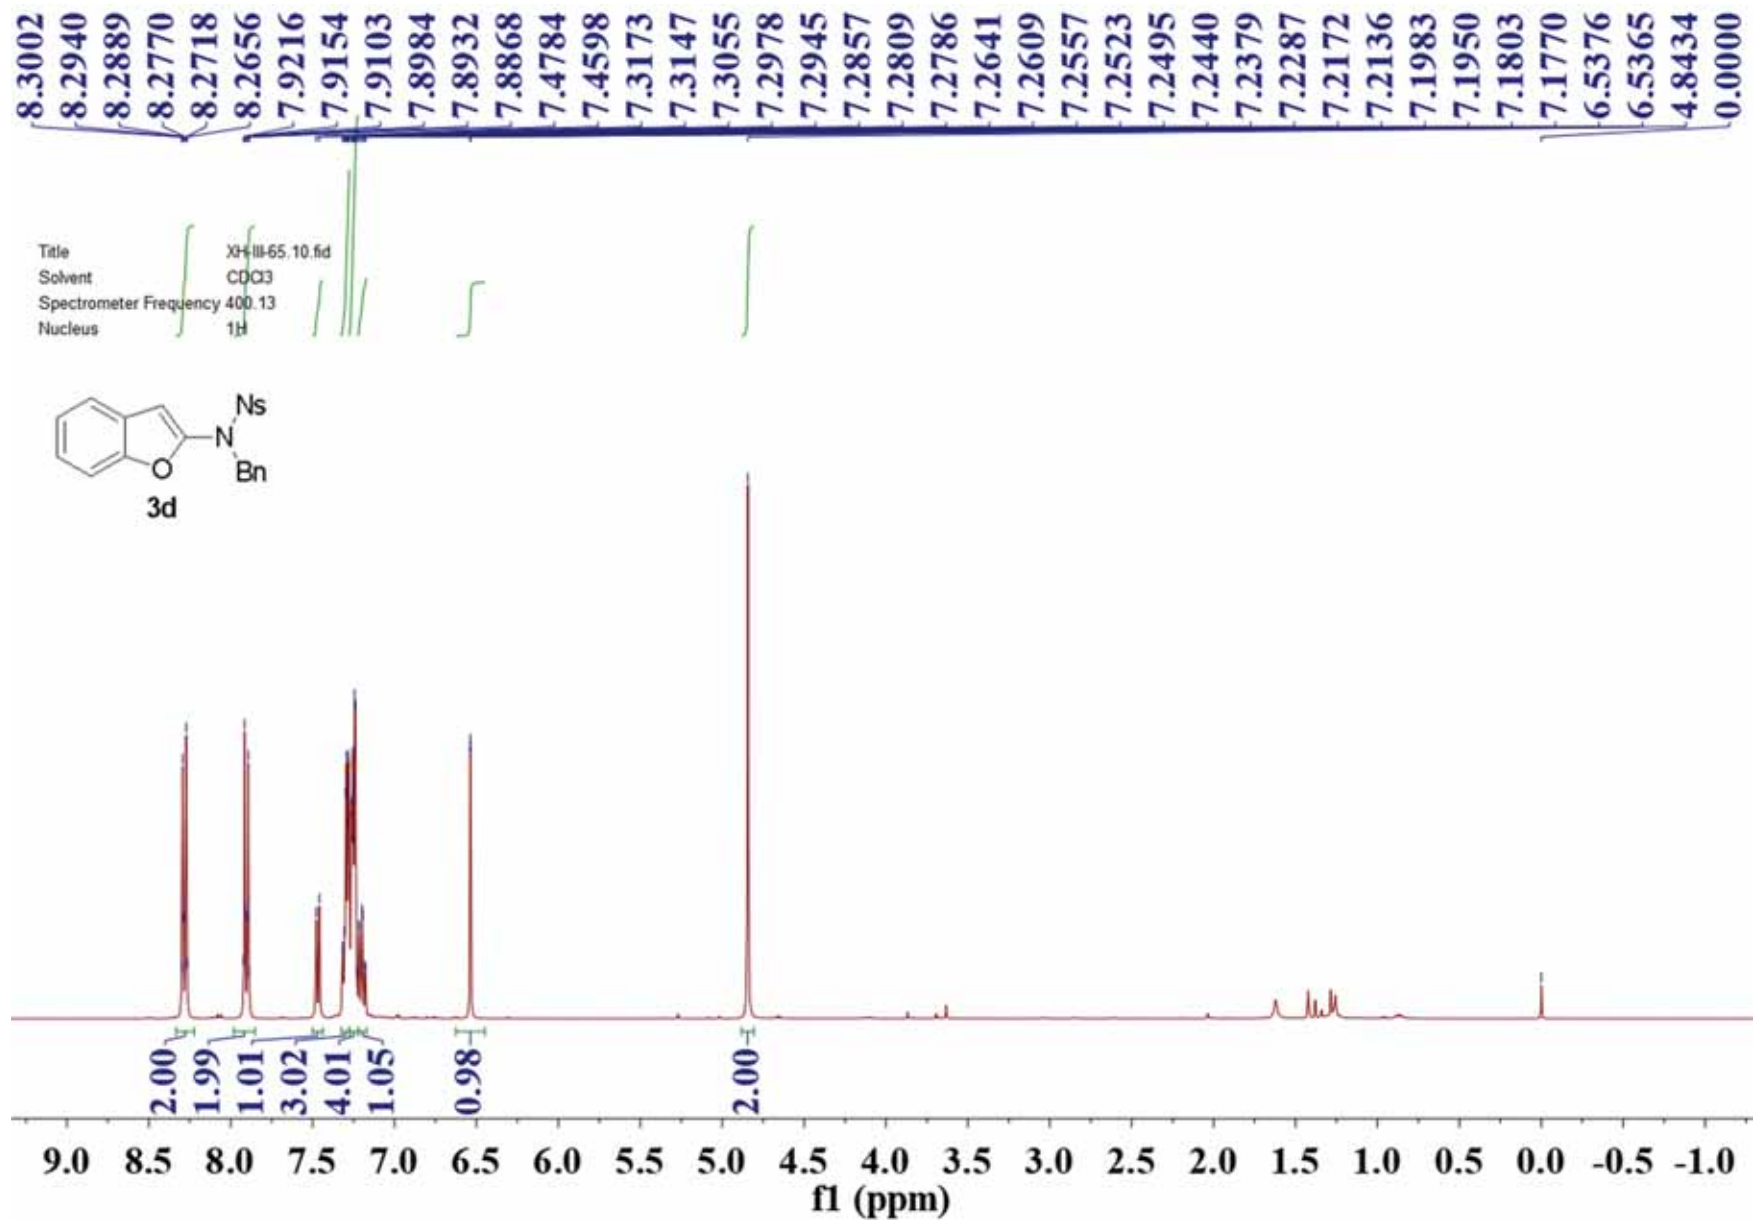

152.497  
150.445  
146.610  
144.723  
134.620  
128.949  
128.785  
128.741  
128.461  
127.655  
125.231  
124.443  
123.490  
121.575  
111.194  
104.156  
77.517  
77.200  
76.882  
-54.046

Title XH-III-65\_10.fid  
Solvent CDCl3  
Spectrometer Frequency 100.62  
Nucleus 13C

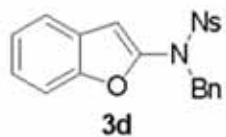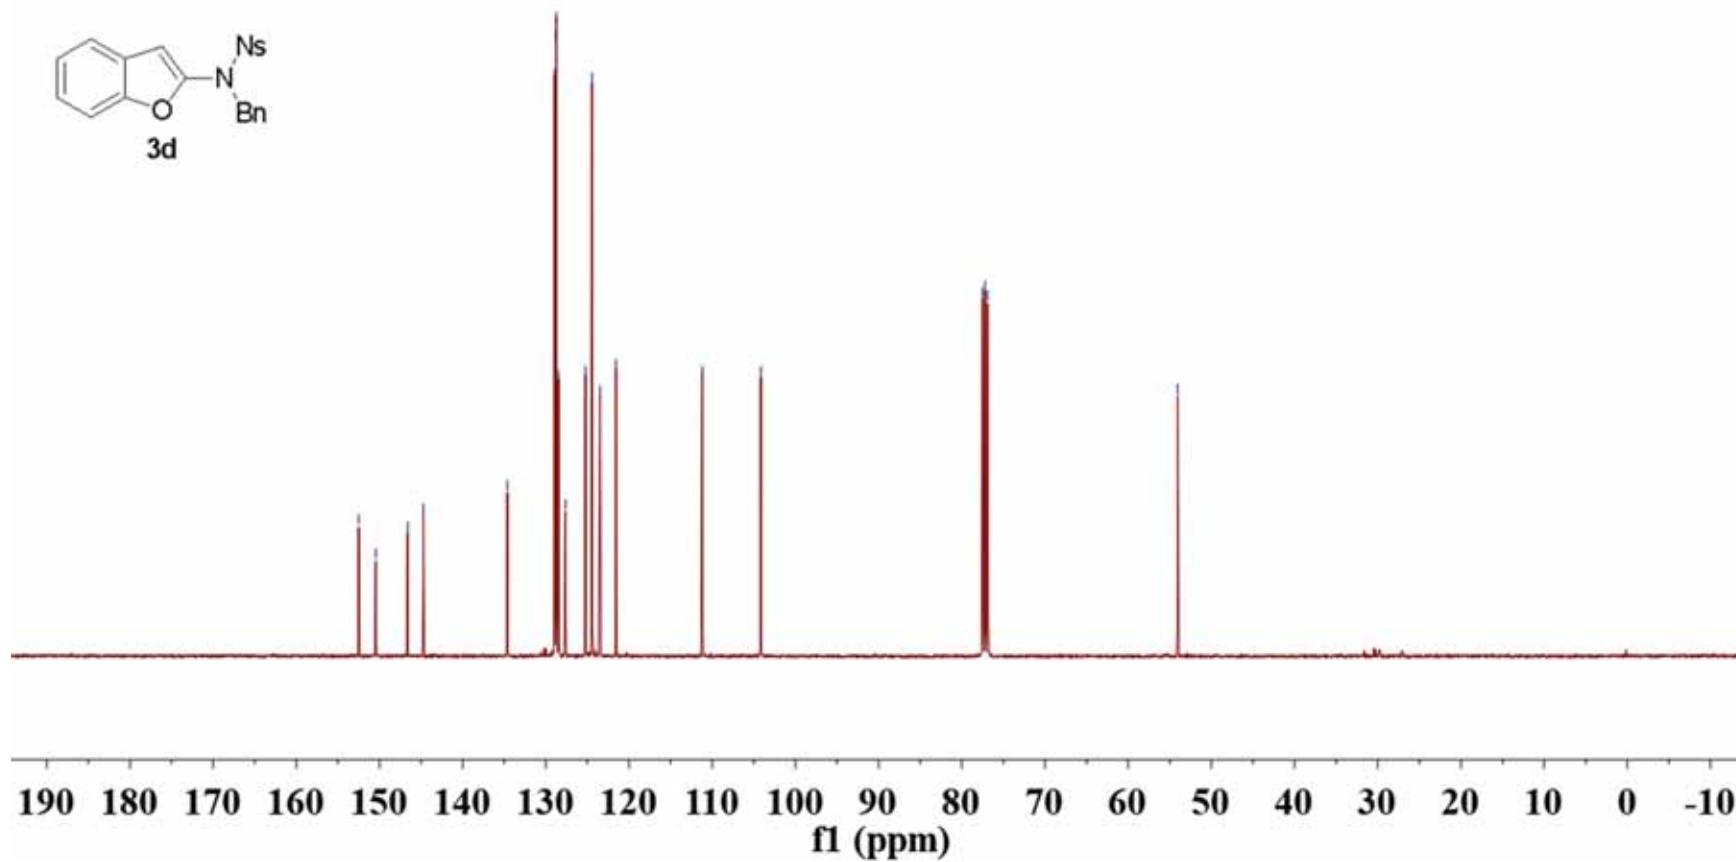

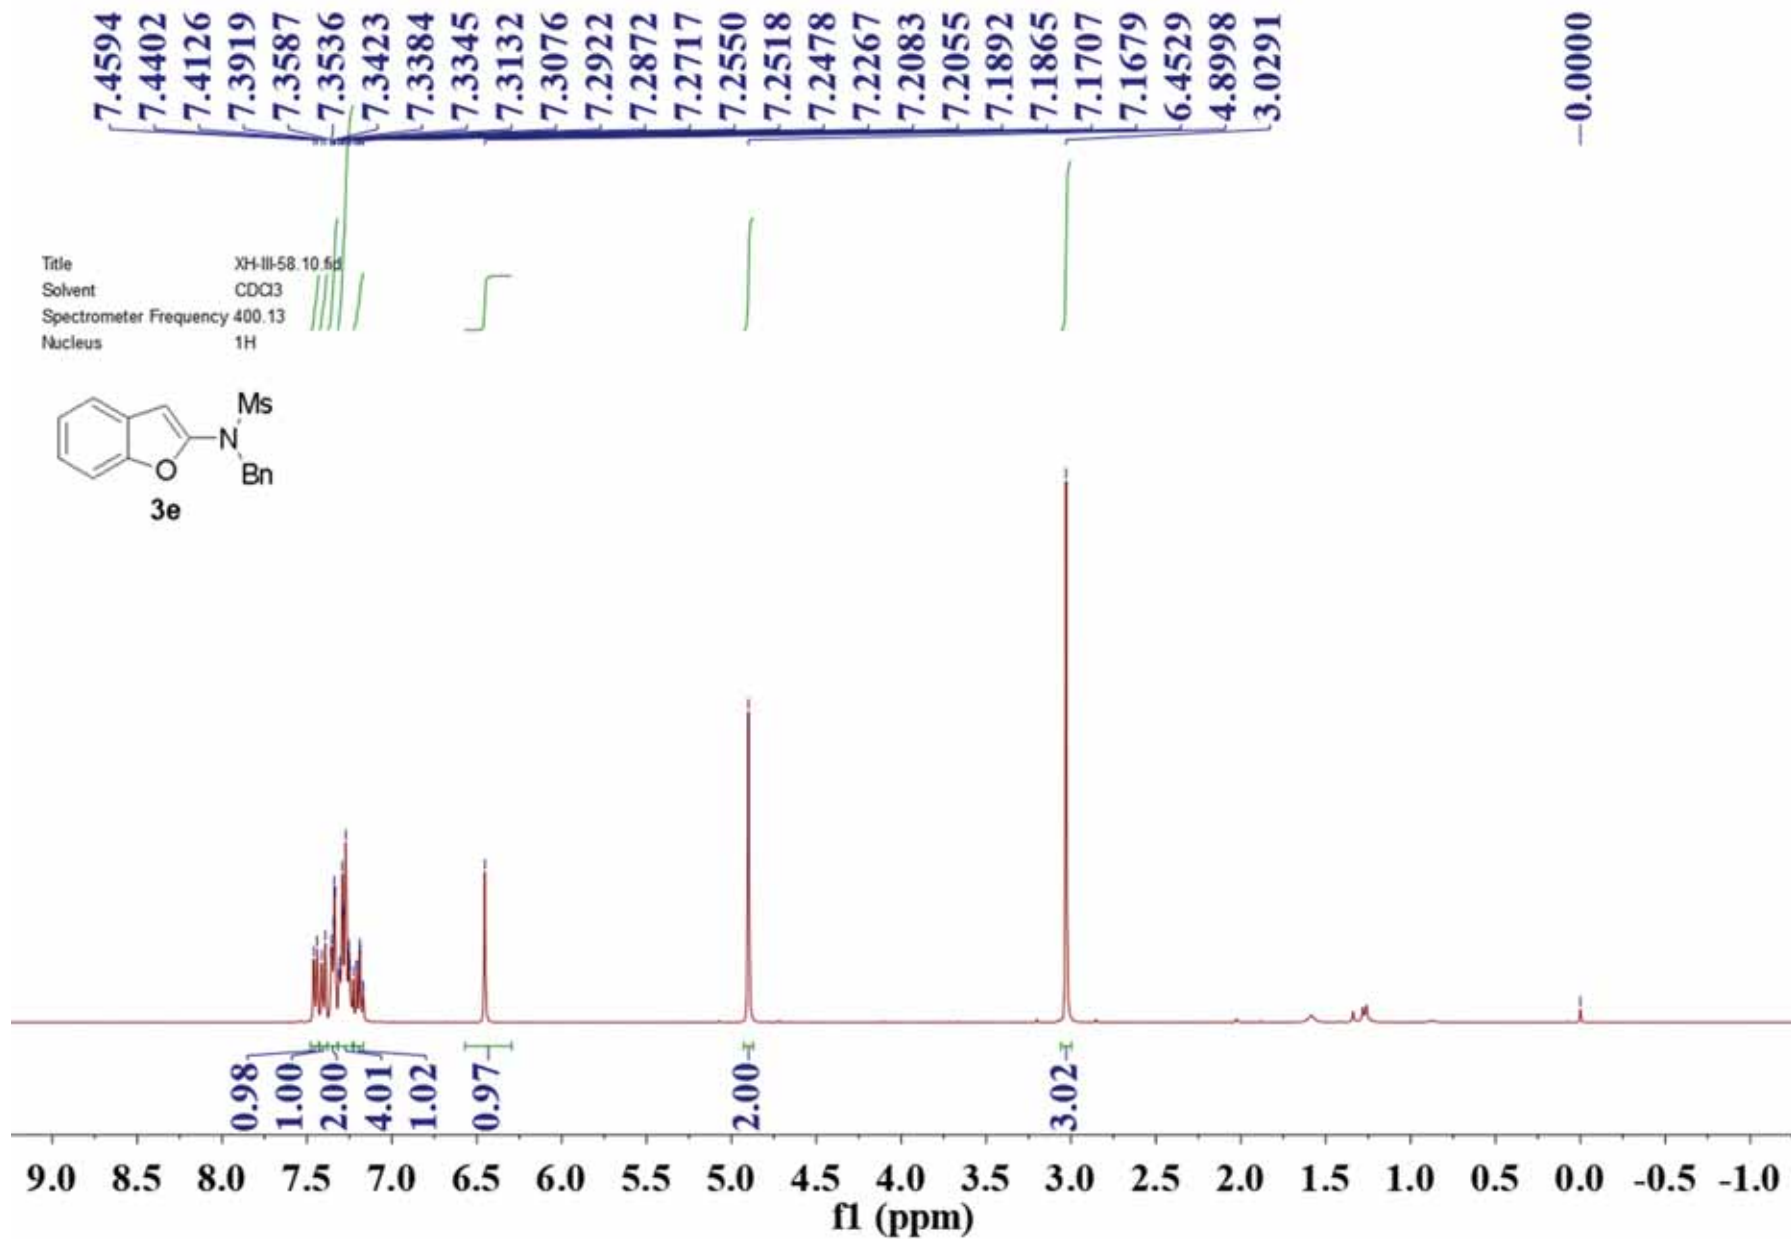

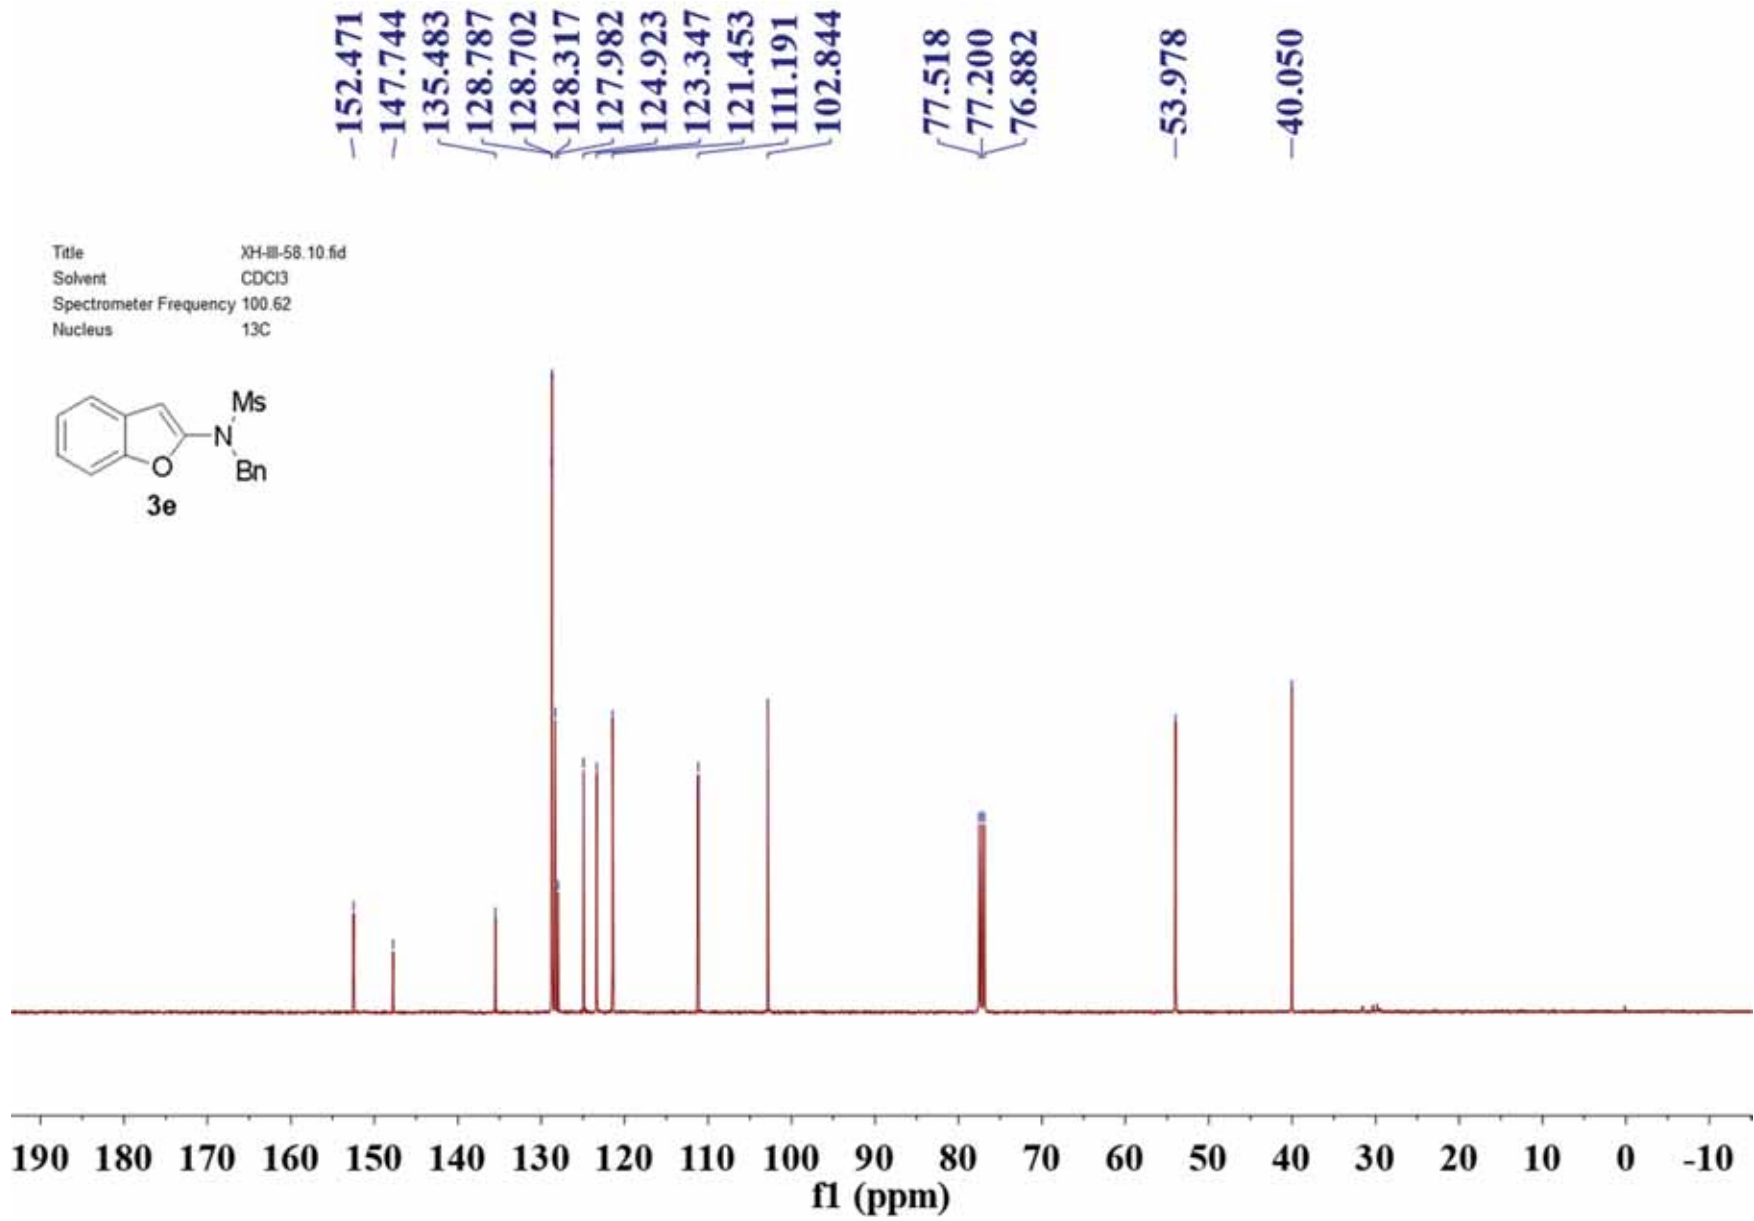

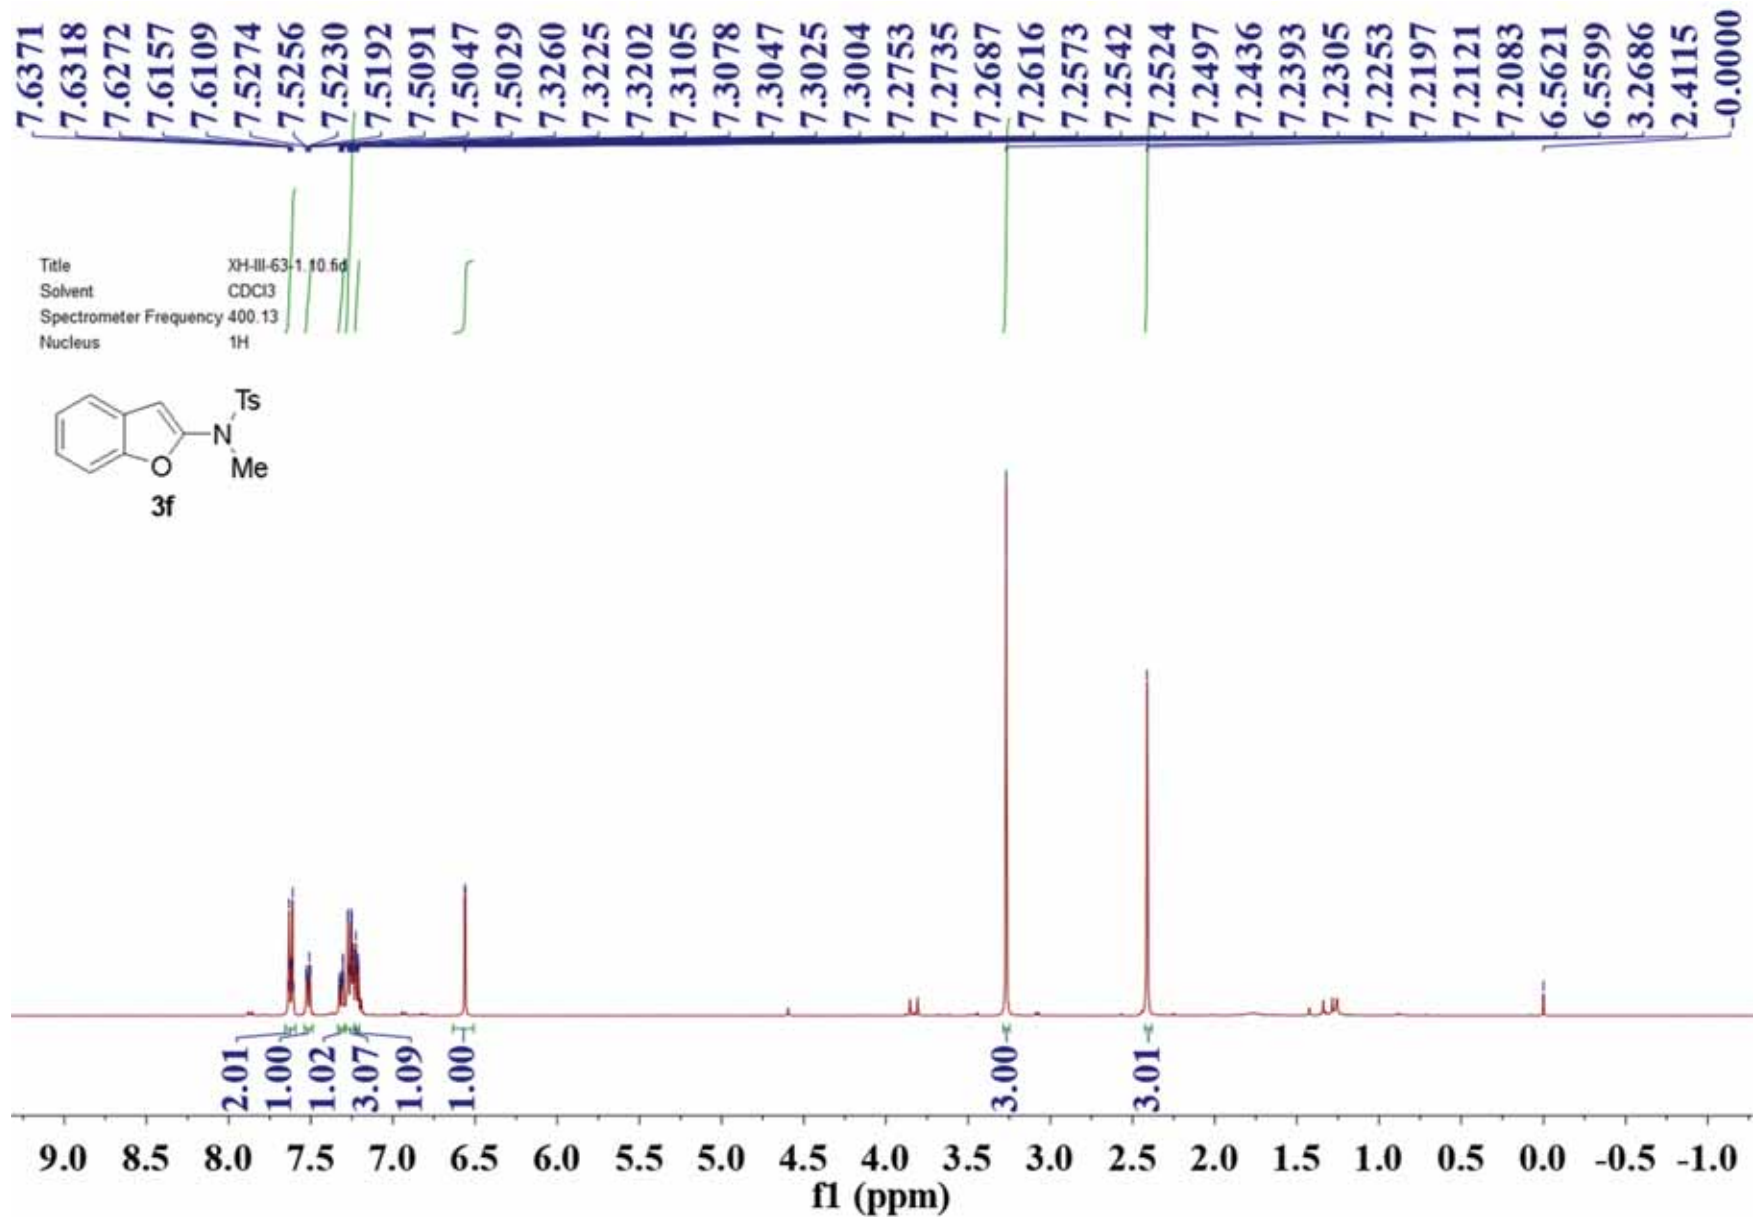

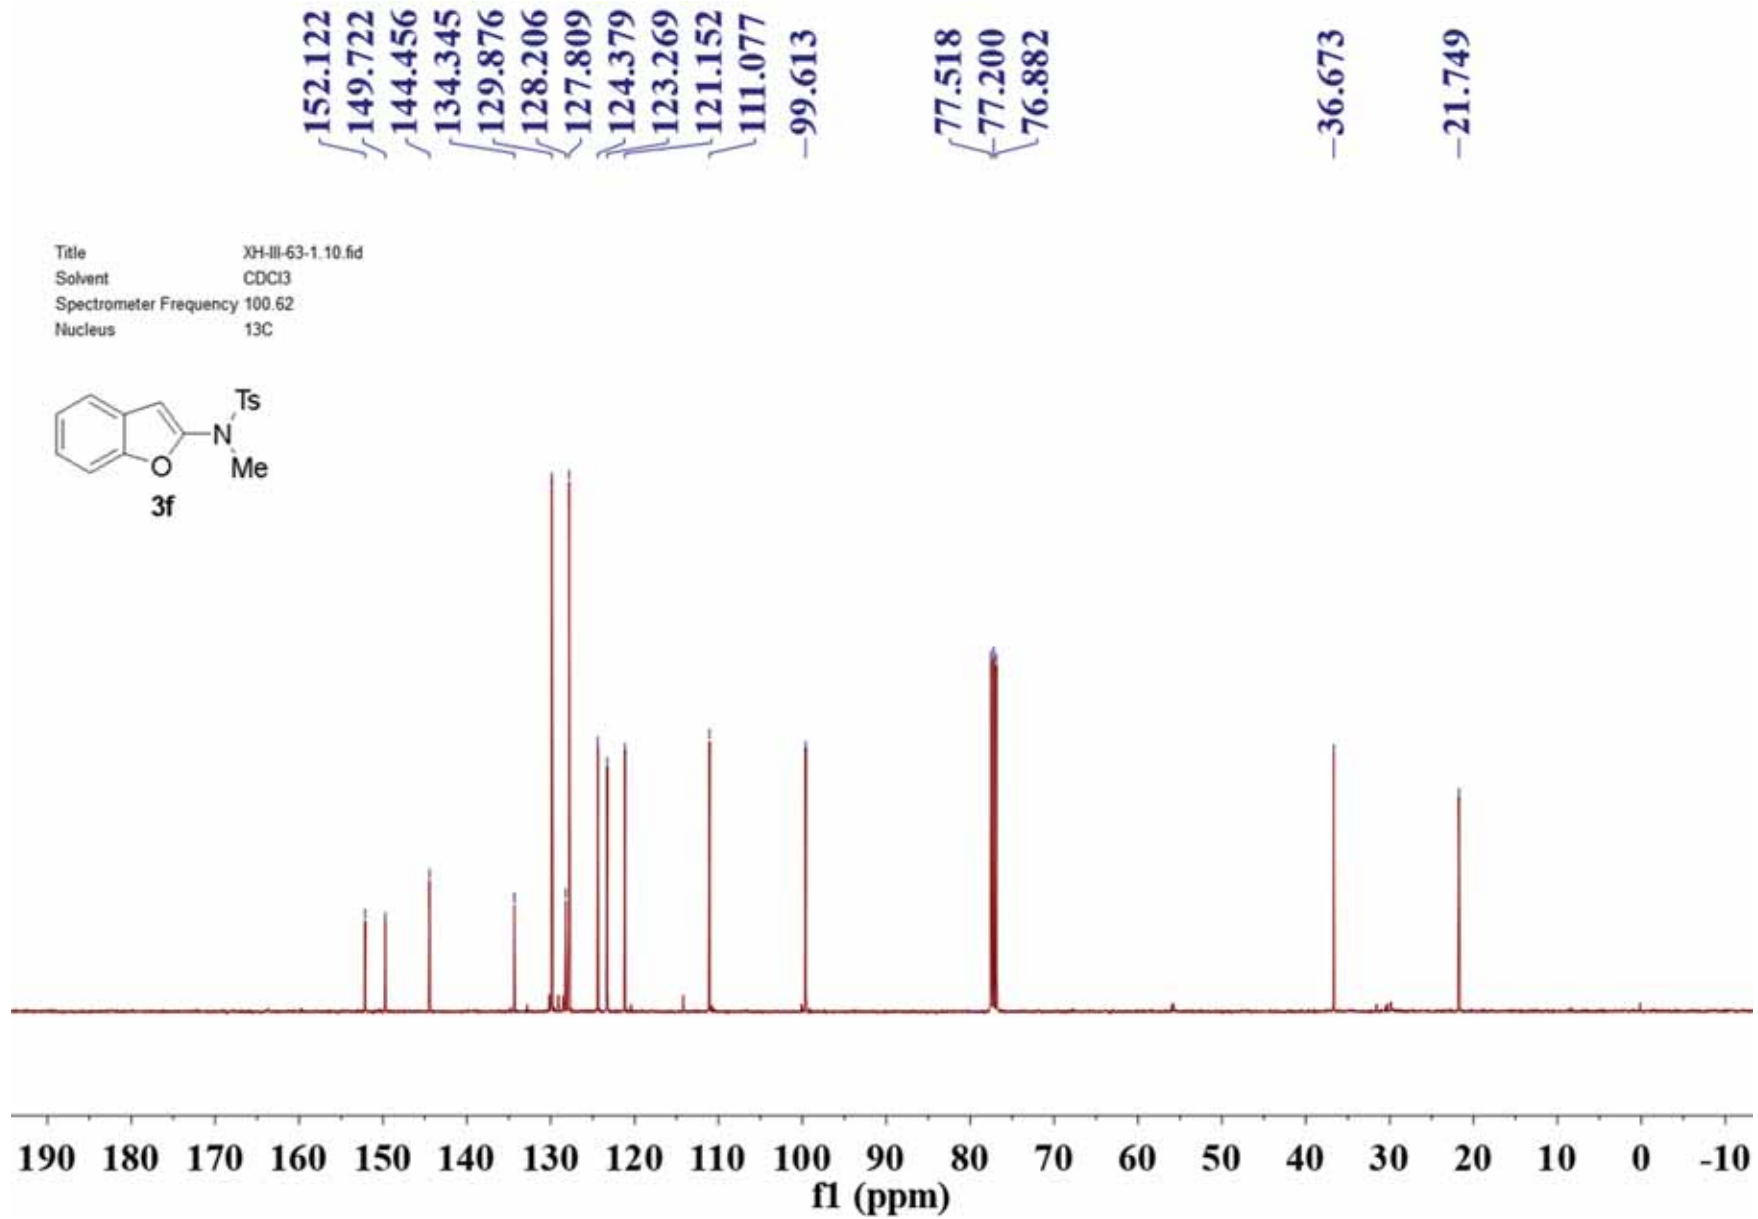



7.6522  
 7.6315  
 7.5419  
 7.5240  
 7.5210  
 7.3401  
 7.3200  
 7.2791  
 7.2648  
 7.2583  
 7.2505  
 7.2455  
 7.2389  
 7.2350  
 7.2199  
 7.2168  
 7.2018  
 7.1988  
 6.6159  
 6.6141  
 3.5844  
 3.5665  
 3.5482  
 2.4177  
 1.6023  
 1.5838  
 1.5655  
 1.5473  
 1.5291  
 1.5108  
 0.9381  
 0.9197  
 0.9012  
 -0.0000

Title DLX12-64A.10.fid  
 Solvent CDCl3  
 Spectrometer Frequency 400.13  
 Nucleus 1H

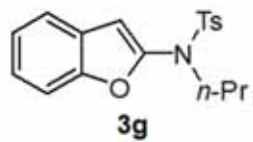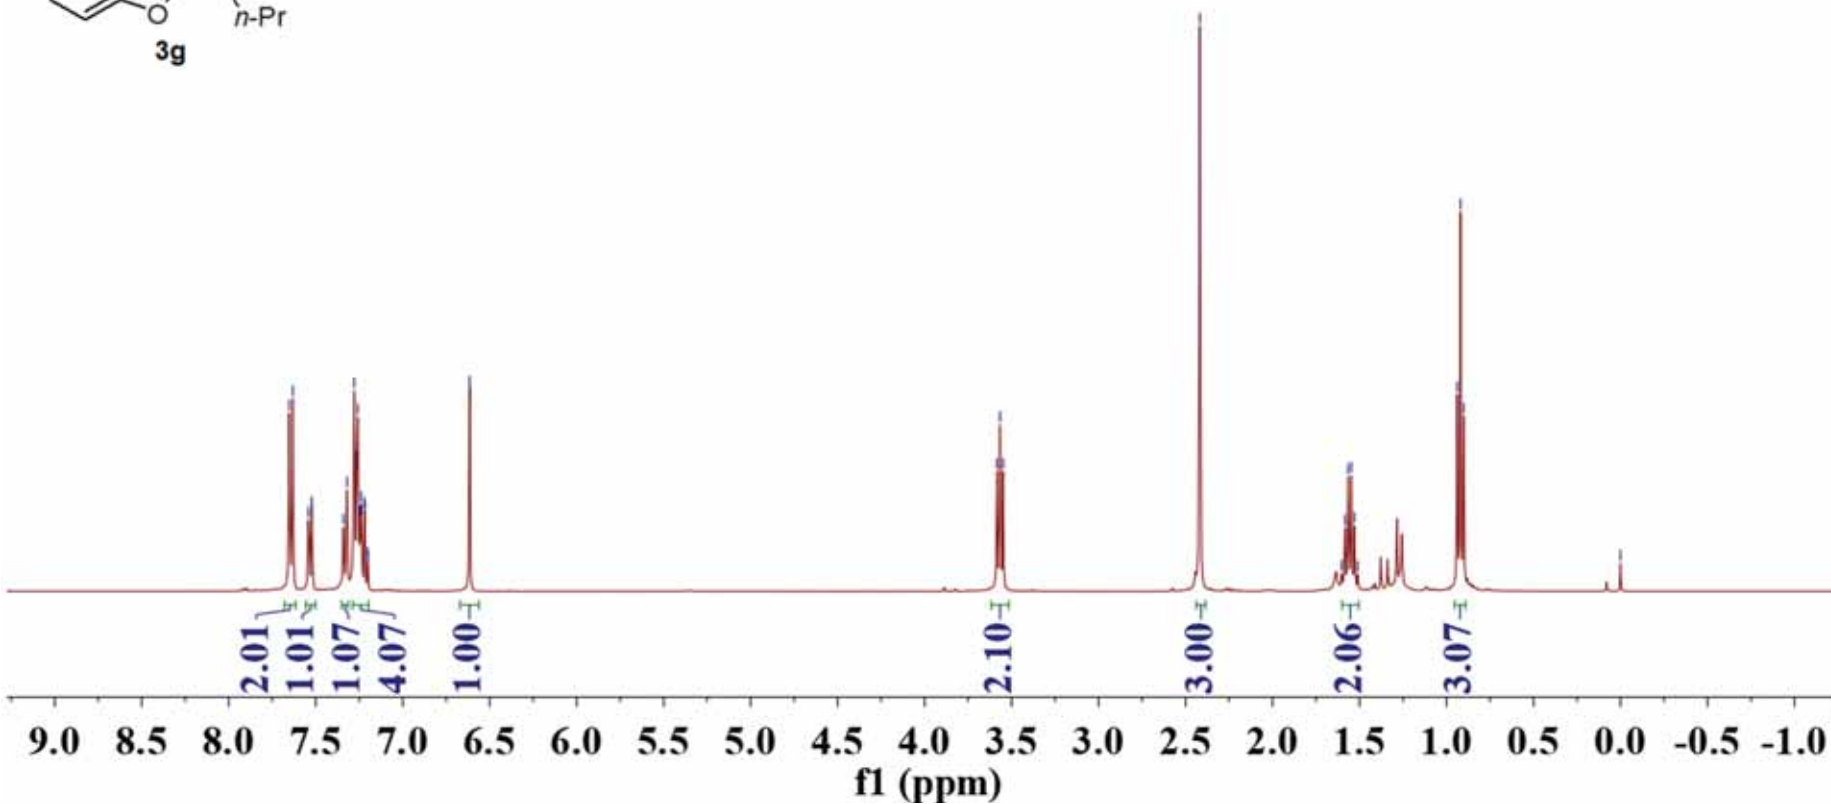

Title DLX12-64A.10.fid  
Solvent CDCl3  
Spectrometer Frequency 100.62  
Nucleus 13C

152.496  
148.126  
144.143  
135.804  
129.814  
128.072  
127.720  
124.670  
123.190  
121.277  
111.220  
102.971

77.518  
77.200  
76.882

-51.422

21.886  
21.751  
-11.098

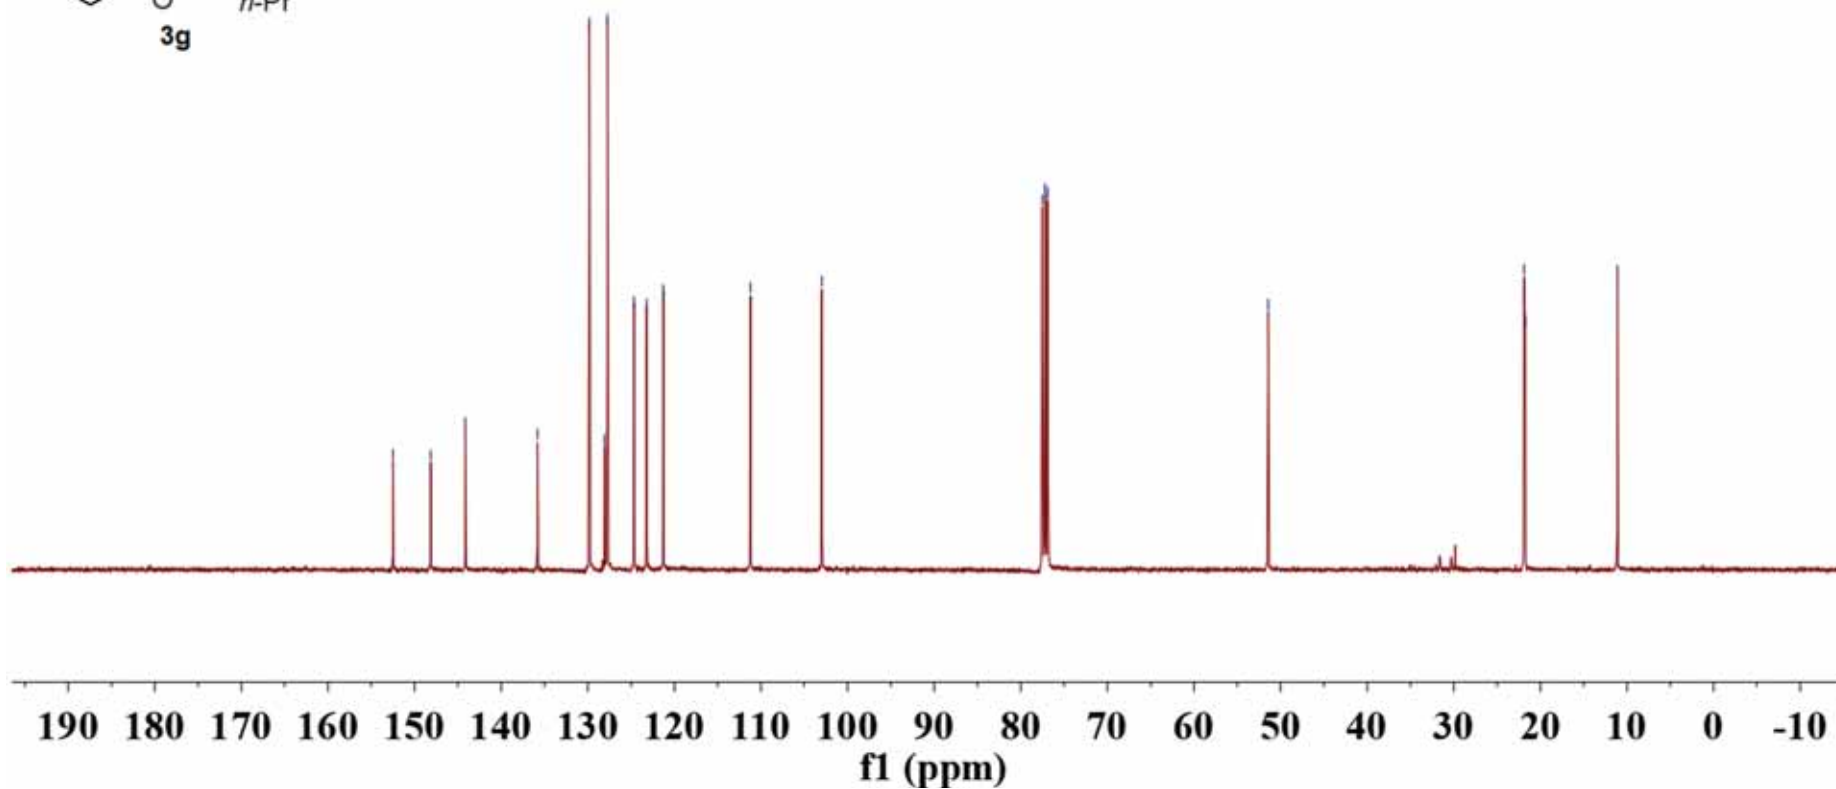

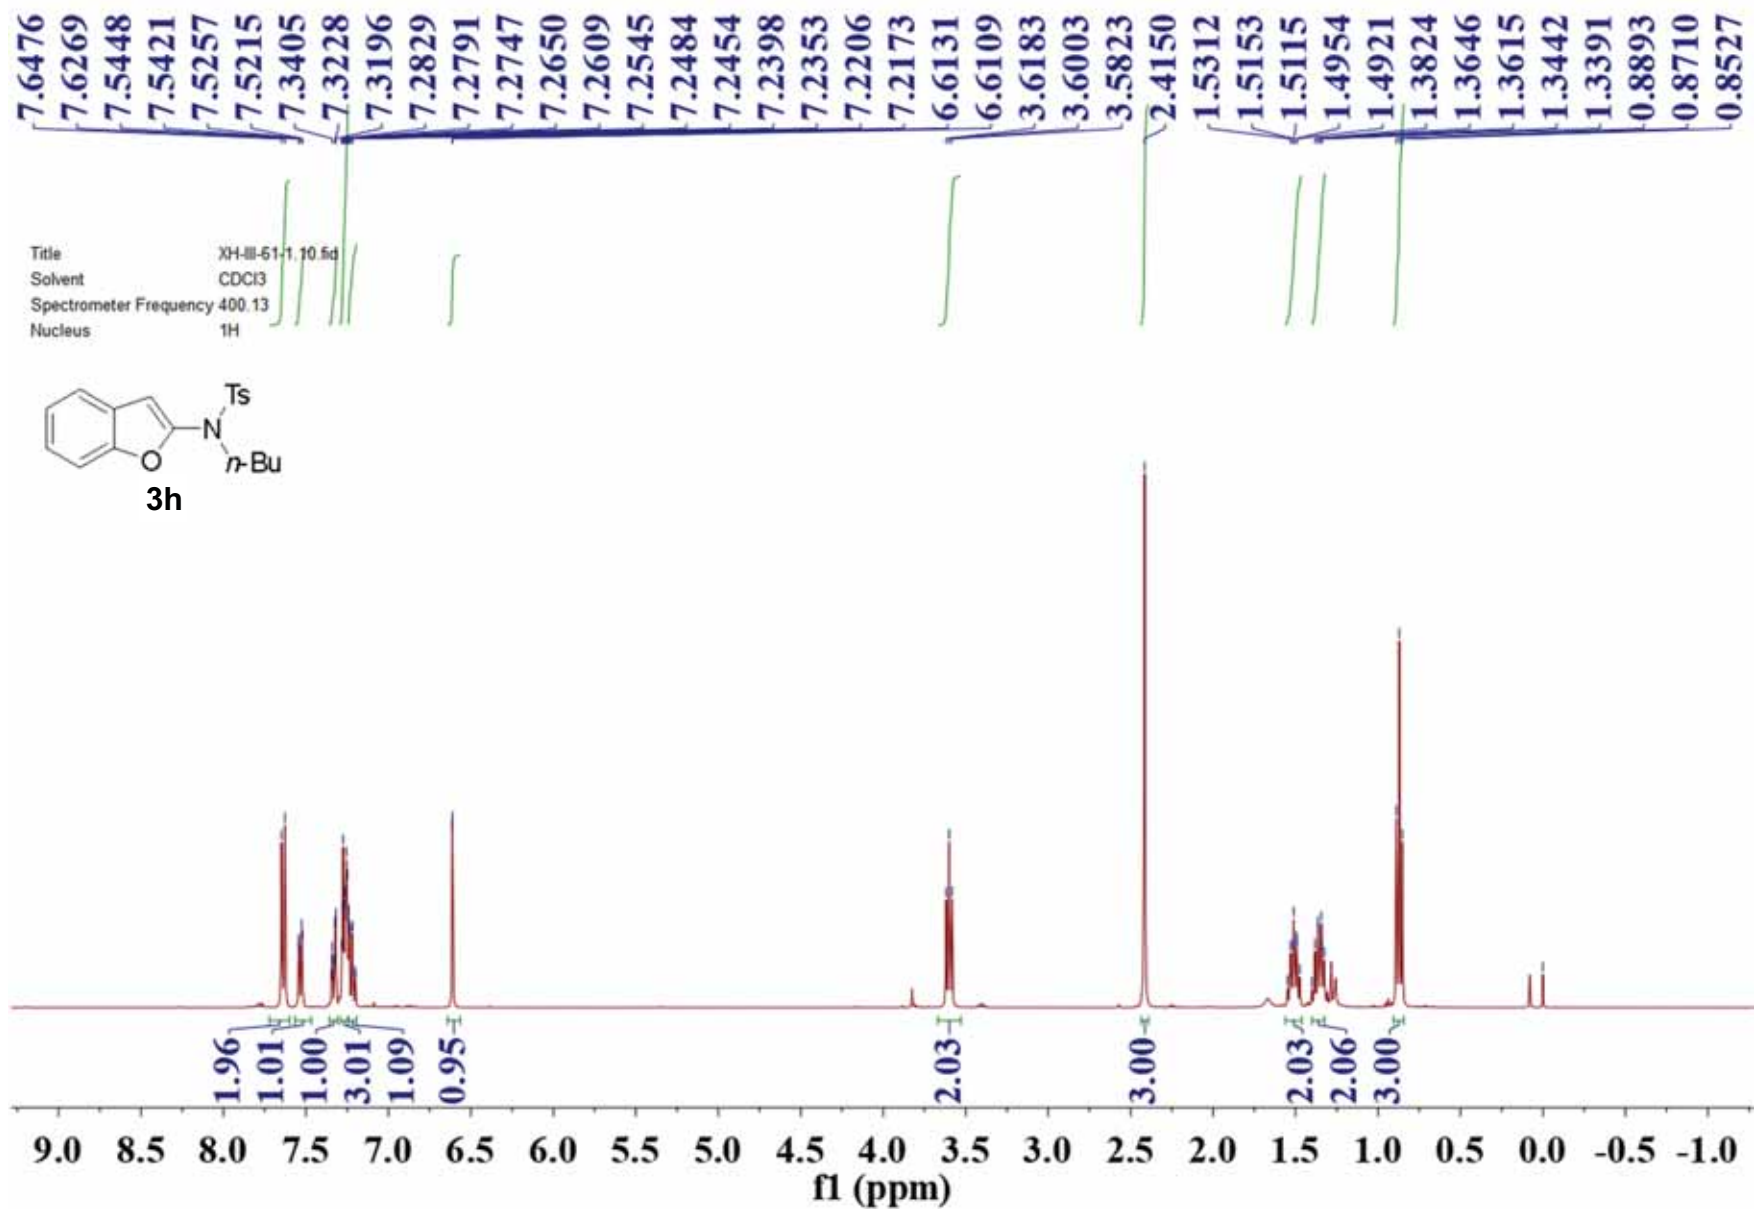

152.503  
 148.156  
 144.136  
 135.783  
 129.807  
 128.086  
 127.720  
 124.656  
 123.187  
 121.277  
 111.219  
 102.973  
  
 77.518  
 77.200  
 76.882  
  
 -49.492  
  
 -30.564  
 -21.738  
 -19.720  
 -13.740

Title XH-III-51-1.10.fid  
 Solvent CDCl3  
 Spectrometer Frequency 100.62  
 Nucleus 13C

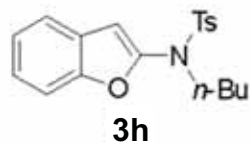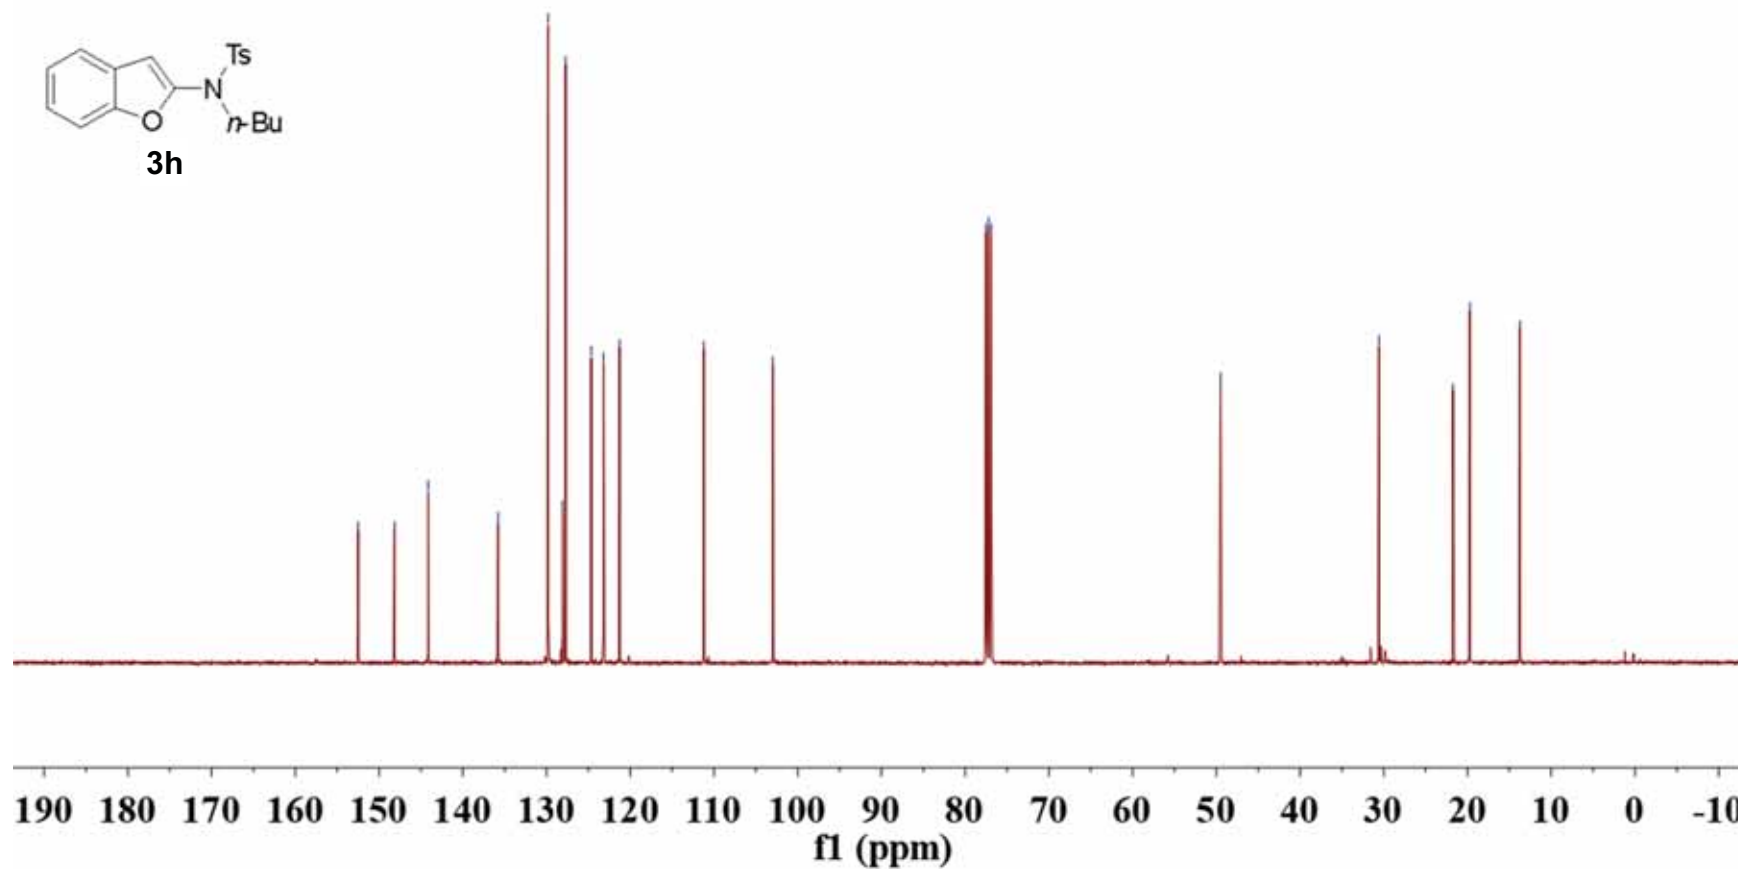

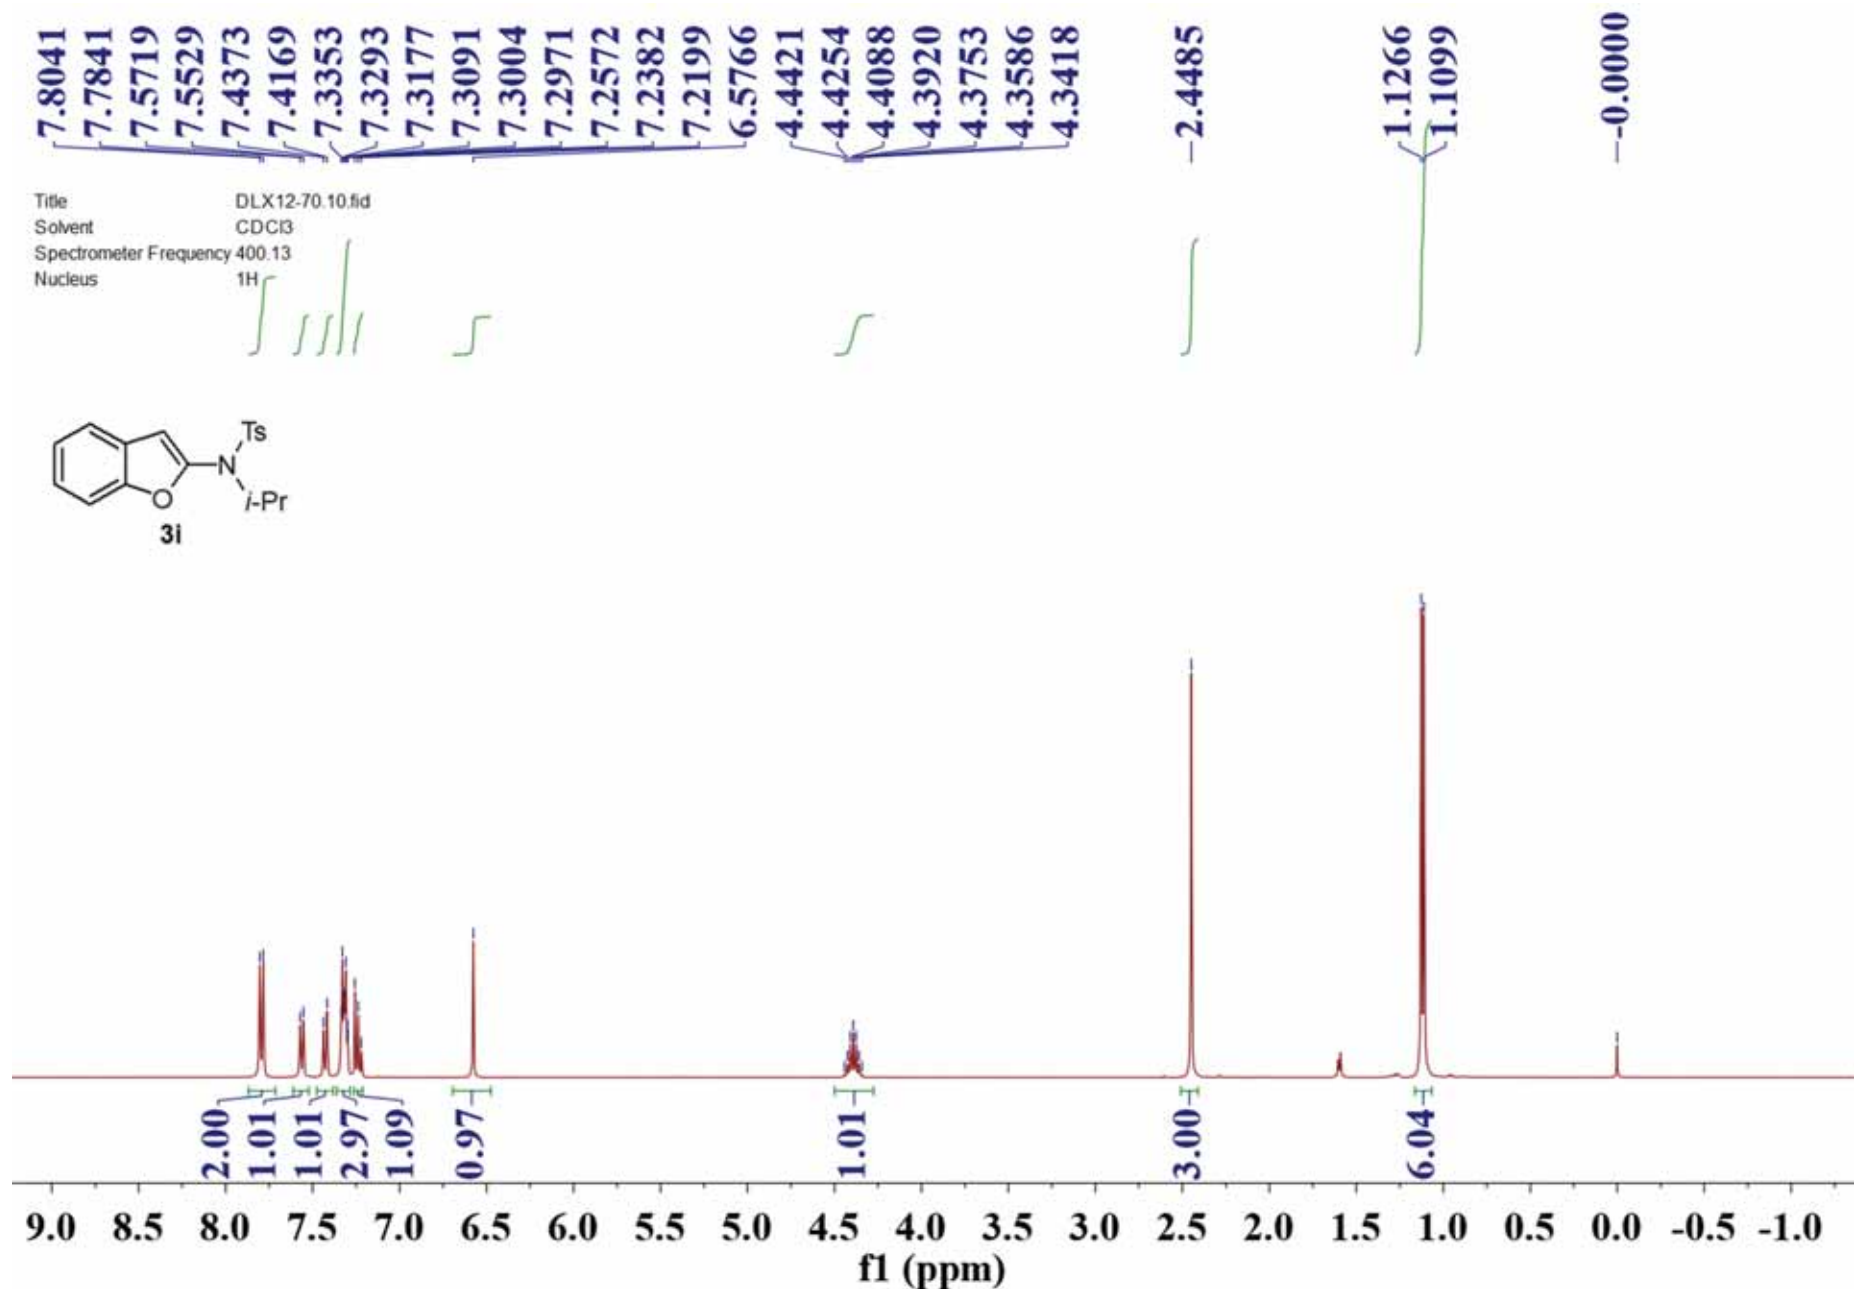

Title DLX12-70.11.fid  
Solvent CDCl3  
Spectrometer Frequency 100.62  
Nucleus 13C

153.136  
145.514  
143.944  
137.506  
129.813  
127.826  
127.774  
125.177  
123.063  
121.455  
111.586  
106.811

77.518  
77.200  
76.883

-52.449

21.940  
21.789

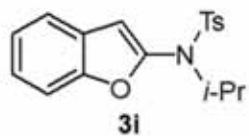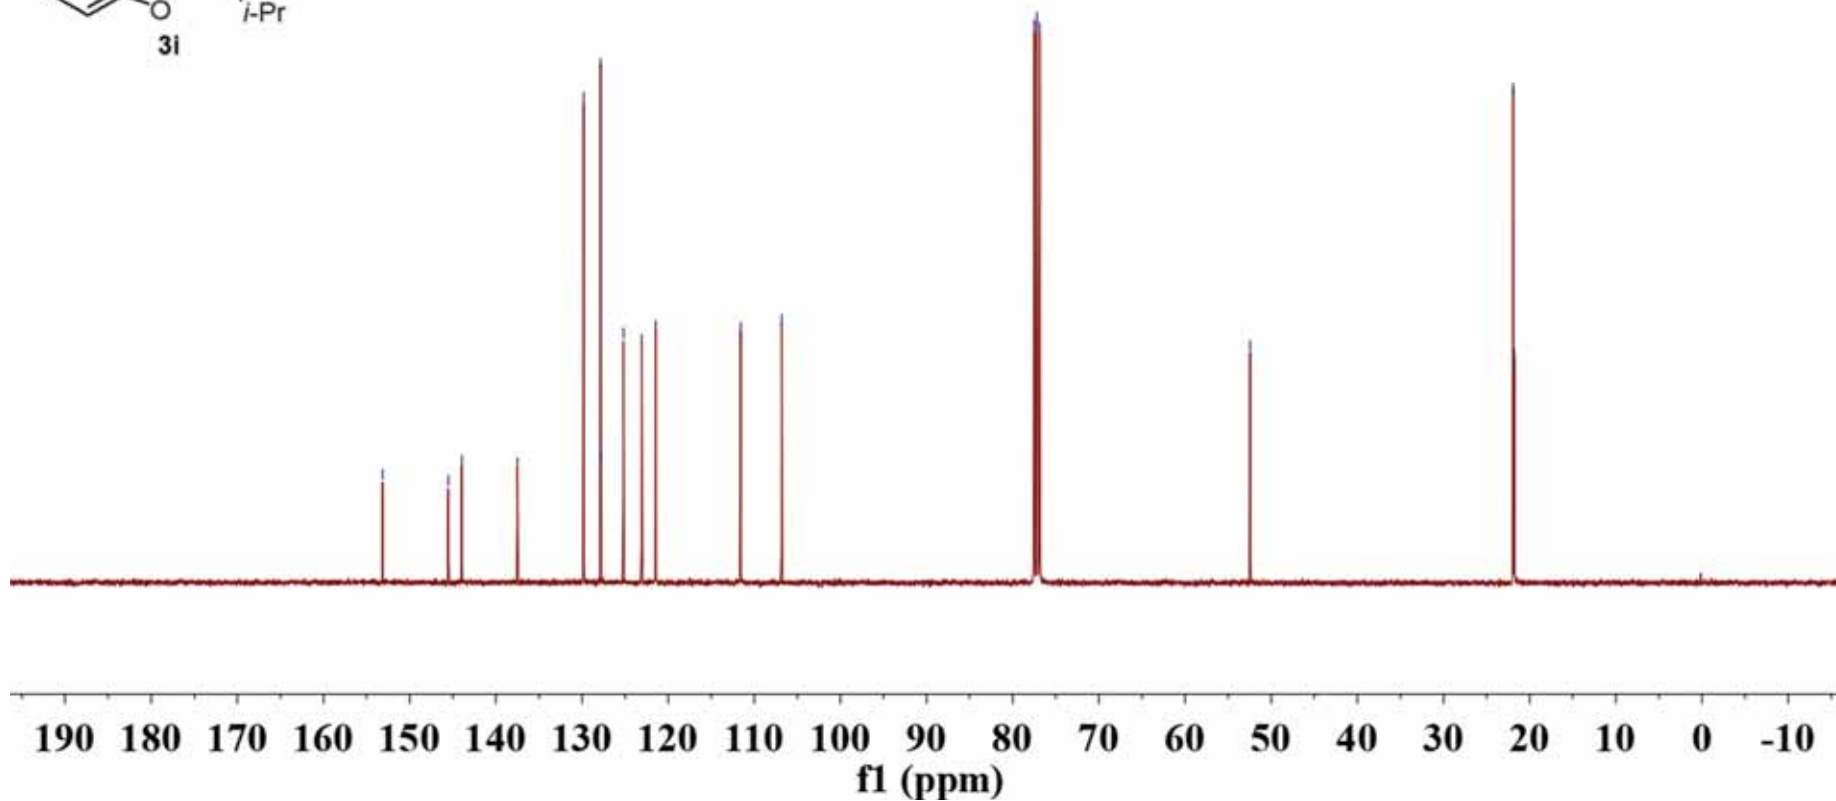

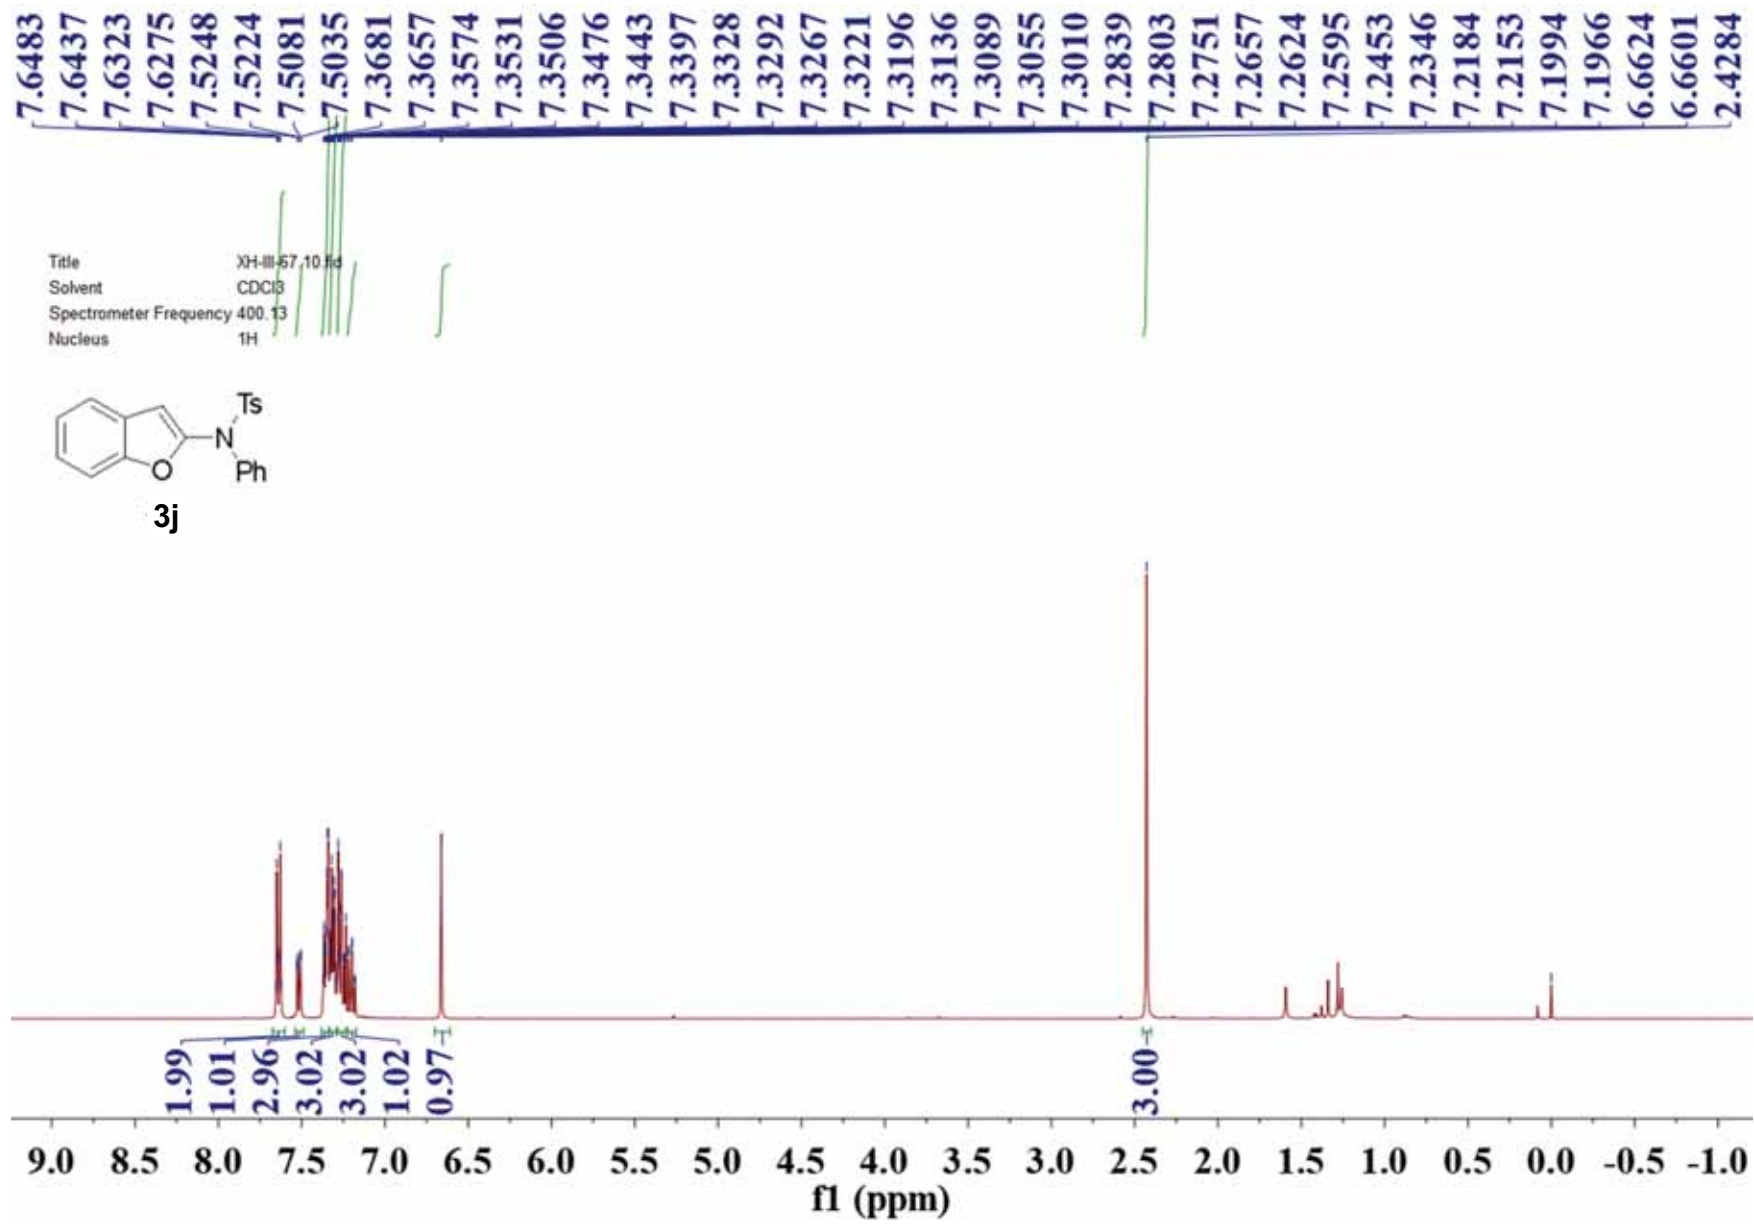

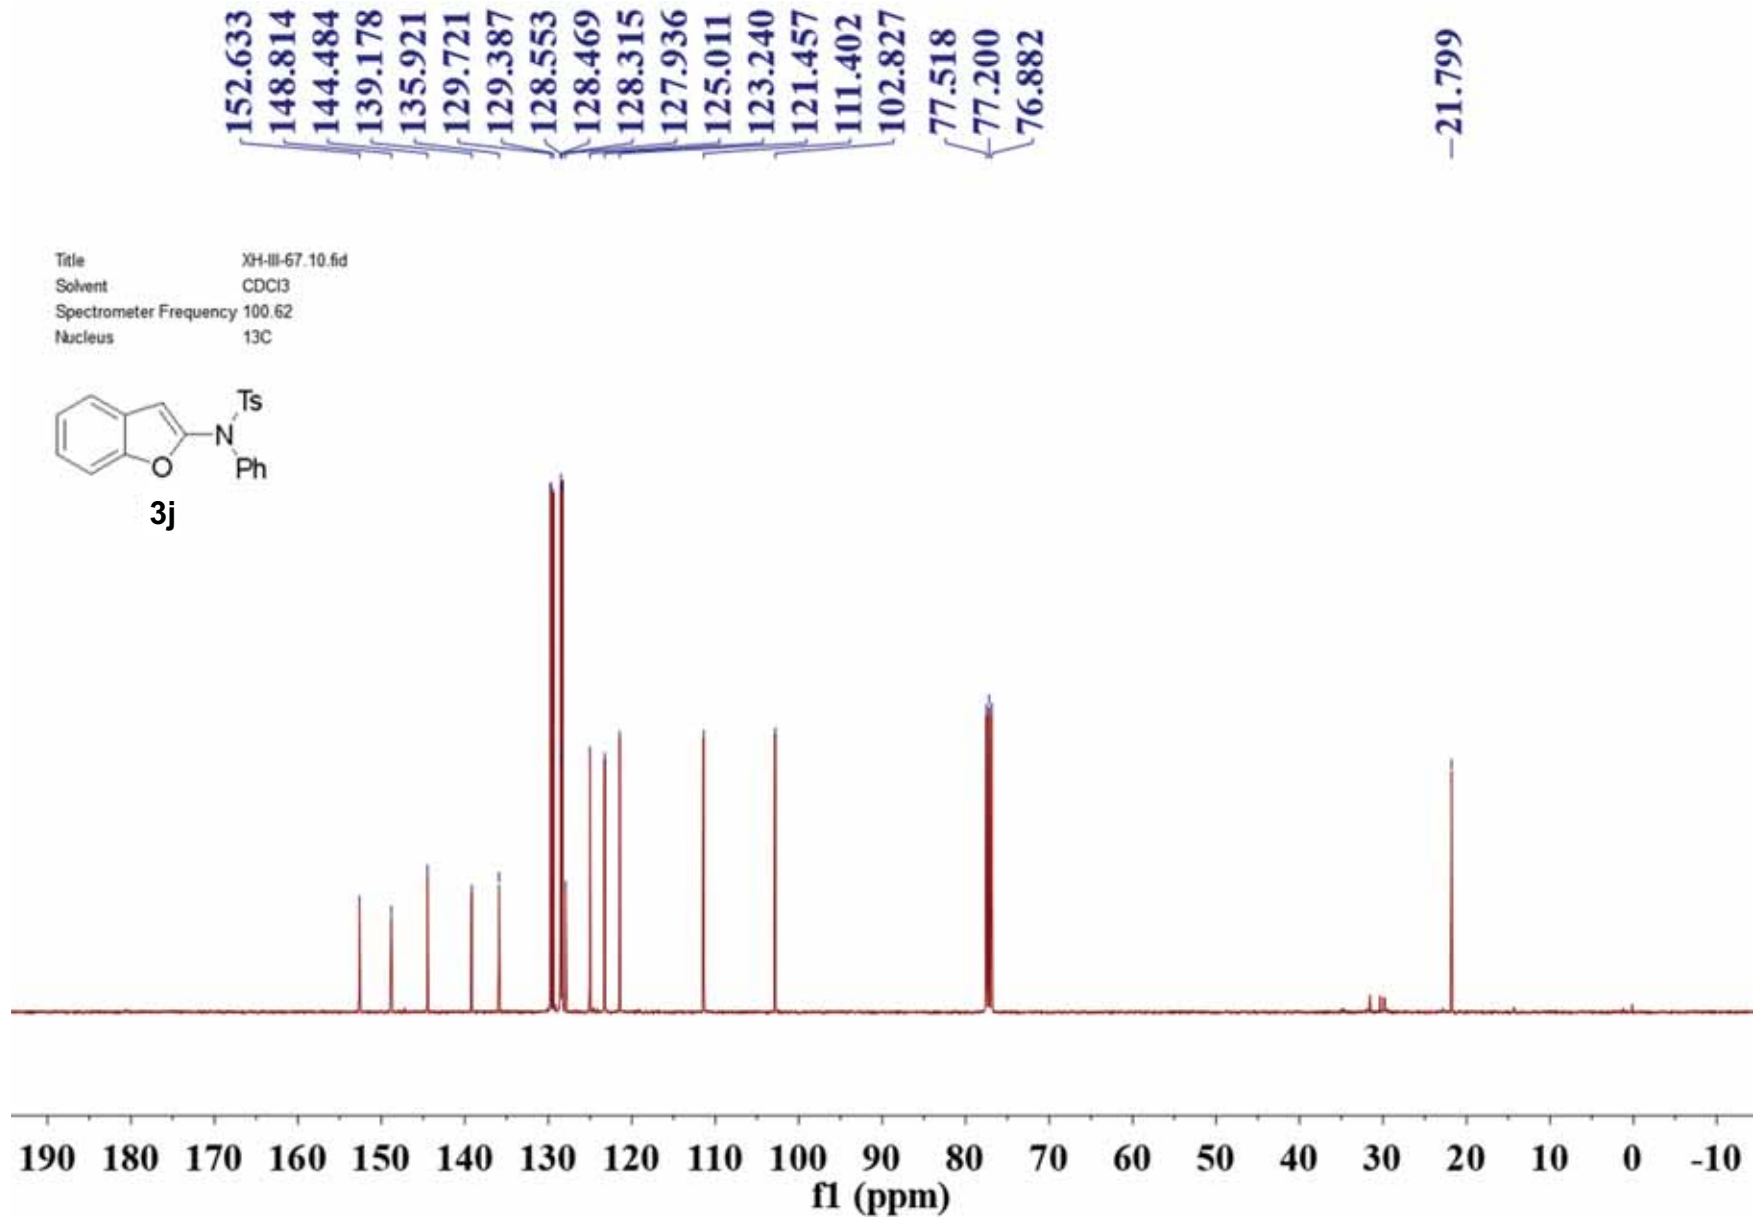



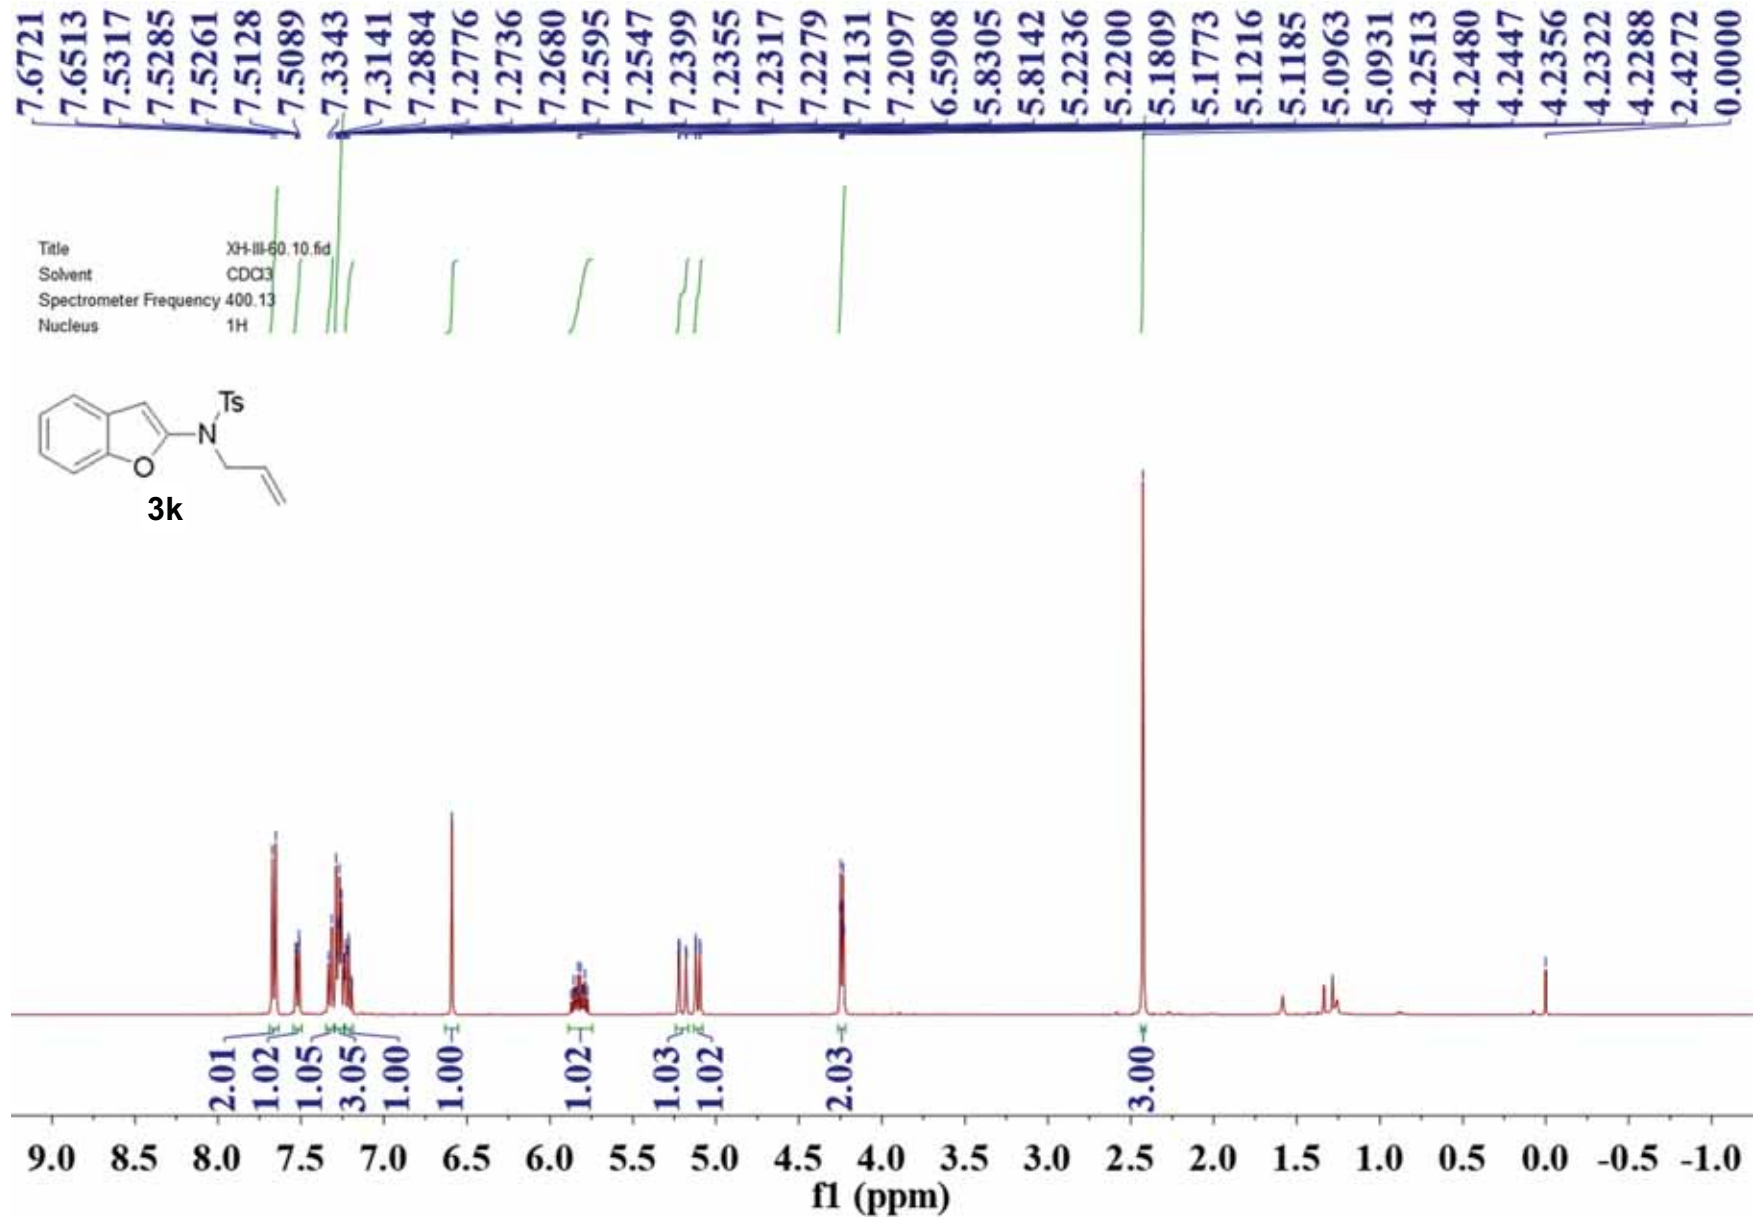

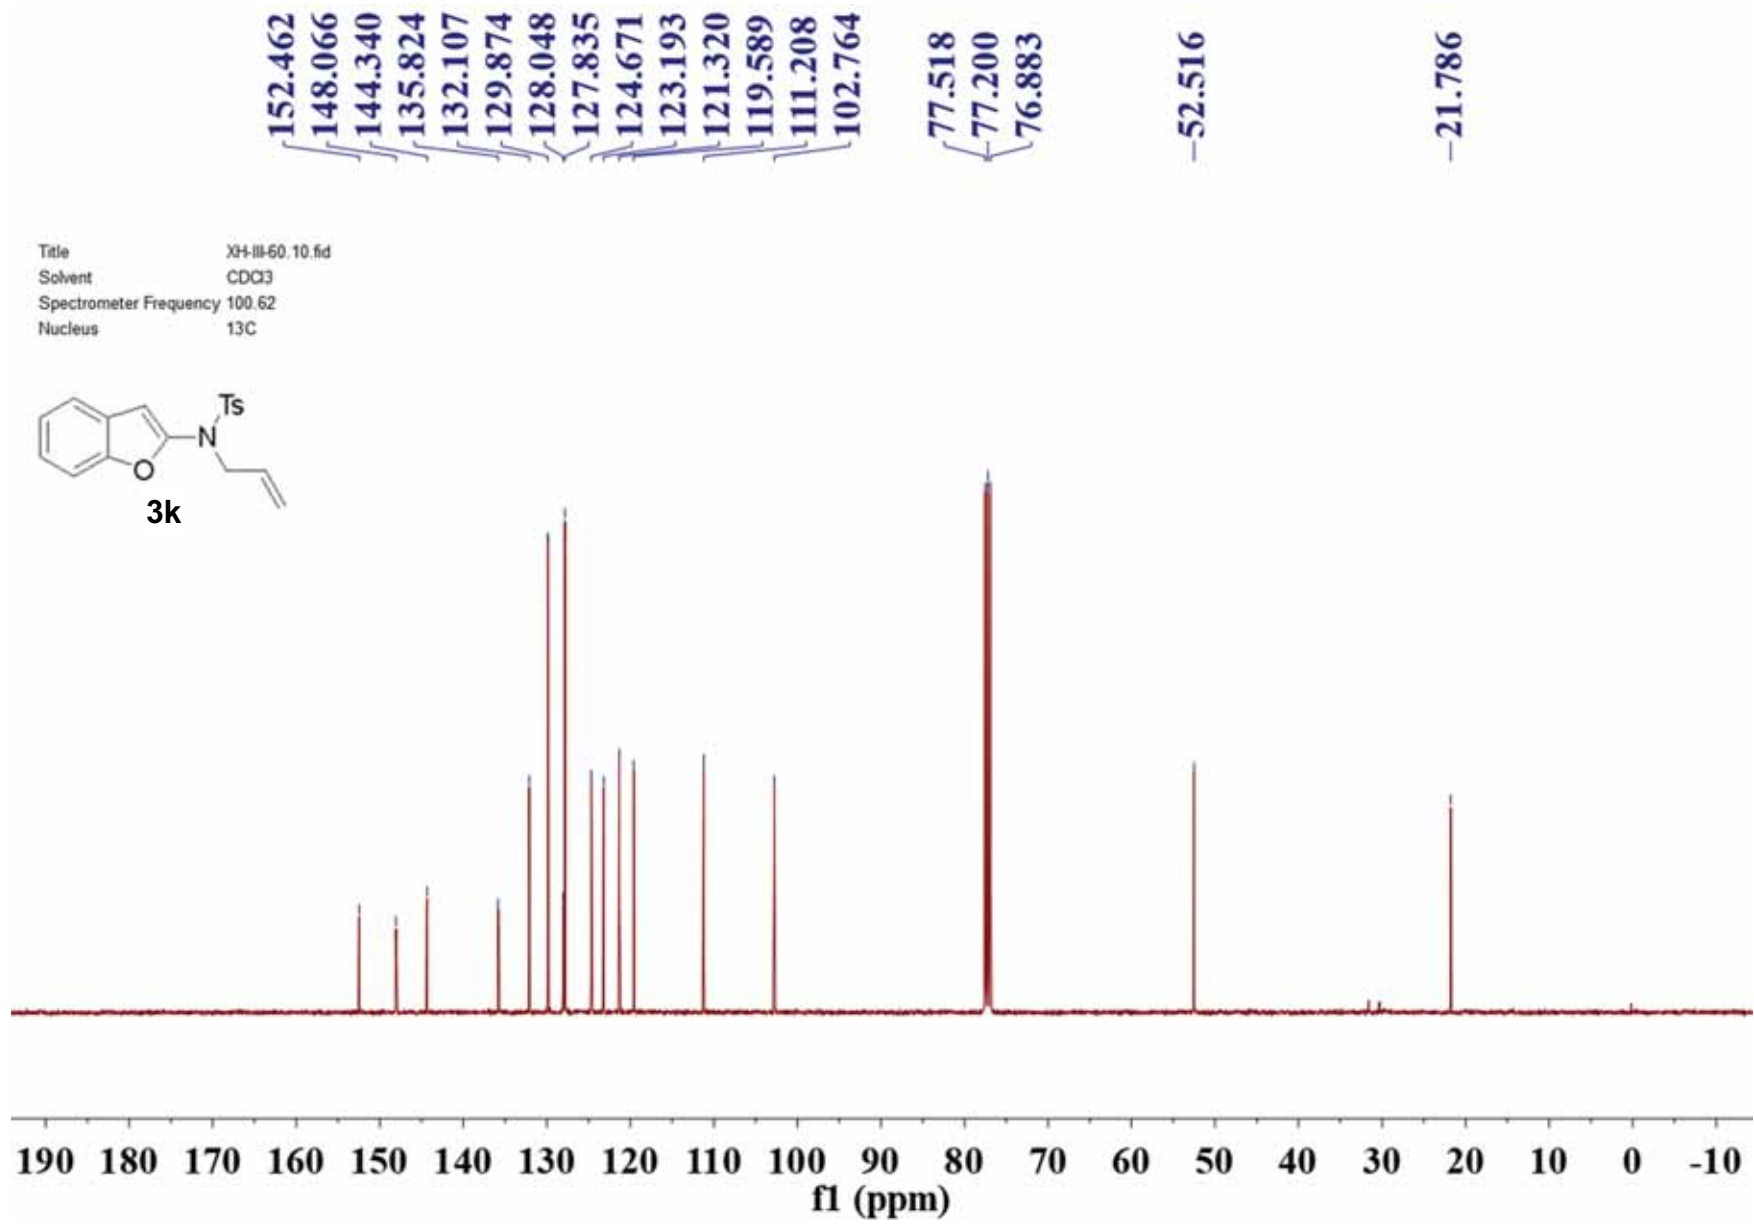

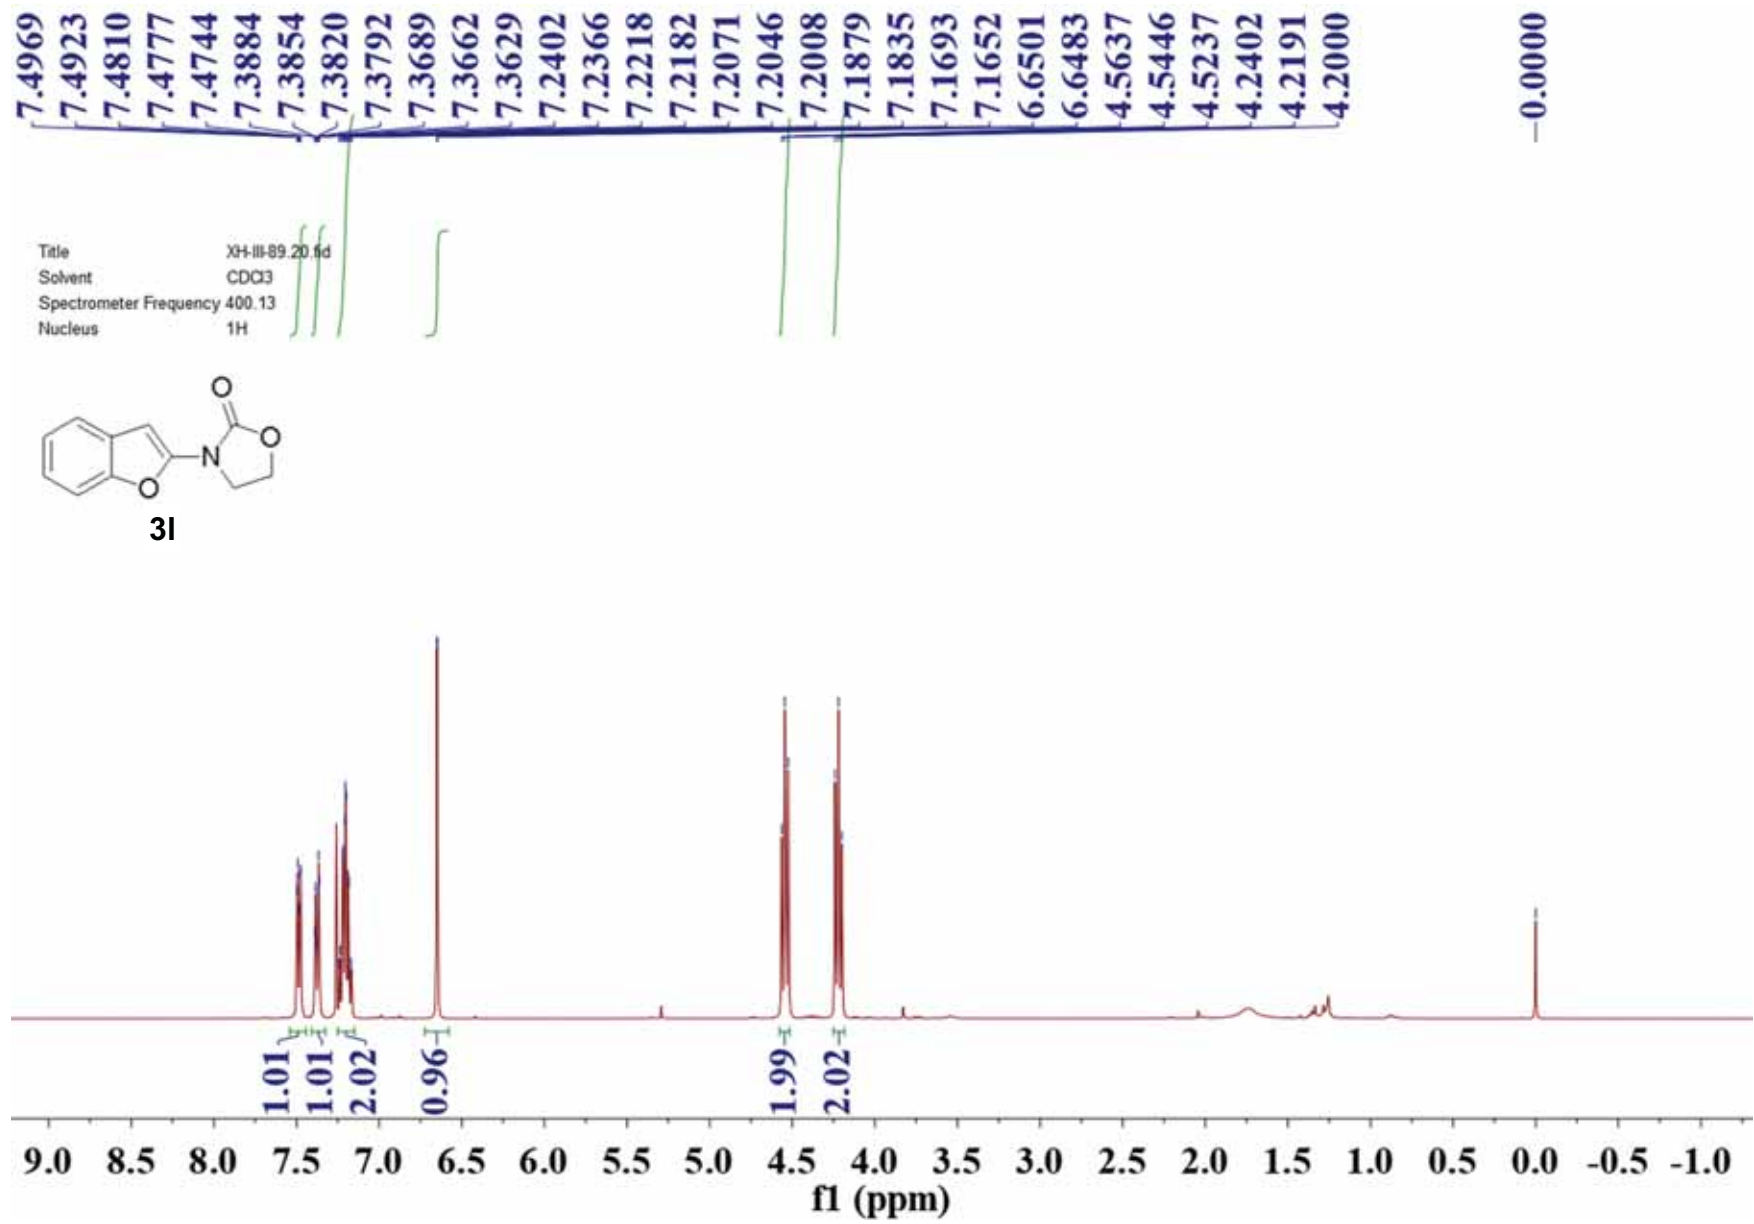

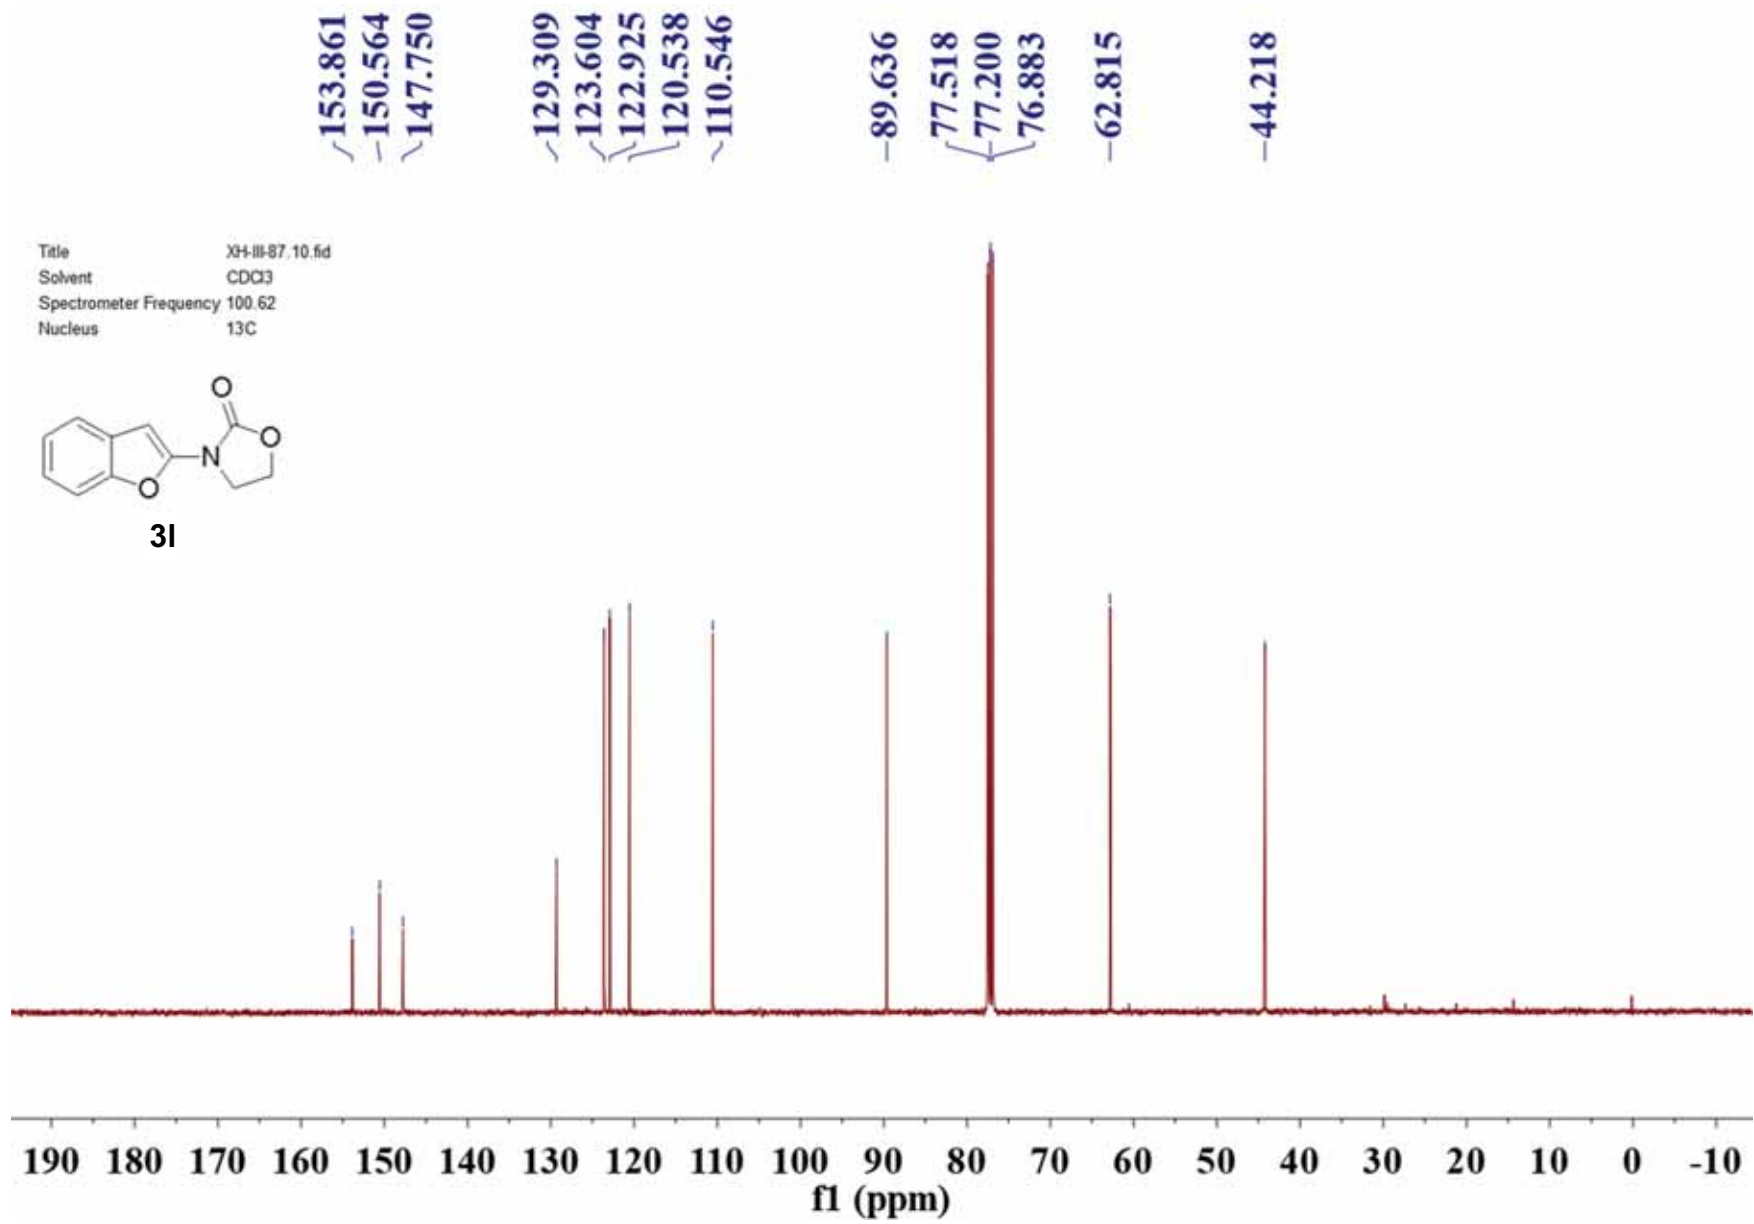

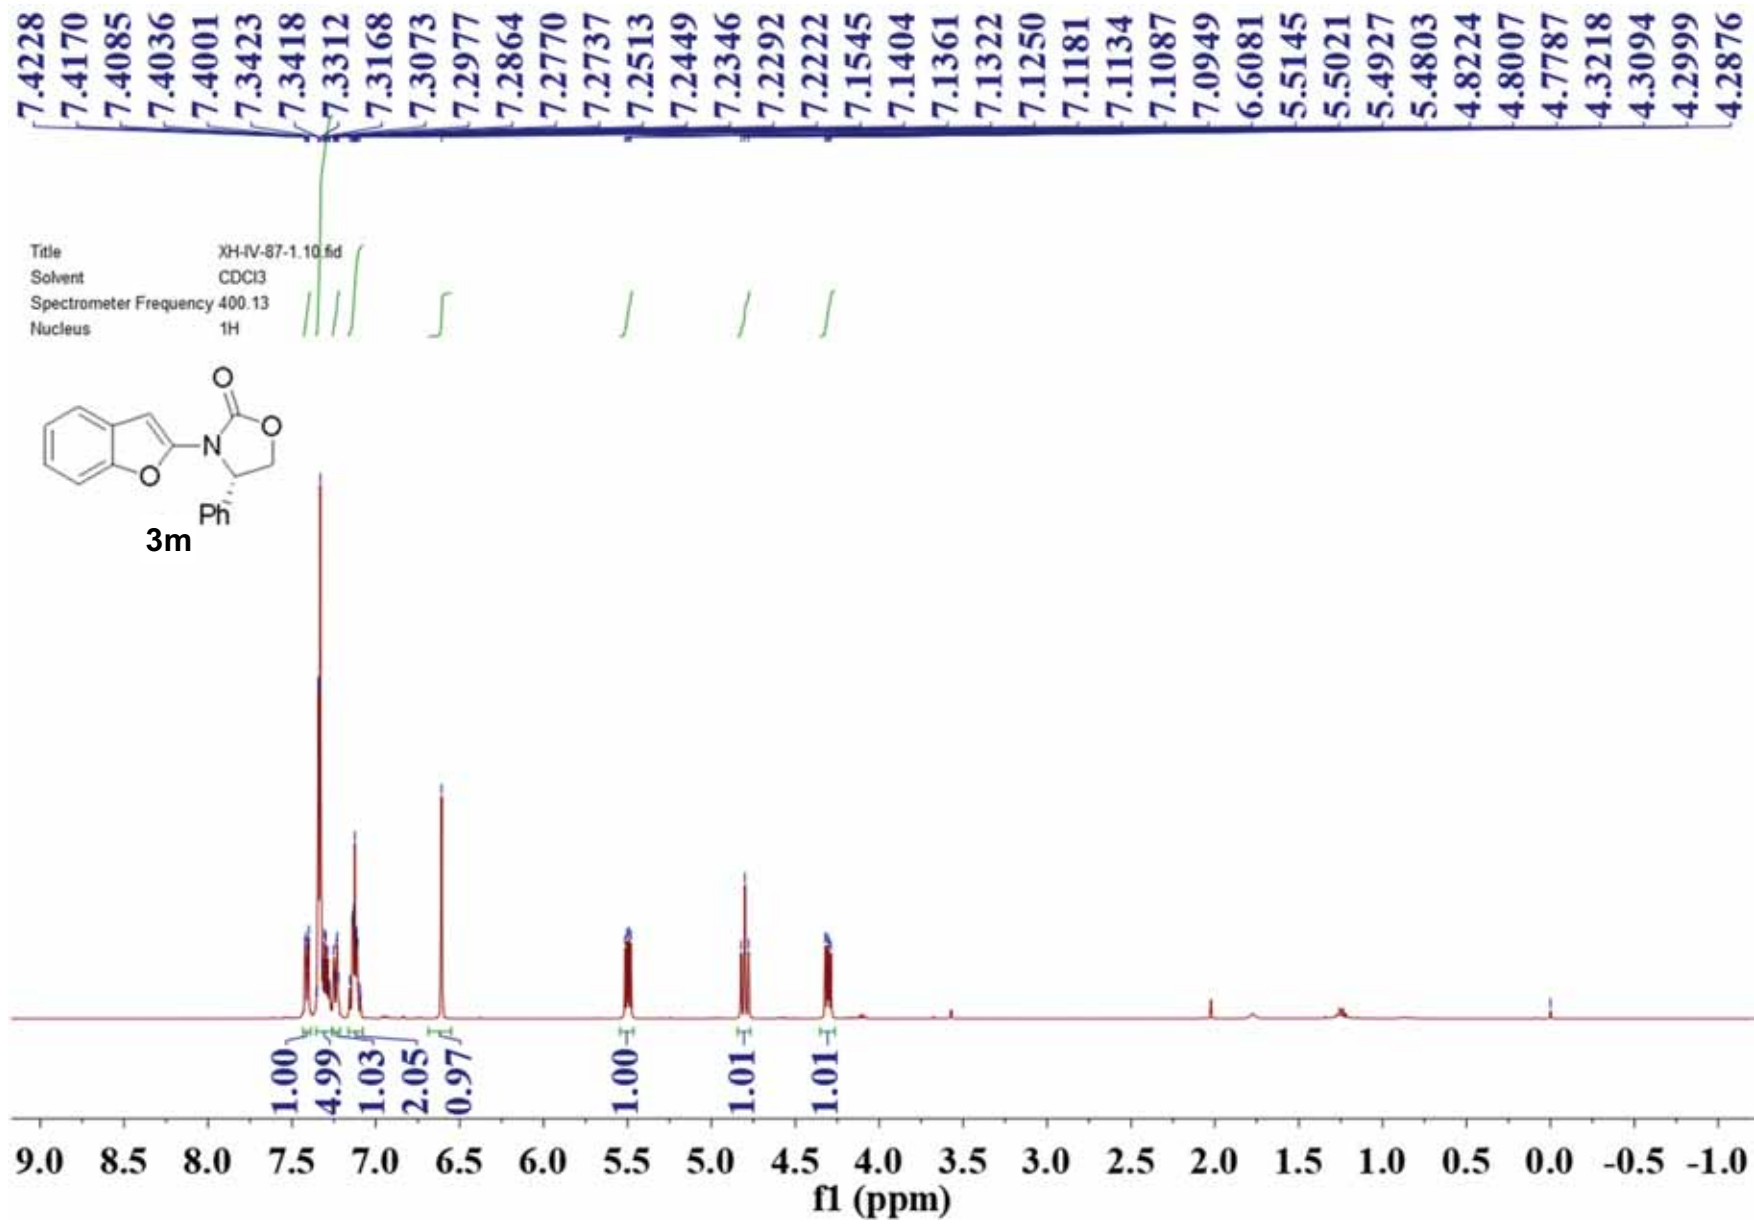

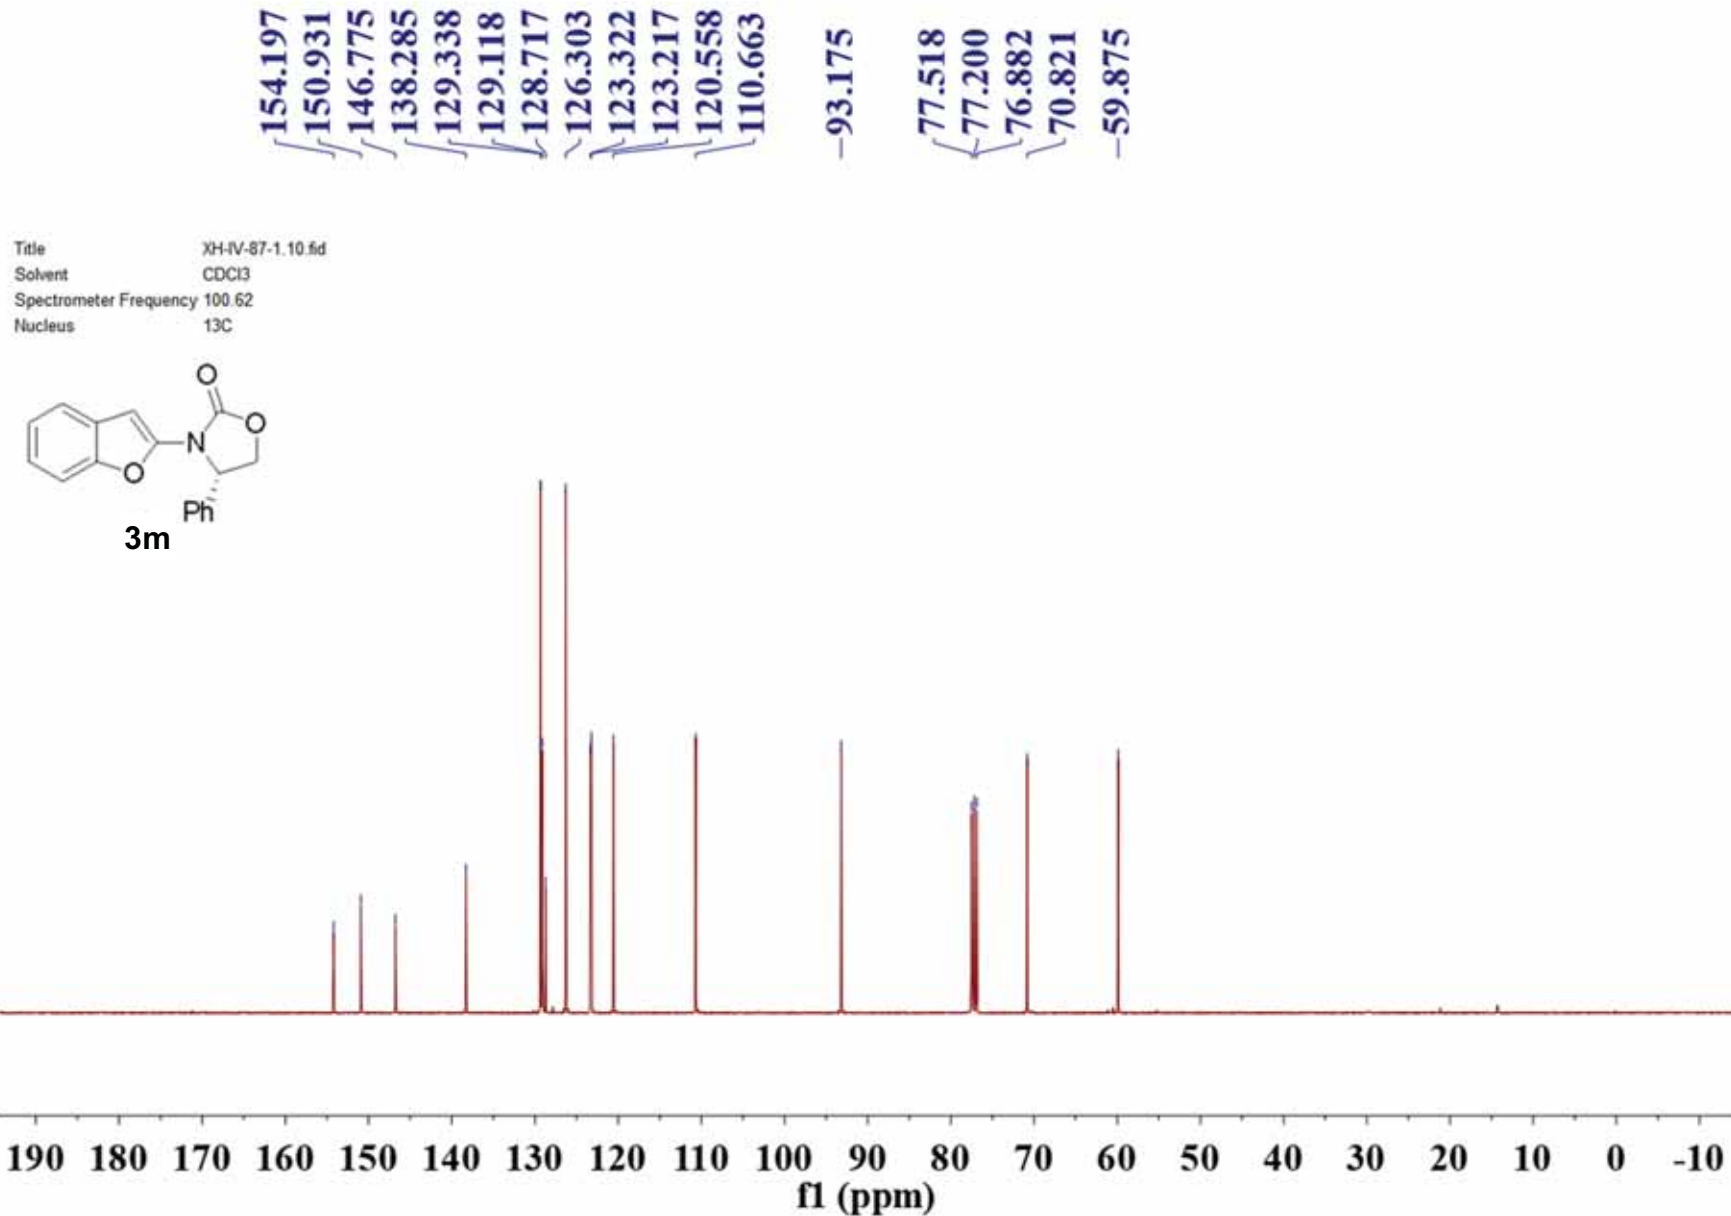

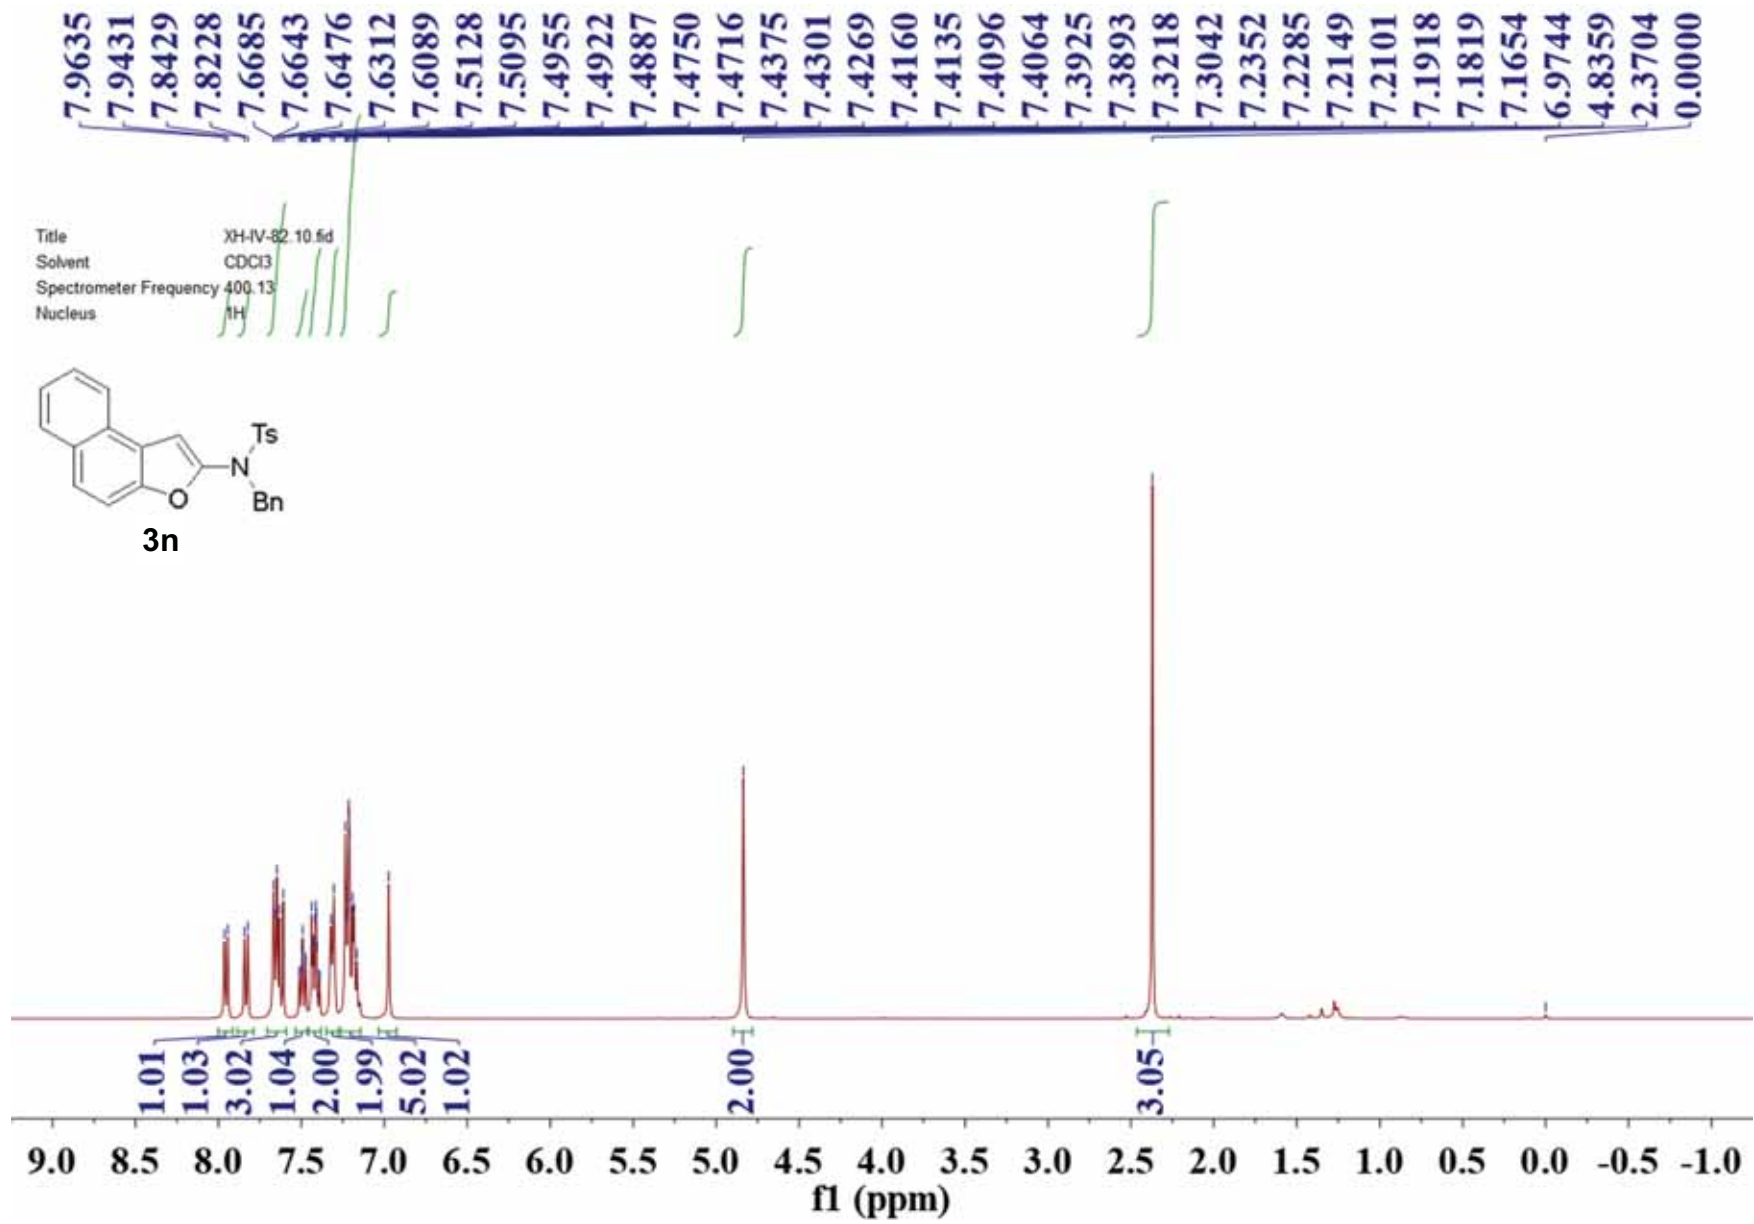

144.335  
 135.801  
 135.434  
 130.253  
 129.893  
 128.793  
 128.612  
 128.072  
 127.742  
 127.503  
 126.553  
 125.583  
 124.858  
 123.574  
 122.088  
 -102.792  
 77.517  
 77.200  
 76.882  
 -53.578  
 -21.731

Title XH-IV-82.10.fid  
 Solvent CDCl3  
 Spectrometer Frequency 100.62  
 Nucleus 13C

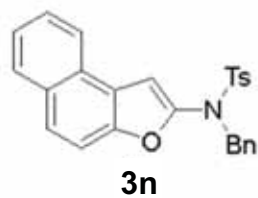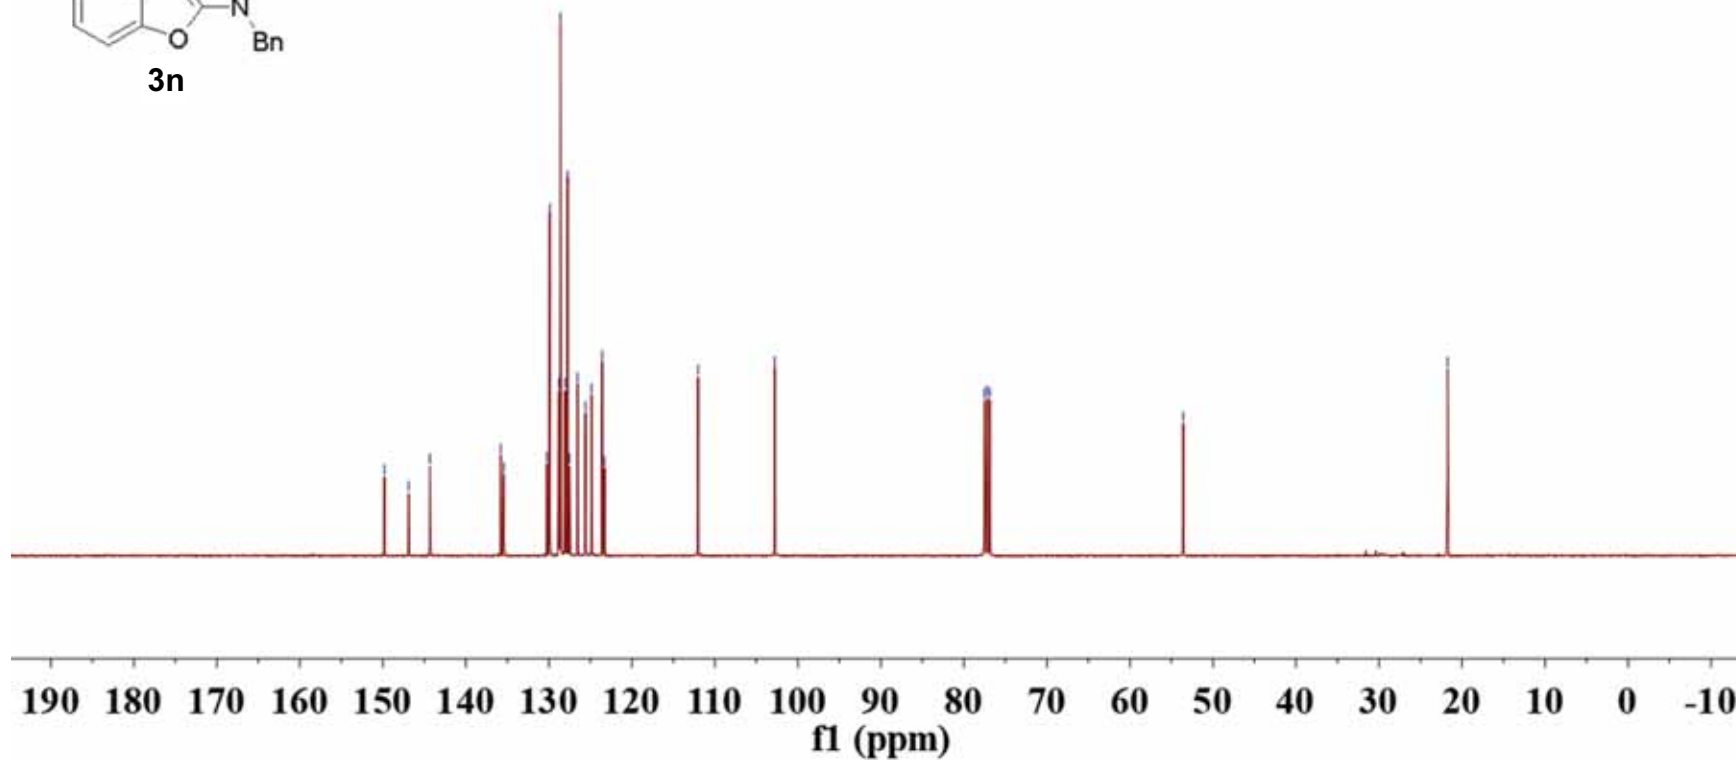



# $^1\text{H}$ NMR and $^{13}\text{C}$ NMR Spectra of 3-Acyl-2-Amidobenzofurans 5.

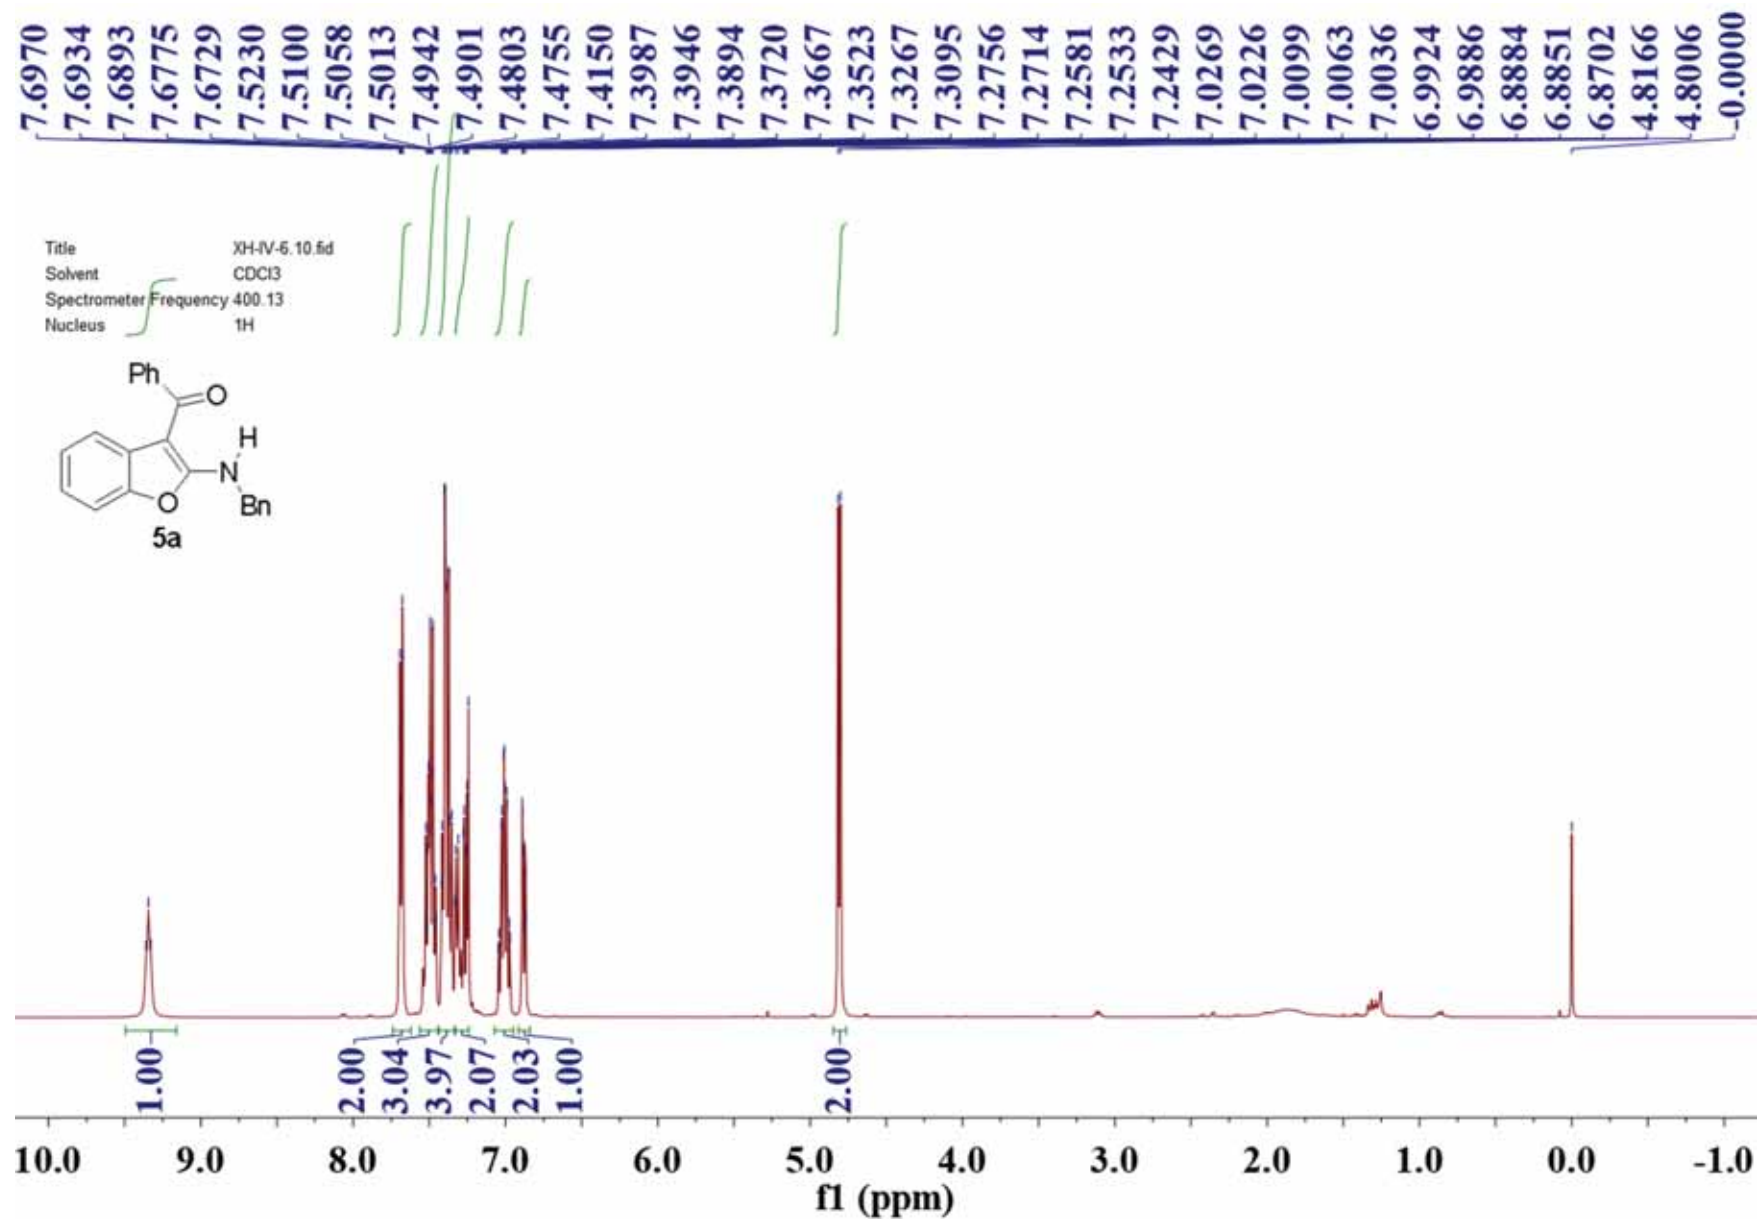

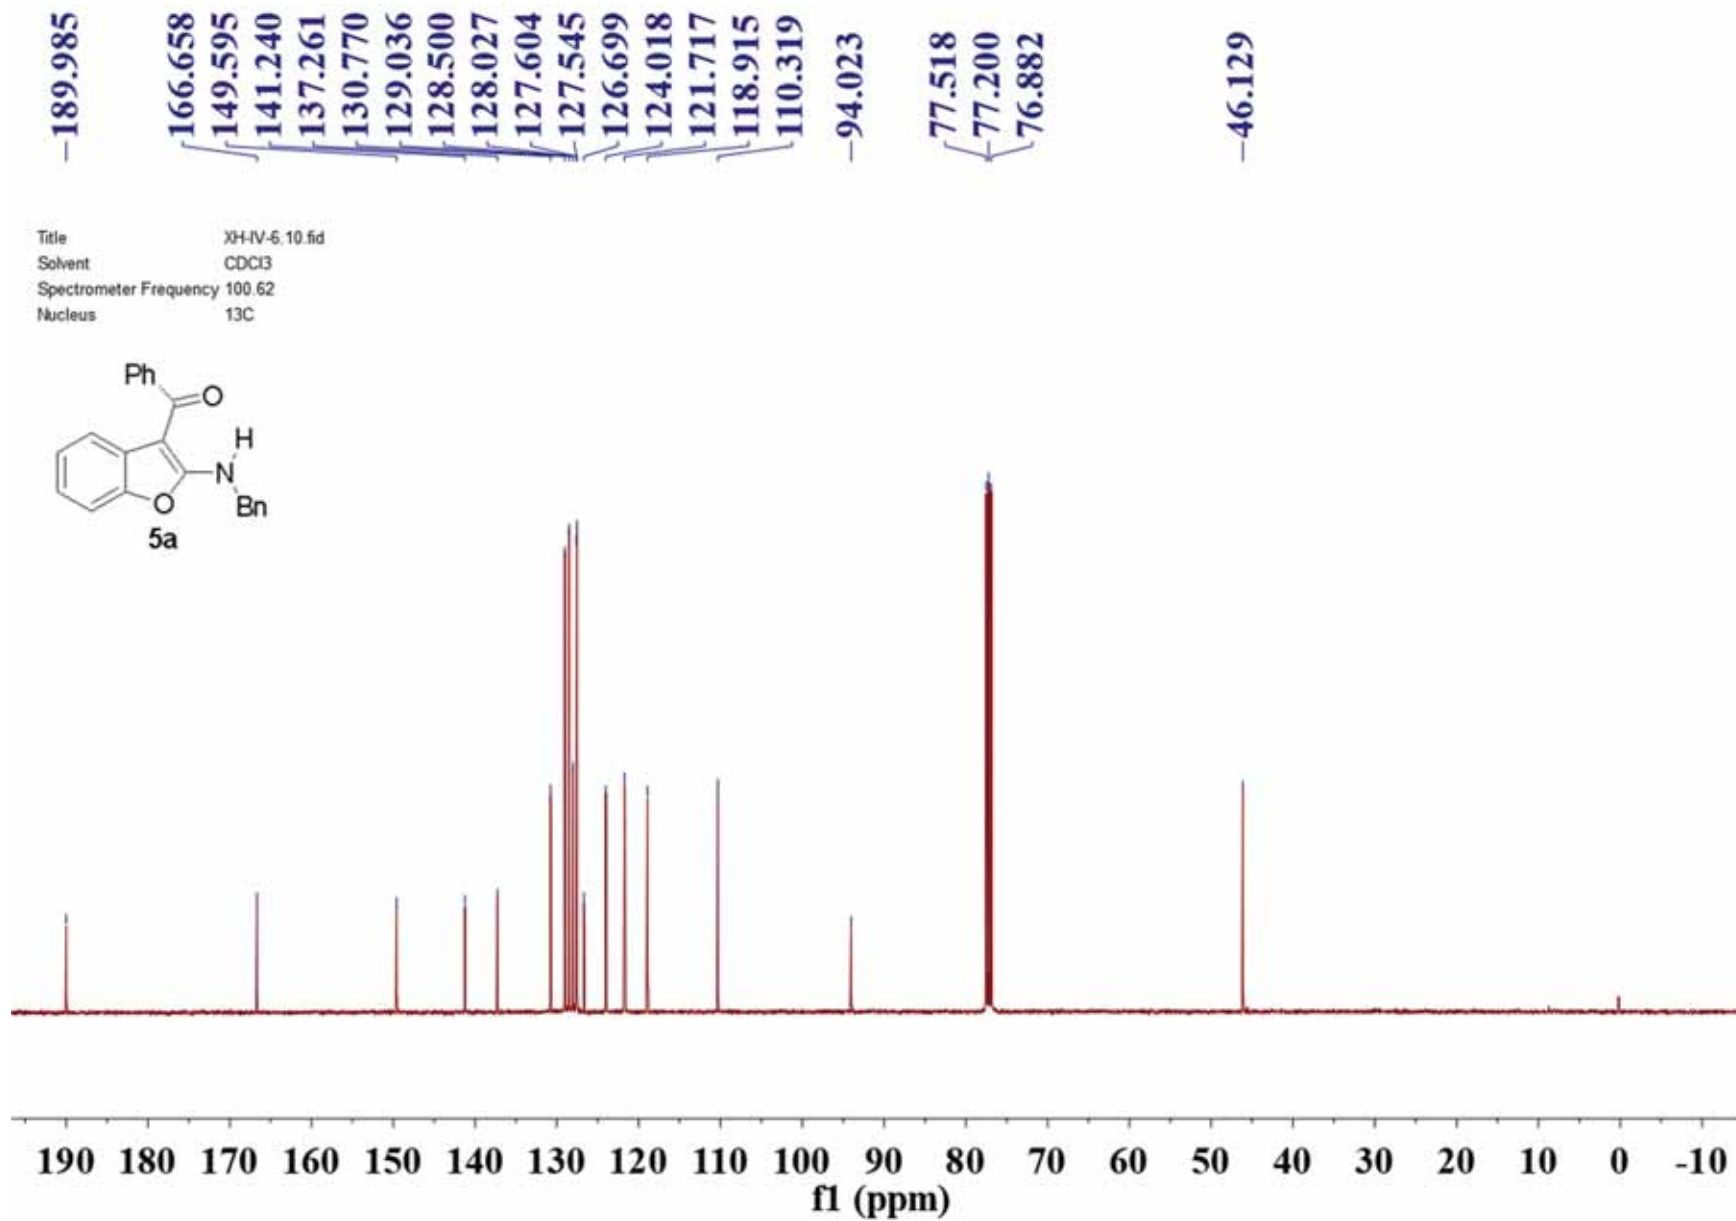

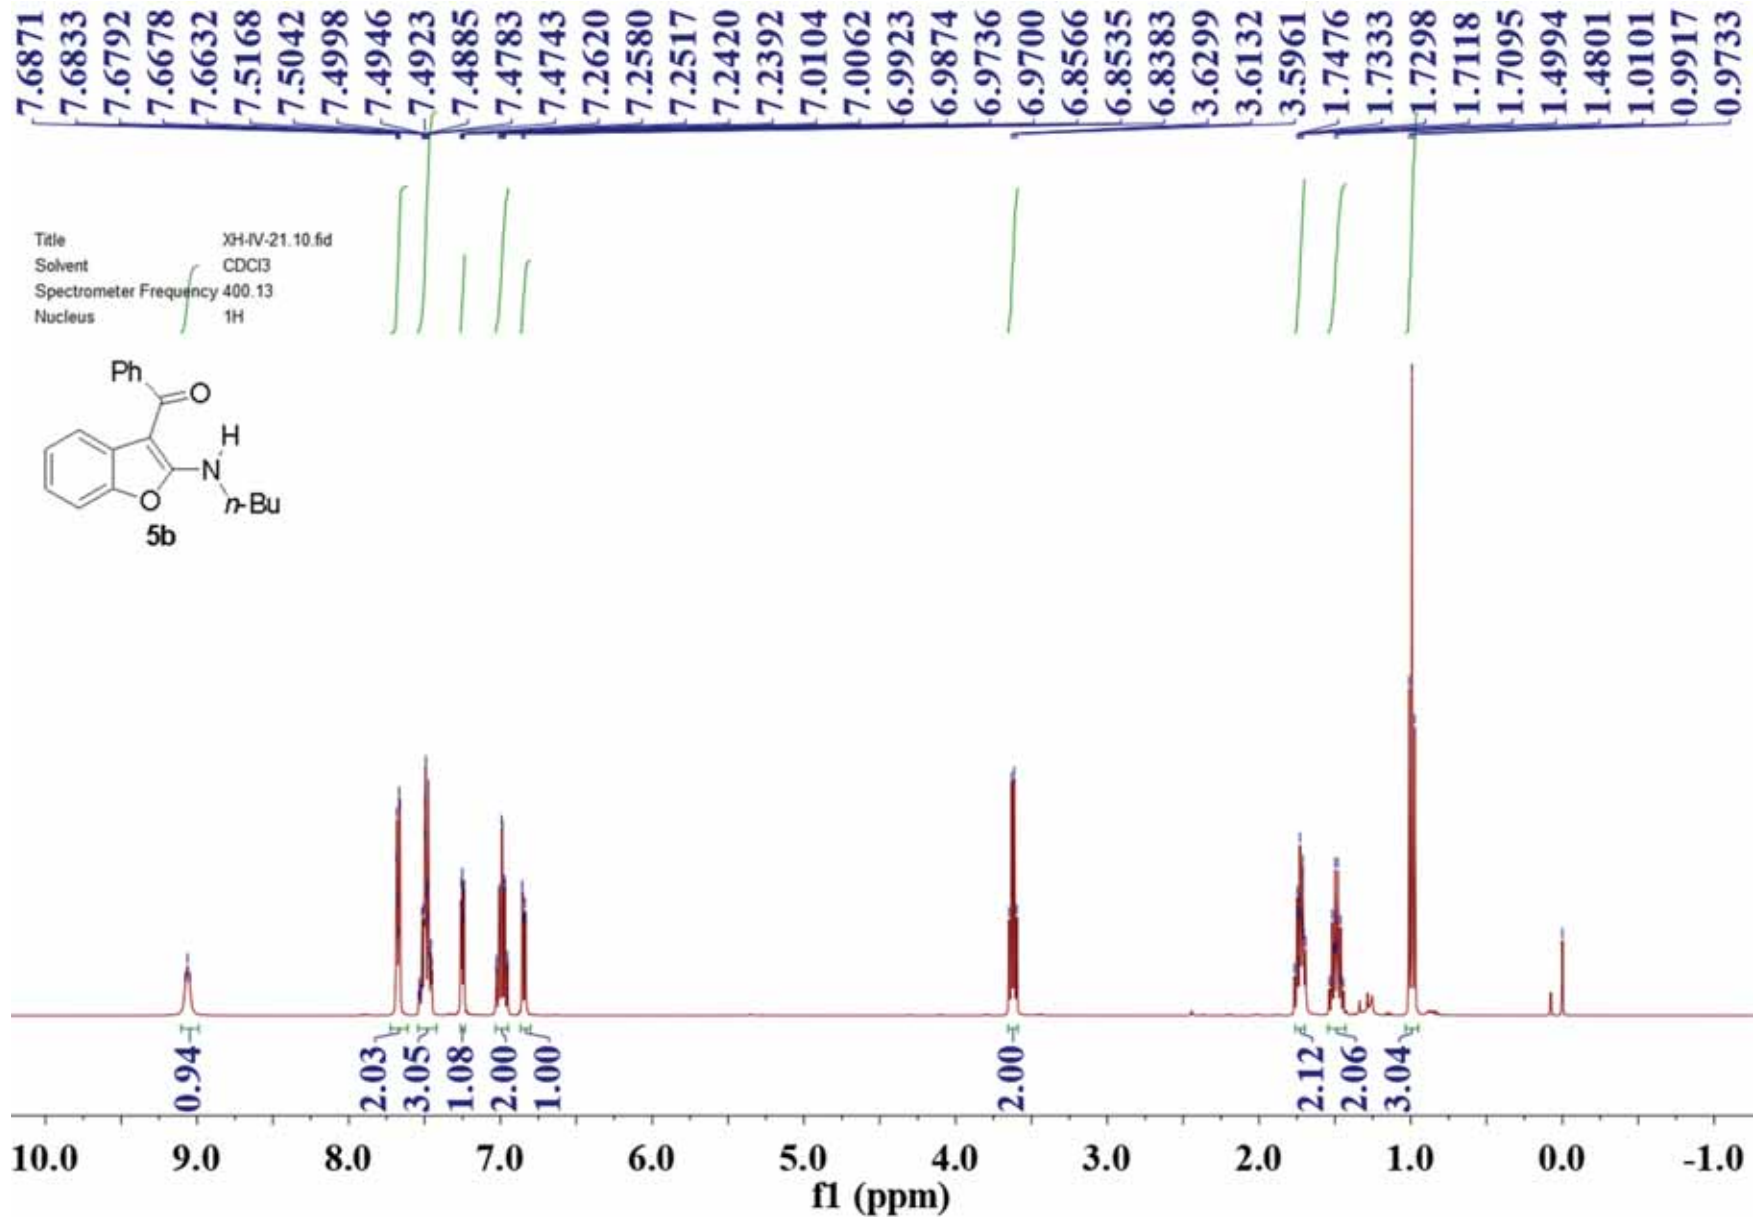

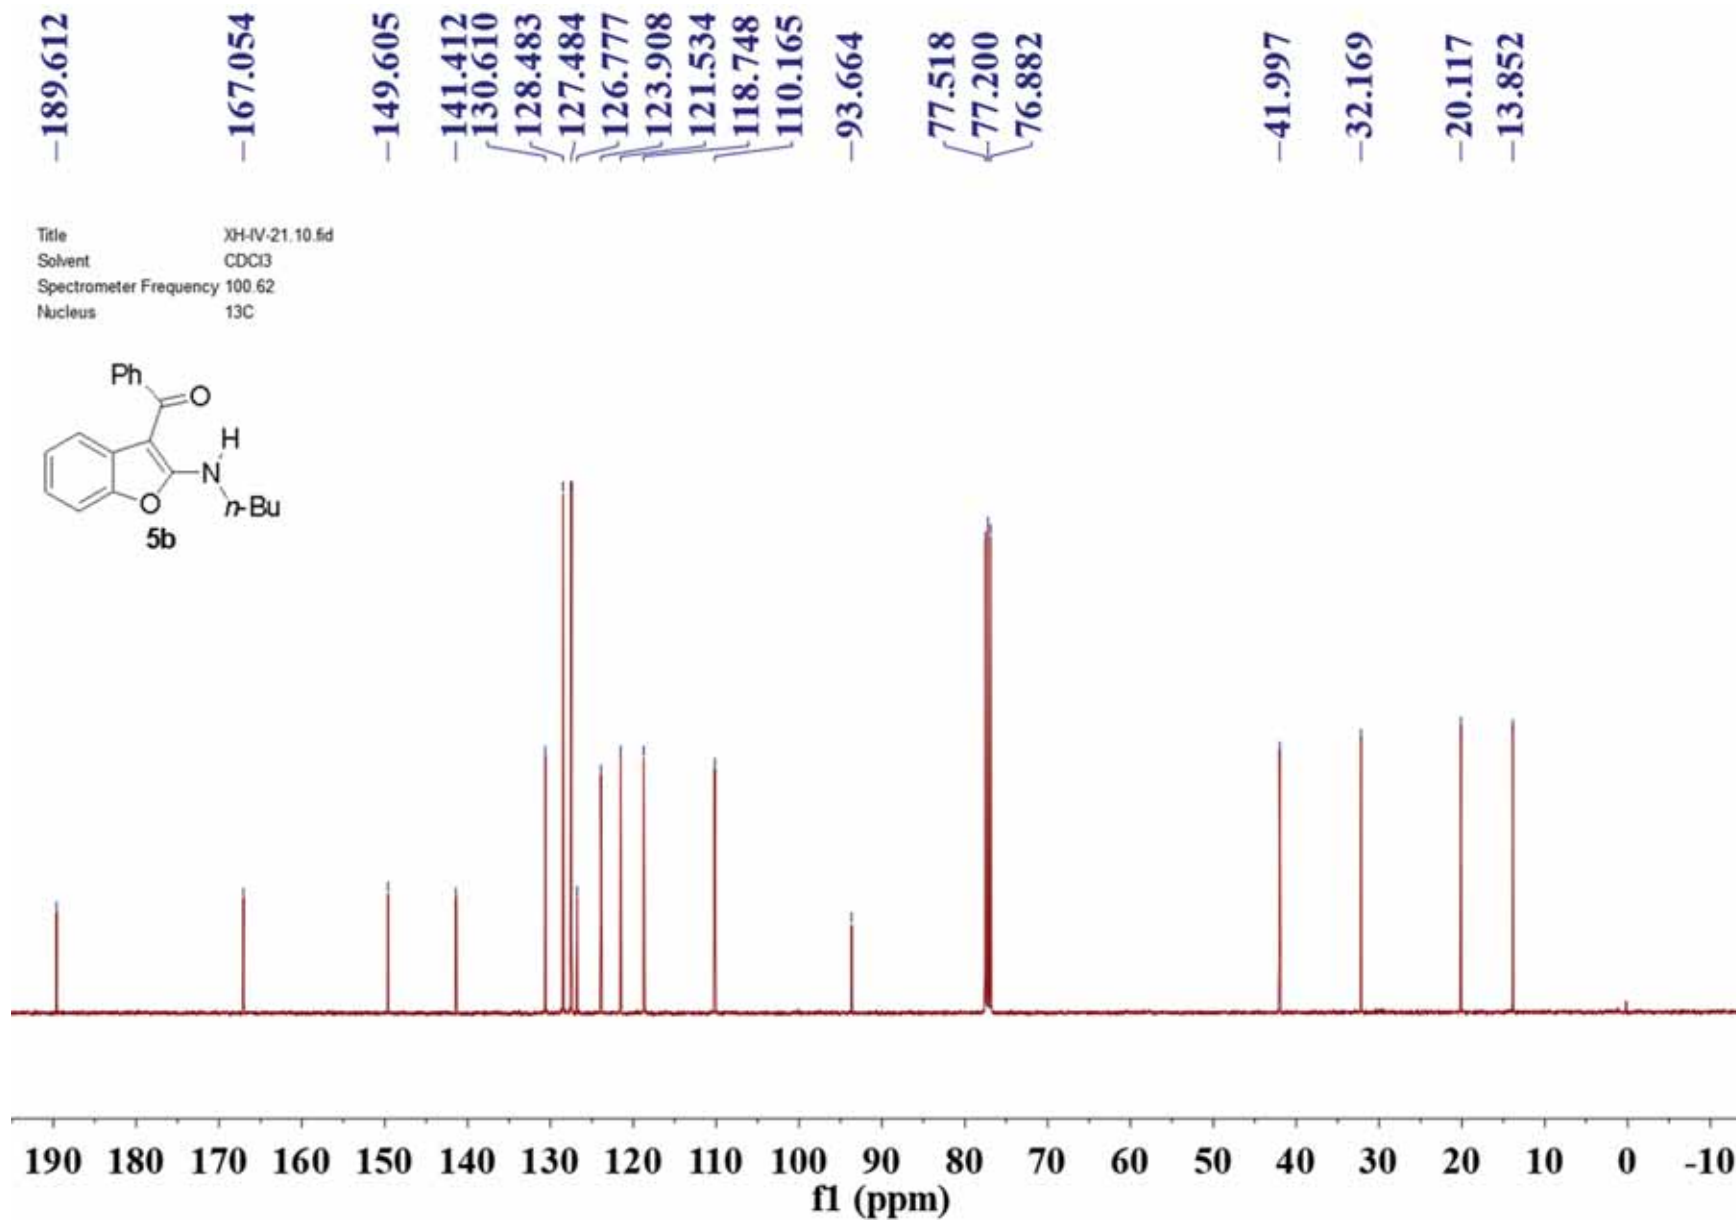

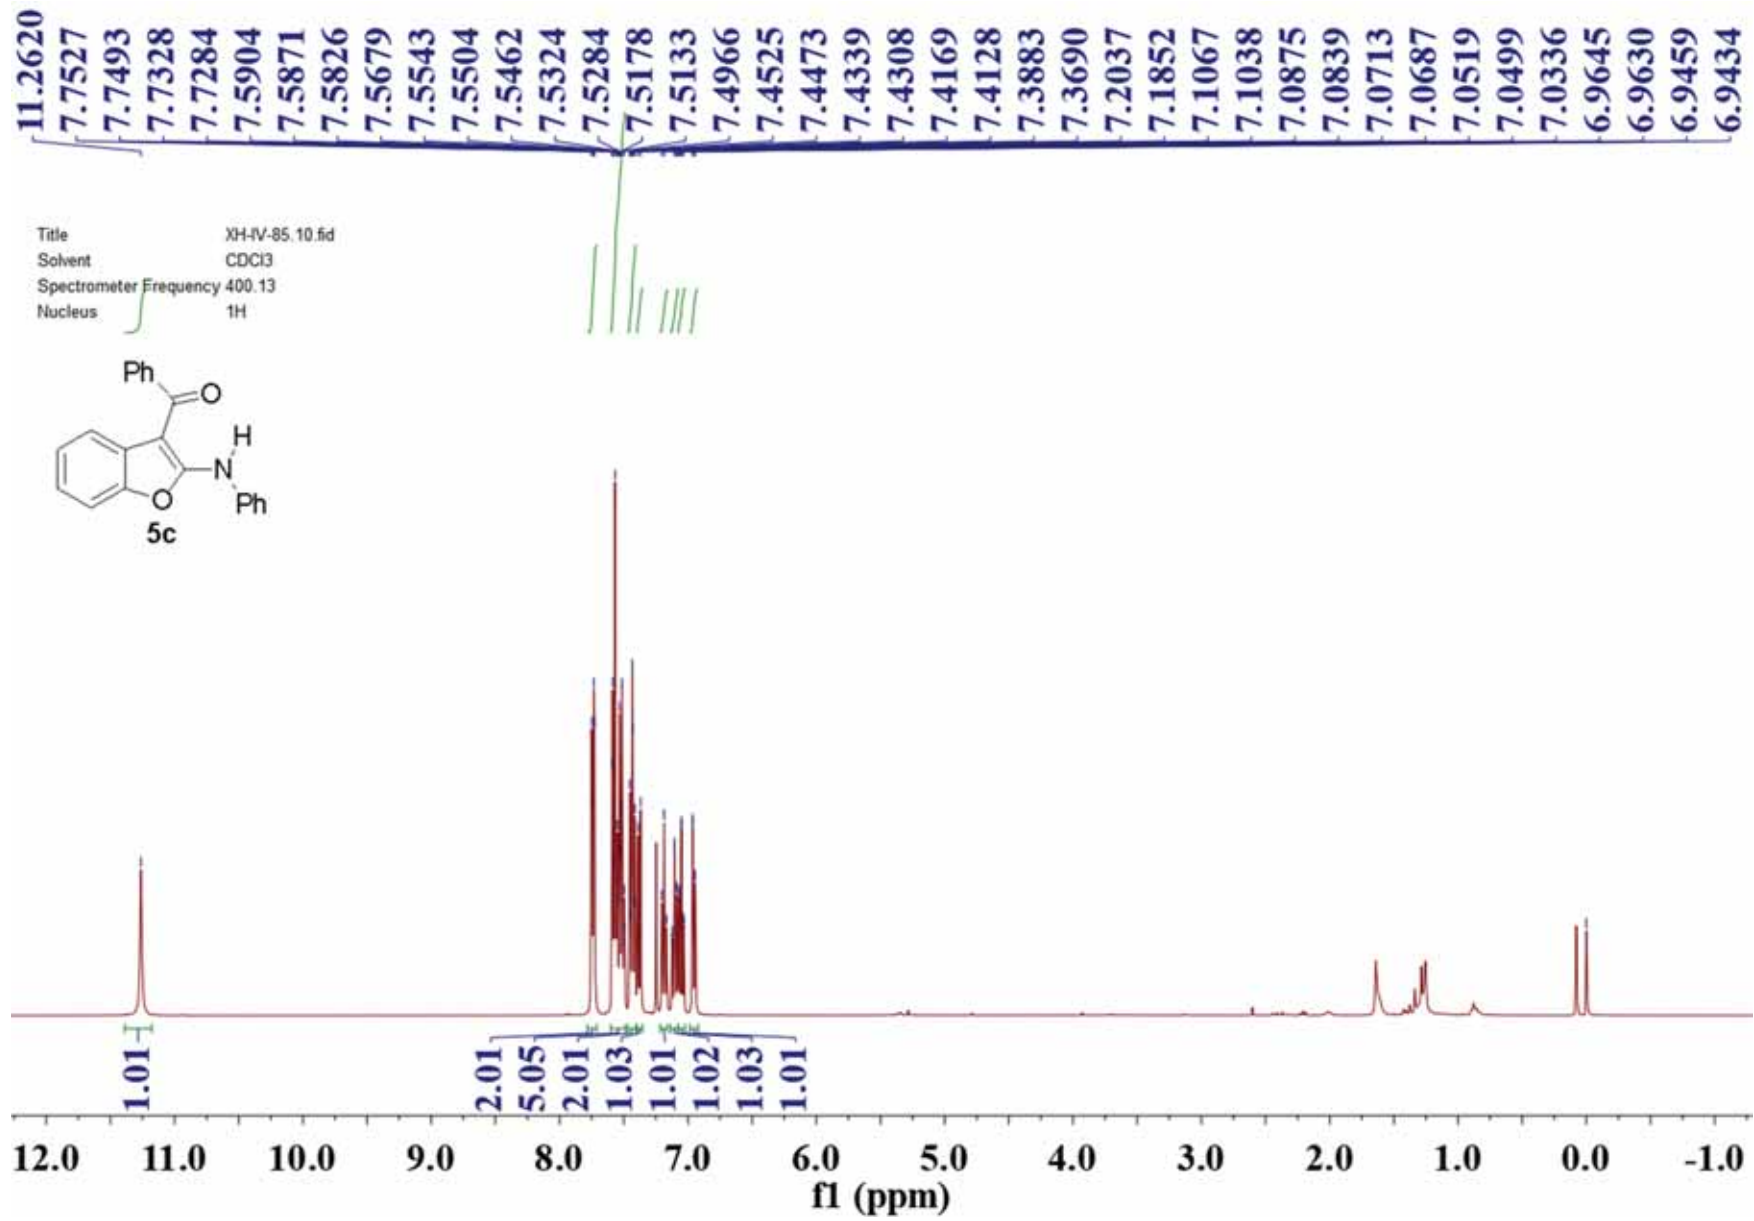

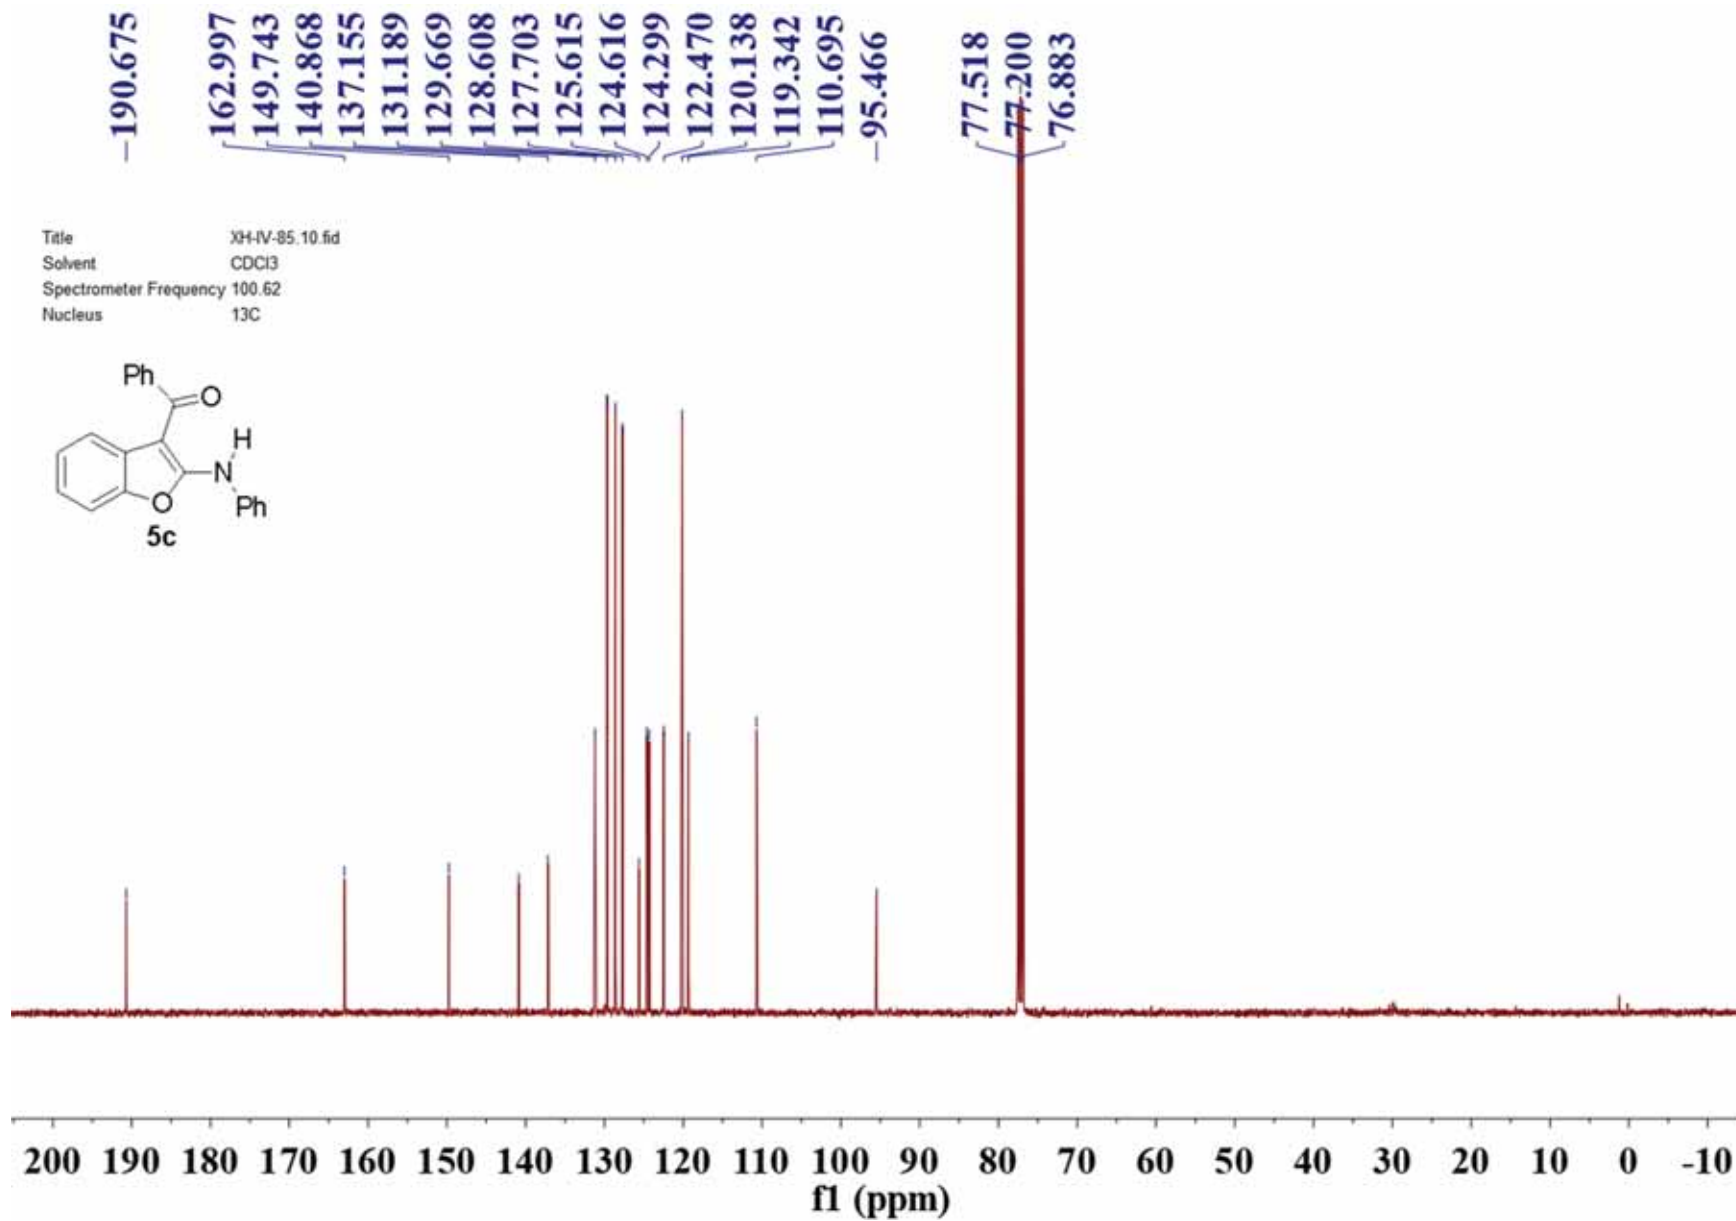

# <sup>1</sup>H NMR and <sup>13</sup>C NMR Spectra of 3-Alkyl-2-Amidobenzofurans 6.

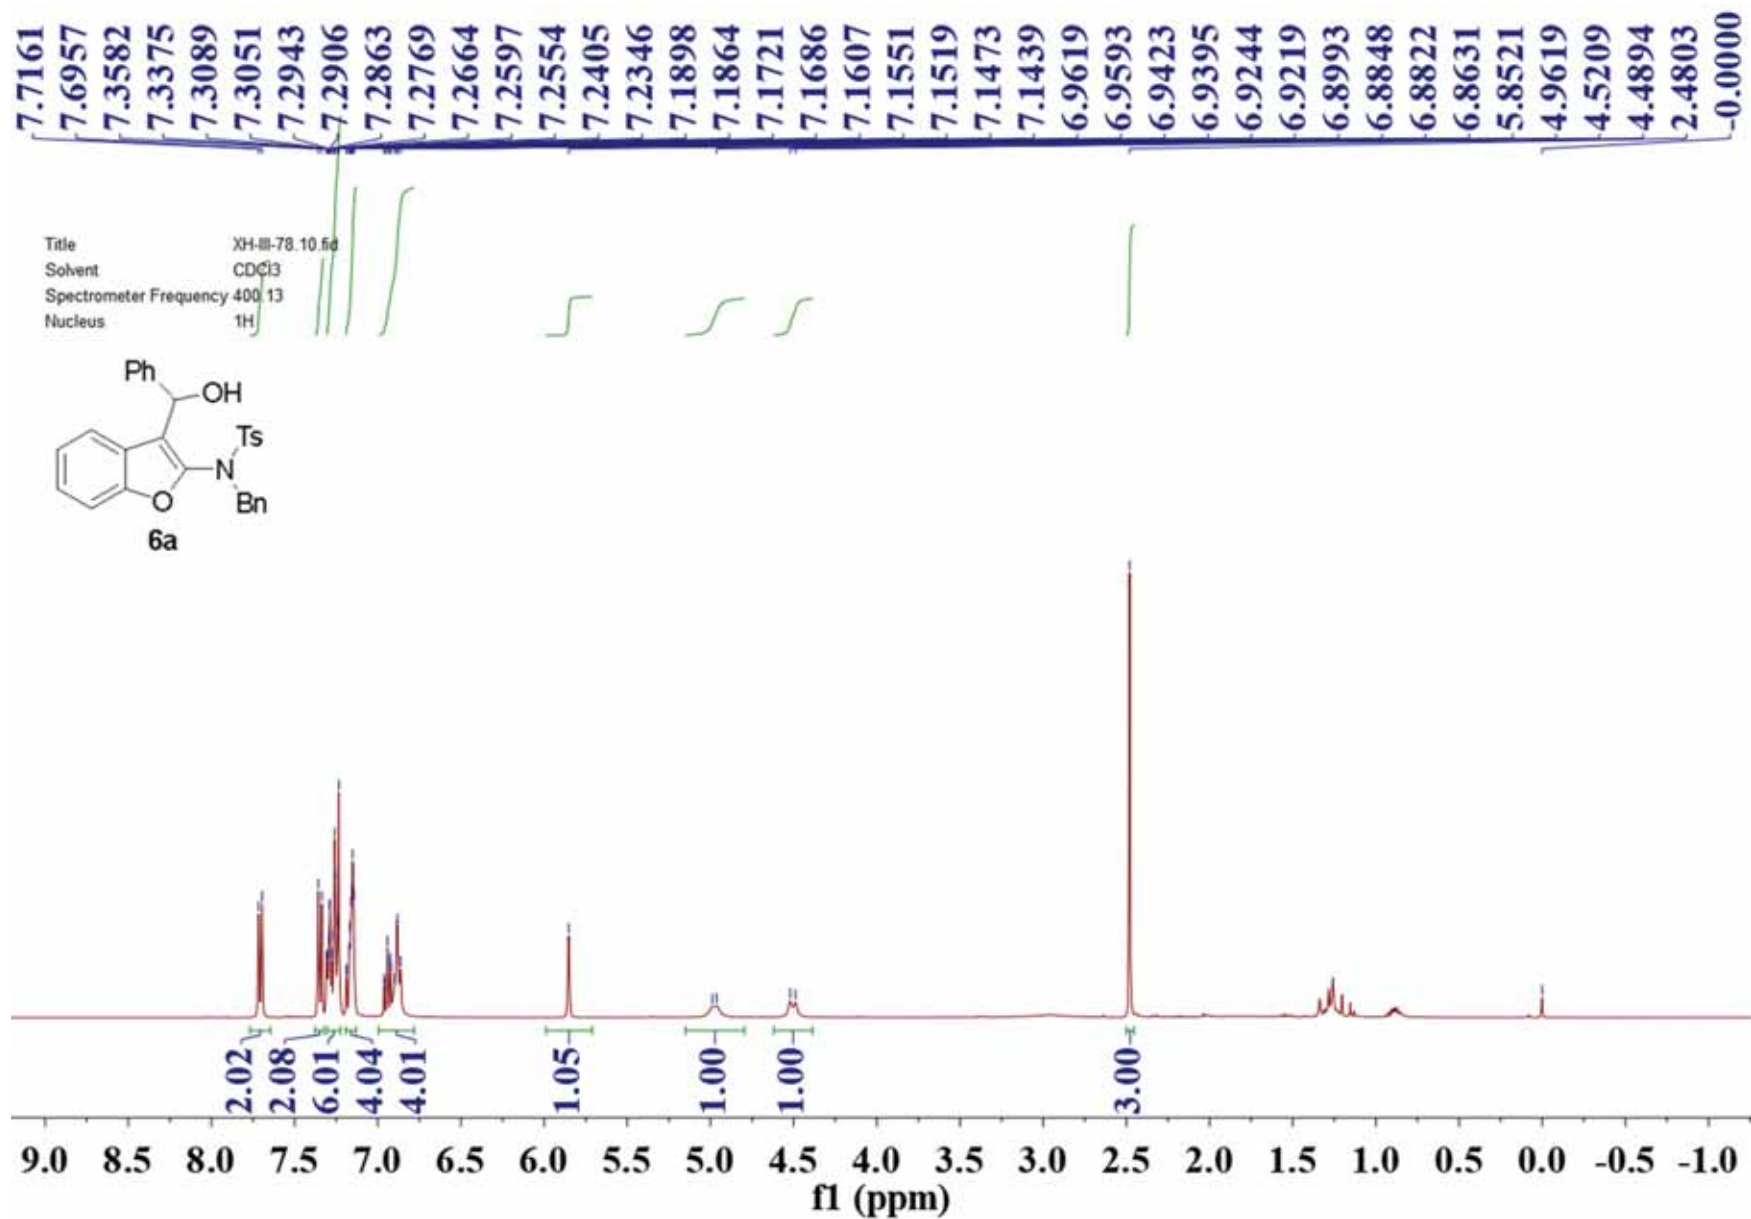

152.507  
 144.845  
 144.083  
 140.667  
 135.197  
 134.701  
 130.132  
 129.498  
 129.082  
 128.604  
 128.048  
 127.982  
 126.857  
 125.805  
 125.776  
 125.235  
 123.028  
 122.007  
 121.383  
 111.020  
 77.518  
 77.200  
 76.883  
 66.274  
 53.361  
 21.868

Title XH-III-78.10.fid  
 Solvent CDCl3  
 Spectrometer Frequency 100.62  
 Nucleus 13C

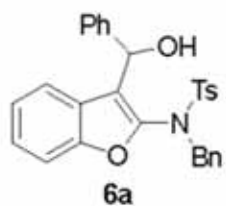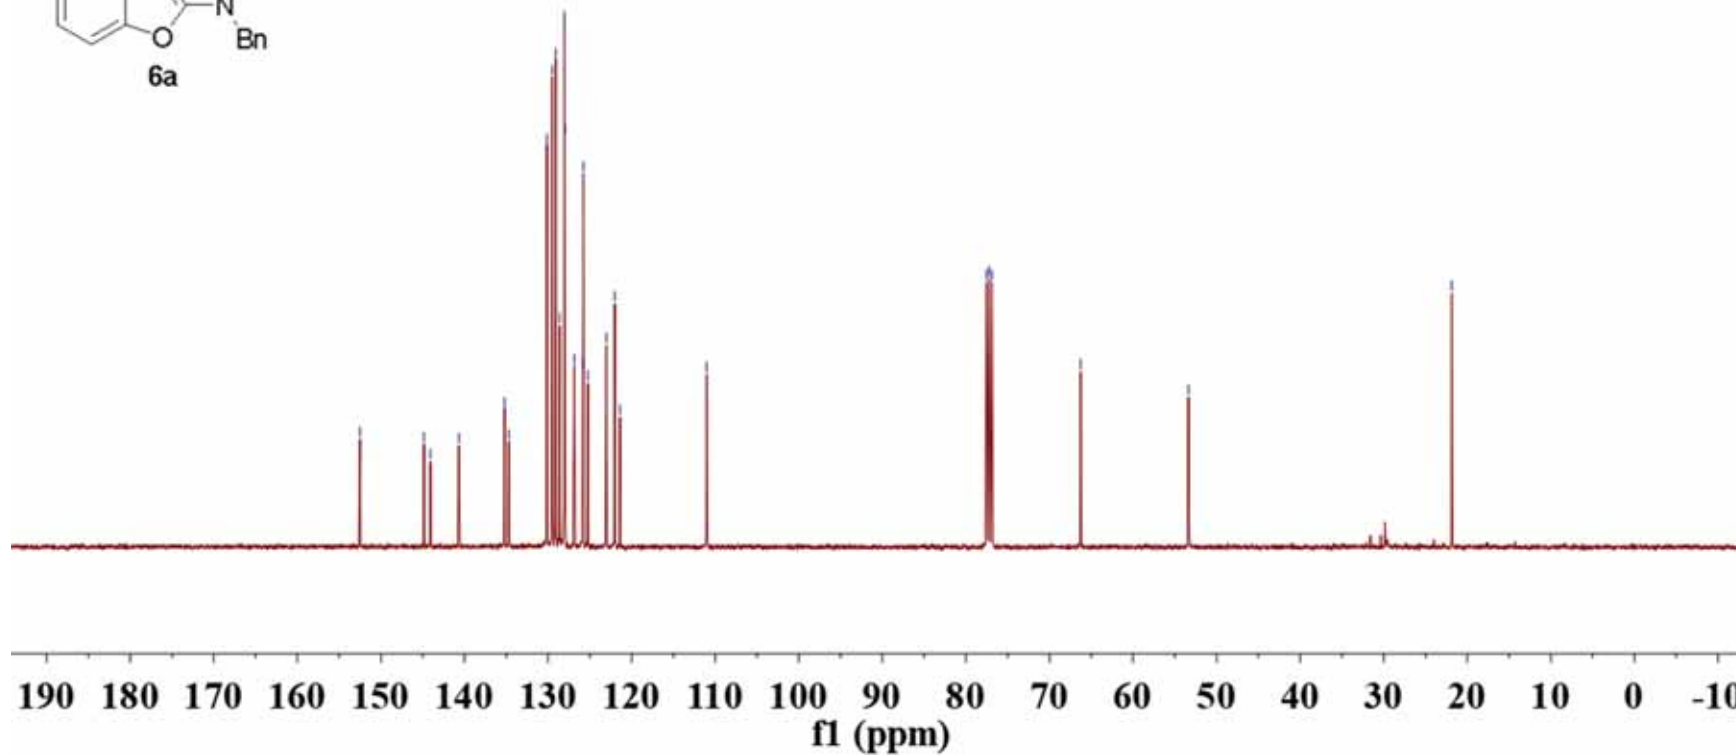



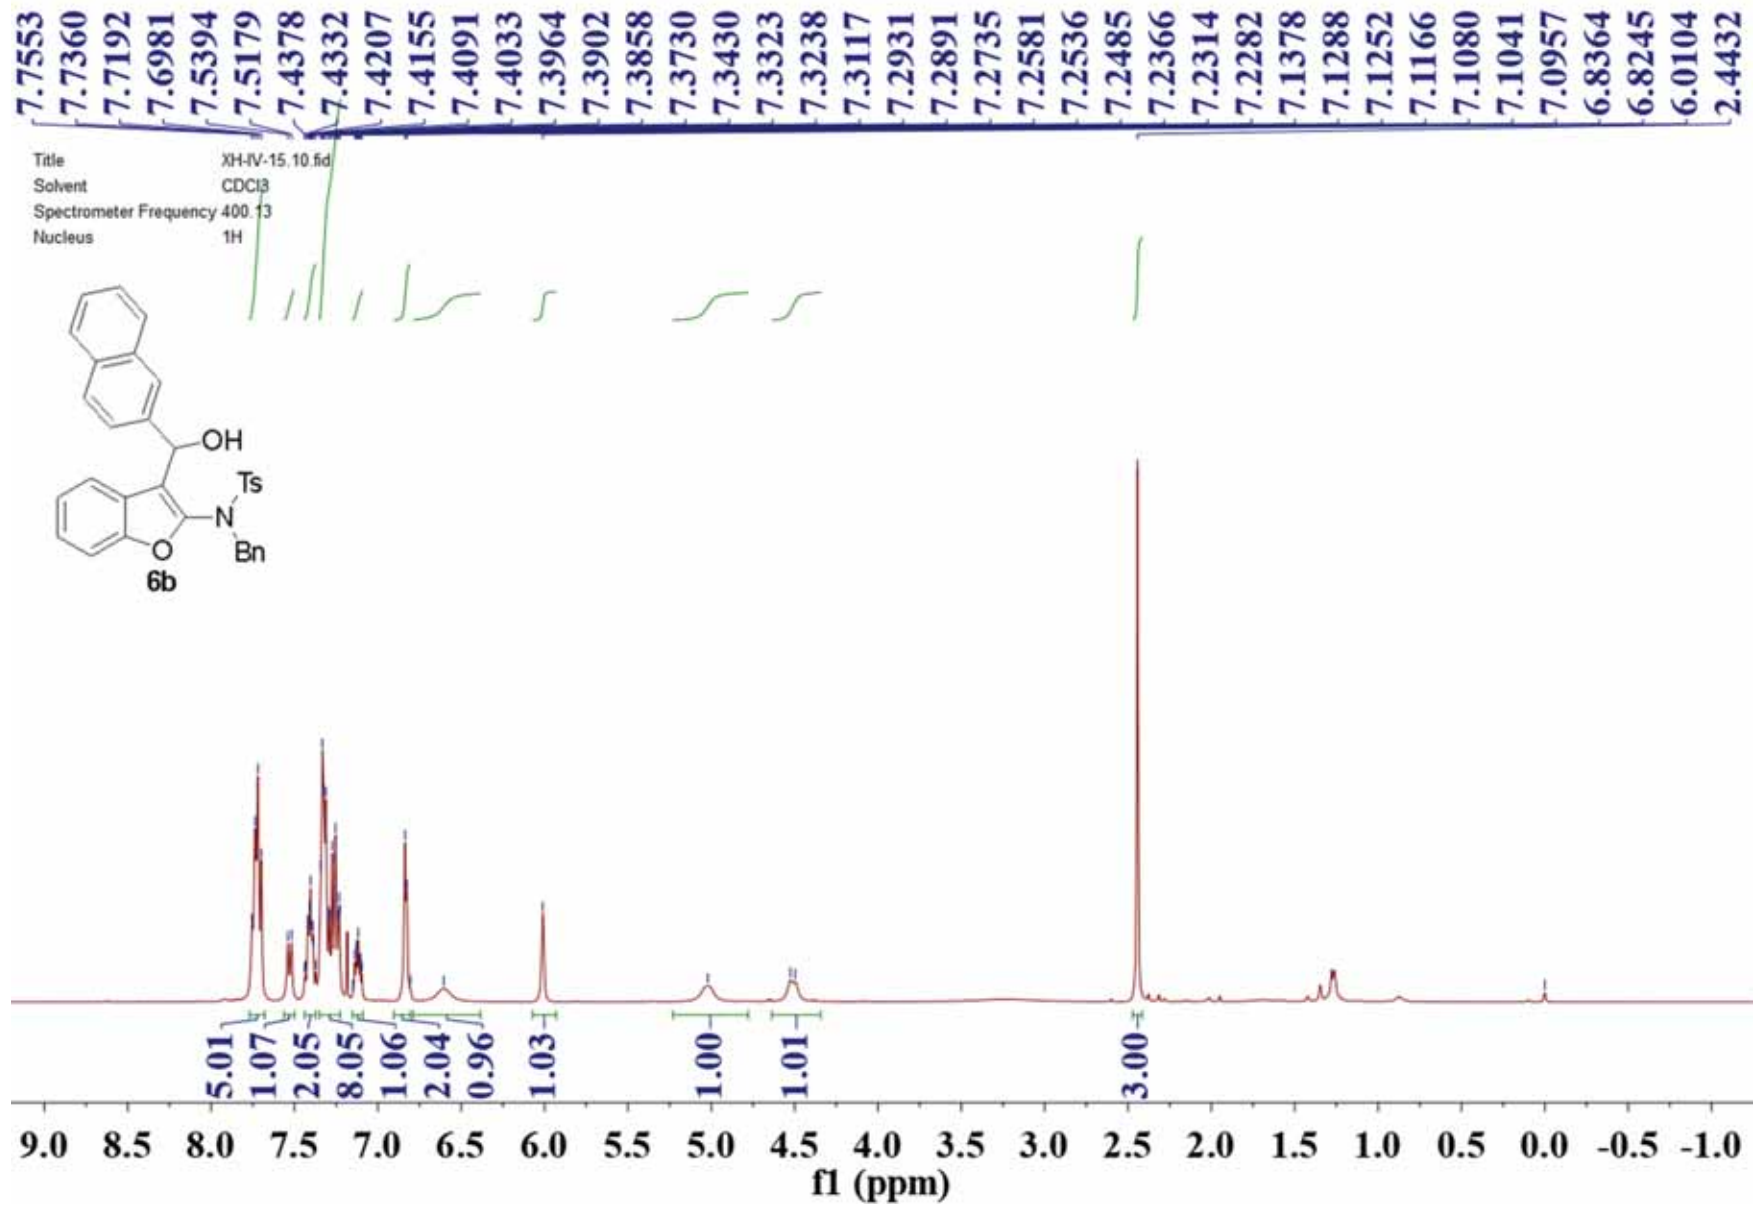

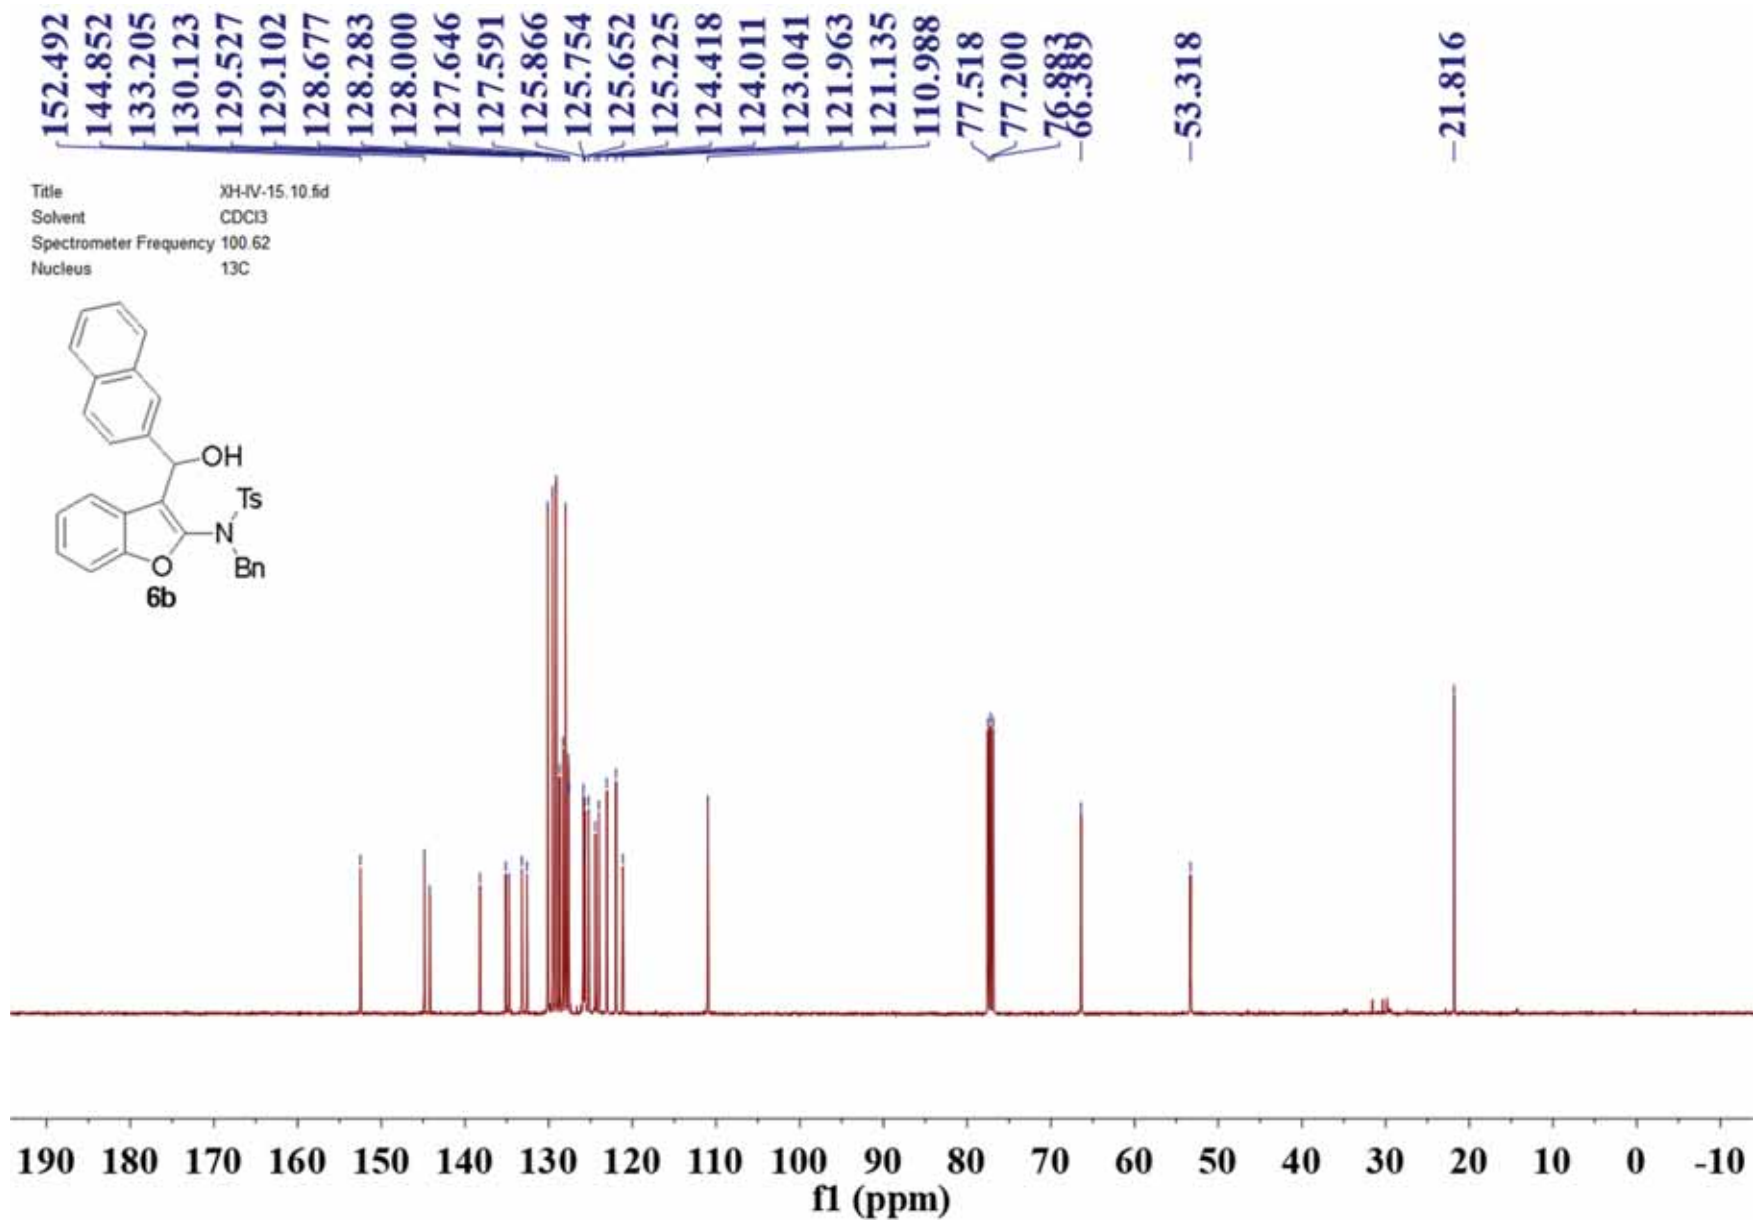

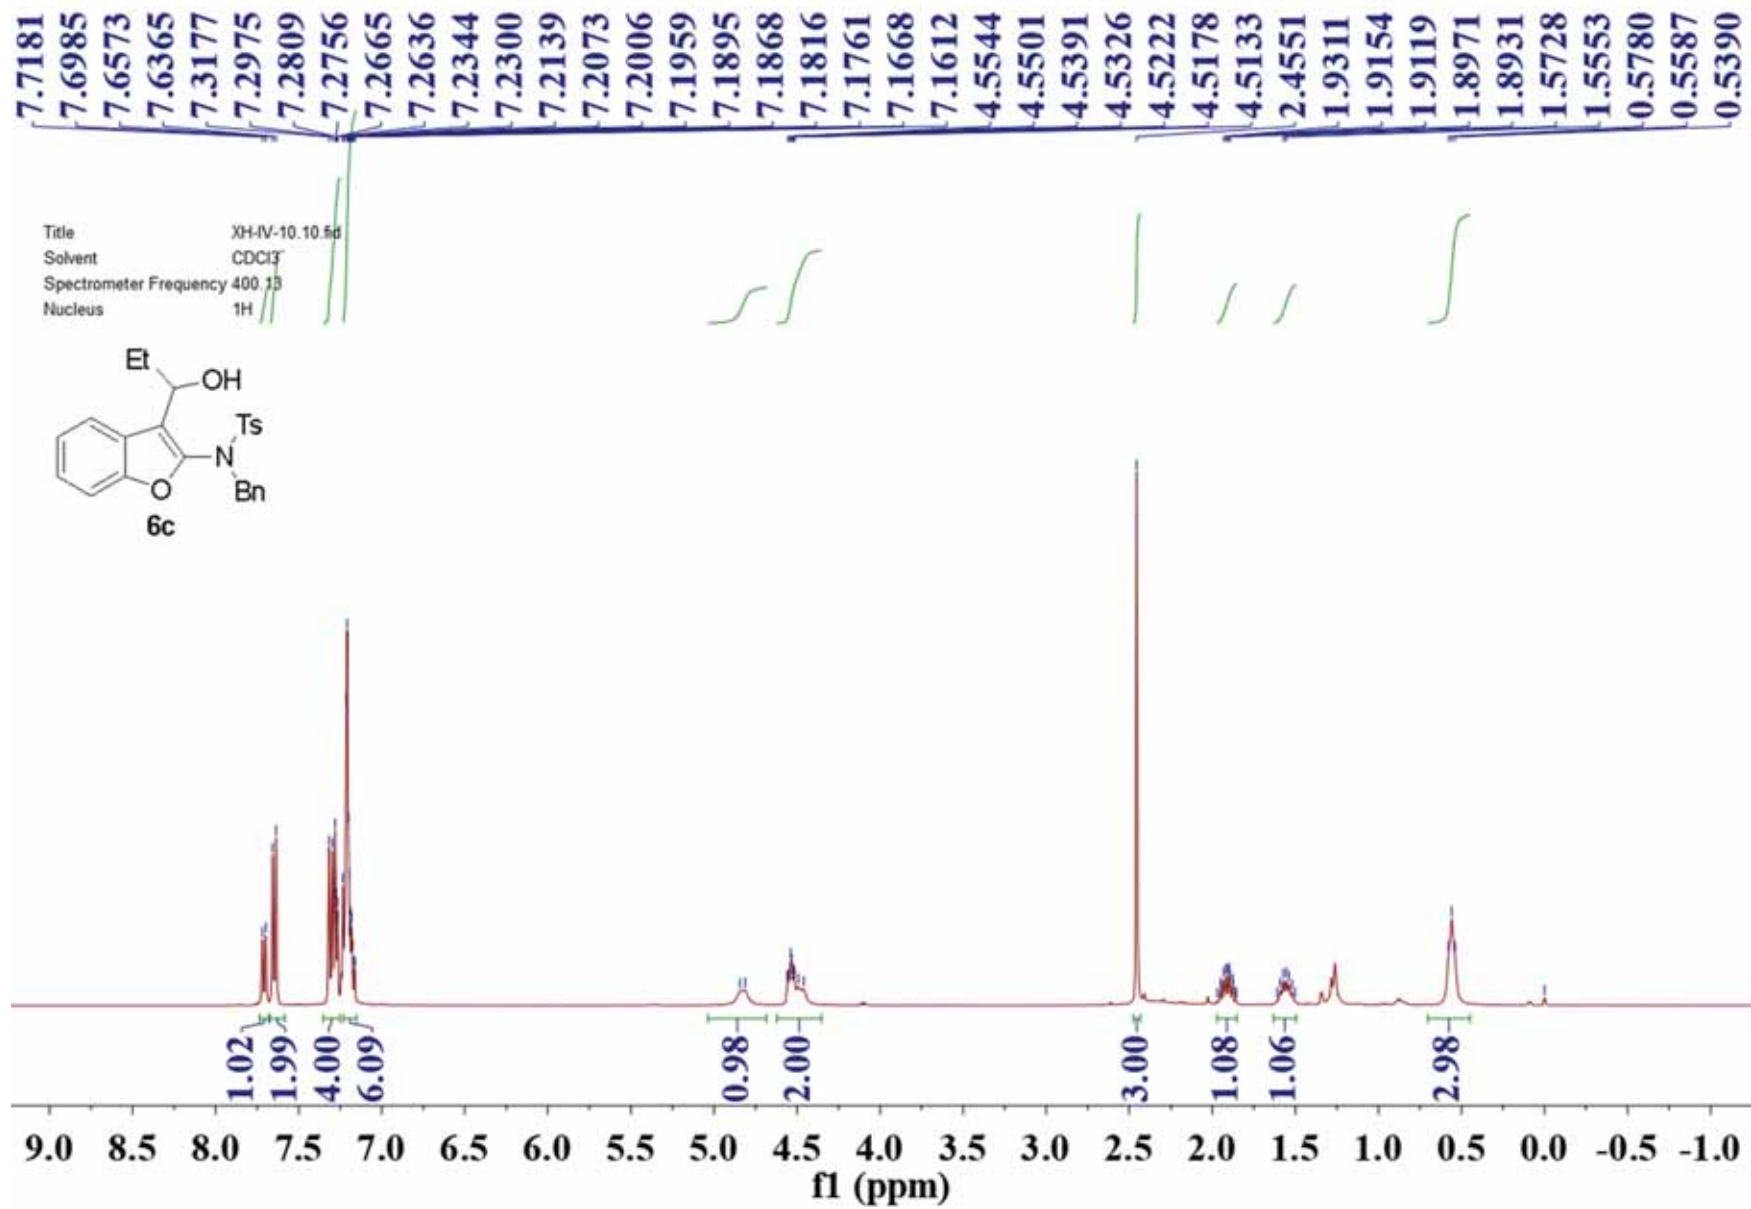

152.390  
 144.603  
 143.254  
 135.380  
 134.701  
 129.985  
 129.357  
 128.696  
 128.432  
 127.953  
 126.154  
 125.232  
 122.991  
 121.903  
 121.191  
 111.208  
 77.518  
 77.200  
 76.882  
 68.024  
 -53.347  
 -27.709  
 -21.787  
 -10.316

Title XH-IV-10.10.fid  
 Solvent CDCl3  
 Spectrometer Frequency 100.62  
 Nucleus 13C

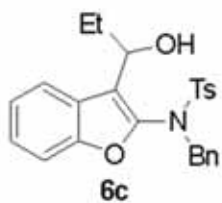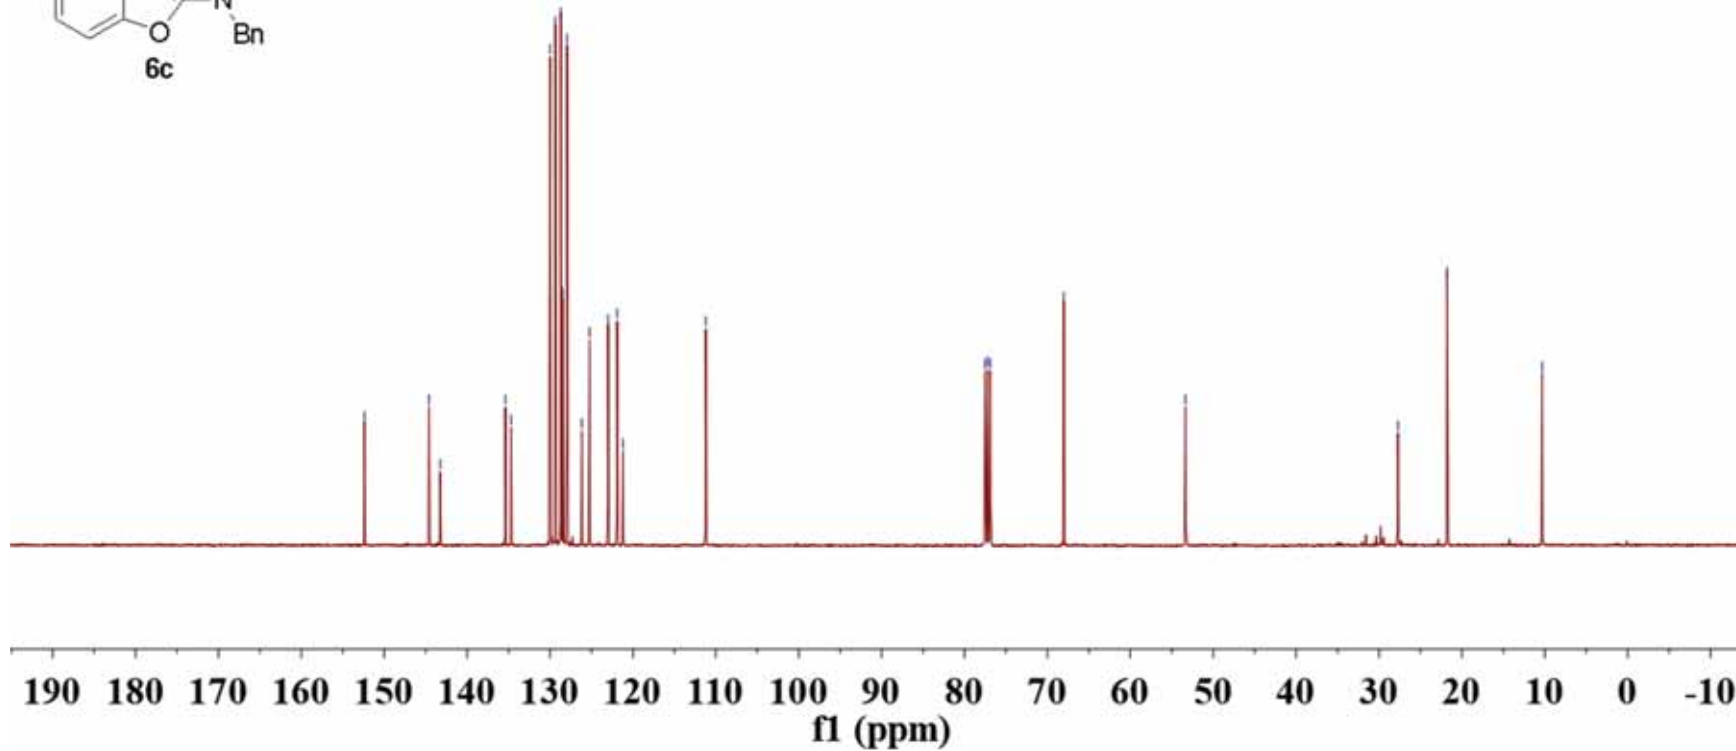

# MS (ESI) of *n*-BuCl: $m/z$ [M + Na]<sup>+</sup> 115

XH-V-35 #24-26 RT: 0.28-0.30 AV: 3 NL: 4.89E4  
T: ITMS + c ESI Full ms [80.00-1800.00]

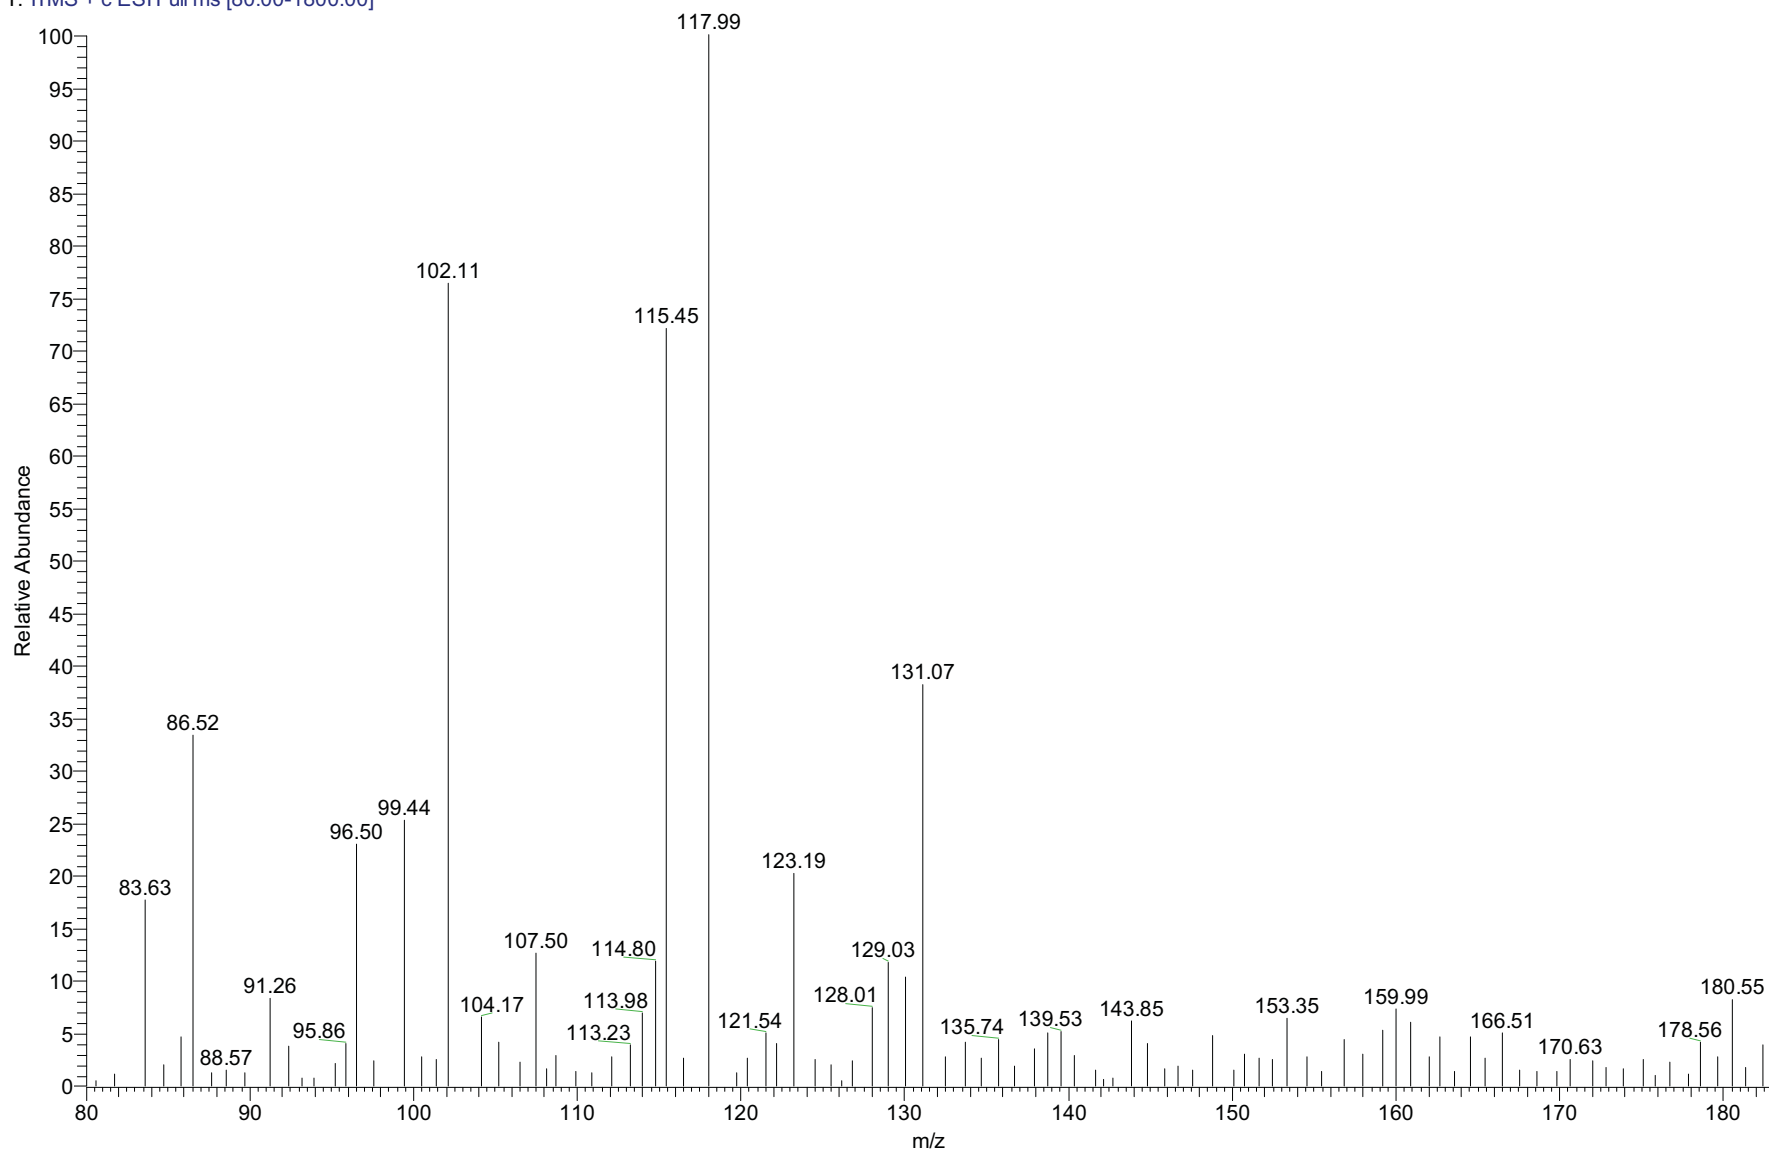

Supplement: d2qo01246d1.pdf [file d2qo01246d1.pdf]
